# Supplementary material for: Photocatalytic Z/E isomerization unlocking the stereodivergent construction of axially chiral alkene frameworks
Source: Springer Nature journal article supplement (doi:10.1038/s41467-024-47404-3), 2024-04-16
Supplement: 41467_2024_47404_MOESM1_ESM.pdf [file 41467_2024_47404_MOESM1_ESM.pdf]

## Supplementary Information

### Photocatalytic *Z/E* isomerization unlocking the stereodivergent construction of axially chiral alkene frameworks

Jie Wang,<sup>+</sup> Jun Gu,<sup>+</sup> Jia-Yu Zou, Meng-Jie Zhang, Rui Shen, Zhiwen Ye, Ping-Xun Xu, and Ying He\*

School of Chemistry and Chemical Engineering, Nanjing University of Science and Technology,  
Nanjing 210094, China

<sup>+</sup> These authors contributed equally.

\* E-mail: [yhe@njust.edu.cn](mailto:yhe@njust.edu.cn)

## Table of contents

|                                                                                                                   |     |
|-------------------------------------------------------------------------------------------------------------------|-----|
| General information.....                                                                                          | 3   |
| General procedure <b>A</b> : Synthesis of MBH carbonates .....                                                    | 4   |
| General procedure <b>B</b> : Synthesis of 2-quinolinone derivatives.....                                          | 5   |
| General procedure <b>C</b> : Optimized conditions for accessing ( <i>P</i> , <i>Z</i> )- <b>3</b> .....           | 7   |
| General procedure <b>D</b> : One-pot synthesis of axially chiral products ( <i>P</i> , <i>Z</i> )- <b>3</b> ..... | 8   |
| General procedure <b>E</b> : Optimized conditions for accessing ( <i>P</i> , <i>E</i> )- <b>3</b> .....           | 9   |
| General procedure <b>F</b> : Synthesis of axially chiral products ( <i>P</i> , <i>E</i> )- <b>3</b> .....         | 9   |
| General procedure <b>G</b> : One-pot synthesis of axially chiral products ( <i>P</i> , <i>E</i> )- <b>3</b> ..... | 9   |
| Racemization experiments .....                                                                                    | 40  |
| Large-scale reactions for the synthesis of <b>3a</b> .....                                                        | 42  |
| Stereodivergent synthesis of axially chiral <i>N</i> -vinylquinolinones <b>3a/3s</b> .....                        | 42  |
| Stereodivergent transformations of axially chiral <i>N</i> -vinylquinolinones <b>3</b> .....                      | 45  |
| Photocatalyzed <i>Z/E</i> isomerization of non atropisomeric substrates .....                                     | 53  |
| Density functional theory studies .....                                                                           | 55  |
| X-ray crystal structures .....                                                                                    | 59  |
| NMR spectrum data.....                                                                                            | 64  |
| HPLC spectrum data.....                                                                                           | 132 |
| References.....                                                                                                   | 200 |

## General information

Unless otherwise noted, all starting materials were purchased from commercial sources and used without any further purification. The analytical data for the known compounds were found to match with the literature data and stored at -20 °C under an inert atmosphere. Room temperature = 23-25 °C. Thin layer chromatograph plates were visualized under UV light (254 nm) or by staining with phosphomolybdic acid or  $\text{KMnO}_4$  followed by heating. Abbreviations are reported as follows: DCM = dichloromethane, DCE = dichloroethane, THF = tetrahydrofuran, DMF = *N,N*-dimethylformamide, DME = 1,2-Dimethoxyethane, PE = petroleum ether, EA = ethyl acetate, TLC = thin layer chromatograph, dr = diastereomeric ratio. Nuclear magnetic resonance (NMR) spectra were recorded using an AVANCE 500 Bruker spectrometer and chemical shifts were reported in ppm. Multiplicities are reported using the following abbreviations: s = singlet, d = doublet, t = triplet, q = quartet, m = multiplet. High resolution mass spectral data were acquired on Agilent Technologies Accurate-Mass Q-TQF LC/MS 6520. Enantiomeric excesses (ee) were determined on a Thermo Ultimate 3000 Chiral HPLC by using AD, OD, IA, IC, and ID columns.

Photoreactions were performed in a foil-wrapped box, which is placed in lab at a constant 25 °C. The distance between the reaction vessels and the LED bulb (420 nm) was set at approximately 7-8 cm for all reactions which is shown in the picture.

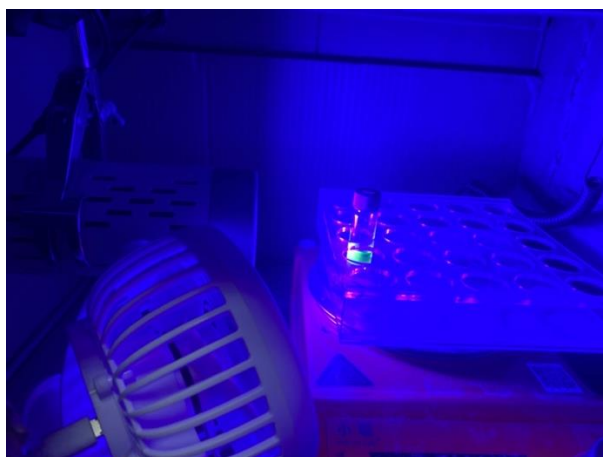

**Supplementary Fig. 1. The picture of the photocatalytic reaction.**

## General procedure A: Synthesis of MBH carbonates

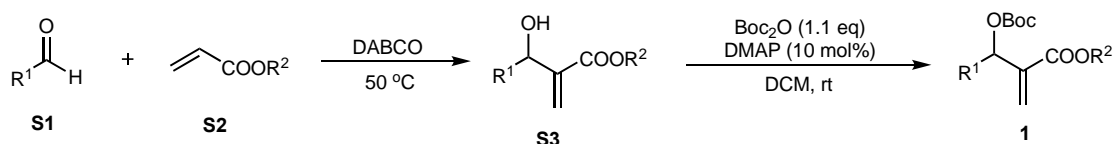

MBH alcohols **S3** were synthesized according to the following procedure. To a round flask equipped with a magnetic stirring bar was added aldehyde **S1** (10 mmol), acrylic ester **S2** (15 mmol) and DABCO (1,4-diazabicyclo[2.2.2]octane) (10 mmol). The reaction mixture was heated to 50 °C and stirred for 1-7 days. The reaction was monitored by TLC. When the reaction was completed, it was diluted with water and extracted with DCM (20 mL×3). The combined organic layers were washed with brine, dried over anhydrous Na<sub>2</sub>SO<sub>4</sub>, filtered and concentrated in vacuum. The crude product was purified by column chromatography on silica gel with PE/EA as eluent to give the desired alcohols **S3**.

To a round flask equipped with a magnetic stirring bar was added **S3** (10.0 mmol, 1.0 eq), DMAP (1.0 mmol, 0.1 eq) and DCM (50 mL). Boc<sub>2</sub>O (11.0 mmol, 1.1 eq) was then added into the mixture at room temperature. The resulting mixture was stirred at room temperature for 0.5-2 hours, and then diluted with water and extracted with DCM (20 mL×3). The combined organic layers were washed with brine, dried over anhydrous Na<sub>2</sub>SO<sub>4</sub>, filtered and concentrated in vacuum. The crude product was purified by a silica gel flash chromatography (PE/EA) to give compound **1**.

### *tert*-butyl 2-(benzo[*b*]thiophen-2-yl(*tert*-butoxycarbonyloxy)methyl)acrylate (**1m**)

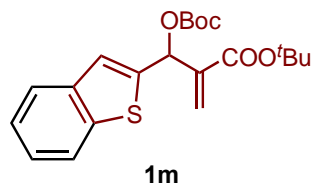

Following the general procedure **A**, **1m** was obtained as white solid. <sup>1</sup>H NMR (500 MHz, Chloroform-*d*) δ 7.84 (d, *J* = 7.4 Hz, 1H), 7.78 (d, *J* = 7.4 Hz, 1H), 7.40-7.35 (m, 3H), 6.80 (s, 1H), 6.46 (s, 1H), 6.05 (s, 1H), 1.54 (s, 9H), 1.47 (s, 9H). <sup>13</sup>C NMR (126 MHz, Chloroform-*d*) δ 163.81, 152.30, 141.71, 140.29, 140.06, 139.24, 125.34, 124.64, 124.36, 123.94, 123.66, 122.41, 83.00, 81.82, 71.63, 27.99, 27.83. HRMS(ESI) *m/z*:

calculated for  $[C_{21}H_{26}O_5S + H]^+$  391.1574, found 391.1579.

## General procedure B: Synthesis of 2-quinolinone derivatives

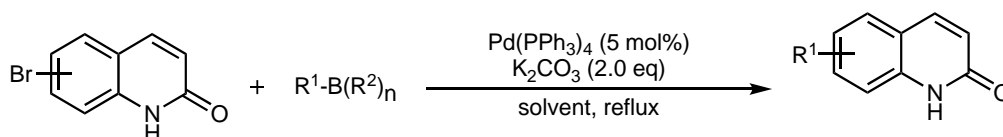

To a flame-dried round-bottom flask filled with argon were added 2-quinolinone (10 mmol, 1.0 eq), potassium methyltrifluoroborate or aryl boric acid ester (20 mmol, 2.0 eq),  $K_2CO_3$  (20 mmol, 2.0 eq) and  $Pd(PPh_3)_4$  (0.5 mmol, 0.05 eq). Toluene/MeOH/ $H_2O$  (10:3:2, 30 mL) were added before the mixture was heated to 110 °C, and then the mixture was stirred for 12 hours. After cooling down to room temperature, the mixture was filtered through celite and treated with water. Then the solution was separated and extracted with EA (20 mL x 3). The combined organic layers were washed with saturated NaCl aqueous (30 mL), dried over anhydrous  $Na_2SO_4$ , filtered and concentrated in vacuum. The crude product was purified by column chromatography over silica gel (PE: EA= 5:1 to 2:1) to afford the desired product.

### 7-(prop-1-en-2-yl)quinolin-2(1H)-one (2x)

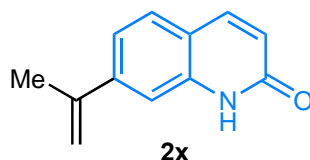

Following the general procedure **B**, **2x** was obtained as white solid.  $^1H$  NMR (500 MHz, DMSO- $d_6$ )  $\delta$  11.69 (s, 1H), 7.88 (d,  $J = 9.5$  Hz, 1H), 7.62 (d,  $J = 8.2$  Hz, 1H), 7.39 – 7.35 (m, 2H), 6.47 (d,  $J = 9.5$  Hz, 1H), 5.52 (s, 1H), 5.23 (s, 1H), 2.13 (s, 3H).  $^{13}C$  NMR (126 MHz, DMSO- $d_6$ )  $\delta$  161.42, 141.62, 141.33, 139.19, 138.44, 127.14, 121.11, 118.60, 117.89, 113.75, 111.11, 20.74. HRMS(ESI)  $m/z$ : calculated for  $[C_{12}H_{11}NO + H]^+$  186.0913, found 186.0919.

### 7-(4-(((1S,2R,5S)-2-isopropyl-5-methylcyclohexyl)oxy)methyl)phenyl)quinolin-2(1H)-one (2y)

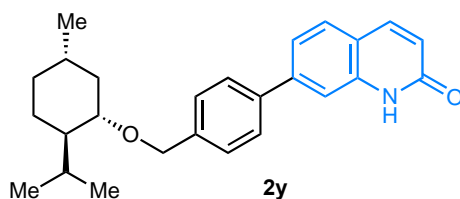

Following the general procedure **B**, **2y** was obtained as white solid.  $^1\text{H NMR}$  (500 MHz, Chloroform-*d*)  $\delta$  12.36 (s, 1H), 7.88 (d,  $J = 9.4$  Hz, 1H), 7.70 – 7.65 (m, 4H), 7.51 (d,  $J = 7.7$  Hz, 3H), 6.78 (d,  $J = 9.4$  Hz, 1H), 4.78 (d,  $J = 11.5$  Hz, 1H), 4.52 (d,  $J = 11.6$  Hz, 1H), 3.27 (td,  $J = 10.5, 4.0$  Hz, 1H), 2.42 – 2.36 (m, 1H), 2.28 (d,  $J = 12.3$  Hz, 1H), 1.82 (s, 1H), 1.74 – 1.68 (m, 2H), 1.38 (t,  $J = 11.3$  Hz, 1H), 1.09 – 0.92 (m, 9H), 0.81 (d,  $J = 6.9$  Hz, 3H).  $^{13}\text{C NMR}$  (126 MHz, Chloroform-*d*)  $\delta$  154.94, 142.61, 139.66, 138.27, 137.92, 127.30, 127.12, 126.37, 121.00, 120.17, 118.03, 113.05, 77.97, 69.02, 47.37, 39.35, 33.58, 30.59, 24.59, 22.30, 21.39, 20.04, 15.15. HRMS(ESI)  $m/z$ : calculated for  $[\text{C}_{26}\text{H}_{31}\text{NO}_2 + \text{H}]^+$  390.2428, found 390.2433.

**6-(4-(((*R*)-2,5,7,8-tetramethyl-2-((4*R*,8*R*)-4,8,12-trimethyltridecyl)chroman-6-yl)oxy)methyl)phenyl)quinolin-2(1*H*)-one (2z)**

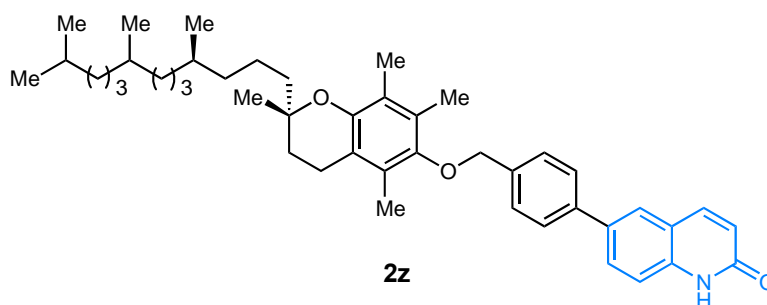

Following the general procedure **B**, **2z** was obtained as white solid.  $^1\text{H NMR}$  (500 MHz, Chloroform-*d*)  $\delta$  11.68 (s, 1H), 7.95 (d,  $J = 9.5$  Hz, 1H), 7.84 (d,  $J = 8.3$  Hz, 2H), 7.71 (d,  $J = 7.9$  Hz, 2H), 7.66 (d,  $J = 8.0$  Hz, 2H), 7.52 (d,  $J = 8.3$  Hz, 1H), 6.82 (d,  $J = 9.5$  Hz, 1H), 4.81 (s, 2H), 2.66 (t,  $J = 6.8$  Hz, 2H), 2.30 (s, 3H), 2.25 (s, 3H), 2.17 (s, 3H), 1.86 (dq,  $J = 20.1, 6.8$  Hz, 2H), 1.63 – 1.56 (m, 3H), 1.50 – 1.43 (m, 4H), 1.31 (s, 10H), 1.23 – 1.09 (m, 8H), 0.92 (d,  $J = 6.4$  Hz, 11H).  $^{13}\text{C NMR}$  (126 MHz, Chloroform-*d*)  $\delta$  147.11, 146.97, 140.15, 138.50, 136.75, 136.35, 134.71, 131.13, 131.05, 130.93, 128.86, 127.54, 127.26, 126.89, 126.06, 124.87, 121.98, 120.81, 119.23, 116.64, 115.60, 73.85, 73.32, 39.05, 38.37, 36.49, 36.46, 36.42, 36.29, 31.80, 31.71, 30.33, 26.98, 23.80, 23.45, 22.89, 21.71, 21.62, 20.04, 19.70, 18.75, 18.67, 11.91, 11.04, 10.83. HRMS(ESI)  $m/z$ :

calculated for  $[C_{45}H_{61}NO_3 + H]^+$  664.4724, found 664.4730.

### General procedure C: Optimized conditions for accessing (*P, Z*)-3

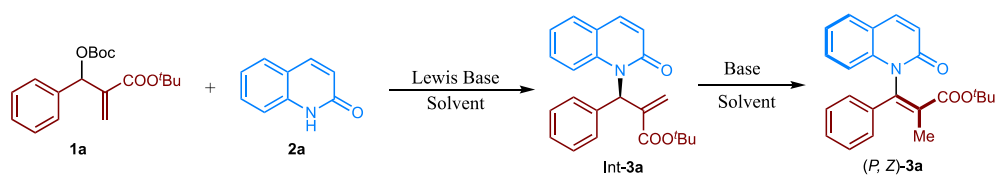

| Entry | Lewis base               | solvent | yield (%) | ee (%) |
|-------|--------------------------|---------|-----------|--------|
| 1     | Quinine                  | Toluene | 69        | 8      |
| 2     | Hydroquinine             | Toluene | 87        | 13     |
| 3     | (DHQD) <sub>2</sub> AQN  | Toluene | 89        | 25     |
| 4     | (DHQD) <sub>2</sub> PHAL | Toluene | 23        | 8      |
| 5     | (DHQD) <sub>2</sub> PYR  | Toluene | 55        | 85     |
| 6     | (DHQD) <sub>2</sub> PYR  | DCE     | 60        | 89     |
| 7     | (DHQD) <sub>2</sub> PYR  | MeCN    | 75        | 90     |
| 8     | (DHQD) <sub>2</sub> PYR  | MTBE    | 61        | 92     |
| 9     | (DHQD) <sub>2</sub> PYR  | DME     | 83        | 94     |

Optimization of the first step conditions: **1a** (0.3 mmol), **2a** (0.1 mmol), Lewis Base (20 mmol%), solvent (1.0 mL), rt, isolated yield, the ee values were calculated by chiral HPLC traces.

| Entry | Base                | solvent | yield (%) | ee (%) | Z/E   |
|-------|---------------------|---------|-----------|--------|-------|
| 1     | NaO <sup>t</sup> Bu | Toluene | 51        | 85     | 2/1   |
| 2     | DBU                 | Toluene | 57        | 73     | 3/1   |
| 3     | PhONa               | Toluene | 94        | 86     | >20/1 |
| 4     | MeONa               | Toluene | 91        | 94     | >20/1 |
| 5     | MeONa               | DCE     | 84        | 87     | 12/1  |
| 6     | MeONa               | THF     | 84        | 94     | 13/1  |
| 7     | MeONa               | Dioxane | 82        | 79     | 6/1   |

Optimization of the second step conditions: Int-3a (0.1 mmol), Base (0.15 mmol), solvent (1.0 mL), rt, isolated yield, the ee values were calculated by chiral HPLC traces. The Z/E ratio of **3a** was calculated by <sup>1</sup>H-NMR.

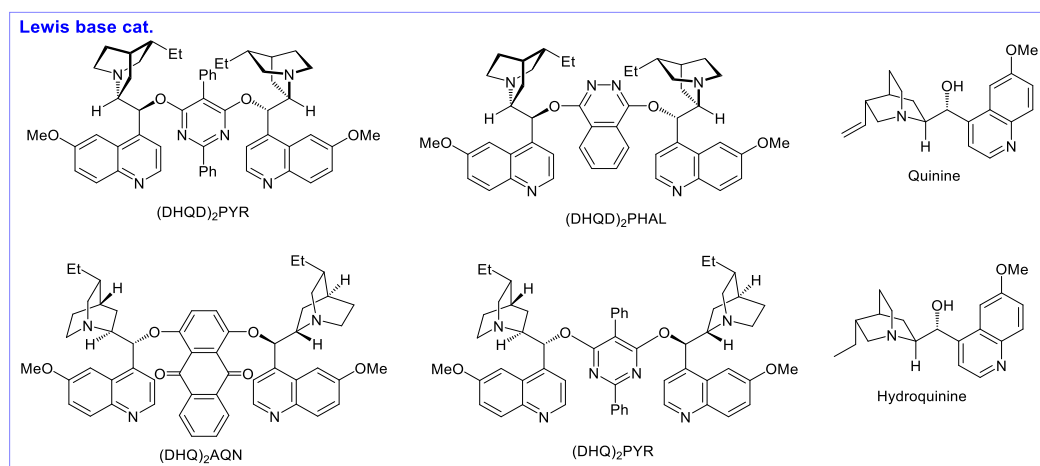

### Supplementary Fig. 2. Optimization of the reaction

Compound **1a** (0.3 mmol), **2a** (0.1 mmol) and the Lewis base catalyst (0.02 mmol) were added to a 2 dram scintillation vial equipped with a magnetic stirring bar. The vial was then charged with solvent (1.0 mL) and stirred at room temperature for several days. The reaction was monitored by TLC analyses. After the reaction completed, the residue was purified directly by column chromatography over silica gel (PE: EA = 10:1 to 6:1) to afford the desired centrally chiral product **Int-3a**. The absolute configuration

of **Int-3a** were confirmed by single-crystal X-ray analysis as shown in Supplementary Table 7 (CCDC 2089101).

Compound **Int-3a** (0.1 mmol) and base (0.15 mmol) were added to a 2 dram scintillation vial equipped with a magnetic stirring bar. The vial was then charged with toluene (1.0 mL) and stirred at room temperature for indicated time. The reaction was monitored by TLC analyses. After the reaction completed, the residue was purified directly by column chromatography over silica gel (PE: EA = 10:1 to 5:1) to afford the desired product (*P, Z*)-**3a**. The *Z/E* ratio was determined by crude <sup>1</sup>H-NMR of the mixture.

### General procedure D: One-pot synthesis of axially chiral products (*P, Z*)-**3**

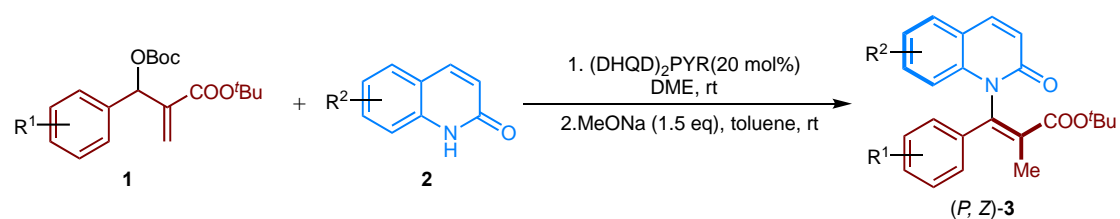

The catalyst (DHQD)<sub>2</sub>PYR (0.06 mmol, 52.8 mg), **1** (0.9 mmol), **2** (0.3 mmol,) were added to a 2 dram scintillation vial equipped with a magnetic stirring bar. The vial was then charged with DME (1.5 mL) and stirred at room temperature for several days. The reaction was monitored by TLC analyses. When the reaction completed, the solvent in the vial was removed by distillation under reduced pressure. Then MeONa (0.45 mmol, 1.5 eq) was added into the vial. The vial was then charged with toluene (1.0 mL) and stirred at room temperature for about 1 h until the full consumption of the intermediate by TLC monitoring. Then the residue was purified directly by column chromatography over silica gel (PE: EA = 10:1 to 5:1) to afford the desired product (*P, Z*)-**3**.

It should be noted that we also tried the reaction of **1a** with 8-bromoquinolin-2(1*H*)-one. However, no desired product **3** was obtained.



## General procedure E: Optimized conditions for accessing (*P, E*)-3

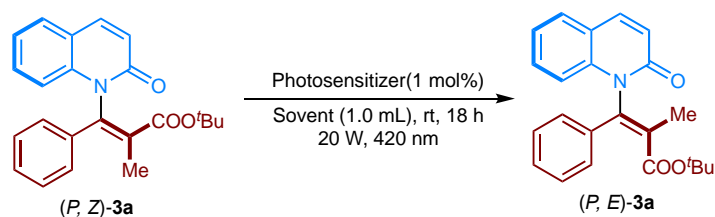

The compound (*P, Z*)-**3a** (0.1 mmol, 1.0 eq) and photosensitizer (1 mol%) were weighed out into a 2 dram scintillation vial. The vial was charged with solvent (1.0 mL) and the reaction was stirred at room temperature under visible light irradiation (420 nm) for 18 h. Then the mixture was concentrated under reduced pressure directly. The residue was dissolved in 0.5 mL  $\text{CDCl}_3$  and then detected by  $^1\text{H-NMR}$  to afford the *E/Z* ratio of **3a**.

## General procedure F: Synthesis of axially chiral products (*P, E*)-3

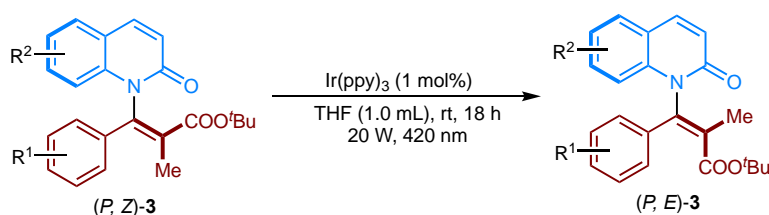

Compound (*P, Z*)-**3** (0.1 mmol, 1.0 eq) and  $\text{Ir(ppy)}_3$  (1 mol%) were weighed out into a 2 dram scintillation vial. The vial was charged with THF (1.0 mL) and the reaction was stirred at room temperature under visible light irradiation (420 nm) for 18 h. Then the mixture was concentrated under reduced pressure and purified directly by column chromatography over silica gel (PE: EA = 50:1 to 10:1) to afford the desired product (*P, E*)-**3**. The *Z/E* ratio was determined by crude  $^1\text{H-NMR}$  of the mixture.

## General procedure G: One-pot synthesis of axially chiral products (*P, E*)-3

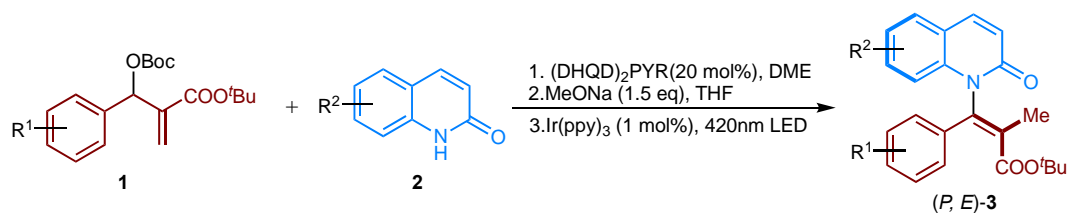

The catalyst (DHQD)<sub>2</sub>PYR (0.04 mmol, 35.2 mg), **1a** (0.6 mmol), **2a/2s** (0.2 mmol) were added to a 2 dram scintillation vial equipped with a magnetic stirring bar. The vial was then charged with DME (1.0 mL) and stirred at room temperature for several days. After completion of the reaction detected by TLC, the solvent in the vial was removed by distillation under reduced pressure. Then MeONa (0.3 mmol, 1.5 eq) was added into the vial. The vial was then charged with THF (1.0 mL) and stirred at room temperature for about 1 h until the full consumption of the intermediate by TLC monitoring. Then Ir(ppy)<sub>3</sub> (1 mol%) was added into the vial and the reaction was stirred at room temperature under visible light irradiation (420 nm) for 18 h. After that, the mixture was concentrated under reduced pressure and purified directly by column chromatography over silica gel (PE: EA = 50:1 to 10:1) to afford the desired product (*P, E*)-**3a**/*(P, E)*-**3s**.

***tert*-butyl (*P, Z*)-2-methyl-3-(2-oxoquinolin-1(2*H*)-yl)-3-phenylacrylate [(*P, Z*)-**3a**]**

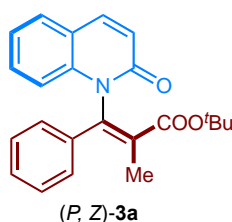

Following the general procedure of **D**, (*P, Z*)-**3a** was obtained as white solid (87% yield). <sup>1</sup>H NMR (500 MHz, Chloroform-*d*) δ 7.71 (d, *J* = 9.5 Hz, 1H), 7.54 (dd, *J* = 7.8, 1.5 Hz, 1H), 7.48 – 7.44 (m, 3H), 7.37 (d, *J* = 8.5 Hz, 1H), 7.34 – 7.29 (m, 3H), 7.18 (td, *J* = 7.5, 1.1 Hz, 1H), 6.69 (d, *J* = 9.5 Hz, 1H), 2.27 (s, 3H), 1.03 (s, 9H). <sup>13</sup>C NMR (126 MHz, Chloroform-*d*) δ 165.76, 160.42, 139.21, 138.77, 136.11, 134.93, 131.59, 129.62, 128.25, 127.84, 127.32, 127.23, 121.42, 121.33, 119.30, 114.78, 80.47, 26.35, 16.51. HRMS(ESI) *m/z*: calculated for [C<sub>23</sub>H<sub>23</sub>NO<sub>3</sub>+H]<sup>+</sup> 362.1751, found 362.1750. HPLC data (Chiralpak OD column, hexane: isopropanol = 95:5, 1.0 mL/min), *tr* = 12.4 min (minor), *tr* = 14.1 min (major), ee = 94%.

***tert*-butyl (*P, E*)-2-methyl-3-(2-oxoquinolin-1(2*H*)-yl)-3-phenylacrylate [(*P, E*)-**3a**]**

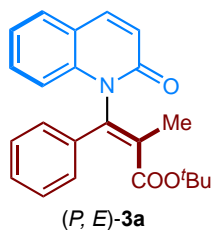

Following the general procedure of **F**, (*P, E*)-**3a** was obtained as white solid (79% yield). *E/Z* = 8/1. <sup>1</sup>H NMR (500 MHz, Chloroform-*d*) δ 7.73 (d, *J* = 9.5 Hz, 1H), 7.58 (dd, *J* = 7.8, 1.5 Hz, 1H), 7.51 (ddd, *J* = 8.6, 7.1, 1.5 Hz, 1H), 7.45 (d, *J* = 8.4 Hz, 1H), 7.42 – 7.40 (m, 2H), 7.27 – 7.22 (m, 4H), 6.69 (d, *J* = 9.5 Hz, 1H), 1.77 (s, 3H), 1.32 (s, 9H). <sup>13</sup>C NMR (126 MHz, Chloroform-*d*) δ 168.20, 160.80, 140.01, 139.11, 137.73, 136.78, 133.71, 131.03, 128.73, 128.68, 128.59, 128.07, 122.71, 122.46, 120.49, 115.23, 82.00, 27.67, 16.48. HRMS(ESI) *m/z*: calculated for [C<sub>23</sub>H<sub>23</sub>NO<sub>3</sub>+H]<sup>+</sup> 362.1751, found 362.1749. HPLC data (Chiralpak OD column, hexane: isopropanol = 95:5, 1.0 mL/min), *tr* = 15.5 min (minor), *tr* = 23.3 min (minor), *ee* = 94%.

**tert-butyl (*P, Z*)-3-(4-bromophenyl)-2-methyl-3-(2-oxoquinolin-1(2*H*)-yl)acrylate [(*P, Z*)-3b]**

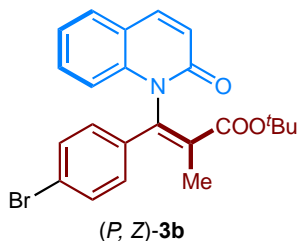

Following the general procedure of **D**, (*P, Z*)-**3b** was obtained as white solid (84% yield). <sup>1</sup>H NMR (500 MHz, Chloroform-*d*) δ 7.72 (d, *J* = 9.5 Hz, 1H), 7.56 (dd, *J* = 7.8, 1.5 Hz, 1H), 7.49 – 7.43 (m, 3H), 7.33 (d, *J* = 8.6 Hz, 3H), 7.22 – 7.18 (m, 1H), 6.68 (d, *J* = 9.5 Hz, 1H), 2.25 (s, 3H), 1.02 (s, 9H). <sup>13</sup>C NMR (126 MHz, Chloroform-*d*) δ 165.43, 160.35, 139.04, 138.91, 135.07, 133.94, 132.19, 130.51, 129.86, 129.73, 127.47, 122.09, 121.51, 121.34, 119.32, 114.51, 80.68, 26.33, 16.47. HRMS(ESI) *m/z*: calculated for [C<sub>23</sub>H<sub>22</sub>BrNO<sub>3</sub>+H]<sup>+</sup> 440.0856, found 440.0849. HPLC data (Chiralpak AD column, hexane: isopropanol = 88:12, 1.0 mL/min), *tr* = 10.4 min (minor), *tr* = 42.8 min (major), *ee* = 91%.

**tert-butyl (*P, E*)-3-(4-bromophenyl)-2-methyl-3-(2-oxoquinolin-1(2*H*)-yl)acrylate**

**[(*P*, *E*)-3b]**

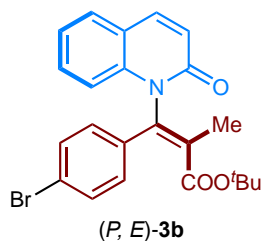

Following the general procedure of **F**, (*P*, *E*)-**3b** was obtained as white solid (86% yield). *E/Z*= 12/1. <sup>1</sup>H NMR (500 MHz, Chloroform-*d*) δ 7.74 (d, *J* = 9.5 Hz, 1H), 7.59 (dd, *J* = 7.8, 1.5 Hz, 1H), 7.53 (ddd, *J* = 8.7, 7.3, 1.5 Hz, 1H), 7.40 – 7.38 (m, 3H), 7.29 – 7.23 (m, 3H), 6.68 (d, *J* = 9.5 Hz, 1H), 1.76 (s, 3H), 1.37 (s, 9H). <sup>13</sup>C NMR (126 MHz, Chloroform-*d*) δ 167.82, 160.78, 140.22, 138.92, 136.69, 135.78, 134.40, 131.28, 131.20, 130.20, 128.92, 122.93, 122.90, 122.34, 120.51, 114.93, 82.36, 27.74, 16.53. HRMS(ESI) *m/z*: calculated for [C<sub>23</sub>H<sub>22</sub>BrNO<sub>3</sub>+H]<sup>+</sup> 440.0856, found 440.0847. HPLC data (Chiralpak AD column, hexane: isopropanol = 95:5, 1.0 mL/min), *tr* = 20.0 min (major), *tr* = 33.0 min (minor), *ee* = 92%.

**tert-butyl (*P*, *Z*)-3-(4-chlorophenyl)-2-methyl-3-(2-oxoquinolin-1(2*H*)-yl)acrylate**  
**[(*P*, *Z*)-3c]**

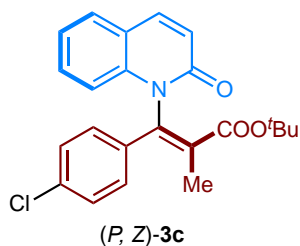

Following the general procedure of **D**, (*P*, *Z*)-**3c** was obtained as white solid (92% yield). <sup>1</sup>H NMR (500 MHz, Chloroform-*d*) δ 7.77 (d, *J* = 9.6 Hz, 1H), 7.61 (d, *J* = 7.7 Hz, 1H), 7.53 (t, *J* = 7.9 Hz, 1H), 7.44 – 7.42 (m, 2H), 7.38 (d, *J* = 8.5 Hz, 1H), 7.34 (d, *J* = 8.6 Hz, 2H), 7.26 (t, *J* = 7.5 Hz, 1H), 6.73 (d, *J* = 9.5 Hz, 1H), 2.30 (s, 3H), 1.07 (s, 9H). <sup>13</sup>C NMR (126 MHz, Chloroform-*d*) δ 164.22, 161.59, 139.62, 138.56, 138.50, 136.03, 133.39, 128.61, 128.12, 127.71, 127.21, 125.46, 125.28, 121.01, 120.34, 116.11, 80.43, 26.71, 20.05. HRMS(ESI) *m/z*: calculated for [C<sub>23</sub>H<sub>22</sub>ClNO<sub>3</sub>+H]<sup>+</sup> 396.1361, found 396.1361. HPLC data (Chiralpak AD column, hexane: isopropanol = 88:12, 1.0 mL/min), *tr* = 9.5 min (minor), *tr* = 37.8 min (major), *ee* = 91%.

***tert*-butyl (*P, E*)-3-(4-chlorophenyl)-2-methyl-3-(2-oxoquinolin-1(2*H*)-yl)acrylate [(*P, E*)-3c]**

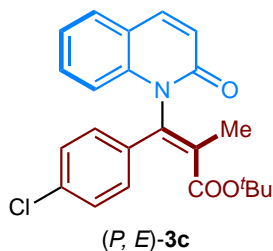

Following the general procedure of **F**, (*P, E*)-**3c** was obtained as white solid (83% yield). *E/Z*= 11/1. <sup>1</sup>H NMR (500 MHz, Chloroform-*d*) δ 7.74 (d, *J* = 9.4 Hz, 1H), 7.60 (dd, *J* = 7.8, 1.5 Hz, 1H), 7.53 (ddd, *J* = 8.6, 7.2, 1.5 Hz, 1H), 7.40 (d, *J* = 8.4 Hz, 1H), 7.35 – 7.33 (m, 2H), 7.27 – 7.22 (m, 3H), 6.68 (d, *J* = 9.5 Hz, 1H), 1.77 (s, 3H), 1.36 (s, 9H). <sup>13</sup>C NMR (126 MHz, Chloroform-*d*) δ 167.84, 160.77, 140.19, 138.94, 136.63, 135.31, 134.63, 134.36, 131.18, 129.94, 128.90, 128.32, 122.90, 122.35, 120.51, 114.94, 82.32, 27.74, 16.50. HRMS(ESI) *m/z*: calculated for [C<sub>23</sub>H<sub>22</sub>ClNO<sub>3</sub>+H]<sup>+</sup> 396.1361, found 396.1361. HPLC data (Chiralpak AD column, hexane: isopropanol = 90:10, 1.0 mL/min), *tr* = 10.2 min (major), *tr* = 14.7 min (minor), *ee* = 91%.

***tert*-butyl (*P, Z*)-2-methyl-3-(2-oxoquinolin-1(2*H*)-yl)-3-(*p*-tolyl)acrylate [(*P, Z*)-3d]**

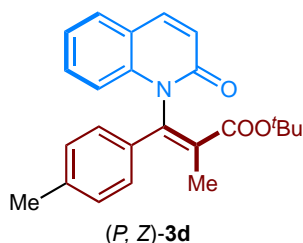

Following the general procedure of **D**, (*P, Z*)-**3d** was obtained as white solid (85% yield). <sup>1</sup>H NMR (500 MHz, Chloroform-*d*) δ 7.70 (d, *J* = 9.5 Hz, 1H), 7.54 (dd, *J* = 7.8, 1.5 Hz, 1H), 7.45 (ddd, *J* = 8.6, 7.2, 1.5 Hz, 1H), 7.34 (dd, *J* = 11.9, 8.3 Hz, 3H), 7.18 (td, *J* = 7.5, 1.1 Hz, 1H), 7.12 (d, *J* = 8.0 Hz, 2H), 6.69 (d, *J* = 9.5 Hz, 1H), 2.31 (s, 3H), 2.28 (s, 3H), 1.02 (s, 9H). <sup>13</sup>C NMR (126 MHz, Chloroform-*d*) δ 165.85, 160.39, 139.26, 138.67, 137.88, 136.28, 132.06, 130.95, 129.57, 128.16, 127.94, 127.26, 121.47, 121.25, 119.28, 114.82, 80.34, 26.36, 20.30, 16.54. HRMS(ESI) *m/z*: calculated for [C<sub>24</sub>H<sub>25</sub>NO<sub>3</sub>+H]<sup>+</sup> 376.1907, found 376.1901. HPLC data (Chiralpak AD column, hexane: isopropanol = 80:20, 1.0 mL/min), *tr* = 6.0 min (minor), *tr* = 14.5 min

(major), ee = 95%.

***tert*-butyl (*P, E*)-2-methyl-3-(2-oxoquinolin-1(2*H*)-yl)-3-(*p*-tolyl)acrylate [(*P, E*)-**3d**]**

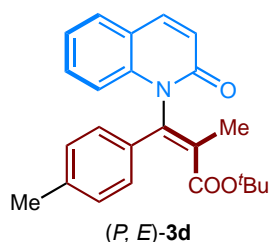

Following the general procedure of **F**, (*P, E*)-**3d** was obtained as white solid (72% yield). *E/Z* = 5/1. <sup>1</sup>H NMR (500 MHz, Chloroform-*d*) δ 7.72 (d, *J* = 9.6 Hz, 1H), 7.57 (dd, *J* = 7.7, 1.5 Hz, 1H), 7.50 (ddd, *J* = 8.7, 7.1, 1.5 Hz, 1H), 7.43 (d, *J* = 8.4 Hz, 1H), 7.29 – 7.26 (m, 2H), 7.24 – 7.21 (m, 1H), 7.06 (d, *J* = 8.0 Hz, 2H), 6.69 (d, *J* = 9.5 Hz, 1H), 2.29 (s, 3H), 1.75 (s, 3H), 1.36 (s, 9H). <sup>13</sup>C NMR (126 MHz, Chloroform-*d*) δ 168.36, 160.79, 139.92, 139.17, 138.63, 137.75, 133.80, 132.97, 130.99, 128.77, 128.65, 128.41, 122.64, 122.49, 120.47, 115.29, 81.92, 27.73, 21.31, 16.47. HRMS(ESI) *m/z*: calculated for [C<sub>24</sub>H<sub>25</sub>NO<sub>3</sub>+H]<sup>+</sup> 376.1907, found 376.1903. HPLC data (Chiralpak AD column, hexane: isopropanol = 90:10, 1.0 mL/min), *t<sub>r</sub>* = 10.8 min (major), *t<sub>r</sub>* = 12.2 min (minor), ee = 94%.

***tert*-butyl (*P, Z*)-3-(4-(*tert*-butyl)phenyl)-2-methyl-3-(2-oxoquinolin-1(2*H*)-yl)acrylate [(*P, Z*)-**3e**]**

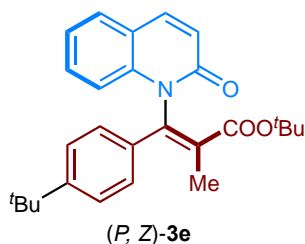

Following the general procedure of **D**, (*P, Z*)-**3e** was obtained as white solid (88% yield). <sup>1</sup>H NMR (500 MHz, Chloroform-*d*) δ 7.76 (d, *J* = 9.5 Hz, 1H), 7.59 (dd, *J* = 7.7, 1.5 Hz, 1H), 7.51 (ddd, *J* = 8.6, 7.1, 1.6 Hz, 1H), 7.43 – 7.40 (m, 3H), 7.37 (d, *J* = 8.6 Hz, 2H), 7.23 (td, *J* = 7.4, 1.1 Hz, 1H), 6.75 (d, *J* = 9.5 Hz, 1H), 2.34 (s, 3H), 1.32 (s, 9H), 1.07 (s, 9H). <sup>13</sup>C NMR (126 MHz, Chloroform-*d*) δ 166.92, 161.44, 151.89, 140.38, 139.71, 137.34, 132.98, 132.00, 130.61, 128.96, 128.29, 125.19, 122.51, 122.28, 120.32, 115.91, 81.38, 34.70, 31.21, 27.41, 17.60. HRMS(ESI) *m/z*: calculated for

$[C_{27}H_{31}NO_3+H]^+$  418.2377, found 418.2376. HPLC data (Chiralpak AD column, hexane: isopropanol = 85:15, 1.0 mL/min),  $t_r$  = 6.6 min (minor),  $t_r$  = 13.1 min (major), ee = 88%.

***tert*-butyl (*P, E*)-3-(4-(*tert*-butyl)phenyl)-2-methyl-3-(2-oxoquinolin-1(2*H*)-yl)acrylate [(*P, E*)-3e]**

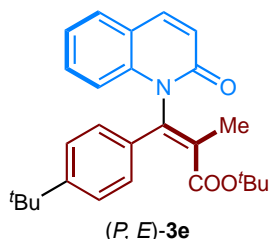

Following the general procedure of **F**, (*P, E*)-**3e** was obtained as white solid (85% yield). *E/Z* = 15/1. <sup>1</sup>H NMR (500 MHz, Chloroform-*d*) δ 7.72 (d, *J* = 9.6 Hz, 1H), 7.57 (dd, *J* = 7.9, 1.5 Hz, 1H), 7.51 (ddd, *J* = 8.6, 7.0, 1.5 Hz, 1H), 7.45 (d, *J* = 7.9 Hz, 1H), 7.34 – 7.32 (m, 2H), 7.28 – 7.25 (m, 2H), 7.24 – 7.21 (m, 1H), 6.69 (d, *J* = 9.5 Hz, 1H), 1.76 (s, 3H), 1.32 (s, 9H), 1.25 (s, 9H). <sup>13</sup>C NMR (126 MHz, Chloroform-*d*) δ 168.35, 160.80, 151.70, 139.95, 139.14, 137.86, 133.80, 133.08, 131.00, 128.68, 128.25, 124.96, 122.66, 122.46, 120.48, 115.30, 81.86, 34.62, 31.25, 27.64, 16.40. HRMS(ESI) *m/z*: calculated for  $[C_{27}H_{31}NO_3+H]^+$  418.2377, found 418.2370. HPLC data (Chiralpak OD column, hexane: isopropanol = 95:5, 1.0 mL/min),  $t_r$  = 15.6 min (minor),  $t_r$  = 18.9 min (major), ee = 89%.

***tert*-butyl (*P, Z*)-3-([1,1'-biphenyl]-4-yl)-2-methyl-3-(2-oxoquinolin-1(2*H*)-yl)acrylate [(*P, Z*)-3f]**

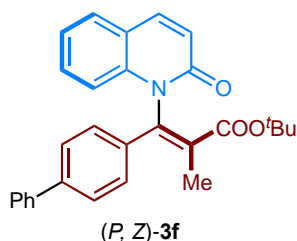

Following the general procedure of **D**, (*P, Z*)-**3f** was obtained as white solid (81% yield). <sup>1</sup>H NMR (500 MHz, Chloroform-*d*) δ 7.79 (d, *J* = 9.5 Hz, 1H), 7.61 (d, *J* = 8.2 Hz, 2H), 7.59 – 7.56 (m, 5H), 7.53 (d, *J* = 7.3 Hz, 1H), 7.46 (t, *J* = 7.2 Hz, 3H), 7.38 (t, *J* = 7.3 Hz, 1H), 7.26 (t, *J* = 7.4 Hz, 1H), 6.77 (d, *J* = 9.6 Hz, 1H), 2.39 (s, 3H), 1.09 (s, 9H).

$^{13}\text{C}$  NMR (126 MHz, Chloroform-*d*)  $\delta$  166.78, 161.48, 141.66, 140.38, 140.35, 139.84, 136.99, 134.93, 132.62, 130.70, 129.73, 128.83, 128.40, 127.63, 127.11, 126.98, 122.51, 122.41, 120.38, 115.83, 81.52, 27.43, 17.65. HRMS(ESI) *m/z*: calculated for  $[\text{C}_{29}\text{H}_{27}\text{NO}_3+\text{H}]^+$  438.2064, found 438.2063. HPLC data (Chiralpak AD column, hexane: isopropanol = 80:20, 1.0 mL/min), *tr* = 7.5min (minor), *tr* = 25.4 min (major), *ee* = 90%.

***tert*-butyl (*P, E*)-3-([1,1'-biphenyl]-4-yl)-2-methyl-3-(2-oxoquinolin-1(2*H*)-yl)acrylate [(*P, E*)-3f]**

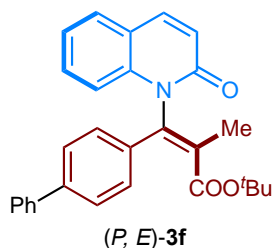

Following the general procedure of **F**, (*P, E*)-**3f** was obtained as white solid (79% yield). *E/Z* = 10/1.  $^1\text{H}$  NMR (500 MHz, Chloroform-*d*)  $\delta$  7.75 (d, *J* = 9.6 Hz, 1H), 7.59 (dd, *J* = 7.8, 1.5 Hz, 1H), 7.53 (dt, *J* = 7.7, 1.8 Hz, 3H), 7.48 (q, *J* = 2.8 Hz, 5H), 7.40 (dd, *J* = 8.4, 6.9 Hz, 2H), 7.34 – 7.30 (m, 1H), 7.26 – 7.23 (m, 1H), 6.71 (d, *J* = 9.5 Hz, 1H), 1.79 (s, 3H), 1.37 (s, 9H).  $^{13}\text{C}$  NMR (126 MHz, Chloroform-*d*)  $\delta$  168.24, 160.87, 141.53, 140.62, 140.10, 139.17, 137.50, 135.71, 133.71, 131.13, 128.98, 128.82, 128.80, 127.53, 127.11, 126.83, 122.80, 122.47, 120.53, 115.22, 82.15, 27.75, 16.57. HRMS(ESI) *m/z*: calculated for  $[\text{C}_{29}\text{H}_{27}\text{NO}_3+\text{H}]^+$  438.2064, found 438.2063. HPLC data (Chiralpak AD column, hexane: isopropanol = 85:15, 1.0 mL/min), *tr* = 10.2min (major), *tr* = 13.0 min (minor), *ee* = 89%.

***tert*-butyl (*P, Z*)-2-methyl-3-(2-oxoquinolin-1(2*H*)-yl)-3-(4-(prop-1-en-2-yl)phenyl)acrylate [(*P, Z*)-3g]**

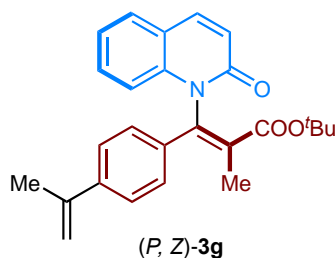

Following the general procedure of **D**, (*P, Z*)-**3g** was obtained as white solid (74%



yield).  $^1\text{H NMR}$  (500 MHz, Chloroform-*d*)  $\delta$  7.64 (d,  $J = 9.4$  Hz, 1H), 7.47 (d,  $J = 7.6$  Hz, 1H), 7.39 (t,  $J = 7.8$  Hz, 1H), 7.33 (s, 4H), 7.28 (d,  $J = 8.9$  Hz, 1H), 7.11 (t,  $J = 7.4$  Hz, 1H), 6.62 (d,  $J = 9.4$  Hz, 1H), 5.28 (s, 1H), 5.00 (s, 1H), 2.22 (s, 3H), 2.02 (s, 3H), 0.95 (s, 9H).  $^{13}\text{C NMR}$  (126 MHz, Chloroform-*d*)  $\delta$  166.79, 161.45, 142.54, 141.63, 140.29, 139.80, 137.00, 134.97, 132.46, 130.65, 129.19, 128.35, 125.36, 122.46, 122.37, 120.35, 115.84, 113.29, 81.48, 27.41, 21.62, 17.58. HRMS(ESI)  $m/z$ : calculated for  $[\text{C}_{26}\text{H}_{27}\text{NO}_3+\text{H}]^+$  402.2064, found 402.2068. HPLC data (Chiralpak IC column, hexane: isopropanol = 80:20, 1.0 mL/min),  $t_r = 23.7$  min (minor),  $t_r = 43.4$  min (major), ee = 90%.

***tert*-butyl (*P*, *E*)-2-methyl-3-(2-oxoquinolin-1(2*H*)-yl)-3-(4-(prop-1-en-2-yl)phenyl)acrylate [(*P*, *E*)-3g]**

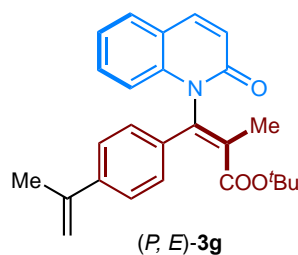

Following the general procedure of **F**, (*P*, *E*)-**3g** was obtained as white solid (64% yield).  $E/Z = 5/1$ .  $^1\text{H NMR}$  (500 MHz, Chloroform-*d*)  $\delta$  7.74 (d,  $J = 9.5$  Hz, 1H), 7.58 (dd,  $J = 7.8, 1.5$  Hz, 1H), 7.51 (ddd,  $J = 8.7, 7.2, 1.5$  Hz, 1H), 7.44 – 7.43 (m, 1H), 7.35 (s, 4H), 7.25 – 7.22 (m, 1H), 6.70 (d,  $J = 9.5$  Hz, 1H), 5.33 – 5.32 (m, 1H), 5.05 (t,  $J = 1.5$  Hz, 1H), 2.09 (d,  $J = 0.8$  Hz, 3H), 1.77 (s, 3H), 1.36 (s, 9H).  $^{13}\text{C NMR}$  (126 MHz, Chloroform-*d*)  $\delta$  168.24, 160.81, 142.74, 141.53, 140.04, 139.13, 137.49, 135.68, 133.45, 131.07, 128.73, 128.39, 125.20, 122.74, 122.44, 120.48, 115.22, 112.95, 82.07, 27.73, 21.71, 16.54. HRMS(ESI)  $m/z$ : calculated for  $[\text{C}_{26}\text{H}_{27}\text{NO}_3+\text{H}]^+$  402.2064, found 402.2061. HPLC data (Chiralpak AD column, hexane: isopropanol = 95:5, 1.0 mL/min),  $t_r = 18.0$  min (major),  $t_r = 23.9$  min (minor), ee = 89%.

***tert*-butyl (*P*, *Z*)-3-(3-chlorophenyl)-2-methyl-3-(2-oxoquinolin-1(2*H*)-yl)acrylate [(*P*, *Z*)-3h]**

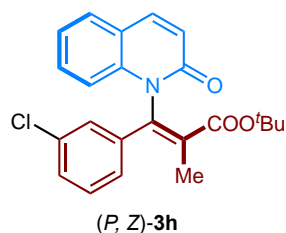

Following the general procedure of **D**, (*P, Z*)-**3h** was obtained as white solid (81% yield). <sup>1</sup>H NMR (500 MHz, Chloroform-*d*) δ 7.78 (d, *J* = 9.5 Hz, 1H), 7.61 (d, *J* = 7.6 Hz, 1H), 7.54 (t, *J* = 7.8 Hz, 1H), 7.47 (s, 1H), 7.39 (t, *J* = 7.3 Hz, 3H), 7.32 (d, *J* = 3.2 Hz, 2H), 7.26 (t, *J* = 7.5 Hz, 1H), 6.74 (d, *J* = 9.5 Hz, 1H), 2.31 (s, 3H), 1.06 (s, 9H). <sup>13</sup>C NMR (126 MHz, Chloroform-*d*) δ 165.39, 160.36, 139.04, 138.97, 136.75, 134.71, 133.19, 132.70, 129.78, 128.54, 128.12, 128.02, 127.49, 126.57, 121.53, 121.32, 119.34, 114.50, 80.74, 26.32, 16.49. HRMS(ESI) *m/z*: calculated for [C<sub>23</sub>H<sub>22</sub>ClNO<sub>3</sub>+H]<sup>+</sup> 396.1361, found 396.1362. HPLC data (Chiralpak AD column, hexane: isopropanol = 90: 10, 1.0 mL/min), *tr* = 9.3 min (minor), *tr* = 23.0 min (major), *ee* = 89%.

***tert*-butyl (*P, E*)-3-(3-chlorophenyl)-2-methyl-3-(2-oxoquinolin-1(2*H*)-yl)acrylate [(*P, E*)-3h]**

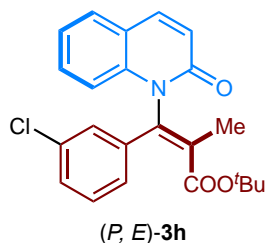

Following the general procedure of **F**, (*P, E*)-**3h** was obtained as white solid (78% yield). *E/Z* = 6/1. <sup>1</sup>H NMR (500 MHz, Chloroform-*d*) δ 7.75 (d, *J* = 9.6 Hz, 1H), 7.60 (dd, *J* = 7.8, 1.5 Hz, 1H), 7.54 (ddd, *J* = 8.6, 7.1, 1.5 Hz, 1H), 7.45 (t, *J* = 2.0 Hz, 1H), 7.40 (d, *J* = 8.4 Hz, 1H), 7.27 – 7.24 (m, 3H), 7.20 – 7.17 (m, 1H), 6.69 (d, *J* = 9.5 Hz, 1H), 1.77 (s, 3H), 1.37 (s, 9H). <sup>13</sup>C NMR (126 MHz, Chloroform-*d*) δ 167.75, 160.78, 140.25, 138.95, 138.55, 136.23, 134.90, 133.94, 131.23, 129.43, 129.43, 128.92, 128.79, 126.51, 122.93, 122.31, 120.51, 114.92, 82.45, 27.71, 16.54. HRMS(ESI) *m/z*: calculated for [C<sub>23</sub>H<sub>22</sub>ClNO<sub>3</sub>+H]<sup>+</sup> 396.1361, found 396.1362. HPLC data (Chiralpak AD column, hexane: isopropanol = 90:10, 1.0 mL/min), *tr* = 9.2 min (major), *tr* = 10.2 min (minor), *ee* = 89%.

***tert*-butyl (*P, Z*)-3-(3-fluorophenyl)-2-methyl-3-(2-oxoquinolin-1(2*H*)-yl)acrylate**  
**[(*P, Z*)-3i]**

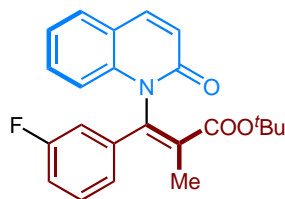

(*P, Z*)-3i

Following the general procedure of **D**, (*P, Z*)-**3i** was obtained as white solid (74% yield). <sup>1</sup>H NMR (500 MHz, Chloroform-*d*) δ 7.73 (d, *J* = 9.6 Hz, 1H), 7.56 (dd, *J* = 7.8, 1.5 Hz, 1H), 7.48 (ddd, *J* = 8.7, 7.2, 1.5 Hz, 1H), 7.34 (d, *J* = 8.5 Hz, 1H), 7.31 – 7.28 (m, 1H), 7.26 – 7.24 (m, 1H), 7.21 (td, *J* = 7.5, 1.0 Hz, 1H), 7.17 – 7.14 (m, 1H), 7.00 (tdd, *J* = 8.3, 2.7, 1.2 Hz, 1H), 6.69 (d, *J* = 9.5 Hz, 1H), 2.27 (s, 3H), 1.02 (s, 9H). <sup>13</sup>C NMR (126 MHz, Chloroform-*d*) δ 165.47, 161.40 (d, *J* = 254.4 Hz), 160.45, 139.08, 138.95, 137.07 (d, *J* = 7.6 Hz), 134.78, 132.59, 129.75, 128.82 (d, *J* = 8.2 Hz), 127.47, 124.10 (d, *J* = 3.1 Hz), 121.43 (d, *J* = 22.5 Hz), 119.34, 115.32, 115.15, 114.90 (d, *J* = 21.2 Hz), 114.55, 80.73, 26.33, 16.46. <sup>19</sup>F NMR (470 MHz, Chloroform-*d*) δ -112.49 (td, *J* = 9.2, 5.8 Hz). HRMS(ESI) *m/z*: calculated for [C<sub>23</sub>H<sub>22</sub>FNO<sub>3</sub>+H]<sup>+</sup> 380.1656, found 380.1660. HPLC data (Chiralpak AD column, hexane: isopropanol = 90:10, 1.0 mL/min), *tr* = 10.0 min (minor), *tr* = 22.9 min (major), ee = 90%.

***tert*-butyl (*P, E*)-3-(3-fluorophenyl)-2-methyl-3-(2-oxoquinolin-1(2*H*)-yl)acrylate**  
**[(*P, E*)-3i]**

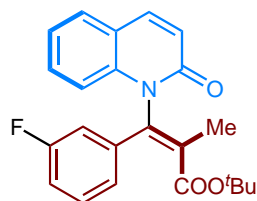

(*P, E*)-3i

Following the general procedure of **F**, (*P, E*)-**3i** was obtained as white solid (74% yield). *E/Z* = 6/1. <sup>1</sup>H NMR (500 MHz, Chloroform-*d*) δ 7.75 (d, *J* = 9.6 Hz, 1H), 7.60 (dd, *J* = 7.8, 1.6 Hz, 1H), 7.53 (ddd, *J* = 8.7, 7.2, 1.5 Hz, 1H), 7.40 (d, *J* = 8.2 Hz, 1H), 7.27 – 7.18 (m, 3H), 7.13 (ddd, *J* = 9.9, 2.6, 1.6 Hz, 1H), 6.98 (tdd, *J* = 8.2, 2.6, 1.3 Hz, 1H), 6.69 (d, *J* = 9.5 Hz, 1H), 1.77 (s, 3H), 1.36 (s, 9H). <sup>13</sup>C NMR (126 MHz, Chloroform-

*d*)  $\delta$  167.86, 162.39 (d,  $J = 246.0$  Hz), 160.81, 140.22, 138.99, 138.82 (d,  $J = 8.0$  Hz), 136.17 (d,  $J = 2.6$  Hz), 134.79, 131.20, 129.63 (d,  $J = 8.3$  Hz), 128.88, 124.32 (d,  $J = 2.9$  Hz), 122.91, 122.33, 115.71 (d,  $J = 5.6$  Hz), 115.54 (d,  $J = 7.2$  Hz), 114.96, 82.39, 27.68, 16.54.  $^{19}\text{F}$  NMR (470 MHz, Chloroform-*d*)  $\delta$  -113.27. HRMS(ESI)  $m/z$ : calculated for  $[\text{C}_{23}\text{H}_{22}\text{FNO}_3+\text{H}]^+$  380.1656, found 380.1652. HPLC data (Chiralpak AD column, hexane: isopropanol = 90:10, 1.0 mL/min),  $t_r = 9.4$  min (major),  $t_r = 10.6$  min (minor), ee = 90%.

***tert*-butyl (*P, Z*)-2-methyl-3-(2-oxoquinolin-1(2*H*)-yl)-3-(*m*-tolyl)acrylate [(*P, Z*)-**3j**]**

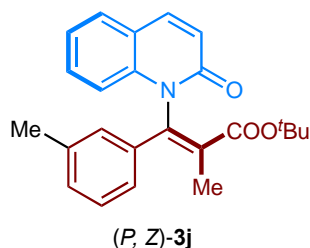

Following the general procedure of **D**, (*P, Z*)-**3j** was obtained as white solid (83% yield).  $^1\text{H}$  NMR (500 MHz, Chloroform-*d*)  $\delta$  7.71 (d,  $J = 9.5$  Hz, 1H), 7.54 (dd,  $J = 7.7, 1.5$  Hz, 1H), 7.46 (ddd,  $J = 8.6, 7.1, 1.5$  Hz, 1H), 7.38 (d,  $J = 8.5$  Hz, 1H), 7.27 – 7.16 (m, 4H), 7.10 (d,  $J = 7.5$  Hz, 1H), 6.69 (d,  $J = 9.5$  Hz, 1H), 2.29 (s, 3H), 2.27 (s, 3H), 1.02 (s, 9H).  $^{13}\text{C}$  NMR (126 MHz, Chloroform-*d*)  $\delta$  165.83, 160.42, 139.27, 138.71, 136.88, 136.30, 134.86, 131.40, 129.59, 128.80, 128.69, 127.28, 127.06, 125.35, 121.46, 121.27, 119.30, 114.85, 80.38, 26.36, 20.46, 16.56. HRMS(ESI)  $m/z$ : calculated for  $[\text{C}_{24}\text{H}_{25}\text{NO}_3+\text{H}]^+$  376.1907, found 376.1911. HPLC data (Chiralpak AD column, hexane: isopropanol = 90:10, 1.0 mL/min),  $t_r = 8.7$  min (minor),  $t_r = 19.4$  min (major), ee = 92 %.

***tert*-butyl (*P, E*)-2-methyl-3-(2-oxoquinolin-1(2*H*)-yl)-3-(*m*-tolyl)acrylate [(*P, E*)-**3j**]**

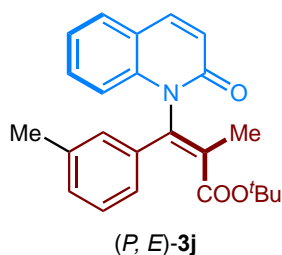

Following the general procedure of **F**, (*P, E*)-**3j** was obtained as white solid (81% yield).  $E/Z = 6/1$ .  $^1\text{H}$  NMR (500 MHz, Chloroform-*d*)  $\delta$  7.74 (d,  $J = 9.5$  Hz, 1H), 7.59 – 7.57

(m, 1H), 7.51 (ddd,  $J = 8.6, 7.1, 1.5$  Hz, 1H), 7.44 (d,  $J = 8.5$  Hz, 1H), 7.26 – 7.22 (m, 2H), 7.15 – 7.12 (m, 2H), 7.08 – 7.07 (m, 1H), 6.70 (d,  $J = 9.5$  Hz, 1H), 2.28 (s, 3H), 1.76 (s, 3H), 1.34 (s, 9H).  $^{13}\text{C}$  NMR (126 MHz, Chloroform-*d*)  $\delta$  168.38, 160.82, 139.97, 139.19, 137.79, 137.54, 136.63, 133.43, 131.03, 129.55, 129.36, 128.69, 128.02, 125.36, 122.67, 122.49, 120.48, 115.30, 81.89, 27.68, 21.41, 16.50. HRMS(ESI)  $m/z$ : calculated for  $[\text{C}_{24}\text{H}_{25}\text{NO}_3+\text{H}]^+$  376.1907, found 376.1905. HPLC data (Chiralpak OD column, hexane: isopropanol = 90:10, 1.0 mL/min),  $t_r = 8.9$  min (minor),  $t_r = 9.7$  min (major), ee = 92 %.

***tert*-butyl (*P, Z*)-2-methyl-3-(naphthalen-2-yl)-3-(2-oxoquinolin-1(2*H*)-yl)acrylate [(*P, Z*)-3k]**

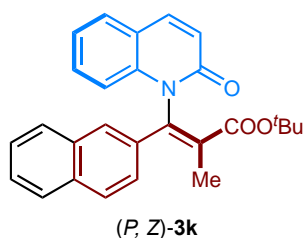

Following the general procedure of **D**, (*P, Z*)-**3k** was obtained as white solid (92% yield).  $^1\text{H}$  NMR (500 MHz, Chloroform-*d*)  $\delta$  7.98 (d,  $J = 1.8$  Hz, 1H), 7.83 (t,  $J = 5.9$  Hz, 3H), 7.79 (d,  $J = 9.5$  Hz, 1H), 7.63 – 7.60 (m, 2H), 7.53 – 7.49 (m, 4H), 7.24 (ddd,  $J = 8.0, 6.3, 2.0$  Hz, 1H), 6.77 (d,  $J = 9.5$  Hz, 1H), 2.40 (s, 3H), 1.10 (s, 9H).  $^{13}\text{C}$  NMR (126 MHz, Chloroform-*d*)  $\delta$  165.76, 160.51, 139.27, 138.85, 136.21, 132.44, 132.19, 131.92, 131.79, 129.66, 128.03, 127.39, 127.36, 126.93, 126.60, 125.83, 125.51, 125.34, 121.43, 121.38, 119.35, 114.86, 80.51, 26.39, 16.63. HRMS(ESI)  $m/z$ : calculated for  $[\text{C}_{27}\text{H}_{25}\text{NO}_3+\text{H}]^+$  412.1907, found 412.1902. HPLC data (Chiralpak AD column, hexane: isopropanol = 70:30, 1.0 mL/min),  $t_r = 5.7$  min (minor),  $t_r = 15.8$  min (major), ee = 94%.

***tert*-butyl (*P, E*)-2-methyl-3-(naphthalen-2-yl)-3-(2-oxoquinolin-1(2*H*)-yl)acrylate [(*P, E*)-3k]**

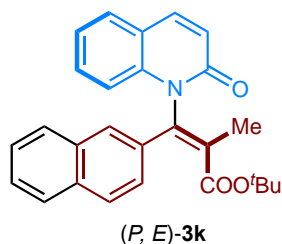

Following the general procedure of **F**, (*P, E*)-**3k** was obtained as white solid (67% yield). *E/Z* = 3/1. <sup>1</sup>H NMR (500 MHz, Chloroform-*d*) δ 7.88 (d, *J* = 1.9 Hz, 1H), 7.74 (ddd, *J* = 11.3, 8.9, 4.8 Hz, 4H), 7.58 (d, *J* = 7.8 Hz, 1H), 7.51 – 7.48 (m, 3H), 7.43 – 7.41 (m, 2H), 7.23 (dt, *J* = 8.0, 4.1 Hz, 1H), 6.72 (d, *J* = 9.5 Hz, 1H), 1.83 (s, 3H), 1.27 (s, 9H). <sup>13</sup>C NMR (126 MHz, Chloroform-*d*) δ 168.33, 160.91, 140.14, 139.17, 137.68, 134.20, 134.09, 133.28, 132.86, 131.10, 128.78, 128.31, 128.06, 127.78, 127.62, 126.54, 126.26, 126.01, 122.79, 122.44, 120.54, 115.30, 82.10, 27.70, 16.65. HRMS(ESI) *m/z*: calculated for [C<sub>27</sub>H<sub>25</sub>NO<sub>3</sub>+H]<sup>+</sup> 412.1907, found 412.1907. HPLC data (Chiralpak AD column, hexane: isopropanol = 90:10, 1.0 mL/min), *tr* = 18.4 min (minor), *tr* = 20.2 min (major), *ee* = 93%.

***tert*-butyl (*P, Z*)-2-methyl-3-(2-oxoquinolin-1(2*H*)-yl)-3-(thiophen-2-yl)acrylate**  
**[*(P, Z)*-3l]**

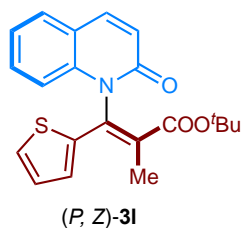

Following the general procedure of **D**, (*P, Z*)-**3l** was obtained as yellow solid (47% yield). <sup>1</sup>H NMR (500 MHz, Chloroform-*d*) δ 7.80 (d, *J* = 9.5 Hz, 1H), 7.61 (d, *J* = 7.7 Hz, 1H), 7.50 – 7.46 (m, 1H), 7.41 – 7.39 (m, 1H), 7.27 – 7.22 (m, 2H), 7.14 (d, *J* = 3.3 Hz, 1H), 7.04 – 7.02 (m, 1H), 6.78 (d, *J* = 9.5 Hz, 1H), 2.50 (s, 3H), 1.08 (s, 9H). <sup>13</sup>C NMR (126 MHz, Chloroform-*d*) δ 166.60, 161.27, 140.02, 138.23, 131.62, 131.39, 130.67, 129.51, 128.29, 128.00, 127.17, 122.48, 122.30, 120.26, 115.78, 81.67, 27.43, 17.83. HRMS(ESI) *m/z*: calculated for [C<sub>21</sub>H<sub>21</sub>NO<sub>3</sub>S + Na]<sup>+</sup> 390.1134, found 390.1125. HPLC data (Chiralpak AD column, hexane: isopropanol = 90:10, 1.0 mL/min), *tr* = 12.4 min (minor), *tr* = 29.8 min (major), *ee* = 89%.

***tert*-butyl (*P, E*)-2-methyl-3-(2-oxoquinolin-1(2*H*)-yl)-3-(thiophen-2-yl)acrylate [(*P, E*)-3l]**

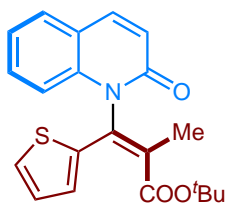

Following the general procedure of **F**, (*P, E*)-**3l** was obtained as white solid (65% yield). *E/Z* = 5/1. <sup>1</sup>H NMR (500 MHz, Chloroform-*d*) δ 7.74 (d, *J* = 9.6 Hz, 1H), 7.58 (dd, *J* = 7.9, 1.5 Hz, 1H), 7.51 (ddd, *J* = 8.6, 7.2, 1.5 Hz, 1H), 7.39 (d, *J* = 8.5 Hz, 1H), 7.25 – 7.22 (m, 2H), 7.15 (dd, *J* = 3.7, 1.2 Hz, 1H), 6.91 (dd, *J* = 5.1, 3.7 Hz, 1H), 6.72 (d, *J* = 9.6 Hz, 1H), 1.75 (s, 3H), 1.44 (s, 9H). <sup>13</sup>C NMR (126 MHz, Chloroform-*d*) δ 167.94, 160.61, 140.18, 138.63, 137.81, 134.22, 131.09, 130.42, 128.75, 128.52, 127.00, 126.56, 122.85, 122.23, 120.49, 114.99, 82.44, 27.84, 16.39. HRMS(ESI) *m/z*: calculated for [C<sub>21</sub>H<sub>21</sub>NO<sub>3</sub>S + H]<sup>+</sup> 368.1315, found 368.1317. HPLC data (Chiralpak OD column, hexane: isopropanol = 95:5, 1.0 mL/min), *tr* = 22.2 min (minor), *tr* = 30.5 min (major), *ee* = 89%.

***tert*-butyl (*P, Z*)-3-(benzo[*b*]thiophen-2-yl)-2-methyl-3-(2-oxoquinolin-1(2*H*)-yl)acrylate [(*P, Z*)-3m]**

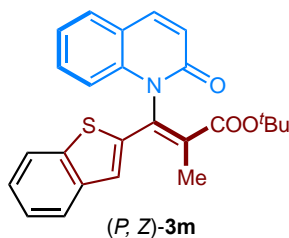

Following the general procedure of **D**, (*P, Z*)-**3m** was obtained as yellow solid (56% yield). <sup>1</sup>H NMR (500 MHz, Chloroform-*d*) δ 7.77 (d, *J* = 9.6 Hz, 1H), 7.74 – 7.72 (m, 1H), 7.70 – 7.68 (m, 1H), 7.57 (dd, *J* = 7.8, 1.5 Hz, 1H), 7.45 (ddd, *J* = 8.6, 7.2, 1.5 Hz, 1H), 7.36 (s, 1H), 7.32 – 7.28 (m, 3H), 7.20 (td, *J* = 7.5, 1.1 Hz, 1H), 6.75 (d, *J* = 9.6 Hz, 1H), 2.52 (s, 3H), 1.05 (s, 9H). <sup>13</sup>C NMR (126 MHz, Chloroform-*d*) δ 165.32, 160.24, 139.35, 139.05, 138.91, 137.88, 137.06, 132.83, 130.46, 129.67, 127.34, 125.33, 124.28, 123.57, 123.17, 121.53, 121.24, 120.97, 119.26, 114.71, 80.85, 26.39,

16.76. HRMS(ESI)  $m/z$ : calculated for  $[C_{25}H_{23}NO_3S + H]^+$  418.1471, found 418.1469. HPLC data (Chiralpak AD column, hexane: isopropanol = 85:15, 1.0 mL/min),  $t_r$  = 17.2 min (minor),  $t_r$  = 31.8 min (major), ee = 91%.

***tert*-butyl (*P, E*)-3-(benzo[*b*]thiophen-2-yl)-2-methyl-3-(2-oxoquinolin-1(2*H*)-yl)acrylate [(*P, E*)-3m]**

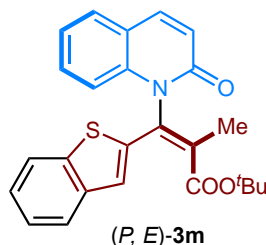

Following the general procedure of **F**, (*P, E*)-**3m** was obtained as white solid (61% yield).  $E/Z$  = 4/1.  $^1H$  NMR (500 MHz, Chloroform-*d*)  $\delta$  7.76 (d,  $J$  = 9.6 Hz, 1H), 7.67 (ddd,  $J$  = 13.0, 6.7, 2.5 Hz, 2H), 7.60 – 7.58 (m, 1H), 7.54 – 7.51 (m, 1H), 7.43 (d,  $J$  = 8.4 Hz, 1H), 7.39 (s, 1H), 7.30 – 7.23 (m, 3H), 6.74 (d,  $J$  = 9.5 Hz, 1H), 1.81 (s, 3H), 1.41 (s, 9H).  $^{13}C$  NMR (126 MHz, Chloroform-*d*)  $\delta$  167.77, 160.69, 140.30, 138.89, 138.65, 138.06, 135.97, 131.15, 130.50, 128.83, 125.38, 124.99, 124.99, 124.43, 123.87, 122.96, 122.21, 122.06, 120.53, 114.95, 82.71, 27.82, 16.49. HRMS(ESI)  $m/z$ : calculated for  $[C_{25}H_{23}NO_3S + H]^+$  418.1471, found 418.1472. HPLC data (Chiralpak OD column, hexane: isopropanol = 90:10, 1.0 mL/min),  $t_r$  = 12.6 min (minor),  $t_r$  = 25.1 min (major), ee = 91%.

***tert*-butyl (*P, Z*)-2-methyl-3-(4-methyl-2-oxoquinolin-1(2*H*)-yl)-3-phenylacrylate [(*P, Z*)-3n]**

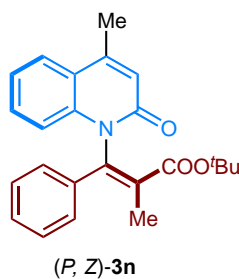

Following the general procedure of **D**, (*P, Z*)-**3n** was obtained as white solid (78% yield).  $^1H$  NMR (500 MHz, Chloroform-*d*)  $\delta$  7.68 (dd,  $J$  = 8.1, 1.4 Hz, 1H), 7.45 (dt,  $J$  = 7.9, 1.7 Hz, 3H), 7.38 (dd,  $J$  = 8.5, 1.1 Hz, 1H), 7.31 (s, 1H), 7.30 – 7.27 (m, 2H), 7.21 (ddd,  $J$  = 8.2, 7.1, 1.2 Hz, 1H), 6.59 (d,  $J$  = 1.3 Hz, 1H), 2.48 (s, 3H), 2.27 (s, 3H),



1.02 (s, 9H).  $^{13}\text{C}$  NMR (126 MHz, Chloroform-*d*)  $\delta$  165.74, 160.13, 146.23, 138.91, 136.23, 135.16, 131.58, 129.37, 128.26, 127.73, 127.18, 123.78, 121.11, 120.65, 120.01, 115.10, 80.34, 26.34, 18.05, 16.47. HRMS(ESI) *m/z*: calculated for  $[\text{C}_{24}\text{H}_{25}\text{NO}_3+\text{H}]^+$  376.1907, found 376.1913. HPLC data (Chiralpak AD column, hexane: isopropanol = 80:20, 1.0 mL/min), *tr* = 5.6 min (minor), *tr* = 13.1 min (major), *ee* = 95%.

***tert*-butyl (*P, E*)-2-methyl-3-(4-methyl-2-oxoquinolin-1(2*H*)-yl)-3-phenylacrylate [(*P, E*)-**3n**]**

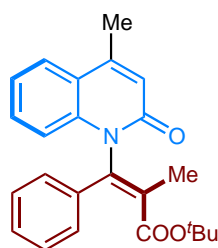

(*P, E*)-**3n**

Following the general procedure of **F**, (*P, E*)-**3n** was obtained as white solid (80% yield). *E/Z* = 9/1.  $^1\text{H}$  NMR (500 MHz, Chloroform-*d*)  $\delta$  7.71 (dd, *J* = 8.1, 1.4 Hz, 1H), 7.52 – 7.49 (m, 1H), 7.45 (dd, *J* = 8.4, 1.3 Hz, 1H), 7.41 – 7.39 (m, 2H), 7.27 – 7.24 (m, 4H), 6.59 (d, *J* = 1.3 Hz, 1H), 2.48 (s, 3H), 1.77 (s, 3H), 1.32 (s, 9H).  $^{13}\text{C}$  NMR (126 MHz, Chloroform-*d*)  $\delta$  168.28, 160.55, 147.65, 138.75, 137.78, 136.94, 133.71, 130.85, 128.60, 128.58, 128.04, 125.26, 122.54, 121.70, 121.22, 115.50, 81.94, 27.66, 19.18, 16.50. HRMS(ESI) *m/z*: calculated for  $[\text{C}_{24}\text{H}_{25}\text{NO}_3+\text{H}]^+$  376.1907, found 376.1904. HPLC data (Chiralpak AD column, hexane: isopropanol = 95:5, 1.0 mL/min), *tr* = 19.6 min (major), *tr* = 25.4 min (minor), *ee* = 95%.

***tert*-butyl (*P, Z*)-2-methyl-3-(2-oxo-4-((*p*-tolylthio)methyl)quinolin-1(2*H*)-yl)-3-phenylacrylate [(*P, Z*)-**3o**]**

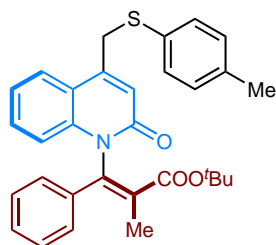

(*P, Z*)-**3o**

Following the general procedure of **D**, (*P, Z*)-**3o** was obtained as yellow solid (74% yield).  $^1\text{H}$  NMR (500 MHz, Chloroform-*d*)  $\delta$  7.86 (d, *J* = 8.0 Hz, 1H), 7.53 (t, *J* = 7.9

Hz, 1H), 7.46 (t,  $J = 7.2$  Hz, 3H), 7.37 (q,  $J = 6.9$  Hz, 3H), 7.29 (t,  $J = 6.7$  Hz, 3H), 7.13 (d,  $J = 7.6$  Hz, 2H), 6.58 (s, 1H), 4.23 (s, 2H), 2.36 (s, 3H), 2.32 (s, 3H), 1.07 (s, 9H).  $^{13}\text{C}$  NMR (126 MHz, Chloroform- $d$ )  $\delta$  166.71, 160.76, 145.99, 140.37, 137.78, 136.92, 135.98, 132.86, 131.83, 131.15, 130.59, 129.97, 129.30, 128.85, 128.25, 124.99, 122.24, 122.10, 119.20, 116.53, 81.47, 37.34, 27.46, 21.14, 17.53. HRMS(ESI)  $m/z$ : calculated for  $[\text{C}_{31}\text{H}_{31}\text{NO}_3\text{S} + \text{H}]^+$  498.2097, found 498.2105. HPLC data (Chiralpak AD column, hexane: isopropanol = 70:30, 1.0 mL/min),  $t_r = 5.8$  min (minor),  $t_r = 28.4$  min (major), ee = 95%.

***tert*-butyl (*P*, *E*)-2-methyl-3-(2-oxo-4-((*p*-tolylthio)methyl)quinolin-1(2*H*)-yl)-3-phenylacrylate [(*P*, *E*)-3o]**

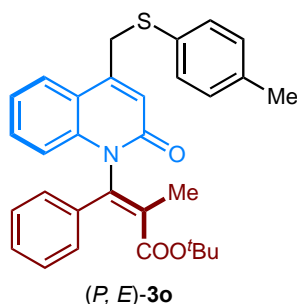

Following the general procedure of **F**, (*P*, *E*)-**3o** was obtained as white solid (69% yield).  $E/Z = 6/1$ .  $^1\text{H}$  NMR (500 MHz, Chloroform- $d$ )  $\delta$  7.86 (d,  $J = 8.0$  Hz, 1H), 7.52 (t,  $J = 7.6$  Hz, 1H), 7.45 (d,  $J = 8.4$  Hz, 1H), 7.37 (dd,  $J = 7.3, 2.4$  Hz, 2H), 7.26 (q,  $J = 4.5$  Hz, 4H), 7.19 (d,  $J = 7.9$  Hz, 2H), 7.05 (d,  $J = 7.8$  Hz, 2H), 6.37 (s, 1H), 4.15 (s, 2H), 2.30 (s, 3H), 1.74 (s, 3H), 1.32 (s, 9H).  $^{13}\text{C}$  NMR (126 MHz, Chloroform- $d$ )  $\delta$  168.23, 160.05, 146.16, 139.24, 138.25, 137.61, 136.72, 133.73, 132.79, 131.05, 130.42, 129.96, 128.70, 128.55, 128.08, 125.47, 122.62, 122.14, 119.22, 115.79, 82.06, 37.63, 27.67, 21.19, 16.47. HRMS(ESI)  $m/z$ : calculated for  $[\text{C}_{31}\text{H}_{31}\text{NO}_3\text{S} + \text{H}]^+$  498.2097, found 498.2093. HPLC data (Chiralpak AD column, hexane: isopropanol = 85:15, 1.0 mL/min),  $t_r = 6.9$  min (major),  $t_r = 7.6$  min (minor), ee = 89%.

***tert*-butyl (*P*, *Z*)-3-(4-(benzyloxy)-2-oxoquinolin-1(2*H*)-yl)-2-methyl-3-phenylacrylate [(*P*, *Z*)-3p]**

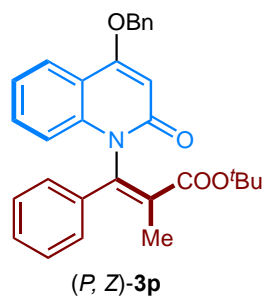

Following the general procedure of **D**, (*P, Z*)-**3p** was obtained as white solid (79% yield). <sup>1</sup>H NMR (500 MHz, Chloroform-*d*) δ 8.01 (dd, *J* = 8.1, 1.6 Hz, 1H), 7.49 – 7.41 (m, 7H), 7.39 – 7.37 (m, 1H), 7.35 – 7.28 (m, 4H), 7.17 (ddd, *J* = 8.1, 7.1, 1.1 Hz, 1H), 6.10 (s, 1H), 5.18 (s, 2H), 2.27 (s, 3H), 1.03 (s, 9H). <sup>13</sup>C NMR (126 MHz, Chloroform-*d*) δ 166.90, 162.83, 162.25, 139.89, 137.12, 136.30, 135.34, 132.83, 131.22, 129.29, 128.80, 128.77, 128.54, 128.23, 127.62, 123.22, 121.95, 116.23, 115.78, 98.05, 81.39, 70.54, 27.45, 17.56. HRMS(ESI) *m/z*: calculated for [C<sub>30</sub>H<sub>29</sub>NO<sub>4</sub>+ Na]<sup>+</sup> 490.1989, found 490.1980. HPLC data (Chiralpak IA column, hexane: isopropanol = 85:15, 1.0 mL/min), *t<sub>r</sub>* = 9.5 min (minor), *t<sub>r</sub>* = 25.0 min (major), ee = 94%.

**tert-butyl (*P, E*)-3-(4-(benzyloxy)-2-oxoquinolin-1(2*H*)-yl)-2-methyl-3-phenylacrylate [(*P, E*)-3p]**

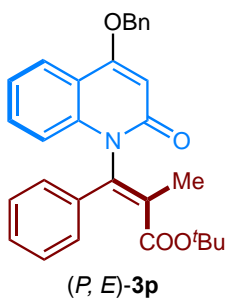

Following the general procedure of **F**, (*P, E*)-**3p** was obtained as white solid (82% yield). *E/Z* = 8/1. <sup>1</sup>H NMR (500 MHz, Chloroform-*d*) δ 8.03 (dd, *J* = 8.0, 1.5 Hz, 1H), 7.52 (ddd, *J* = 8.7, 7.1, 1.5 Hz, 1H), 7.49 – 7.47 (m, 2H), 7.45 – 7.37 (m, 6H), 7.27 – 7.24 (m, 3H), 7.23 – 7.20 (m, 1H), 6.12 (s, 1H), 5.20 – 5.14 (m, 2H), 1.79 (s, 3H), 1.33 (s, 9H). <sup>13</sup>C NMR (126 MHz, Chloroform-*d*) δ 168.33, 162.45, 162.25, 138.73, 137.68, 137.06, 135.25, 133.92, 131.66, 128.84, 128.63, 128.58, 128.55, 128.04, 127.81, 123.65, 122.31, 115.14, 97.91, 81.95, 70.72, 27.68, 16.52. HRMS(ESI) *m/z*: calculated for [C<sub>30</sub>H<sub>29</sub>NO<sub>4</sub>+ H]<sup>+</sup> 468.2169, found 468.2165. HPLC data (Chiralpak AD column,

hexane: isopropanol = 90:10, 1.0 mL/min),  $t_r = 15.4$  min (major),  $t_r = 29.7$  min (minor),  $ee = 94\%$ .

***tert*-butyl (*P, Z*)-2-methyl-3-(2-oxo-4-(piperidin-1-yl)quinolin-1(2*H*)-yl)-3-phenylacrylate [(*P, Z*)-3q]**

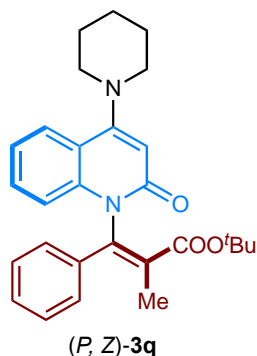

Following the general procedure of **D**, (*P, Z*)-**3q** was obtained as white solid (65% yield). <sup>1</sup>H NMR (500 MHz, Chloroform-*d*)  $\delta$  7.99 (d,  $J = 8.1$  Hz, 1H), 7.50 (d,  $J = 7.0$  Hz, 3H), 7.44 (d,  $J = 8.6$  Hz, 1H), 7.35 (d,  $J = 8.2$  Hz, 3H), 7.25 (d,  $J = 7.8$  Hz, 1H), 6.84 (s, 1H), 3.90 (q,  $J = 14.7$  Hz, 2H), 2.71 (s, 4H), 2.32 (s, 3H), 1.87 (s, 4H), 1.07 (s, 9H). <sup>13</sup>C NMR (126 MHz, Chloroform-*d*)  $\delta$  166.85, 161.41, 148.12, 140.10, 137.12, 136.11, 132.74, 130.27, 129.33, 128.79, 128.23, 125.05, 122.12, 121.21, 120.09, 116.15, 81.38, 57.55, 54.53, 27.41, 23.74, 17.54. HRMS(ESI)  $m/z$ : calculated for [C<sub>28</sub>H<sub>32</sub>N<sub>2</sub>O<sub>3</sub>+H]<sup>+</sup> 445.2486, found 445.2482. HPLC data (Chiralpak AD column, hexane: isopropanol = 70:30, 1.0 mL/min),  $t_r = 5.5$  min (minor),  $t_r = 21.4$  min (major),  $ee = 96\%$ .

***tert*-butyl (*P, E*)-2-methyl-3-(2-oxo-4-(piperidin-1-yl)quinolin-1(2*H*)-yl)-3-phenylacrylate [(*P, E*)-3q]**

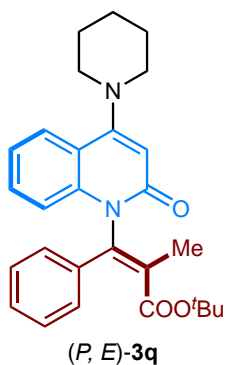

Following the general procedure of **F**, (*P, E*)-**3q** was obtained as white solid (69%

yield). *E/Z* = 10/1.  $^1\text{H NMR}$  (500 MHz, Chloroform-*d*)  $\delta$  7.97 (dd,  $J$  = 8.1, 1.5 Hz, 1H), 7.47 (dtd,  $J$  = 16.7, 8.4, 1.4 Hz, 2H), 7.42 – 7.40 (m, 2H), 7.26 – 7.23 (m, 4H), 6.77 (s, 1H), 3.85 – 3.78 (m, 2H), 2.61 (qd,  $J$  = 6.1, 5.6, 3.3 Hz, 4H), 1.80 (p,  $J$  = 3.4 Hz, 4H), 1.77 (s, 3H), 1.32 (s, 9H).  $^{13}\text{C NMR}$  (126 MHz, Chloroform-*d*)  $\delta$  168.24, 160.74, 148.35, 138.99, 137.84, 136.92, 133.72, 130.70, 128.63, 128.59, 128.02, 125.48, 122.48, 121.25, 120.24, 115.45, 81.95, 57.56, 54.60, 27.66, 23.74, 16.49. HRMS(ESI) *m/z*: calculated for  $[\text{C}_{28}\text{H}_{32}\text{N}_2\text{O}_3+\text{H}]^+$  445.2486, found 445.2466. HPLC data (Chiralpak AD column, hexane: isopropanol = 90:10, 1.0 mL/min), *tr* = 11.0 min (major), *tr* = 12.3 min (minor), *ee* = 95%.

**methyl (*P, Z*)-1-(3-(*tert*-butoxy)-2-methyl-3-oxo-1-phenylprop-1-en-1-yl)-2-oxo-1,2-dihydroquinoline-4-carboxylate [(*P, Z*)-**3r**]**

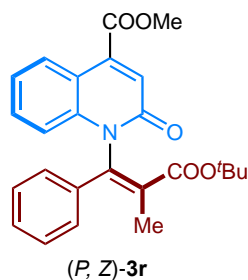

Following the general procedure of **D**, (*P, Z*)-**3r** was obtained as white solid (74% yield).  $^1\text{H NMR}$  (500 MHz, Chloroform-*d*)  $\delta$  8.30 (dd,  $J$  = 8.2, 1.5 Hz, 1H), 7.51 (ddd,  $J$  = 8.6, 7.1, 1.5 Hz, 1H), 7.45 – 7.42 (m, 3H), 7.35 – 7.30 (m, 3H), 7.26 – 7.24 (m, 1H), 7.18 (s, 1H), 3.99 (s, 3H), 2.28 (s, 3H), 1.03 (s, 9H).  $^{13}\text{C NMR}$  (126 MHz, Chloroform-*d*)  $\delta$  165.40, 164.78, 159.36, 139.57, 138.39, 135.87, 134.51, 131.86, 130.15, 128.22, 128.03, 127.32, 125.79, 123.90, 121.89, 116.10, 115.18, 80.69, 51.93, 26.38, 16.52. HRMS(ESI) *m/z*: calculated for  $[\text{C}_{25}\text{H}_{25}\text{NO}_5+\text{H}]^+$  420.1805, found 420.1812. HPLC data (Chiralpak AD column, hexane: isopropanol = 70:30, 1.0 mL/min), *tr* = 4.9 min (minor), *tr* = 27.9 min (major), *ee* = 92%.

**methyl (*P, E*)-1-(3-(*tert*-butoxy)-2-methyl-3-oxo-1-phenylprop-1-en-1-yl)-2-oxo-1,2-dihydroquinoline-4-carboxylate [(*P, E*)-**3r**]**

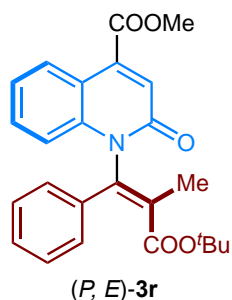

Following the general procedure of **F**, (*P, E*)-**3r** was obtained as white solid (74% yield). *E/Z*= 8/1. <sup>1</sup>H NMR (500 MHz, Chloroform-*d*) δ 8.33 (dd, *J* = 8.2, 1.4 Hz, 1H), 7.56 (ddd, *J* = 8.5, 7.0, 1.5 Hz, 1H), 7.51 (dd, *J* = 8.6, 1.3 Hz, 1H), 7.39 (dd, *J* = 7.5, 2.0 Hz, 2H), 7.31 – 7.25 (m, 4H), 7.19 (s, 1H), 4.00 (s, 3H), 1.77 (s, 3H), 1.33 (s, 9H). <sup>13</sup>C NMR (126 MHz, Chloroform-*d*) δ 167.99, 165.77, 159.73, 139.60, 139.48, 137.28, 136.32, 134.02, 131.61, 128.87, 128.55, 128.15, 127.21, 125.03, 123.30, 117.30, 115.62, 82.18, 52.99, 27.66, 16.51. HRMS(ESI) *m/z*: calculated for [C<sub>25</sub>H<sub>25</sub>NO<sub>5</sub>+H]<sup>+</sup> 420.1805, found 420.1801. HPLC data (Chiralpak AD column, hexane: isopropanol = 95:5, 1.0 mL/min), *tr* = 18.2 min (major), *tr* = 28.4 min (minor), *ee* = 26%.

**tert-butyl (P, Z)-3-(5-bromo-2-oxoquinolin-1(2H)-yl)-2-methyl-3-phenylacrylate**  
**[(P, Z)-3s]**

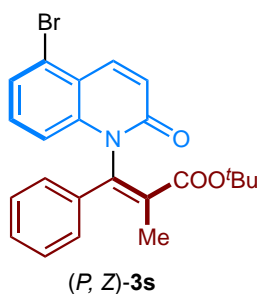

Following the general procedure of **D**, (*P, Z*)-**3s** was obtained as white solid (84% yield). <sup>1</sup>H NMR (500 MHz, Chloroform-*d*) δ 8.21 (d, *J* = 9.9 Hz, 1H), 7.48 – 7.47 (m, 3H), 7.41 – 7.37 (m, 2H), 7.35 (d, *J* = 7.3 Hz, 2H), 7.32 (d, *J* = 7.4 Hz, 1H), 6.82 (d, *J* = 9.9 Hz, 1H), 2.32 (s, 3H), 1.12 (s, 9H). <sup>13</sup>C NMR (126 MHz, Chloroform-*d*) δ 166.54, 160.95, 141.42, 138.40, 136.82, 135.61, 133.09, 130.92, 129.25, 129.04, 128.37, 126.54, 123.60, 123.22, 119.42, 115.67, 81.69, 27.49, 17.57. HRMS(ESI) *m/z*: calculated for [C<sub>23</sub>H<sub>22</sub>BrNO<sub>3</sub>+H]<sup>+</sup> 440.0856, found 440.0846. HPLC data (Chiralpak AD column, hexane: isopropanol = 85:15, 1.0 mL/min), *tr* = 7.2 min (minor), *tr* = 14.4

min (major), ee = 96%.

**tert-butyl (*P, E*)-3-(5-bromo-2-oxoquinolin-1(2*H*)-yl)-2-methyl-3-phenylacrylate**  
**[(*P, E*)-3s]**

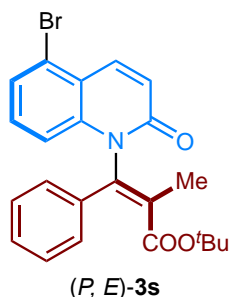

Following the general procedure of **F**, (*P, E*)-**3s** was obtained as white solid (81% yield). *E/Z* = 7/1. <sup>1</sup>H NMR (500 MHz, Chloroform-*d*) δ 8.18 (d, *J* = 9.9 Hz, 1H), 7.48 (dd, *J* = 7.8, 1.1 Hz, 1H), 7.42 (d, *J* = 8.5 Hz, 1H), 7.39 – 7.37 (m, 2H), 7.35 – 7.32 (m, 1H), 7.28 – 7.25 (m, 3H), 6.78 (d, *J* = 9.9 Hz, 1H), 1.77 (s, 3H), 1.33 (s, 9H). <sup>13</sup>C NMR (126 MHz, Chloroform-*d*) δ 168.02, 160.26, 140.33, 138.62, 137.40, 136.40, 134.03, 131.41, 128.85, 128.52, 128.16, 126.97, 123.67, 123.60, 119.61, 114.92, 82.18, 27.66, 16.49. HRMS(ESI) *m/z*: calculated for [C<sub>23</sub>H<sub>22</sub>BrNO<sub>3</sub>+H]<sup>+</sup> 440.0856, found 440.0851. HPLC data (Chiralpak AD column, hexane: isopropanol = 95:5, 1.0 mL/min), *tr* = 17.6 min (major), *tr* = 19.6 min (minor), ee = 97%.

**tert-butyl (*P, Z*)-3-(6-bromo-2-oxoquinolin-1(2*H*)-yl)-2-methyl-3-phenylacrylate**  
**[(*P, Z*)-3t]**

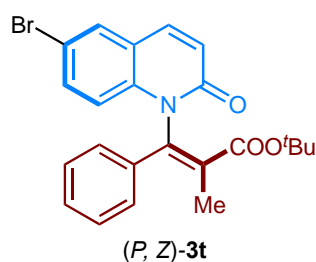

Following the general procedure of **D**, (*P, Z*)-**3t** was obtained as white solid (78% yield). <sup>1</sup>H NMR (500 MHz, Chloroform-*d*) δ 7.60 (d, *J* = 2.2 Hz, 1H), 7.55 (d, *J* = 9.5 Hz, 1H), 7.45 (dd, *J* = 9.0, 2.2 Hz, 1H), 7.34 (d, *J* = 6.7 Hz, 2H), 7.24 (q, *J* = 6.5, 6.0 Hz, 3H), 7.19 – 7.16 (m, 1H), 6.65 (d, *J* = 9.5 Hz, 1H), 2.20 (s, 3H), 1.01 (s, 9H). <sup>13</sup>C NMR (126 MHz, Chloroform-*d*) δ 166.58, 160.99, 139.15, 138.51, 136.50, 135.56, 133.29, 133.15,

130.45, 129.22, 129.06, 128.39, 123.70, 121.76, 117.70, 115.05, 81.67, 27.51, 17.54.  
HRMS(ESI)  $m/z$ : calculated for  $[C_{23}H_{22}BrNO_3+Na]^+$  462.0675, found 462.0672.  
HPLC data (Chiralpak AD column, hexane: isopropanol = 90:10, 1.0 mL/min),  $t_r$  = 9.6 min (minor),  $t_r$  = 15.8 min (major), ee = 96%.

***tert*-butyl (*P, E*)-3-(6-bromo-2-oxoquinolin-1(2*H*)-yl)-2-methyl-3-phenylacrylate [(*P, E*)-3t]**

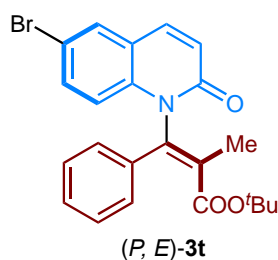

Following the general procedure of **F**, (*P, E*)-3t was obtained as white solid (72% yield).  $E/Z$  = 5/1.  $^1H$  NMR (500 MHz, Chloroform-*d*)  $\delta$  7.71 (d,  $J$  = 2.3 Hz, 1H), 7.64 (d,  $J$  = 9.6 Hz, 1H), 7.58 (dd,  $J$  = 9.0, 2.3 Hz, 1H), 7.38 – 7.36 (m, 2H), 7.31 (d,  $J$  = 9.0 Hz, 1H), 7.28 – 7.25 (m, 3H), 6.72 (d,  $J$  = 9.6 Hz, 1H), 1.77 (s, 3H), 1.32 (s, 9H).  $^{13}C$  NMR (126 MHz, Chloroform-*d*)  $\delta$  168.00, 160.31, 138.75, 138.06, 137.22, 136.39, 134.03, 133.77, 130.89, 128.87, 128.49, 128.18, 123.73, 121.95, 116.99, 115.51, 82.20, 27.66, 16.50. HRMS(ESI)  $m/z$ : calculated for  $[C_{23}H_{22}BrNO_3+H]^+$  440.0856, found 440.0849. HPLC data (Chiralpak OD column, hexane: isopropanol = 95:5, 1.0 mL/min),  $t_r$  = 24.2 min (minor),  $t_r$  = 30.4 min (major), ee = 97%.

***tert*-butyl (*P, Z*)-3-(6-methoxy-2-oxoquinolin-1(2*H*)-yl)-2-methyl-3-phenylacrylate [(*P, Z*)-3u]**

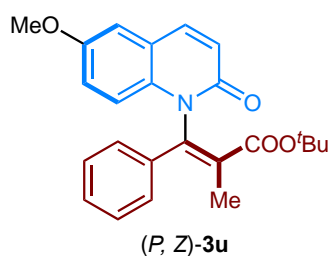

Following the general procedure of **D**, (*P, Z*)-3u was obtained as white solid (56 % yield).  $^1H$  NMR (500 MHz, Chloroform-*d*)  $\delta$  7.71 (d,  $J$  = 9.5 Hz, 1H), 7.48 (d,  $J$  = 6.7 Hz, 2H), 7.36 (q,  $J$  = 6.1 Hz, 4H), 7.15 (dd,  $J$  = 9.2, 2.7 Hz, 1H), 7.04 (d,  $J$  = 2.7 Hz,



1H), 6.79 (d,  $J = 9.5$  Hz, 1H), 3.89 (s, 3H), 2.32 (s, 3H), 1.11 (s, 9H).  $^{13}\text{C}$  NMR (126 MHz, Chloroform- $d$ )  $\delta$  161.05, 154.91, 139.30, 137.10, 135.98, 134.76, 132.71, 129.28, 128.86, 128.55, 128.27, 122.97, 121.02, 119.22, 117.25, 110.10, 81.50, 55.73, 27.47, 17.50. HRMS(ESI)  $m/z$ : calculated for  $[\text{C}_{24}\text{H}_{25}\text{NO}_4+\text{H}]^+$  392.1856, found 392.1856. HPLC data (Chiralpak IA column, hexane: isopropanol = 90:10, 1.0 mL/min),  $t_r = 14.6$  min (minor),  $t_r = 22.6$  min (major), ee = 93%.

***tert*-butyl (*P, E*)-3-(6-methoxy-2-oxoquinolin-1(2*H*)-yl)-2-methyl-3-phenylacrylate [(*P, E*)-**3u**]**

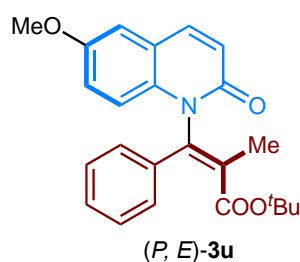

Following the general procedure of **F**, (*P, E*)-**3u** was obtained as white solid (67% yield).  $E/Z = 5/1$ .  $^1\text{H}$  NMR (500 MHz, Chloroform- $d$ )  $\delta$  7.67 (d,  $J = 9.6$  Hz, 1H), 7.40 – 7.36 (m, 3H), 7.26 (dt,  $J = 5.0, 2.5$  Hz, 3H), 7.13 (dd,  $J = 9.2, 2.9$  Hz, 1H), 7.02 (d,  $J = 2.9$  Hz, 1H), 6.70 (d,  $J = 9.5$  Hz, 1H), 3.85 (s, 3H), 1.77 (s, 3H), 1.32 (s, 9H).  $^{13}\text{C}$  NMR (126 MHz, Chloroform- $d$ )  $\delta$  168.23, 160.39, 155.15, 139.51, 136.80, 133.64, 133.52, 128.67, 128.55, 128.07, 123.02, 121.21, 119.58, 116.59, 110.50, 82.01, 55.74, 27.66, 16.49. HRMS(ESI)  $m/z$ : calculated for  $[\text{C}_{24}\text{H}_{25}\text{NO}_4+\text{H}]^+$  392.1856, found 392.1855. HPLC data (Chiralpak AD column, hexane: isopropanol = 95:5, 1.0 mL/min),  $t_r = 26.5$  min (major),  $t_r = 30.3$  min (minor), ee = 94%.

***tert*-butyl (*P, Z*)-3-(7-bromo-2-oxoquinolin-1(2*H*)-yl)-2-methyl-3-phenylacrylate [(*P, Z*)-**3v**]**

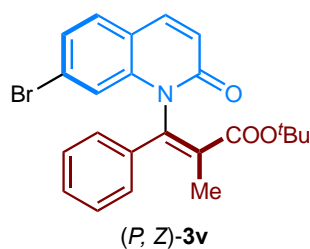

Following the general procedure of **D**, (*P, Z*)-**3v** was obtained as white solid (82 % yield).  $^1\text{H}$  NMR (500 MHz, Chloroform- $d$ )  $\delta$  7.65 (d,  $J = 9.5$  Hz, 1H), 7.51 (d,  $J = 1.7$

Hz, 1H), 7.45 – 7.43 (m, 2H), 7.38 (d,  $J = 8.2$  Hz, 1H), 7.36 – 7.27 (m, 4H), 6.69 (d,  $J = 9.5$  Hz, 1H), 2.28 (s, 3H), 1.08 (s, 9H).  $^{13}\text{C}$  NMR (126 MHz, Chloroform- $d$ )  $\delta$  166.39, 161.13, 141.06, 139.15, 136.23, 135.52, 133.41, 129.46, 129.23, 129.04, 128.42, 125.58, 124.90, 122.73, 119.13, 118.90, 81.59, 27.47, 17.51. HRMS(ESI)  $m/z$ : calculated for  $[\text{C}_{23}\text{H}_{22}\text{BrNO}_3+\text{H}]^+$  440.0856, found 440.0860. HPLC data (Chiralpak AD column, hexane: isopropanol = 85:15, 1.0 mL/min),  $t_r = 6.6$  min (minor),  $t_r = 17.7$  min (major), ee = 95%.

***tert*-butyl (*P, E*)-3-(7-bromo-2-oxoquinolin-1(2*H*)-yl)-2-methyl-3-phenylacrylate [(*P, E*)-3v]**

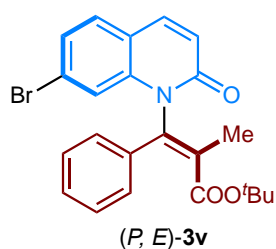

Following the general procedure of **F**, (*P, E*)-3v was obtained as white solid (84% yield).  $E/Z = 9/1$ .  $^1\text{H}$  NMR (500 MHz, Chloroform- $d$ )  $\delta$  7.68 (dd,  $J = 9.6, 0.6$  Hz, 1H), 7.57 (d,  $J = 1.8$  Hz, 1H), 7.42 (d,  $J = 8.3$  Hz, 1H), 7.40 – 7.38 (m, 2H), 7.34 (dd,  $J = 8.3, 1.8$  Hz, 1H), 7.30 – 7.26 (m, 3H), 6.70 (d,  $J = 9.5$  Hz, 1H), 1.79 (s, 3H), 1.32 (s, 9H).  $^{13}\text{C}$  NMR (126 MHz, Chloroform- $d$ )  $\delta$  167.92, 160.43, 140.03, 139.39, 137.09, 136.38, 134.24, 129.87, 128.87, 128.52, 128.23, 126.06, 125.46, 122.74, 119.26, 118.11, 82.17, 27.64, 16.51. HRMS(ESI)  $m/z$ : calculated for  $[\text{C}_{23}\text{H}_{22}\text{BrNO}_3+\text{H}]^+$  440.0856, found 440.0847. HPLC data (Chiralpak AD column, hexane: isopropanol = 95:5, 1.0 mL/min),  $t_r = 14.5$  min (major),  $t_r = 17.6$  min (minor), ee = 95%.

***tert*-butyl (*P, Z*)-3-(7-methoxy-2-oxoquinolin-1(2*H*)-yl)-2-methyl-3-phenylacrylate [(*P, Z*)-3w]**

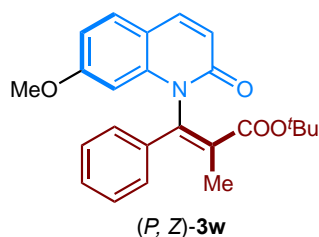

Following the general procedure of **D**, (*P, Z*)-3w was obtained as white solid (65%

yield).  $^1\text{H NMR}$  (500 MHz, Chloroform-*d*)  $\delta$  7.63 (d,  $J = 9.6$  Hz, 1H), 7.47 – 7.43 (m, 3H), 7.34 – 7.29 (m, 3H), 6.82 (d,  $J = 2.4$  Hz, 1H), 6.77 (dd,  $J = 8.6, 2.4$  Hz, 1H), 6.53 (d,  $J = 9.4$  Hz, 1H), 3.81 (s, 3H), 2.28 (s, 3H), 1.06 (s, 9H).  $^{13}\text{C NMR}$  (126 MHz, Chloroform-*d*)  $\delta$  166.82, 161.77, 141.88, 139.56, 137.19, 135.99, 132.63, 129.64, 129.29, 128.86, 128.52, 128.28, 119.22, 114.57, 110.53, 99.82, 81.48, 55.53, 27.43, 17.46. HRMS(ESI)  $m/z$ : calculated for  $[\text{C}_{24}\text{H}_{25}\text{NO}_4+\text{H}]^+$  392.1856, found 392.1856. HPLC data (Chiralpak AD column, hexane: isopropanol = 85:15, 1.0 mL/min),  $t_r = 7.5$  min (minor),  $t_r = 23.9$  min (major), ee = 95%.

***tert*-butyl (*P, E*)-3-(7-methoxy-2-oxoquinolin-1(2*H*)-yl)-2-methyl-3-phenylacrylate [(*P, E*)-3w]**

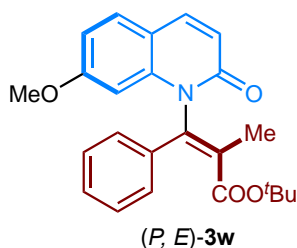

Following the general procedure of **F**, (*P, E*)-3w was obtained as white solid (71% yield).  $E/Z = 7/1$ .  $^1\text{H NMR}$  (500 MHz, Chloroform-*d*)  $\delta$  7.66 (d,  $J = 9.5$  Hz, 1H), 7.47 (d,  $J = 8.6$  Hz, 1H), 7.43 – 7.41 (m, 2H), 7.27 (dd,  $J = 5.1, 2.0$  Hz, 3H), 6.92 (d,  $J = 2.4$  Hz, 1H), 6.81 (dd,  $J = 8.6, 2.4$  Hz, 1H), 6.53 (d,  $J = 9.5$  Hz, 1H), 3.82 (s, 3H), 1.80 (s, 3H), 1.31 (s, 9H).  $^{13}\text{C NMR}$  (126 MHz, Chloroform-*d*)  $\delta$  168.30, 162.12, 161.23, 140.90, 139.81, 137.58, 136.69, 133.72, 129.99, 128.71, 128.53, 128.12, 119.14, 114.61, 110.92, 99.02, 81.96, 55.52, 27.66, 16.55. HRMS(ESI)  $m/z$ : calculated for  $[\text{C}_{24}\text{H}_{25}\text{NO}_4+\text{H}]^+$  392.1856, found 392.1854. HPLC data (Chiralpak AD column, hexane: isopropanol = 85:15, 1.0 mL/min),  $t_r = 7.0$  min (major),  $t_r = 8.5$  min (minor), ee = 93%.

***tert*-butyl (*P, Z*)-2-methyl-3-(2-oxo-7-(prop-1-en-2-yl)quinolin-1(2*H*)-yl)-3-phenylacrylate [(*P, Z*)-3x]**

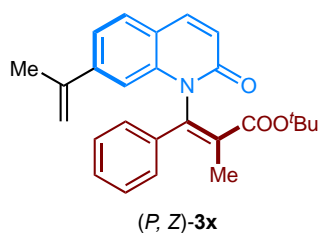

Following the general procedure of **D**, (*P, Z*)-**3x** was obtained as white solid (68% yield). <sup>1</sup>H NMR (500 MHz, Chloroform-*d*) δ 7.66 (d, *J* = 9.5 Hz, 1H), 7.47 (d, *J* = 7.7 Hz, 1H), 7.40 (t, *J* = 7.9 Hz, 1H), 7.34 (d, *J* = 6.6 Hz, 2H), 7.25 (q, *J* = 8.9, 7.3 Hz, 4H), 7.19 (s, 1H), 7.14 (t, *J* = 7.6 Hz, 1H), 6.62 (d, *J* = 9.5 Hz, 1H), 2.18 (s, 3H), 2.02 (s, 3H), 1.18 (s, 9H). <sup>13</sup>C NMR (126 MHz, Chloroform-*d*) δ 166.73, 161.62, 143.67, 142.65, 140.19, 139.34, 137.01, 136.10, 132.76, 129.30, 128.86, 128.29, 128.06, 122.06, 119.90, 119.59, 114.64, 113.00, 81.43, 27.39, 21.71, 17.41. HRMS(ESI) *m/z*: calculated for [C<sub>26</sub>H<sub>27</sub>NO<sub>3</sub>+H]<sup>+</sup> 402.2064, found 402.2063. HPLC data (Chiralpak AD column, hexane: isopropanol = 90:10, 1.0 mL/min), *tr* = 7.2 min (minor), *tr* = 21.9 min (major), *ee* = 97%.

**tert-butyl (*P, E*)-2-methyl-3-(2-oxo-7-(prop-1-en-2-yl)quinolin-1(2H)-yl)-3-phenylacrylate [(*P, E*)-**3x**]**

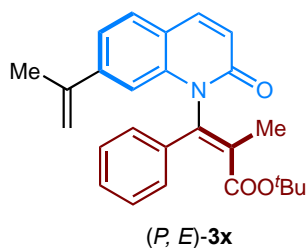

Following the general procedure of **F**, (*P, E*)-**3x** was obtained as white solid (41% yield). *E/Z* = 1.4/1. <sup>1</sup>H NMR (500 MHz, Chloroform-*d*) δ 7.71 (d, *J* = 9.5 Hz, 1H), 7.53 – 7.51 (m, 2H), 7.39 (ddd, *J* = 16.5, 7.1, 2.0 Hz, 4H), 7.27 (d, *J* = 2.6 Hz, 2H), 6.67 (d, *J* = 9.5 Hz, 1H), 5.46 (s, 1H), 5.20 (s, 1H), 2.15 (s, 3H), 1.78 (s, 3H), 1.30 (s, 9H). <sup>13</sup>C NMR (126 MHz, Chloroform-*d*) δ 168.29, 160.95, 143.79, 142.36, 139.54, 139.23, 137.36, 133.80, 128.69, 128.54, 128.41, 128.13, 125.37, 122.08, 120.21, 119.69, 114.70, 112.23, 81.92, 27.64, 21.65, 16.58. HRMS(ESI) *m/z*: calculated for [C<sub>26</sub>H<sub>27</sub>NO<sub>3</sub>+H]<sup>+</sup> 402.2064, found 402.2061. HPLC data (Chiralpak AD column, hexane: isopropanol = 95:5, 1.0 mL/min), *tr* = 12.5 min (major), *tr* = 15.8 min (minor), *ee* = 93%.

***tert*-butyl (*P, Z*)-3-(7-(4-(((1*S*,2*R*,5*S*)-2-isopropyl-5-methylcyclohexyl)oxy)methyl)phenyl)-2-oxoquinolin-1(2*H*)-yl)-2-methyl-3-phenylacrylate [(*P, Z*)-**3y**]**

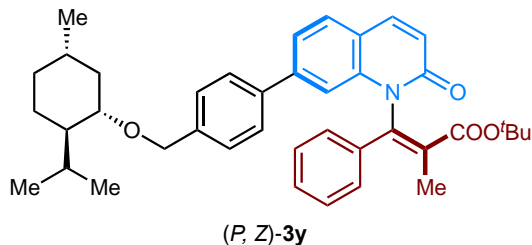

Following the general procedure of **D**, (*P, Z*)-**3y** was obtained as white solid with beyond 20/1 dr (72% yield).  $^1\text{H NMR}$  (500 MHz, Chloroform-*d*)  $\delta$  7.79 (d,  $J = 9.5$  Hz, 1H), 7.64 (d,  $J = 8.1$  Hz, 1H), 7.60 – 7.57 (m, 3H), 7.54 – 7.50 (m, 4H), 7.45 (d,  $J = 7.9$  Hz, 1H), 7.37 (dt,  $J = 11.8, 6.9$  Hz, 3H), 6.74 (d,  $J = 9.5$  Hz, 1H), 4.77 (d,  $J = 11.5$  Hz, 1H), 4.50 (d,  $J = 11.5$  Hz, 1H), 3.27 (td,  $J = 10.5, 4.1$  Hz, 1H), 2.41 – 2.37 (m, 1H), 2.35 (s, 3H), 2.28 (d,  $J = 12.3$  Hz, 1H), 1.88 (d,  $J = 14.9$  Hz, 1H), 1.74 – 1.68 (m, 2H), 1.08 (s, 9H), 0.99 (dd,  $J = 16.0, 6.7$  Hz, 10H), 0.82 (d,  $J = 7.0$  Hz, 3H).  $^{13}\text{C NMR}$  (126 MHz, Chloroform-*d*)  $\delta$  166.82, 161.59, 143.52, 140.59, 139.58, 139.42, 139.32, 137.01, 136.06, 132.84, 129.32, 128.88, 128.70, 128.42, 128.31, 127.39, 122.18, 121.57, 119.43, 114.45, 79.12, 70.08, 48.40, 40.40, 34.63, 31.64, 27.41, 25.65, 23.36, 22.42, 21.09, 17.45, 16.21. HRMS(ESI)  $m/z$ : calculated for  $[\text{C}_{40}\text{H}_{47}\text{NO}_4 + \text{H}]^+$  606.3578, found 606.3578.

***tert*-butyl (*P, E*)-3-(7-(4-(((1*S*,2*R*,5*S*)-2-isopropyl-5-methylcyclohexyl)oxy)methyl)phenyl)-2-oxoquinolin-1(2*H*)-yl)-2-methyl-3-phenylacrylate [(*P, E*)-**3y**]**

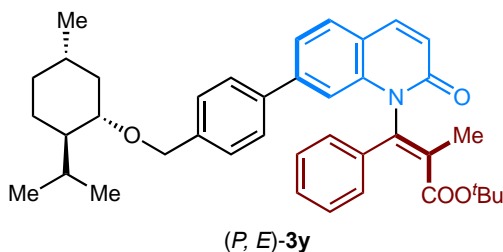

Following the general procedure of **F**, (*P, E*)-**3y** was obtained as white solid (52% yield) with beyond 20/1 dr.  $E/Z = 2/1$ .  $^1\text{H NMR}$  (500 MHz, Chloroform-*d*)  $\delta$  7.75 (d,  $J = 9.6$  Hz, 1H), 7.66 (d,  $J = 1.6$  Hz, 1H), 7.63 (d,  $J = 8.0$  Hz, 1H), 7.56 (d,  $J = 8.2$  Hz, 2H),

7.48 (dd,  $J = 8.1, 1.6$  Hz, 1H), 7.44 (dt,  $J = 7.3, 2.6$  Hz, 4H), 7.28 (q,  $J = 2.6, 2.0$  Hz, 3H), 6.69 (d,  $J = 9.5$  Hz, 1H), 4.71 (d,  $J = 11.6$  Hz, 1H), 4.45 (d,  $J = 11.6$  Hz, 1H), 3.21 (td,  $J = 10.5, 4.1$  Hz, 1H), 2.33 (qd,  $J = 7.0, 2.6$  Hz, 1H), 2.22 (dq,  $J = 11.7, 3.3, 2.7$  Hz, 1H), 1.81 (s, 3H), 1.70 – 1.62 (m, 3H), 1.31 (s, 9H), 1.03 – 0.83 (m, 10H), 0.75 (d,  $J = 6.9$  Hz, 3H).  $^{13}\text{C}$  NMR (126 MHz, Chloroform- $d$ )  $\delta$  168.19, 160.91, 143.62, 139.65, 139.59, 139.50, 139.08, 137.47, 136.86, 133.90, 129.08, 128.71, 128.59, 128.46, 128.17, 127.22, 122.20, 121.67, 119.57, 113.43, 81.91, 79.14, 70.03, 48.39, 40.39, 34.62, 31.63, 27.66, 25.66, 23.35, 22.41, 21.06, 16.58, 16.20. HRMS(ESI)  $m/z$ : calculated for  $[\text{C}_{40}\text{H}_{47}\text{NO}_4 + \text{H}]^+$  606.3578, found 606.3573.

***tert*-butyl (*P, Z*)-2-methyl-3-(2-oxo-6-(4-(((*R*)-2,5,7,8-tetramethyl-2-((4*R,8R*)-4,8,12-trimethyltridecyl)chroman-6-yl)oxy)methyl)phenyl)quinolin-1(2*H*)-yl)-3-phenylacrylate [(*P, Z*)-3z]**

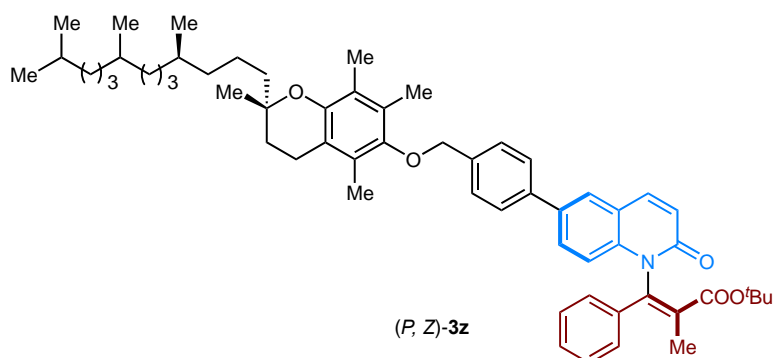

Following the general procedure of **D**, (*P, Z*)-**3z** was obtained as white solid with beyond 20/1 dr (64% yield).  $^1\text{H}$  NMR (500 MHz, Chloroform- $d$ )  $\delta$  7.84 (d,  $J = 10.6$  Hz, 2H), 7.79 (d,  $J = 9.5$  Hz, 1H), 7.69 (d,  $J = 8.0$  Hz, 2H), 7.65 (d,  $J = 8.0$  Hz, 2H), 7.55 (d,  $J = 7.4$  Hz, 2H), 7.51 (d,  $J = 8.7$  Hz, 1H), 7.38 (dd,  $J = 11.3, 7.2$  Hz, 3H), 6.80 (d,  $J = 9.5$  Hz, 1H), 4.80 (s, 2H), 2.66 (t,  $J = 7.0$  Hz, 2H), 2.36 (s, 3H), 2.30 (s, 3H), 2.25 (s, 3H), 2.17 (s, 3H), 1.93 – 1.82 (m, 2H), 1.75 (s, 2H), 1.61 (tt,  $J = 13.7, 6.2$  Hz, 3H), 1.45 (d,  $J = 5.7$  Hz, 2H), 1.31 (s, 10H), 1.13 (s, 17H), 0.93 (d,  $J = 6.4$  Hz, 11H).  $^{13}\text{C}$  NMR (126 MHz, Chloroform- $d$ )  $\delta$  166.82, 161.59, 143.52, 140.59, 139.63, 139.58, 139.42, 139.32, 137.01, 136.06, 132.84, 129.32, 128.88, 128.70, 128.58, 128.46, 128.42, 128.31, 128.17, 127.39, 127.21, 122.18, 121.56, 119.43, 114.45, 81.49, 79.12, 70.07, 60.40, 53.45, 48.40, 40.40, 34.63, 31.96, 31.64, 31.48, 30.25, 29.73, 29.69, 29.39, 27.66,

27.41, 25.65, 23.36, 22.72, 22.42, 21.09, 17.45, 16.58, 16.21, 14.24, 14.15. HRMS(ESI)  $m/z$ : calculated for  $[C_{59}H_{77}NO_5+H]^+$  880.5875, found 880.5871.

***tert*-butyl (*P, E*)-2-methyl-3-(2-oxo-6-(4-(((*R*)-2,5,7,8-tetramethyl-2-((4*R,8R*)-4,8,12-trimethyltridecyl)chroman-6-yl)oxy)methyl)phenyl)quinolin-1(2*H*)-yl)-3-phenylacrylate [(*P, E*)-3z]**

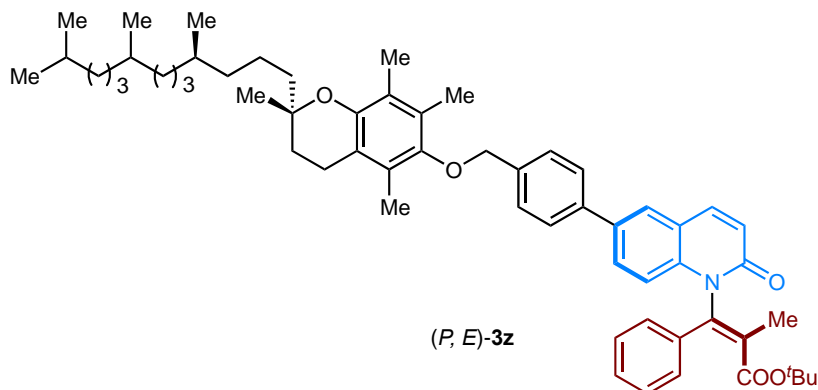

Following the general procedure of **F**, (*P, E*)-**3z** was obtained as white solid with beyond 20/1 dr (42% yield).  $E/Z = 2/1$ .  $^1H$  NMR (500 MHz, Chloroform-*d*)  $\delta$  7.77 (d,  $J = 9.4$  Hz, 1H), 7.69 (s, 1H), 7.66 – 7.58 (m, 5H), 7.50 (d,  $J = 8.1$  Hz, 1H), 7.45 (dd,  $J = 6.7, 2.9$  Hz, 2H), 7.30 – 7.28 (m, 3H), 6.71 (d,  $J = 9.5$  Hz, 1H), 4.75 (s, 2H), 2.60 (t,  $J = 6.9$  Hz, 2H), 2.24 (s, 3H), 2.19 (s, 3H), 2.11 (s, 3H), 1.87 – 1.75 (m, 5H), 1.66 (s, 1H), 1.58 – 1.33 (m, 9H), 1.31 – 1.28 (m, 13H), 1.21 – 0.99 (m, 9H), 0.87 – 0.84 (m, 13H).  $^{13}C$  NMR (126 MHz, Chloroform-*d*)  $\delta$  168.18, 160.93, 148.14, 148.07, 143.54, 139.67, 139.60, 139.47, 138.36, 137.43, 136.85, 133.95, 129.13, 128.74, 128.62, 128.24, 128.20, 127.90, 127.40, 125.92, 123.07, 122.30, 121.74, 119.66, 117.71, 113.54, 81.95, 74.91, 74.19, 40.10, 39.42, 37.54, 37.51, 37.47, 37.34, 32.85, 32.76, 31.37, 28.03, 27.68, 24.85, 24.49, 23.94, 22.76, 22.67, 21.08, 20.74, 19.80, 19.72, 16.60, 12.92, 12.05, 11.87. HRMS(ESI)  $m/z$ : calculated for  $[C_{59}H_{77}NO_5+H]^+$  880.5875, found 880.5879.

## Racemization experiments

Compound (*P, Z*)-**3a**, (*P, E*)-**3a** (0.1 mmol) was dissolved in toluene (1.0 mL) in a sealed tube, respectively. The tube was placed at room temperature. At given interval of time, small samples (5  $\mu\text{L}$ ) was removed via syringe and subjected into the HPLC to measure the enantiomeric excess.  $R = 8.31451 \text{ J} \cdot \text{K}^{-1} \cdot \text{mol}^{-1}$ ,  $h = 6.62608 \cdot 10^{-34} \text{ J} \cdot \text{s}$  and  $k_B = 1.38066 \cdot 10^{-23} \text{ J} \cdot \text{K}^{-1} \cdot (-\ln ee = \ln\{(1+M/P)/(1-M/P)\})$

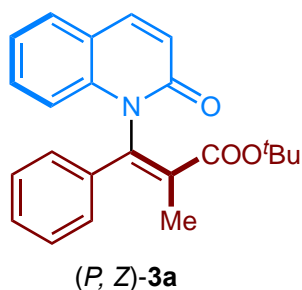

| Time (h) | ee    | -ln ee     |
|----------|-------|------------|
| 0        | 90.34 | -4.5035803 |
| 2        | 88.97 | -4.4882992 |
| 9        | 86.90 | -4.4647081 |
| 33       | 81.98 | -4.4065192 |
| 68       | 74.93 | -4.3164881 |
| 92       | 69.50 | -4.2413268 |
| 105      | 66.69 | -4.200105  |
| 140      | 58.93 | -4.0763374 |
| 164      | 55.18 | -4.0105332 |

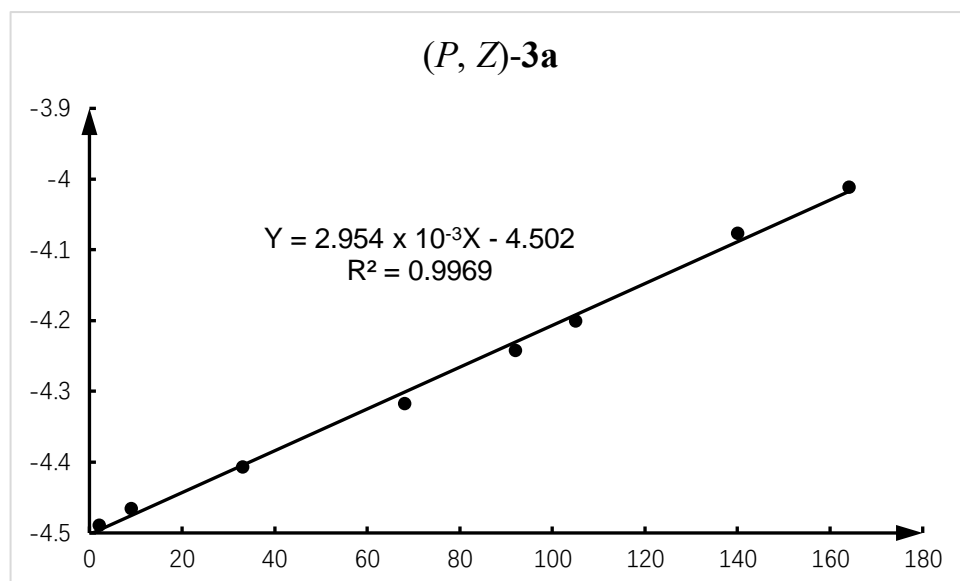

Supplementary Fig. 3. Racemization experiment of (*P, Z*)-**3a**

$$K_{(P, Z)\text{-}3a \text{ racemization}} = 0.002954 \text{ h}^{-1} = 8.206 \cdot 10^{-7} \text{ s}^{-1}$$

$$\text{Half-life time } t_{(P, Z)\text{-}3a \text{ } 1/2}^{298\text{K}} = 234.65 \text{ h}$$

$$\Delta G_{(P, Z)\text{-}3a}^{298\text{K}} = 107.70 \text{ KJ/mol} = 25.73 \text{ kcal/mol}$$



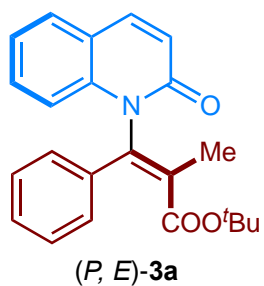

| Time (h) | ee    | -ln ee     |
|----------|-------|------------|
| 0        | 91.2  | -4.5130549 |
| 6        | 90.92 | -4.50998   |
| 12       | 90.58 | -4.5062334 |
| 72       | 88.74 | -4.4857107 |
| 144      | 86.8  | -4.4636066 |
| 312      | 81.96 | -4.4062313 |
| 408      | 80.18 | -4.3842741 |

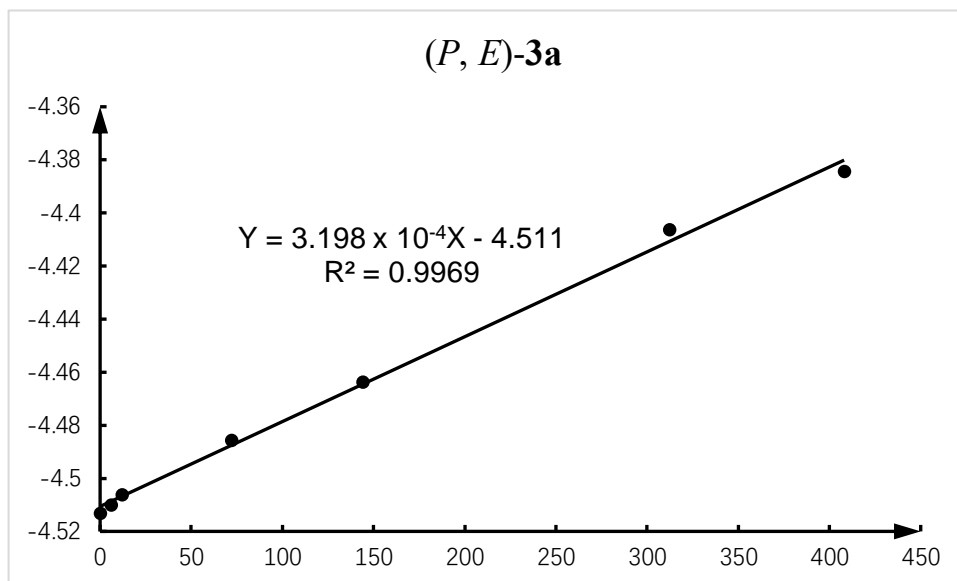

**Supplementary Fig. 4. Racemization experiment of (*P, E*)-3a**

$$K_{(P,E)\text{-}3a \text{ racemization}} = 0.0003198 \text{ h}^{-1} = 8.883 \times 10^{-8} \text{ s}^{-1}$$

$$\text{Half-life time } t_{(P,E)\text{-}3a \text{ } 1/2}^{298\text{K}} = 2167.44 \text{ h}$$

$$\Delta G_{(P,E)\text{-}3a}^{298\text{K}} = 113.21 \text{ KJ/mol} = 27.05 \text{ kcal/mol}$$

## Large-scale reactions for the synthesis of **3a**

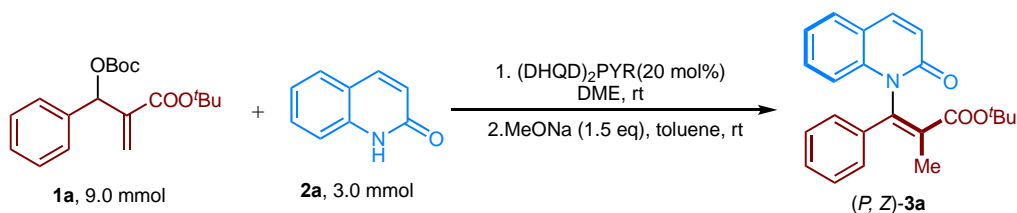

To a flame-dried round-bottom flask equipped with a magnetic stirring bar was added **1a** (9.0 mmol), **2a** (3.0 mmol) and (DHQD)<sub>2</sub>PYR (0.6 mmol, 528.6 mg). The flask was then charged with DME (20.0 mL) and stirred at room temperature for several days. After the completion of the reaction monitored by TLC, DME was removed by distillation under reduced pressure. Then MeONa (4.5 mmol, 1.5 eq) was added into the flask. The flask was charged with toluene (10 mL) and stirred at room temperature for about 1 h until the full consumption of the intermediate by TLC monitoring. Then the residue was purified directly by column chromatography over silica gel (PE: EA = 20:1 to 5:1) to afford the desired product **(P, Z)-3a** as white solid (78% yield, 94% ee).

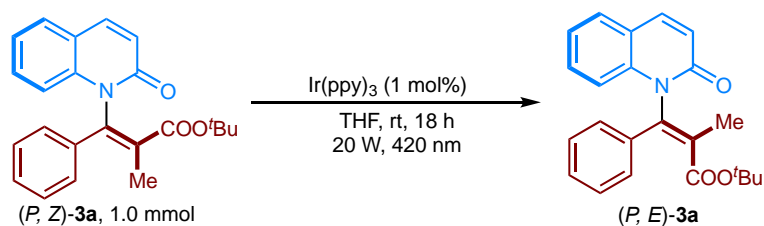

The compound **(P, Z)-3a** (1.0 mmol, 1.0 eq) and Ir(ppy)<sub>3</sub> (1 mol%) were weighed out into a 20 mL scintillation vial. The vial was charged with THF (10 mL) and the reaction was stirred at room temperature under visible light irradiation (420 nm) for 18 h. Then the mixture was concentrated under reduced pressure and purified directly by column chromatography over silica gel (PE: EA = 50:1 to 10:1) to afford the desired product **(P, E)-3a**. (72% yield, 94% ee)

## Stereodivergent synthesis of axially chiral *N*-vinylquinolinones **3a/3s**

*tert*-butyl **(P, Z)**-2-methyl-3-(2-oxoquinolin-1(2*H*)-yl)-3-phenylacrylate [**(P, Z)-3a**]

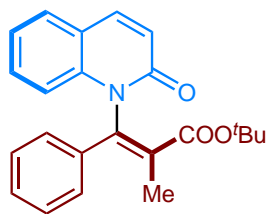

(*P, Z*)-**3a**

Following the general procedure of **D**, (*P, Z*)-**3a** was obtained as white solid (87% yield). HPLC data (Chiralpak OD column, hexane: isopropanol = 95:5, 1.0 mL/min),  $t_r = 12.4$  min (minor),  $t_r = 14.1$  min (major), ee = 94%.

**tert-butyl (*M, Z*)-2-methyl-3-(2-oxoquinolin-1(2*H*)-yl)-3-phenylacrylate [(*M, Z*)-**3a**]**

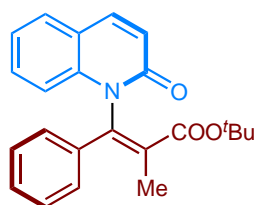

(*M, Z*)-**3a**

Following the general procedure of **D**, using (DHQ)<sub>2</sub>PYR instead of (DHQD)<sub>2</sub>PYR, (*M, Z*)-**3a** was obtained as white solid (78% yield). HPLC data (Chiralpak OD column, hexane: isopropanol = 95:5, 1.0 mL/min),  $t_r = 11.9$  min (major),  $t_r = 14.2$  min (minor), ee = 86%.

**tert-butyl (*P, E*)-2-methyl-3-(2-oxoquinolin-1(2*H*)-yl)-3-phenylacrylate [(*P, E*)-**3a**]**

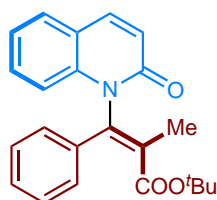

(*P, E*)-**3a**

Following the general procedure of **G**, (*P, E*)-**3a** was obtained as white solid (73% yield). HPLC data (Chiralpak OD column, hexane: isopropanol = 95:5, 1.0 mL/min),  $t_r = 15.5$  min (minor),  $t_r = 23.3$  min (minor), ee = 94%.

**tert-butyl (*M, E*)-2-methyl-3-(2-oxoquinolin-1(2*H*)-yl)-3-phenylacrylate [(*M, E*)-**3a**]**

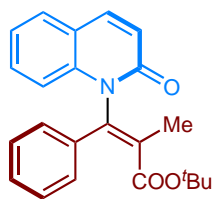

(*M, E*)-**3a**

Following the general procedure of **G**, using (DHQ)<sub>2</sub>PYR instead of (DHQD)<sub>2</sub>PYR, (*M, E*)-**3a** was obtained as white solid (65% yield). HPLC data (Chiralpak OD column, hexane: isopropanol = 95:5, 1.0 mL/min), *tr* = 15.4 min (major), *tr* = 25.9 min (minor), *ee* = 84%.

**tert-butyl (*P, Z*)-3-(5-bromo-2-oxoquinolin-1(2*H*)-yl)-2-methyl-3-phenylacrylate [(*P, Z*)-**3s**]**

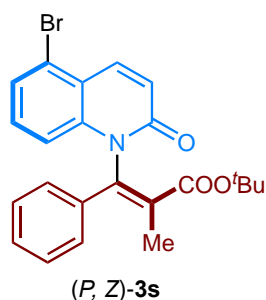

Following the general procedure of **D**, (*P, Z*)-**3s** was obtained as white solid (84% yield). HPLC data (Chiralpak AD column, hexane: isopropanol = 85:15, 1.0 mL/min), *tr* = 7.2 min (minor), *tr* = 14.4 min (major), *ee* = 96%.

**tert-butyl (*M, Z*)-3-(5-bromo-2-oxoquinolin-1(2*H*)-yl)-2-methyl-3-phenylacrylate [(*M, Z*)-**3s**]**

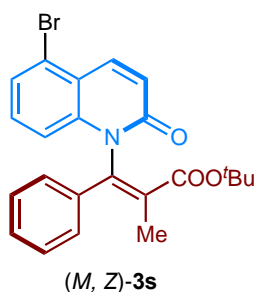

Following the general procedure of **D**, using (DHQ)<sub>2</sub>PYR instead of (DHQD)<sub>2</sub>PYR, (*M, Z*)-**3s** was obtained as white solid (78% yield). HPLC data (Chiralpak AD column, hexane: isopropanol = 85:15, 1.0 mL/min), *tr* = 7.5 min (major), *tr* = 15.3 min (minor), *ee* = 88%.

**tert-butyl (*P, E*)-3-(5-bromo-2-oxoquinolin-1(2*H*)-yl)-2-methyl-3-phenylacrylate [(*P, E*)-**3s**]**

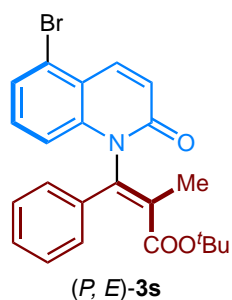

Following the general procedure of **G**, (*P, E*)-**3s** was obtained as white solid (65% yield). HPLC data (Chiralpak AD column, hexane: isopropanol = 95:5, 1.0 mL/min),  $t_r = 17.6$  min (major),  $t_r = 19.6$  min (minor), ee = 97%.

**tert-butyl (*M, E*)-3-(5-bromo-2-oxoquinolin-1(2*H*)-yl)-2-methyl-3-phenylacrylate**  
 [(*M, E*)-**3s**]

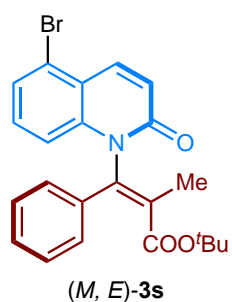

Following the general procedure of **G**, using (DHQ)<sub>2</sub>PYR instead of (DHQD)<sub>2</sub>PYR, (*M, E*)-**3s** was obtained as white solid (61% yield). HPLC data (Chiralpak AD column, hexane: isopropanol = 95:5, 1.0 mL/min),  $t_r = 18.4$  min (minor),  $t_r = 20.0$  min (major), ee = 88%.

### Stereodivergent transformations of axially chiral *N*-vinylquinolinones

#### 3

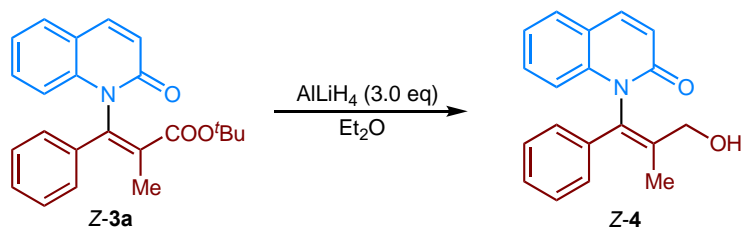

The reaction was proceeded under argon atmosphere. The compound (*P, Z*)-**3a**/(*M, Z*)-**3a** (0.2 mmol) and AlLiH<sub>4</sub> (0.6 mmol) were weighed out into a 10 mL tube. Then the tube was cooled down to -15 °C. Then Et<sub>2</sub>O (1.0 mL) was added into the tube. The

reaction was stirred at -15 °C overnight. Then a drop of water was added and the mixture was purified directly by column chromatography over silica gel (PE: EA = 5:1 to 1:1) to afford the desired product (*P, Z*)-4/(*M, Z*)-4.

**(*P, Z*)-1-(3-hydroxy-2-methyl-1-phenylprop-1-en-1-yl)quinolin-2(1*H*)-one [(*P, Z*)-4]**

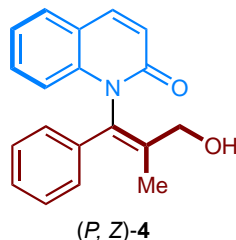

Colorless oil. (56% yield)  $^1\text{H NMR}$  (500 MHz, Chloroform-*d*)  $\delta$  7.78 (d,  $J = 9.3$  Hz, 1H), 7.55 (d,  $J = 8.0$  Hz, 1H), 7.39 (dd,  $J = 16.2, 7.9$  Hz, 3H), 7.29 (dd,  $J = 8.1, 5.5$  Hz, 3H), 7.24 (t,  $J = 7.7$  Hz, 1H), 7.18 (t,  $J = 7.5$  Hz, 1H), 6.82 (d,  $J = 9.5$  Hz, 1H), 4.01 (d,  $J = 11.5$  Hz, 1H), 3.79 (d,  $J = 11.6$  Hz, 1H), 3.07 (s, 1H), 2.25 (s, 3H).  $^{13}\text{C NMR}$  (126 MHz, Chloroform-*d*)  $\delta$  163.27, 140.50, 139.49, 138.72, 136.05, 130.74, 130.60, 129.13, 128.60, 128.31, 128.20, 122.91, 121.92, 120.86, 116.46, 63.42, 17.81. HRMS(ESI)  $m/z$ : calculated for  $[\text{C}_{19}\text{H}_{17}\text{NO}_2+\text{H}]^+$  292.1332, found 292.1334. HPLC data (Chiralpak IA column, hexane: isopropanol = 90:10, 1.0 mL/min),  $t_r = 15.3$  min (minor),  $t_r = 17.8$  min (major), ee = 95%.

**(*M, Z*)-1-(3-hydroxy-2-methyl-1-phenylprop-1-en-1-yl)quinolin-2(1*H*)-one [(*M, Z*)-4]**

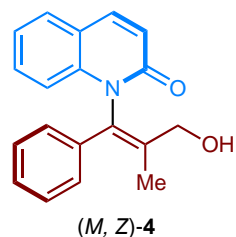

Colorless oil. (56% yield). HPLC data (Chiralpak IA column, hexane: isopropanol = 90:10, 1.0 mL/min),  $t_r = 15.5$  min (major),  $t_r = 18.4$  min (major), ee = 88%.

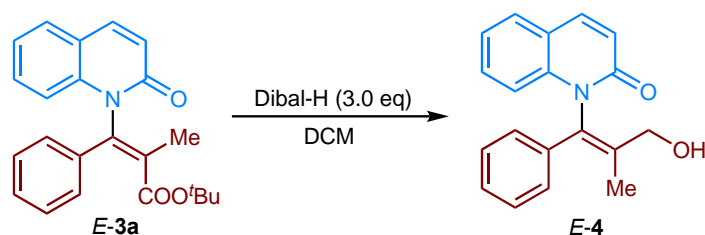

The reaction was proceeded under argon atmosphere. The compound (*P, E*)-**3a**/*(M, E)*-**3a** (0.2 mmol) was weighed out into a 10 mL tube. The tube was cooled down to -78 °C before DCM (1.0 mL) was added. Then Dibal-H (2.0 M in toluene, 0.3 mL) was added dropwise and the reaction was stirred at -78 °C for 5 h. Then a drop of water was added to quench the reaction. The reaction mixture was purified directly by column chromatography over silica gel (PE: EA = 5:1 to 1:1) to afford product (*P, E*)-**4**/*(M, E)*-**4**.

**(*P, E*)-1-(3-hydroxy-2-methyl-1-phenylprop-1-en-1-yl)quinolin-2(1*H*)-one [(*P, E*)-**4**]**

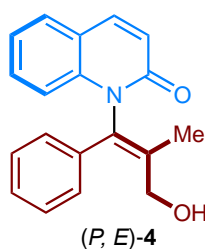

Colorless oil. (65% yield) <sup>1</sup>H NMR (500 MHz, Chloroform-d) δ 7.77 (d, *J* = 9.5 Hz, 1H), 7.57 (dd, *J* = 7.8, 1.5 Hz, 1H), 7.45 (ddd, *J* = 8.6, 7.0, 1.5 Hz, 1H), 7.41 – 7.39 (m, 3H), 7.26 (qd, *J* = 7.7, 6.6, 3.7 Hz, 3H), 7.21 – 7.19 (m, 1H), 6.77 (d, *J* = 9.5 Hz, 1H), 4.53 (d, *J* = 12.1 Hz, 1H), 4.36 (d, *J* = 12.1 Hz, 1H), 3.40 (s, 1H), 1.69 (s, 3H). <sup>13</sup>C NMR (126 MHz, Chloroform-d) δ 161.66, 140.27, 139.01, 138.98, 135.77, 131.82, 130.92, 129.20, 128.59, 128.32, 128.26, 122.74, 122.06, 120.69, 115.77, 63.20, 15.96. HRMS(ESI) *m/z*: calculated for [C<sub>19</sub>H<sub>17</sub>NO<sub>2</sub>+H]<sup>+</sup> 292.1332, found 292.1336. HPLC data (Chiralpak IA column, hexane: isopropanol = 90:10, 1.0 mL/min), *tr* = 11.9 min (minor), *tr* = 13.7 min (major), ee = 94%.

**(*M, E*)-1-(3-hydroxy-2-methyl-1-phenylprop-1-en-1-yl)quinolin-2(1*H*)-one [(*M, E*)-**4**]**

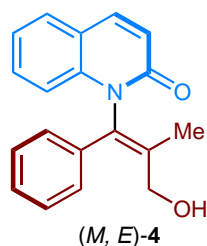

Colorless oil. (59% yield) HPLC data (Chiralpak IA column, hexane: isopropanol = 90:10, 1.0 mL/min),  $t_r$  = 11.8 min (major),  $t_r$  = 13.8 min (minor), ee = 85%.

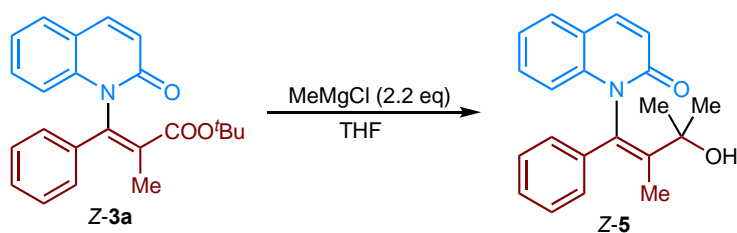

The reaction was proceeded under argon atmosphere. The Compound (*P, Z*)-**3a**/*(M, Z)*-**3a** (0.2 mmol) was weighed out into a 10ml tube. The tube was cooled down to -78 °C before THF (1.0 mL) was added. Then MeMgCl (3.0 M in THF, 0.15 mL) was added dropwise and the reaction was warmed to room temperature slowly and stirred for 1h. Then drops of water was added and the solvent was removed by distillation under reduced pressure. The crude product was purified by column chromatography over silica gel (PE: EA= 5:1 to 2:1) to afford the desired product (*P, Z*)-**5**/*(M, Z)*-**5**.

**(P, Z)-1-(3-hydroxy-2,3-dimethyl-1-phenylbut-1-en-1-yl)quinolin-2(1H)-one [(P, Z)-5]**

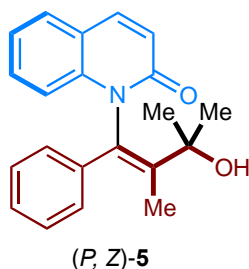

Colorless oil. (71% yield)  $^1\text{H NMR}$  (500 MHz, Chloroform-d)  $\delta$  7.71 (d,  $J$  = 9.5 Hz, 1H), 7.52 (d,  $J$  = 8.2 Hz, 2H), 7.50 – 7.48 (m, 1H), 7.46 – 7.44 (m, 2H), 7.27 (t,  $J$  = 7.5 Hz, 2H), 7.20 (dt,  $J$  = 15.2, 7.3 Hz, 2H), 6.75 (d,  $J$  = 9.5 Hz, 1H), 2.41 (s, 1H), 2.06 (s, 3H), 1.41 (s, 3H), 1.23 (s, 3H).  $^{13}\text{C NMR}$  (126 MHz, Chloroform-d)  $\delta$  163.06, 143.95, 140.08, 140.01, 138.91, 130.32, 129.70, 128.58, 128.31, 128.12, 127.85, 122.44,



122.19, 120.81, 116.96, 73.72, 29.31, 28.37, 19.23. HRMS(ESI)  $m/z$ : calculated for  $[C_{21}H_{21}NO_2+H]^+$  320.1645, found 320.1643. HPLC data (Chiralpak IA column, hexane: isopropanol = 90:10, 1.0 mL/min),  $t_r$  = 10.2 min (minor),  $t_r$  = 11.9 min (major), ee = 94%.

**(*M*, *Z*)-1-(3-hydroxy-2,3-dimethyl-1-phenylbut-1-en-1-yl)quinolin-2(1*H*)-one [(*M*, *Z*)-5]**

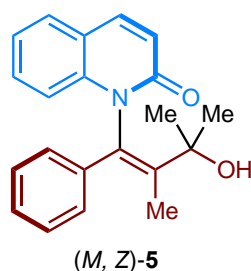

Colorless oil. (66% yield) HPLC data (Chiralpak IA column, hexane: isopropanol = 90:10, 1.0 mL/min),  $t_r$  = 9.8 min (major),  $t_r$  = 11.5 min (minor), ee = 86%.

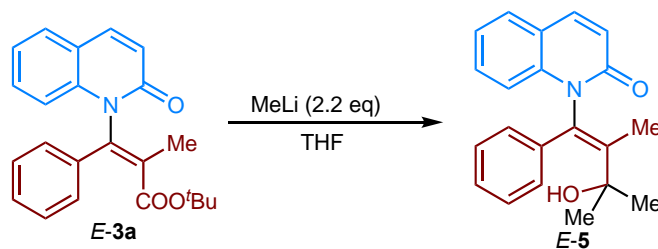

The reaction was proceeded under argon atmosphere. The compound (*P*, *E*)-3a/(*M*, *E*)-3a (0.2 mmol) was weighed out into a 10 mL tube. The tube was cooled down to -78 °C before THF (1.0 mL) was added. Then MeLi (3.0 M in THF, 0.15 mL) was added dropwise and the reaction was warmed to room temperature slowly and further stirred for 0.5 h. Then drops of water was added and the solvent was removed by distillation under reduced pressure. The crude product was purified by column chromatography over silica gel (PE: EA= 5:1 to 2:1) to afford the desired product (*P*, *E*)-5/(*M*, *E*)-5.

**(*P*, *E*)-1-(3-hydroxy-2,3-dimethyl-1-phenylbut-1-en-1-yl)quinolin-2(1*H*)-one [(*P*, *E*)-5]**

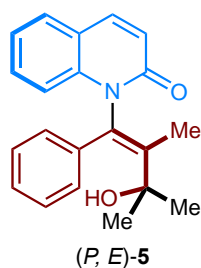

Colorless oil. (49% yield)  $^1\text{H NMR}$  (500 MHz, Chloroform- $d$ )  $\delta$  7.68 – 7.65 (m, 2H), 7.61 – 7.59 (m, 2H), 7.57 – 7.53 (m, 2H), 7.26 – 7.20 (m, 4H), 6.67 (d,  $J$  = 9.5 Hz, 1H), 1.96 (s, 1H), 1.60 (s, 3H), 1.51 (s, 3H), 1.47 (s, 3H).  $^{13}\text{C NMR}$  (126 MHz, Chloroform- $d$ )  $\delta$  161.02, 146.13, 139.56, 138.72, 138.44, 130.68, 129.73, 128.79, 128.30, 128.22, 128.03, 122.62, 122.41, 120.87, 115.37, 74.05, 30.66, 29.79, 16.80. HRMS(ESI)  $m/z$ : calculated for  $[\text{C}_{21}\text{H}_{21}\text{NO}_2+\text{Na}]^+$  342.1465, found 342.1464. HPLC data (Chiralpak ID column, hexane: isopropanol = 95:5, 1.0 mL/min),  $t_r$  = 35.6 min (minor),  $t_r$  = 46.4 min (major), ee = 92%.

**(M, E)-1-(3-hydroxy-2,3-dimethyl-1-phenylbut-1-en-1-yl)quinolin-2(1H)-one [(M, E)-5]**

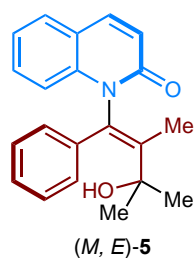

Colorless oil. (42% yield) HPLC data (Chiralpak ID column, hexane: isopropanol = 95:5, 1.0 mL/min),  $t_r$  = 35.6 min (major),  $t_r$  = 46.8 min (minor), ee = 85%.

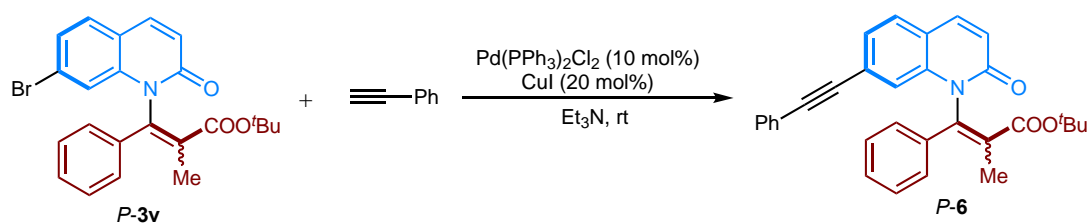

The reaction was proceeded under argon atmosphere. The compound (*P, Z*)-**3v**/*(P, E)*-**3v** (0.1 mmol), phenylacetylene (0.2 mmol),  $\text{Pd(PPh}_3)_2\text{Cl}_2$  (10 mol%) and  $\text{CuI}$  (20

mol%) were weighed out into a 2 dram scintillation vial equipped with a magnetic stirring bar. The vial was then charged with Et<sub>3</sub>N (0.75 mL) and stirred at room temperature for overnight. The solvent in the vial was removed by distillation under reduced pressure at room temperature. The crude product was purified by column chromatography over silica gel (PE: EA= 10:1 to 4:1) to afford the desired product (*P, Z*)-**6**/*(P, E)*-**6**.

**(*P, Z*)-tert-butyl (Z)-2-methyl-3-(2-oxo-7-(phenylethynyl)quinolin-1(2H)-yl)-3-phenylacrylate [(*P, Z*)-6]**

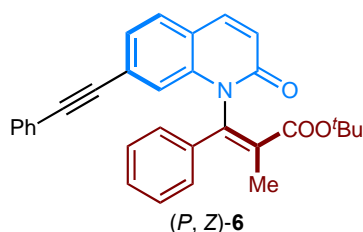

Brown oil. (76% yield). <sup>1</sup>H NMR (500 MHz, Chloroform-*d*) δ 7.68 (d, *J* = 9.5 Hz, 1H), 7.56 (dd, *J* = 6.7, 3.0 Hz, 2H), 7.51 – 7.46 (m, 4H), 7.37 – 7.31 (m, 7H), 6.69 (d, *J* = 9.5 Hz, 1H), 2.31 (s, 3H), 1.08 (s, 9H). <sup>13</sup>C NMR (126 MHz, Chloroform-*d*) δ 166.53, 161.34, 140.23, 139.23, 136.73, 135.82, 133.07, 131.80, 129.32, 128.97, 128.79, 128.46, 128.38, 128.32, 125.65, 125.58, 122.88, 122.75, 120.12, 118.59, 91.71, 89.07, 81.54, 27.50, 17.62. HRMS(ESI) *m/z*: calculated for [C<sub>31</sub>H<sub>27</sub>NO<sub>3</sub>+H]<sup>+</sup> 462.2064, found 462.2067. HPLC data (Chiralpak IA column, hexane: isopropanol = 80:20, 1.0 mL/min), *t<sub>r</sub>* = 6.2 min (minor), *t<sub>r</sub>* = 17.0 min (major), ee = 87%.

**(*P, E*)-tert-butyl (E)-2-methyl-3-(2-oxo-7-(phenylethynyl)quinolin-1(2H)-yl)-3-phenylacrylate [(*P, E*)-6]**

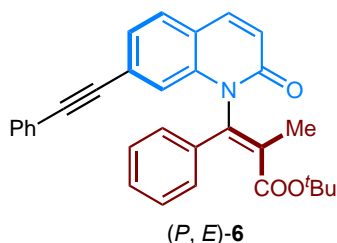

Brown oil. (85% yield). <sup>1</sup>H NMR (500 MHz, Chloroform-*d*) δ 7.70 (d, *J* = 9.6 Hz, 1H), 7.57 – 7.53 (m, 4H), 7.44 – 7.42 (m, 2H), 7.37 (dd, *J* = 6.3, 2.4 Hz, 4H), 7.29 – 7.28 (m, 3H), 6.70 (d, *J* = 9.5 Hz, 1H), 1.82 (s, 3H), 1.34 (s, 9H). <sup>13</sup>C NMR (126 MHz,

Chloroform-*d*)  $\delta$  168.10, 160.66, 139.46, 139.09, 137.39, 136.56, 134.01, 131.80, 128.84, 128.76, 128.69, 128.56, 128.46, 128.16, 126.02, 126.02, 122.80, 122.62, 120.21, 117.84, 91.98, 88.96, 82.04, 27.66, 16.52. HRMS(ESI) *m/z*: calculated for  $[C_{31}H_{27}NO_3+H]^+$  462.2064, found 462.2062. HPLC data (Chiralpak AD column, hexane: isopropanol = 85:15, 1.0 mL/min), *tr* = 6.4 min (major), *tr* = 9.3 min (minor), *ee* = 92%

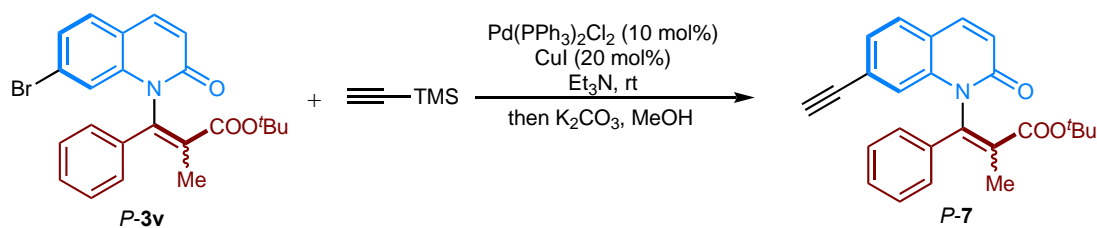

The first step of the reaction was proceeded under argon atmosphere. The Compound (*P, Z*)-**3v**/*(P, E)*-**3v** (0.1 mmol), trimethylsilyl acetylene (0.2 mmol), Pd(PPh<sub>3</sub>)<sub>2</sub>Cl<sub>2</sub> (10 mol%) and CuI (20 mol%) were weighed out into a 2 dram scintillation vial equipped with a magnetic stirring bar. The vial was then charged with Et<sub>3</sub>N (0.75 mL) and stirred at room temperature for overnight. The solvent in the vial was removed by distillation under reduced pressure at room temperature. Then the crude was dissolved in MeOH (1.0 mL) before K<sub>2</sub>CO<sub>3</sub> (0.2 mmol) was added. After 30 minutes, the mixture was concentrated by reduced pressure at room temperature. The crude product was purified by column chromatography over silica gel (PE: EA= 10:1 to 4:1) to afford the desired product (*P, Z*)-**7**/*(P, E)*-**7**.

**(*P, Z*)-tert-butyl (Z)-3-(7-ethynyl-2-oxoquinolin-1(2H)-yl)-2-methyl-3-phenylacrylate [(*P, Z*)-7]**

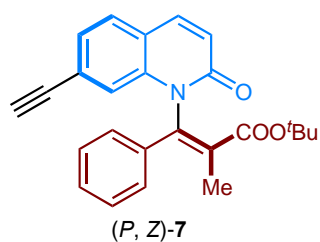

White solid. (81% yield). <sup>1</sup>H NMR (500 MHz, Chloroform-*d*)  $\delta$  7.68 (d, *J* = 9.5 Hz, 1H), 7.49 – 7.44 (m, 4H), 7.33 (qd, *J* = 7.7, 6.7, 3.6 Hz, 3H), 7.29 – 7.26 (m, 1H), 6.71

(d,  $J = 9.5$  Hz, 1H), 3.19 (s, 1H), 2.28 (s, 3H), 1.06 (s, 9H).  $^{13}\text{C}$  NMR (126 MHz, Chloroform- $d$ )  $\delta$  166.46, 161.26, 140.03, 139.15, 136.54, 135.71, 133.17, 129.28, 129.00, 128.38, 128.32, 125.87, 124.23, 123.24, 120.52, 119.45, 83.17, 81.52, 79.50, 27.46, 17.56. HRMS(ESI)  $m/z$ : calculated for  $[\text{C}_{25}\text{H}_{23}\text{NO}_3+\text{H}]^+$  386.1751, found 386.1734. HPLC data (Chiralpak AD column, hexane: isopropanol = 70:30, 1.0 mL/min),  $t_r = 4.9$  min (minor),  $t_r = 12.7$  min (major), ee = 86%.

(*P*, *E*)- *tert*-butyl (*E*)-3-(7-ethynyl-2-oxoquinolin-1(2*H*)-yl)-2-methyl-3-phenylacrylate [(*P*, *E*)-7]

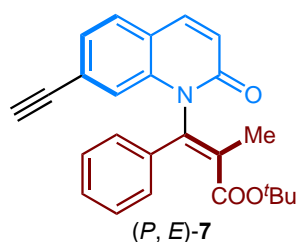

White solid. (94% yield).  $^1\text{H}$  NMR (500 MHz, Chloroform- $d$ )  $\delta$  7.70 (d,  $J = 9.6$  Hz, 1H), 7.53 – 7.51 (m, 2H), 7.40 (dd,  $J = 6.7, 3.0$  Hz, 2H), 7.32 (dd,  $J = 8.0, 1.4$  Hz, 1H), 7.27 (dd,  $J = 6.5, 2.5$  Hz, 3H), 6.71 (d,  $J = 9.5$  Hz, 1H), 3.22 (s, 1H), 1.79 (s, 3H), 1.32 (s, 9H).  $^{13}\text{C}$  NMR (126 MHz, Chloroform- $d$ )  $\delta$  167.99, 160.58, 139.38, 138.92, 137.29, 136.53, 134.10, 128.79, 128.71, 128.56, 128.18, 126.30, 124.71, 123.21, 120.65, 118.67, 83.05, 82.08, 79.78, 27.65, 16.48. HRMS(ESI)  $m/z$ : calculated for  $[\text{C}_{25}\text{H}_{23}\text{NO}_3+\text{H}]^+$  386.1751, found 386.1739. HPLC data (Chiralpak AD column, hexane: isopropanol = 95:5, 1.0 mL/min),  $t_r = 21.0$  min (major),  $t_r = 25.9$  min (minor), ee = 93%.

### Photocatalyzed *Z/E* isomerization of non atropisomeric substrates

In order to show whether the non atropisomeric substrates could be tolerated to the photocatalyzed *Z/E* isomerization, we performed the DABCO-catalyzed reaction of MBH carbonates **1a** with 3,4-dihydroquinolin-2(1*H*)-one followed by MeONa-promoted isomerization. Since the non-planarity of *Z*-**S4**, in this case, *Z*-**S4** is non atropisomeric compounds. When *Z*-**S4** was subjected into our photocatalysis system, the reaction proceeded smoothly to afford *E/Z* ratio of 7/1. This result indicated that our photocatalysis reaction can be used for the non atropisomeric substrates. More efforts

on the exploration of different kinds of substrates is currently in progress in our laboratory.

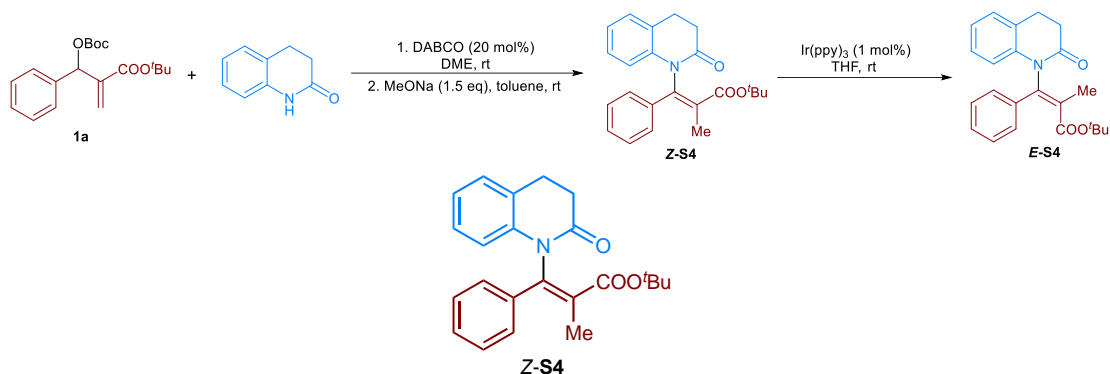

Following the general procedure of **D**, **Z-S4** was obtained as white solid (86% yield). <sup>1</sup>H NMR (500 MHz, Chloroform-*d*) δ 7.41 – 7.39 (m, 2H), 7.29 (t, *J* = 7.2 Hz, 2H), 7.27 – 7.24 (m, 1H), 7.14 – 7.09 (m, 2H), 7.00 (d, *J* = 8.1 Hz, 1H), 6.92 (t, *J* = 7.4 Hz, 1H), 2.99 – 2.88 (m, 2H), 2.76 (dt, *J* = 15.6, 5.6 Hz, 1H), 2.65 (ddd, *J* = 15.6, 11.8, 6.3 Hz, 1H), 2.17 (s, 3H), 1.29 (s, 9H). <sup>13</sup>C NMR (126 MHz, Chloroform-*d*) δ 169.48, 167.09, 139.79, 137.13, 136.37, 132.31, 129.25, 128.59, 128.19, 127.57, 127.21, 126.00, 123.00, 117.44, 81.12, 32.44, 27.87, 25.51, 17.38. HRMS(ESI) *m/z*: calculated for [C<sub>23</sub>H<sub>25</sub>NO<sub>3</sub>+H]<sup>+</sup> 364.1907, found 364.1905.

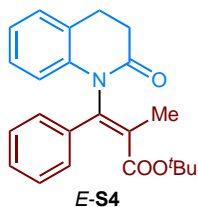

Following the general procedure of **F**, **E-S4** was obtained as white solid (78% yield). <sup>1</sup>H NMR (500 MHz, Chloroform-*d*) δ 7.36 – 7.34 (m, 2H), 7.26 – 7.24 (m, 3H), 7.20 – 7.16 (m, 2H), 7.02 (d, *J* = 7.9 Hz, 1H), 6.99 (td, *J* = 7.4, 1.2 Hz, 1H), 3.01 – 2.91 (m, 2H), 2.78 – 2.67 (m, 2H), 1.85 (s, 3H), 1.27 (s, 9H). <sup>13</sup>C NMR (126 MHz, Chloroform-*d*) δ 168.75, 168.40, 139.00, 138.16, 137.42, 133.09, 128.40, 128.38, 128.00, 127.96, 127.71, 125.93, 123.39, 116.43, 81.61, 32.21, 27.57, 25.63, 16.59. HRMS(ESI) *m/z*: calculated for [C<sub>23</sub>H<sub>25</sub>NO<sub>3</sub>+H]<sup>+</sup> 364.1907, found 364.1907.

## Density functional theory studies

The Gaussian 09 program was used for all the density functional theory (DFT) calculations.<sup>[1]</sup> Geometry optimizations were optimized in toluene (for the isomerization) and tetrahydrofuran (THF, for the photochemical *Z/E* isomerization) with the SMD solvation model, and these calculations were carried out at the M06-2X<sup>[2]</sup> level of theory with the def2-SVP<sup>[3]</sup> basis set used for all atoms. Vibrational frequency calculations were performed at the same level to obtain thermal energy correction, and to confirm the stationary point is an energy minimum or a transition state. The single-point energies in THF and toluene were calculated using the SMD solvation model<sup>[4]</sup> at the M06-2X and def2-TZVPP basis set level of theory. The minimum energy crossing point were calculated with sobMECP program<sup>[5]</sup> with M06-2X/def2-TZVPP level. The vertical excitation energy was performed with TDDFT method with def2-TZVPP basis set. The spin density plot was generated by the Multiwfn program.<sup>[6]</sup> Distances are shown in angstroms [Å].

The DFT calculations of MeONa-promoted isomerization of **Int-3** to accessing (*P*, *Z*)-**3a** were shown in Supplementary Fig. 5A. Based on our previous reports on stereospecific isomerization of allylic alkenes (refs 34-38 in manuscript), we proposed that the isomerization was occurred from the conformer **3a1** and **3a2**. With the NaOMe was added in the reaction system, the coordination between amide carbonyl with sodium cation would occur to generate **3a1-1** and **3a2-1**. Our calculation results indicated that the **3a2-1** (-5.9 kcal/mol) was more stable than **3a1-1** (-4.5 kcal/mol). The comparison between **3a1-TS1** and **3a2-TS1** as well as **3aTS-NaOMe** implies that the deprotonation prefers to take place via **3a2-TS1** rather than **3a1-TS1**. Afterward, the reprotonation occurs to afford (*P*, *Z*)-**3a**·NaOMe via **3a2-TS2** (-11.6 kcal/mol).

In addition, we also calculated the energy profiles taken place from the other two conformers **3a3** and **3a4**, respectively (Supplementary Fig. 5B). It can be seen that the energies of **3a3-TS1** and **3a4-TS1** are far higher than that of **3a1-TS1** and **3a2-TS1**. These results indicate that the isomerization of **Int-3** taken place from conformer **3a3** and **3a4** are not likely. Thus, the isomerization affords the axially chiral molecules *P*-

**3a** as the major product rather than *M*-**3a**. This result is consistent with our experimental outcome illustrated in **Fig. 2** of manuscript.

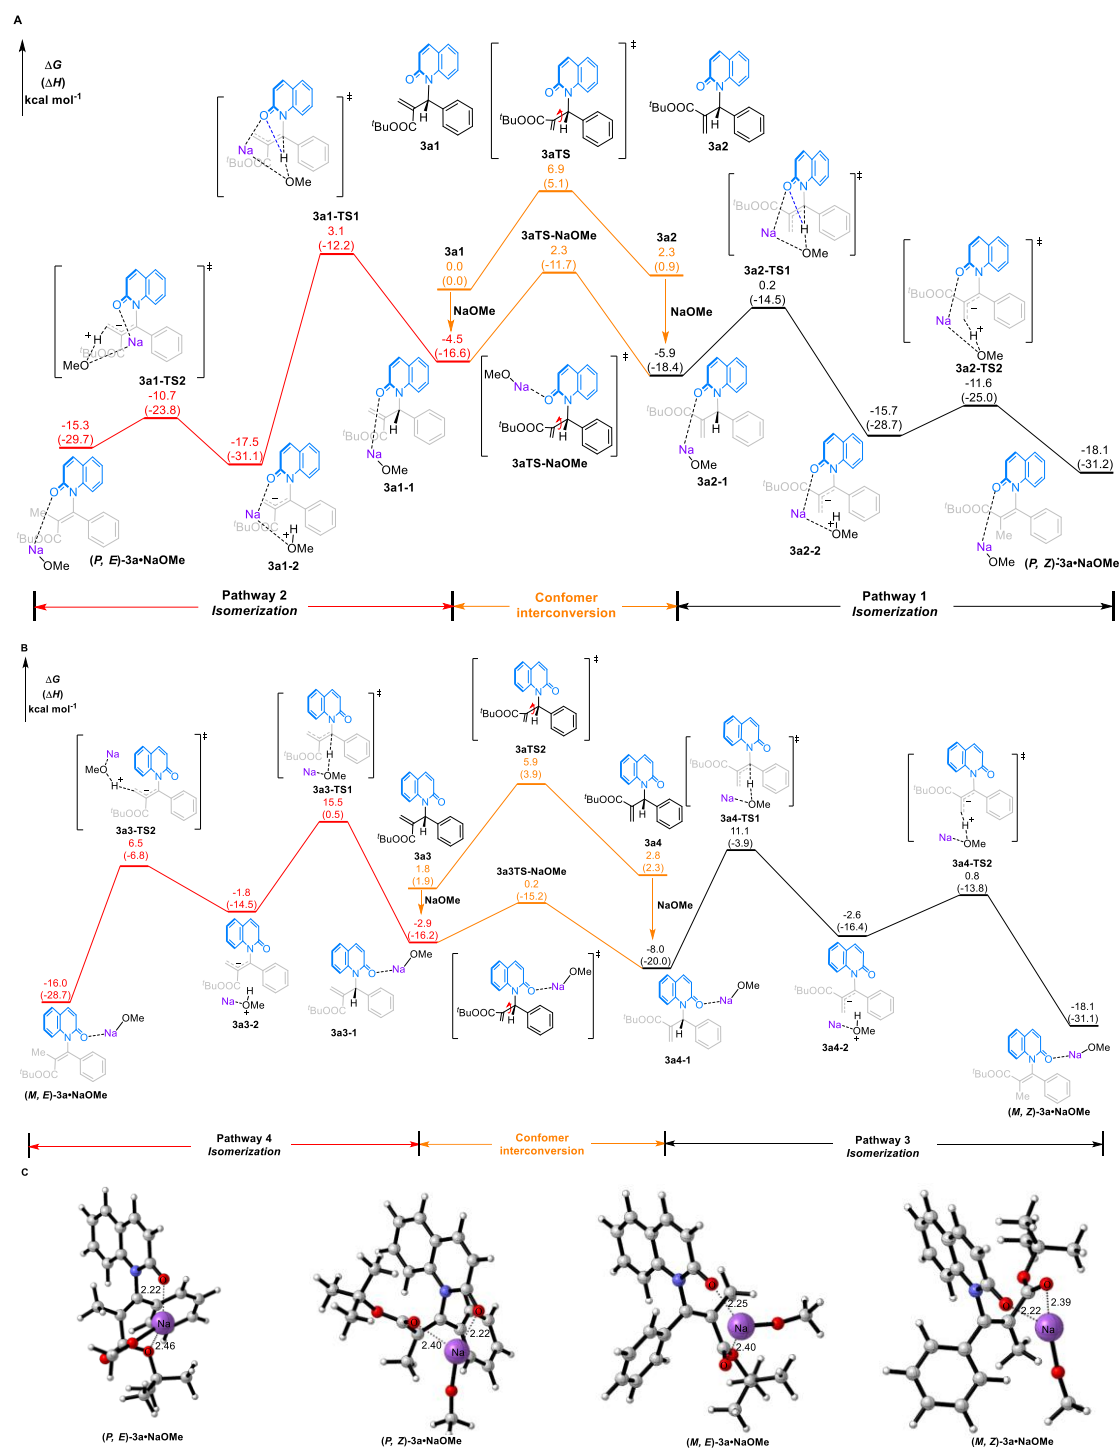

**Supplementary Fig. 5. Free energy profiles of MeONa-promoted stereospecific isomerization of Int-3 to accessing (*P*, *Z*)-**3a**. A Isomerization from conformer **3a1** or **3a2**. B Isomerization from conformer **3a3** or **3a4**. C The key optimized structures.**



We then performed the DFT studies of photocatalyzed *Z/E* isomerization of (*P, Z*)-**3a**. The results of vertical excitation energy show that the photoexcitation of (*P, Z*)-**3a** is easier than (*P, E*)-**3a**, and  $T_1$  state can be reached after intersystem crossing (ISC). For subsequent relaxation from  $T_1$  to  $S_0$ , we calculated the minimum energy intersection (MECP) between singlet and triplet surfaces using the sob-MECP program. For (*P, Z*)-**3a** and (*P, E*)-**3a**, the MECP structure is 5.2 and 4.9 kcal/mol higher than the twisted intermediate ( $T_1$ ), respectively. From this result in Supplementary Fig. 6, it can be seen that (*P, Z*)-**3a** is more easily excited to the  $T_1$  state and tends to generate a more stable configuration (*P, E*)-**3a** through the crossing point. On the other hand, the spin density plot of **III** shows that the radical electrons are distributed on the aromatic ring.

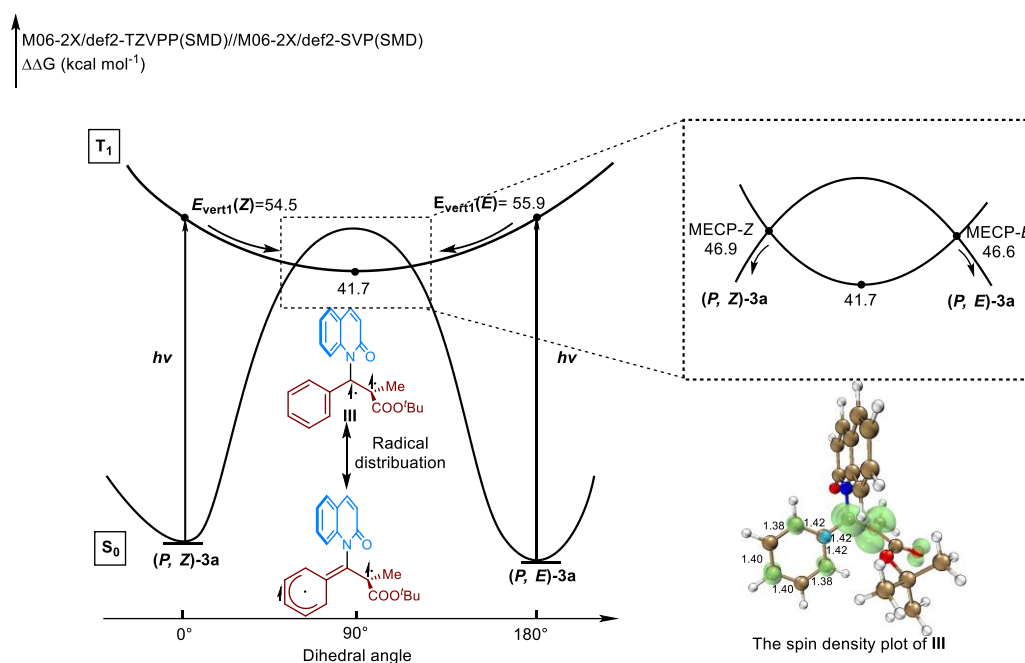

**Supplementary Fig. 6. The energy profiles of the photocatalytic reaction.**

The explicit solvent effect was calculated by TDDFT method which is shown in Supplementary Table 1. The ratios were consistent with our experimental results illustrated in manuscript.

**Supplementary Table 1.** Vertical excitation energy of different isomers and solvent molecules (in kcal mol<sup>-1</sup>).

| Entry     | $E_{\text{vert}}(E)$ | $E_{\text{vert}}(Z)$ |
|-----------|----------------------|----------------------|
| With MeOH | 58.4                 | 57.8                 |

|              |      |      |
|--------------|------|------|
| With THF     | 56.9 | 55.8 |
| With Toluene | 55.6 | 55.2 |

**Supplementary Table 2.** Thermal correction of Enthalpy and Gibbs free energy (TCE and TCG, hartree) and total electronic energies (E, hartree) in toluene for all species involved in this study. The intermediate and transition states were calculated at the M06-2X/def2-TZVPP/SMD-(Toluene)//M06-2X/def2-SVP/SMD-(Toluene) level of theory.

| Compounds              | TCE      | TCG      | E            |
|------------------------|----------|----------|--------------|
| <b>NaOMe</b>           | 0.045149 | 0.012497 | -277.4064432 |
| <b>3a1</b>             | 0.438288 | 0.358787 | -1170.731468 |
| <b>3aTS</b>            | 0.437239 | 0.360602 | -1170.722314 |
| <b>3a2</b>             | 0.438364 | 0.361189 | -1170.730117 |
| <b>3a1-1</b>           | 0.485514 | 0.392652 | -1448.166390 |
| <b>3aTS-NaOMe</b>      | 0.484892 | 0.395100 | -1448.157991 |
| <b>3a2-1</b>           | 0.485205 | 0.392980 | -1448.168932 |
| <b>3a1-TS1</b>         | 0.480178 | 0.392450 | -1448.154077 |
| <b>3a1-2</b>           | 0.483529 | 0.393073 | -1448.187525 |
| <b>3a1-TS2</b>         | 0.479115 | 0.387895 | -1448.171556 |
| <b>(P, E)-3a-NaOMe</b> | 0.484851 | 0.395727 | -1448.186718 |
| <b>3a2-TS1</b>         | 0.480026 | 0.391227 | -1448.157532 |
| <b>3a2-2</b>           | 0.484928 | 0.393487 | -1448.185078 |
| <b>3a2-TS2</b>         | 0.479195 | 0.388419 | -1448.173537 |
| <b>(P, Z)-3a-NaOMe</b> | 0.484847 | 0.393615 | -1448.189089 |
| <b>3a3</b>             | 0.438122 | 0.358344 | -1170.728184 |
| <b>3aTS2</b>           | 0.437635 | 0.361372 | -1170.724575 |
| <b>3a4</b>             | 0.438023 | 0.359198 | -1170.727415 |
| <b>3a3-1</b>           | 0.485654 | 0.394729 | -1448.165981 |
| <b>3a3TS-NaOMe</b>     | 0.484555 | 0.397043 | -1448.163278 |
| <b>3a4-1</b>           | 0.485634 | 0.392467 | -1448.171902 |
| <b>3a3-TS1</b>         | 0.480375 | 0.392067 | -1448.134042 |
| <b>3a3-2</b>           | 0.485527 | 0.393580 | -1448.163125 |
| <b>3a3-TS2</b>         | 0.479335 | 0.388389 | -1448.144719 |
| <b>(M, E)-3a-NaOMe</b> | 0.484709 | 0.392777 | -1448.184928 |
| <b>3a4-TS1</b>         | 0.480084 | 0.391947 | -1448.140819 |
| <b>3a4-2</b>           | 0.485241 | 0.395111 | -1448.165887 |
| <b>3a4-TS2</b>         | 0.478226 | 0.389346 | -1448.154768 |
| <b>(M, Z)-3a-NaOMe</b> | 0.484811 | 0.393241 | -1448.188844 |

## X-ray crystal structures

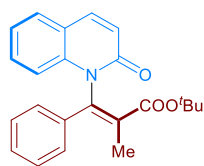

(P,Z)-3a

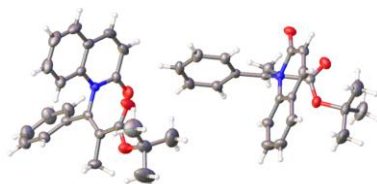

CCDC 2082917

### Supplementary Table 3. Crystal data and structure refinement for 2082917.

|                                             |                                                               |
|---------------------------------------------|---------------------------------------------------------------|
| Identification code                         | 2082917                                                       |
| Empirical formula                           | C <sub>23</sub> H <sub>23</sub> NO <sub>3</sub>               |
| Formula weight                              | 361.42                                                        |
| Temperature/K                               | 273.15                                                        |
| Crystal system                              | orthorhombic                                                  |
| Space group                                 | P2 <sub>1</sub> 2 <sub>1</sub> 2 <sub>1</sub>                 |
| a/Å                                         | 9.2486(8)                                                     |
| b/Å                                         | 13.0118(12)                                                   |
| c/Å                                         | 33.021(3)                                                     |
| α/°                                         | 90                                                            |
| β/°                                         | 90                                                            |
| γ/°                                         | 90                                                            |
| Volume/Å <sup>3</sup>                       | 3973.8(6)                                                     |
| Z                                           | 8                                                             |
| ρ <sub>calc</sub> /cm <sup>3</sup>          | 1.208                                                         |
| μ/mm <sup>-1</sup>                          | 0.638                                                         |
| F(000)                                      | 1536.0                                                        |
| Crystal size/mm <sup>3</sup>                | 0.12 × 0.1 × 0.1                                              |
| Radiation                                   | CuKα (λ = 1.54178)                                            |
| 2θ range for data collection/°              | 7.302 to 138.084                                              |
| Index ranges                                | -10 ≤ h ≤ 11, -15 ≤ k ≤ 12, -35 ≤ l ≤ 39                      |
| Reflections collected                       | 17077                                                         |
| Independent reflections                     | 6919 [R <sub>int</sub> = 0.0291, R <sub>sigma</sub> = 0.0295] |
| Data/restraints/parameters                  | 6919/6/495                                                    |
| Goodness-of-fit on F <sup>2</sup>           | 1.027                                                         |
| Final R indexes [I ≥ 2σ (I)]                | R <sub>1</sub> = 0.0331, wR <sub>2</sub> = 0.0825             |
| Final R indexes [all data]                  | R <sub>1</sub> = 0.0393, wR <sub>2</sub> = 0.0857             |
| Largest diff. peak/hole / e Å <sup>-3</sup> | 0.14/-0.19                                                    |
| Flack parameter                             | -0.04(7)                                                      |

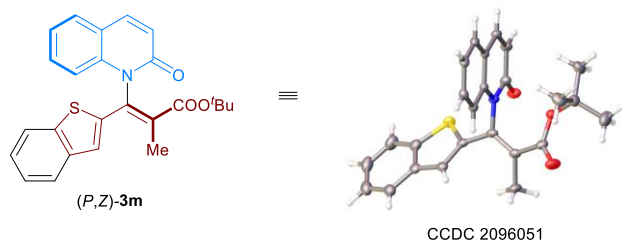

**Supplementary Table 4. Crystal data and structure refinement for 2096051.**

|                                             |                                                               |
|---------------------------------------------|---------------------------------------------------------------|
| Identification code                         | 2096051                                                       |
| Empirical formula                           | C <sub>25</sub> H <sub>23</sub> NO <sub>3</sub> S             |
| Formula weight                              | 417.50                                                        |
| Temperature/K                               | 100.15                                                        |
| Crystal system                              | hexagonal                                                     |
| Space group                                 | P6 <sub>5</sub>                                               |
| a/Å                                         | 20.77790(10)                                                  |
| b/Å                                         | 20.77790(10)                                                  |
| c/Å                                         | 9.16930(10)                                                   |
| α/°                                         | 90                                                            |
| β/°                                         | 90                                                            |
| γ/°                                         | 120                                                           |
| Volume/Å <sup>3</sup>                       | 3428.23(5)                                                    |
| Z                                           | 6                                                             |
| ρ <sub>calc</sub> /cm <sup>3</sup>          | 1.213                                                         |
| μ/mm <sup>-1</sup>                          | 1.456                                                         |
| F(000)                                      | 1320.0                                                        |
| Crystal size/mm <sup>3</sup>                | 0.05 × 0.05 × 0.05                                            |
| Radiation                                   | CuKα (λ = 1.54184)                                            |
| 2θ range for data collection/°              | 4.91 to 133.124                                               |
| Index ranges                                | -24 ≤ h ≤ 24, -24 ≤ k ≤ 24, -10 ≤ l ≤ 8                       |
| Reflections collected                       | 35983                                                         |
| Independent reflections                     | 3724 [R <sub>int</sub> = 0.0351, R <sub>sigma</sub> = 0.0166] |
| Data/restraints/parameters                  | 3724/1/275                                                    |
| Goodness-of-fit on F <sup>2</sup>           | 1.042                                                         |
| Final R indexes [I ≥ 2σ (I)]                | R <sub>1</sub> = 0.0225, wR <sub>2</sub> = 0.0602             |
| Final R indexes [all data]                  | R <sub>1</sub> = 0.0228, wR <sub>2</sub> = 0.0605             |
| Largest diff. peak/hole / e Å <sup>-3</sup> | 0.15/-0.15                                                    |
| Flack parameter                             | 0.004(4)                                                      |

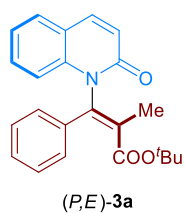

≡

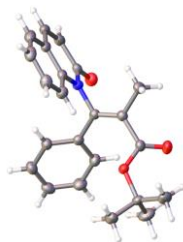

CCDC 2252177

**Supplementary Table 5. Crystal data and structure refinement for 2252177.**

|                                             |                                                               |
|---------------------------------------------|---------------------------------------------------------------|
| Identification code                         | 2252177                                                       |
| Empirical formula                           | C <sub>23</sub> H <sub>23</sub> NO <sub>3</sub>               |
| Formula weight                              | 361.42                                                        |
| Temperature/K                               | 193.15                                                        |
| Crystal system                              | orthorhombic                                                  |
| Space group                                 | P2 <sub>1</sub> 2 <sub>1</sub> 2 <sub>1</sub>                 |
| a/Å                                         | 8.743                                                         |
| b/Å                                         | 9.380                                                         |
| c/Å                                         | 23.078                                                        |
| α/°                                         | 90                                                            |
| β/°                                         | 90                                                            |
| γ/°                                         | 90                                                            |
| Volume/Å <sup>3</sup>                       | 1892.6                                                        |
| Z                                           | 4                                                             |
| ρ <sub>calc</sub> /cm <sup>3</sup>          | 1.268                                                         |
| μ/mm <sup>-1</sup>                          | 0.670                                                         |
| F(000)                                      | 768.0                                                         |
| Crystal size/mm <sup>3</sup>                | 0.13 × 0.12 × 0.11                                            |
| Radiation                                   | CuKα (λ = 1.54184)                                            |
| 2θ range for data collection/°              | 7.662 to 136.456                                              |
| Index ranges                                | -10 ≤ h ≤ 10, -11 ≤ k ≤ 11, -27 ≤ l ≤ 27                      |
| Reflections collected                       | 41759                                                         |
| Independent reflections                     | 3461 [R <sub>int</sub> = 0.0288, R <sub>sigma</sub> = 0.0180] |
| Data/restraints/parameters                  | 3461/0/248                                                    |
| Goodness-of-fit on F <sup>2</sup>           | 1.144                                                         |
| Final R indexes [I ≥ 2σ (I)]                | R <sub>1</sub> = 0.0307, wR <sub>2</sub> = 0.0771             |
| Final R indexes [all data]                  | R <sub>1</sub> = 0.0308, wR <sub>2</sub> = 0.0772             |
| Largest diff. peak/hole / e Å <sup>-3</sup> | 0.17/-0.25                                                    |
| Flack parameter                             | 0.02(2)                                                       |

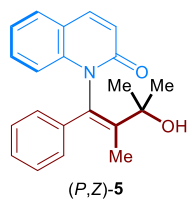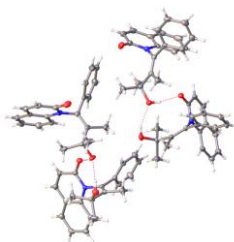

CCDC 2286999

**Supplementary Table 6. Crystal data and structure refinement for 2286999.**

|                                             |                                                                |
|---------------------------------------------|----------------------------------------------------------------|
| Identification code                         | 2286999                                                        |
| Empirical formula                           | C <sub>84</sub> H <sub>84</sub> N <sub>4</sub> O <sub>8</sub>  |
| Formula weight                              | 1277.55                                                        |
| Temperature/K                               | 100.01(10)                                                     |
| Crystal system                              | orthorhombic                                                   |
| Space group                                 | P2 <sub>1</sub> 2 <sub>1</sub> 2 <sub>1</sub>                  |
| a/Å                                         | 27.8477(3)                                                     |
| b/Å                                         | 18.7127(2)                                                     |
| c/Å                                         | 13.05830(10)                                                   |
| α/°                                         | 90                                                             |
| β/°                                         | 90                                                             |
| γ/°                                         | 90                                                             |
| Volume/Å <sup>3</sup>                       | 6804.76(12)                                                    |
| Z                                           | 4                                                              |
| ρ <sub>calc</sub> /cm <sup>3</sup>          | 1.247                                                          |
| μ/mm <sup>-1</sup>                          | 0.631                                                          |
| F(000)                                      | 2720.0                                                         |
| Crystal size/mm <sup>3</sup>                | 0.02 × 0.02 × 0.02                                             |
| Radiation                                   | CuKα (λ = 1.54184)                                             |
| 2θ range for data collection/°              | 5.69 to 148.156                                                |
| Index ranges                                | -34 ≤ h ≤ 34, -19 ≤ k ≤ 23, -16 ≤ l ≤ 16                       |
| Reflections collected                       | 48017                                                          |
| Independent reflections                     | 13620 [R <sub>int</sub> = 0.0651, R <sub>sigma</sub> = 0.0462] |
| Data/restraints/parameters                  | 13620/0/881                                                    |
| Goodness-of-fit on F <sup>2</sup>           | 1.077                                                          |
| Final R indexes [I ≥ 2σ (I)]                | R <sub>1</sub> = 0.0551, wR <sub>2</sub> = 0.1392              |
| Final R indexes [all data]                  | R <sub>1</sub> = 0.0623, wR <sub>2</sub> = 0.1424              |
| Largest diff. peak/hole / e Å <sup>-3</sup> | 0.29/-0.28                                                     |
| Flack parameter                             | -0.09(12)                                                      |

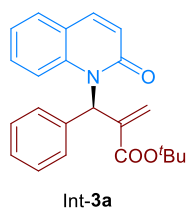

≡

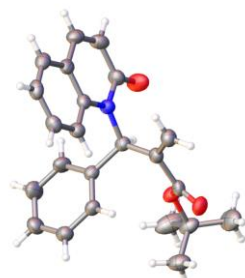

CCDC 2089101

**Supplementary Table 7. Crystal data and structure refinement for 2089101.**

|                                             |                                                               |
|---------------------------------------------|---------------------------------------------------------------|
| Identification code                         | 2089101                                                       |
| Empirical formula                           | C <sub>23</sub> H <sub>23</sub> NO <sub>3</sub>               |
| Formula weight                              | 361.42                                                        |
| Temperature/K                               | 273(2)                                                        |
| Crystal system                              | orthorhombic                                                  |
| Space group                                 | P2 <sub>1</sub> 2 <sub>1</sub> 2 <sub>1</sub>                 |
| a/Å                                         | 10.2957(12)                                                   |
| b/Å                                         | 12.117(2)                                                     |
| c/Å                                         | 16.365(3)                                                     |
| α/°                                         | 90                                                            |
| β/°                                         | 90                                                            |
| γ/°                                         | 90                                                            |
| Volume/Å <sup>3</sup>                       | 2041.6(6)                                                     |
| Z                                           | 4                                                             |
| ρ <sub>calc</sub> /cm <sup>3</sup>          | 1.176                                                         |
| μ/mm <sup>-1</sup>                          | 0.621                                                         |
| F(000)                                      | 768.0                                                         |
| Crystal size/mm <sup>3</sup>                | 0.12 × 0.11 × 0.08                                            |
| Radiation                                   | CuKα (λ = 1.54178)                                            |
| 2θ range for data collection/°              | 9.08 to 136.812                                               |
| Index ranges                                | -12 ≤ h ≤ 12, -14 ≤ k ≤ 14, -19 ≤ l ≤ 19                      |
| Reflections collected                       | 15331                                                         |
| Independent reflections                     | 3690 [R <sub>int</sub> = 0.0312, R <sub>sigma</sub> = 0.0215] |
| Data/restraints/parameters                  | 3690/0/248                                                    |
| Goodness-of-fit on F <sup>2</sup>           | 1.050                                                         |
| Final R indexes [I ≥ 2σ (I)]                | R <sub>1</sub> = 0.0262, wR <sub>2</sub> = 0.0703             |
| Final R indexes [all data]                  | R <sub>1</sub> = 0.0264, wR <sub>2</sub> = 0.0705             |
| Largest diff. peak/hole / e Å <sup>-3</sup> | 0.12/-0.12                                                    |
| Flack parameter                             | 0.03(4)                                                       |

## NMR spectrum data

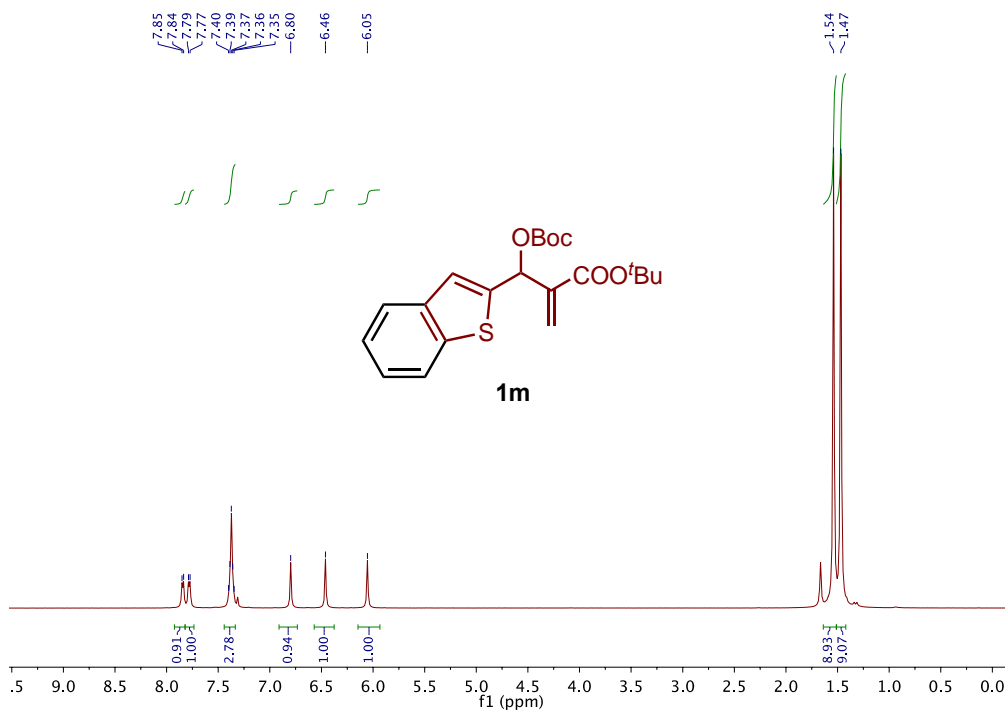

Supplementary Fig. 7. <sup>1</sup>H NMR spectrum of **1m**.

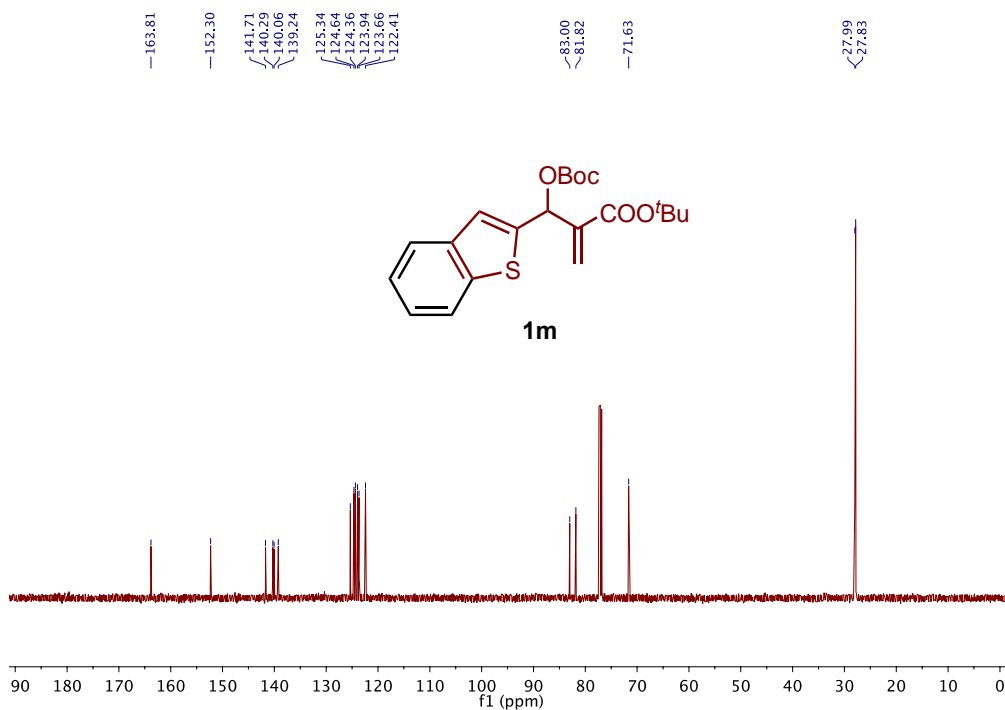

Supplementary Fig. 8. <sup>13</sup>C NMR spectrum of **1m**.



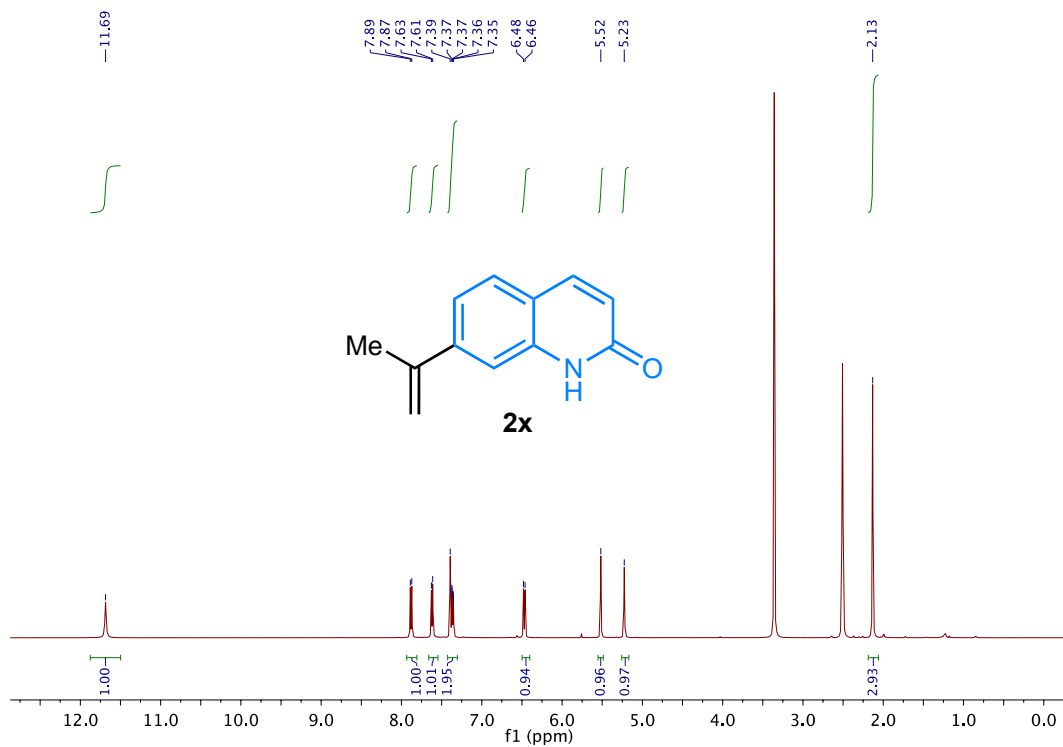

Supplementary Fig. 9. <sup>1</sup>H NMR spectrum of **2x**.

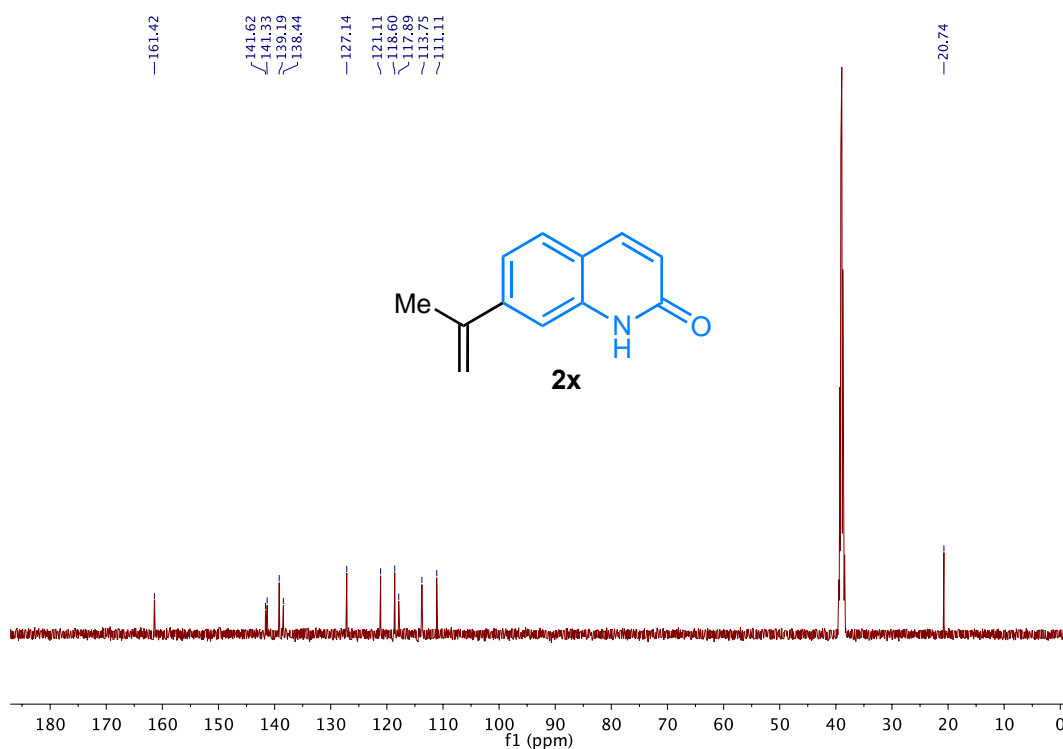

Supplementary Fig. 10. <sup>13</sup>C NMR spectrum of **2x**.

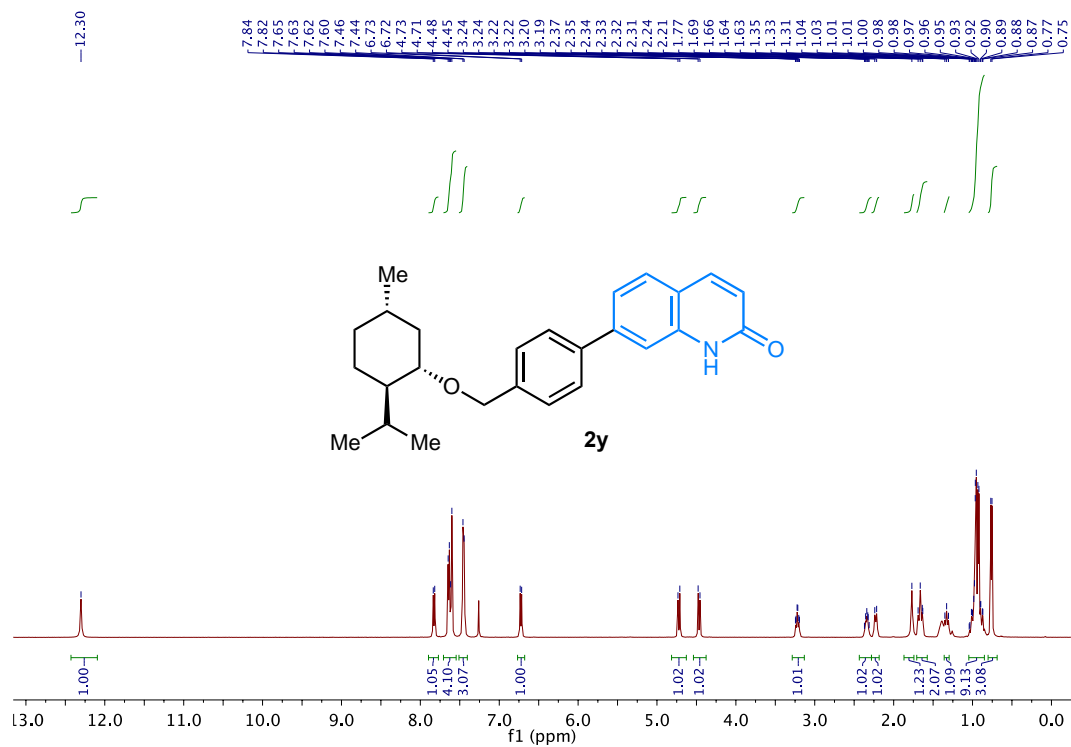

Supplementary Fig. 11. <sup>1</sup>H NMR spectrum of **2y**.

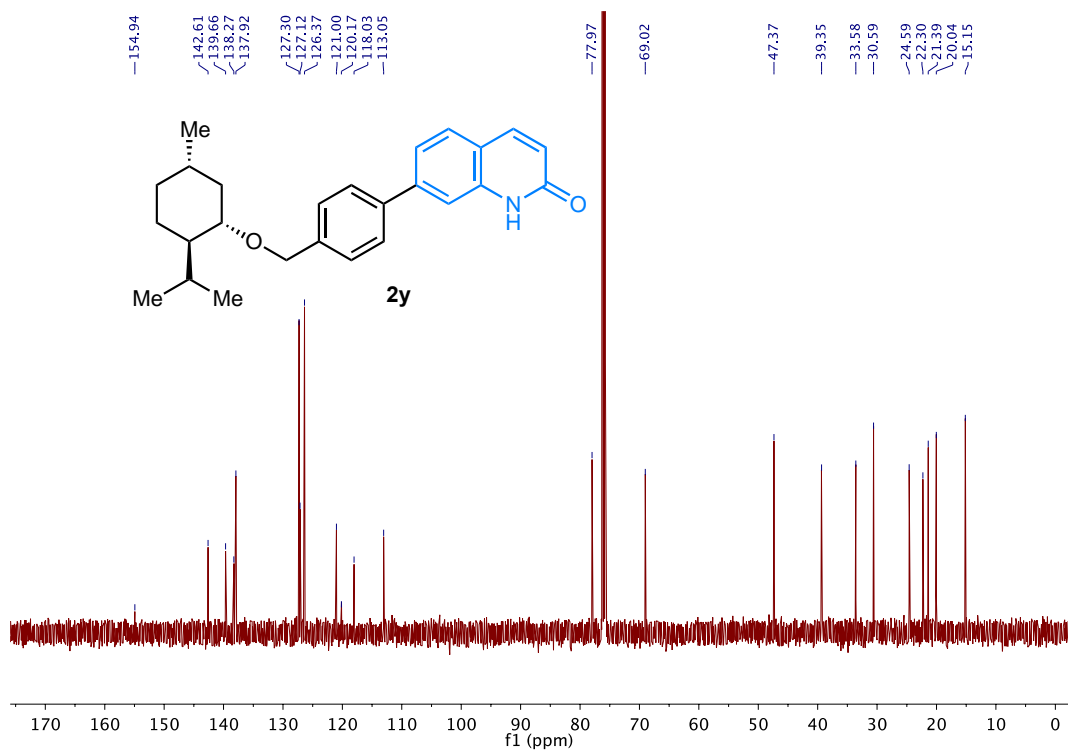

Supplementary Fig. 12. <sup>13</sup>C NMR spectrum of **2y**.

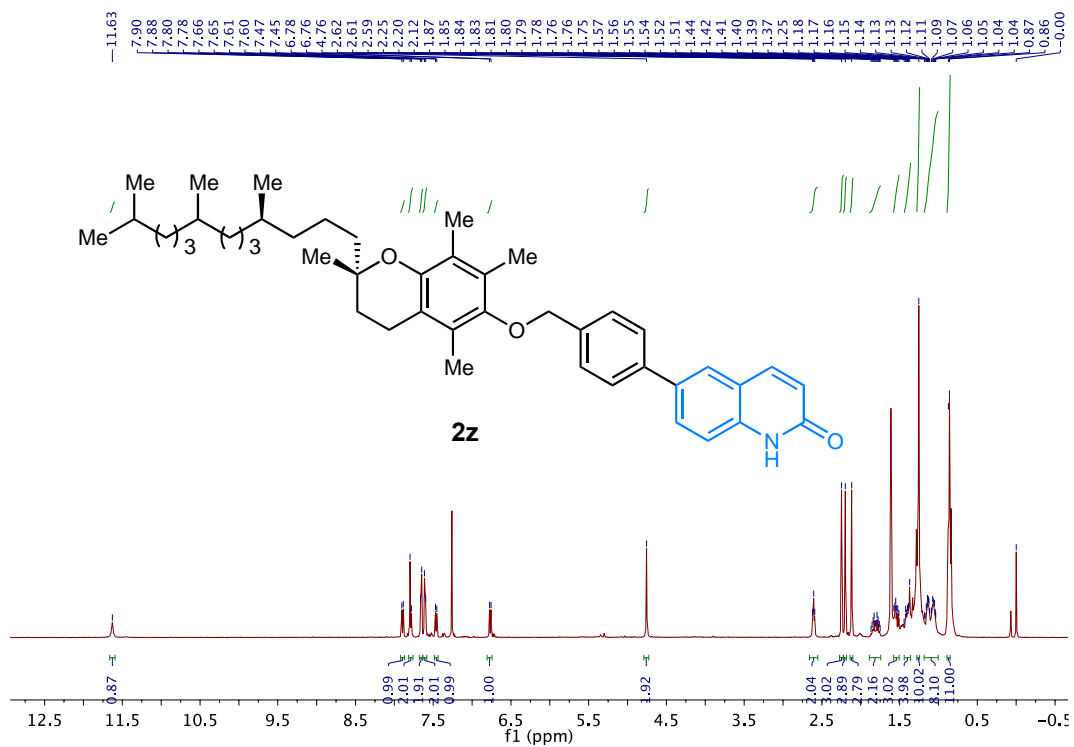

Supplementary Fig. 13.  $^1\text{H}$  NMR spectrum of **2z**.

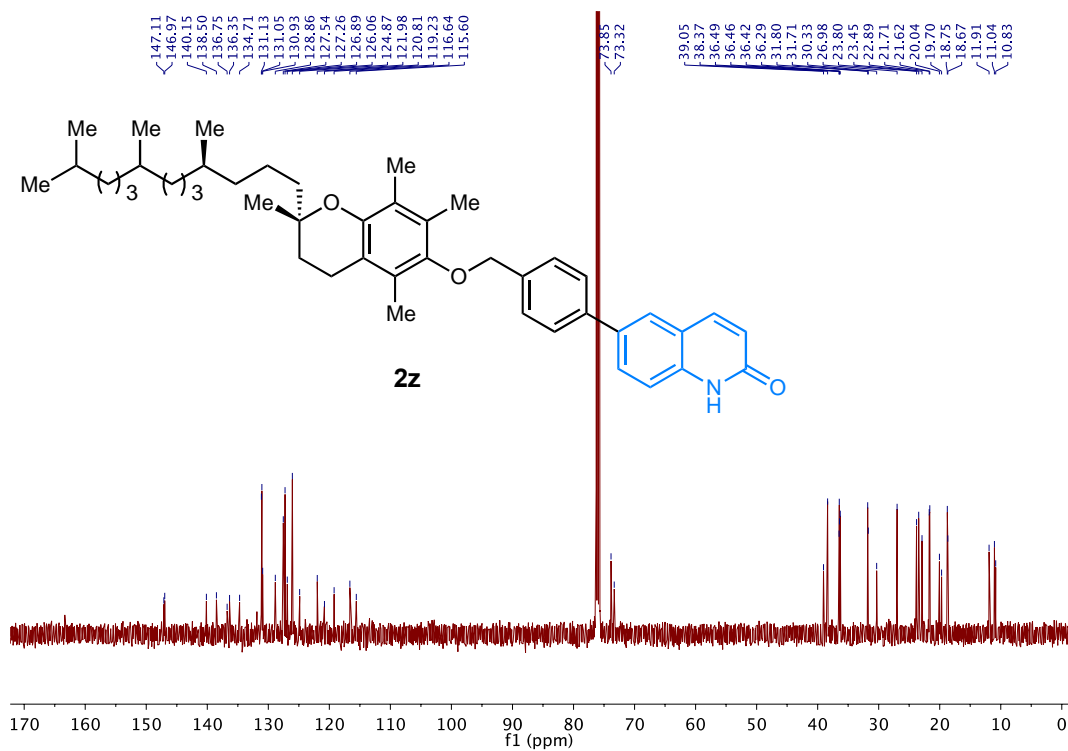

Supplementary Fig. 14.  $^{13}\text{C}$  NMR spectrum of **2z**.

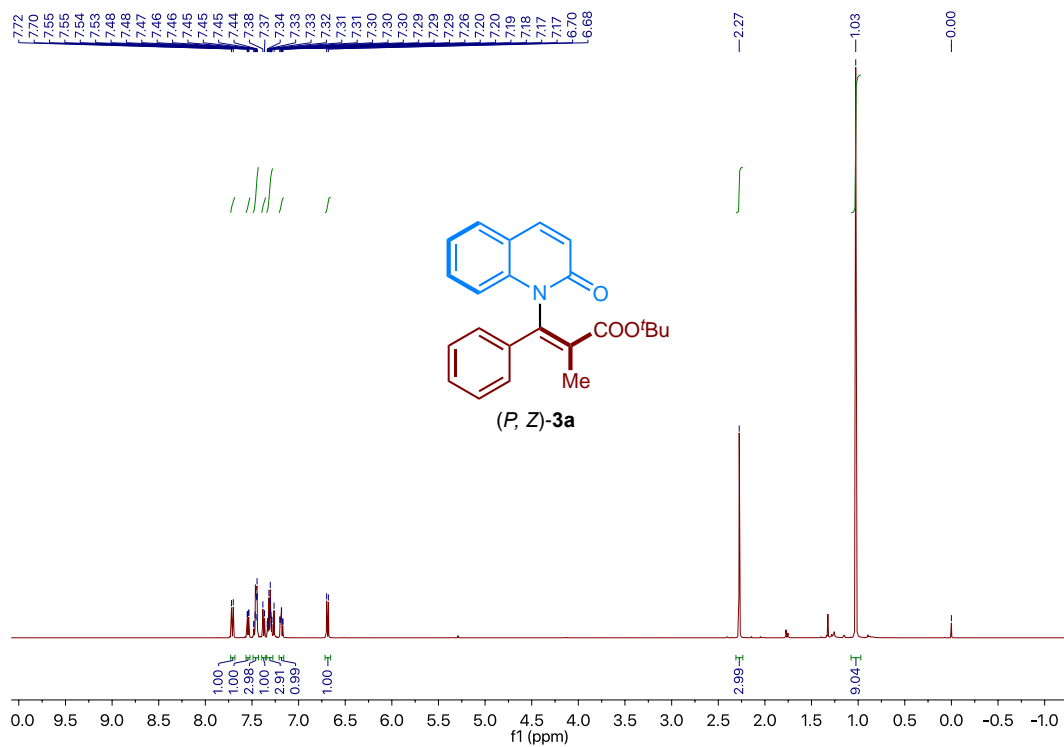

Supplementary Fig. 15. <sup>1</sup>H NMR spectrum of (P, Z)-3a.

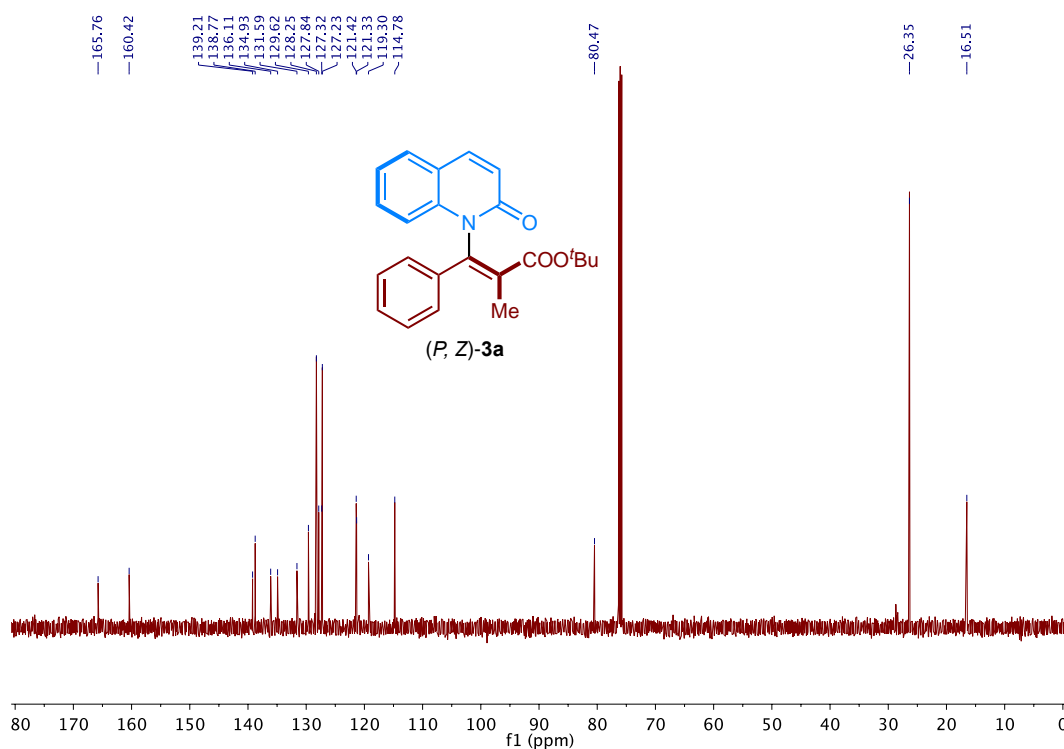

Supplementary Fig. 16. <sup>13</sup>C NMR spectrum of (P, Z)-3a.

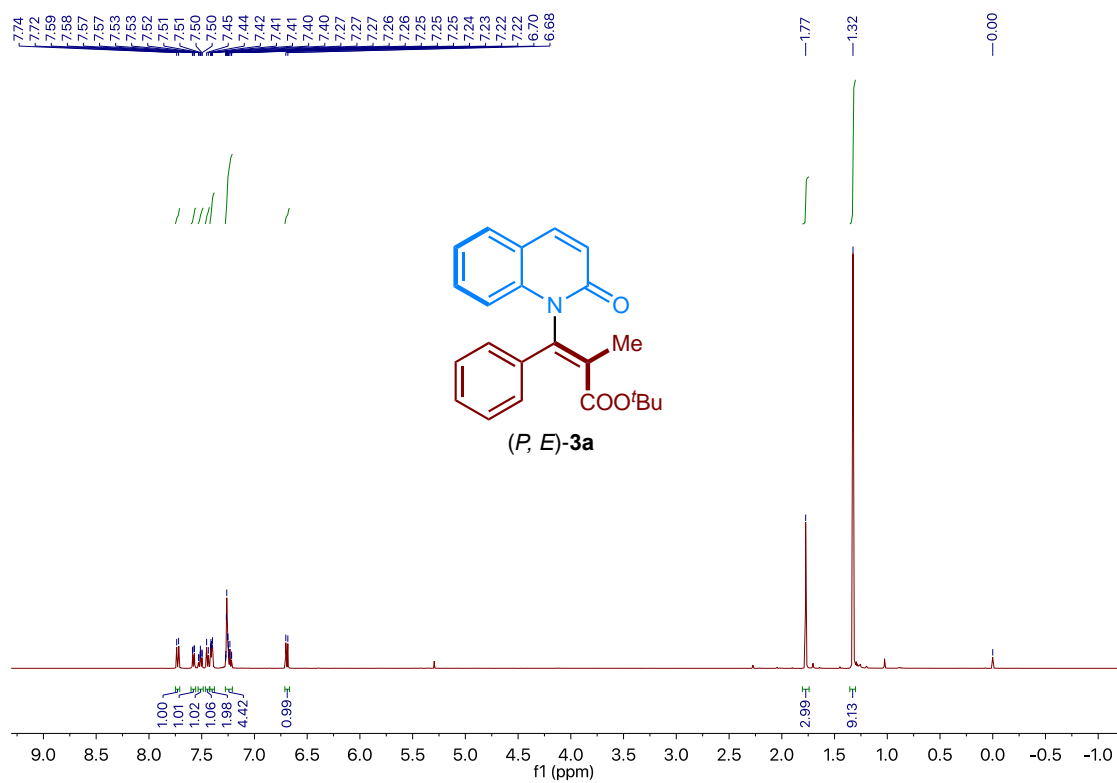

Supplementary Fig. 17. <sup>1</sup>H NMR spectrum of *(P, E)*-3a.

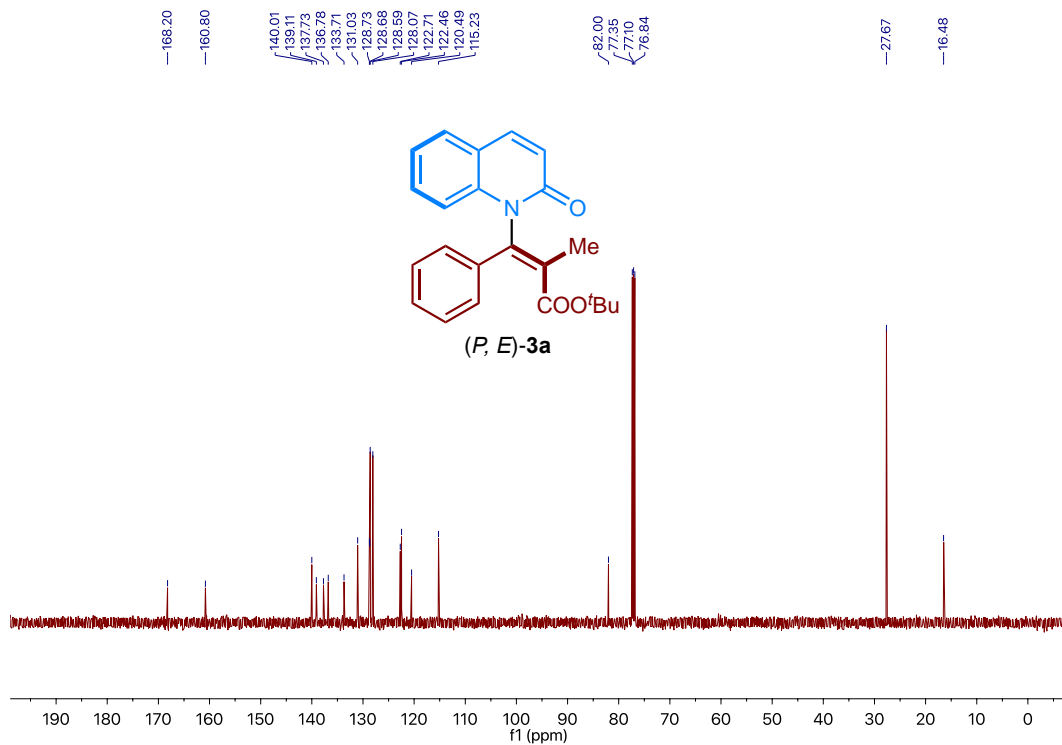

Supplementary Fig. 18. <sup>13</sup>C NMR spectrum of *(P, E)*-3a.

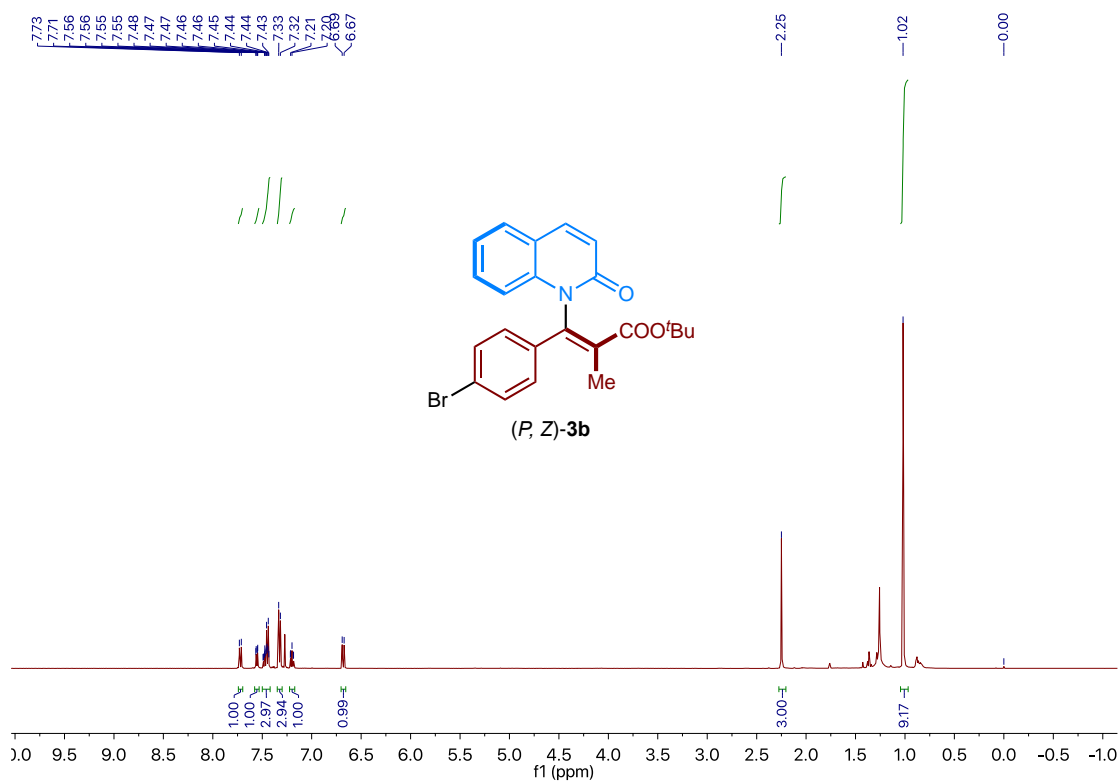

Supplementary Fig. 19. <sup>1</sup>H NMR spectrum of (P, Z)-3b

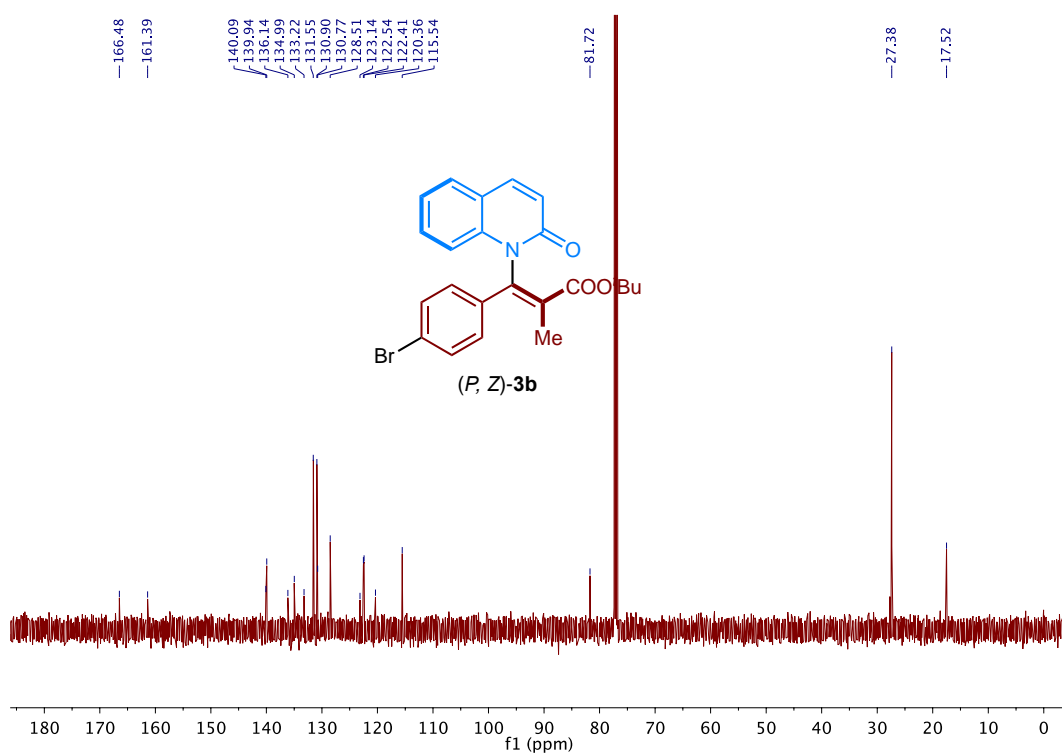

Supplementary Fig. 20. <sup>13</sup>C NMR spectrum of (P, Z)-3b.

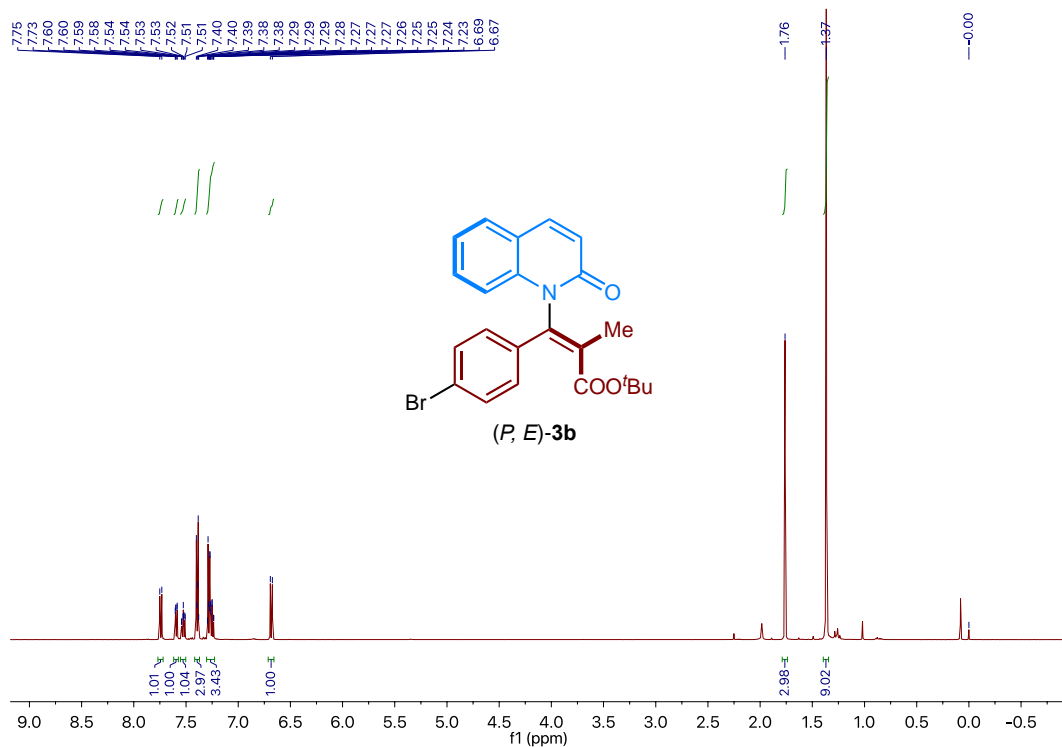

Supplementary Fig. 21. <sup>1</sup>H NMR spectrum of *(P, E)*-3b

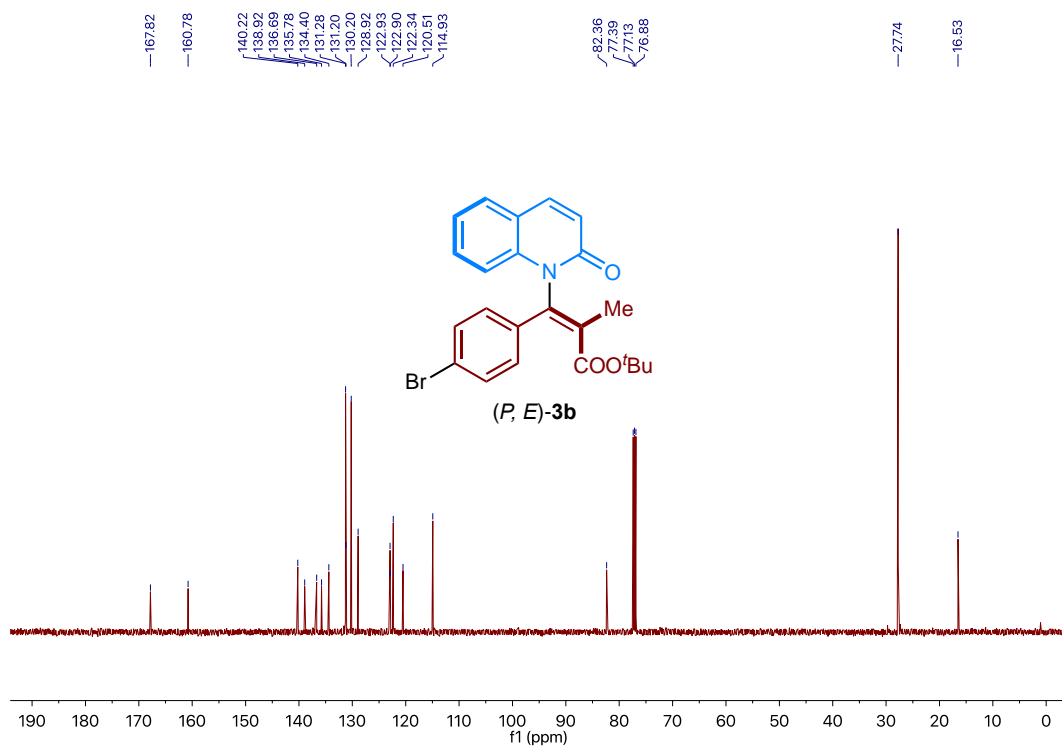

Supplementary Fig. 22. <sup>13</sup>C NMR spectrum of *(P, E)*-3b.

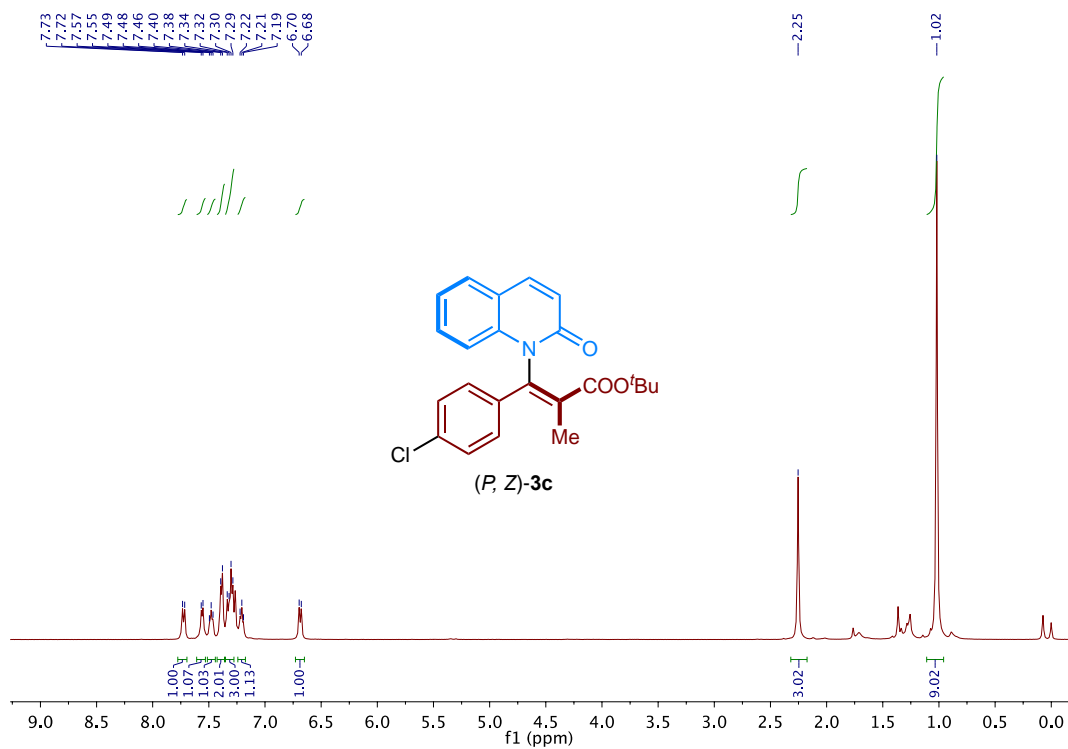

Supplementary Fig. 23. <sup>1</sup>H NMR spectrum of (P, Z)-3c

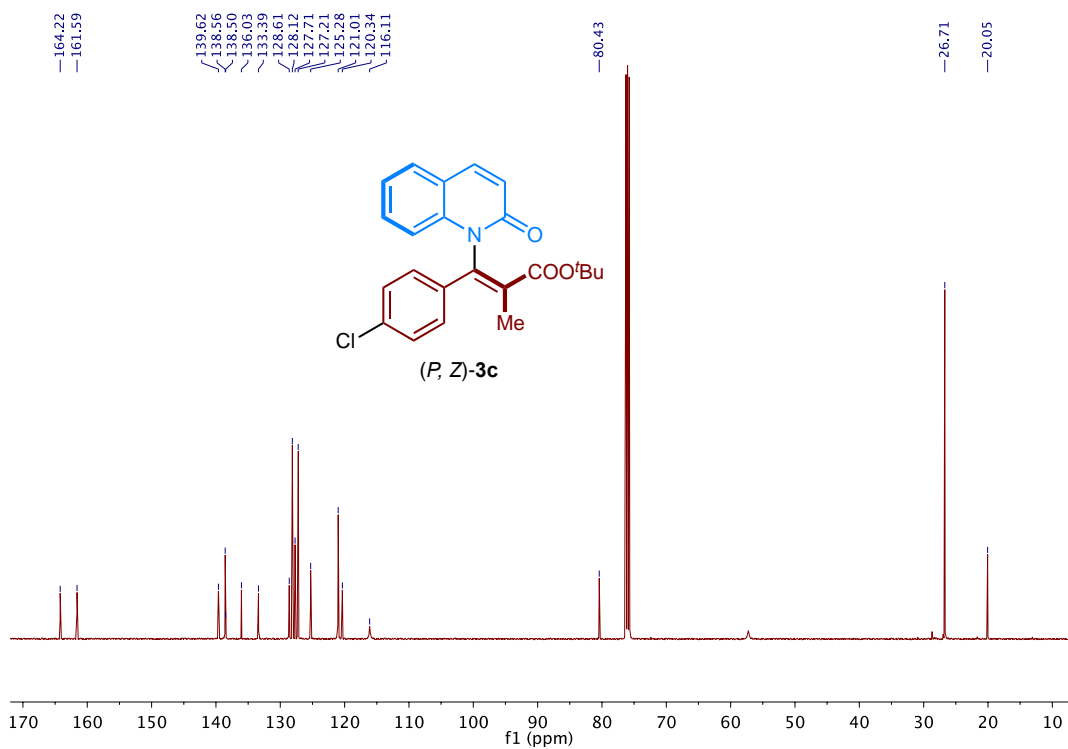

Supplementary Fig. 24. <sup>13</sup>C NMR spectrum of (P, Z)-3c.



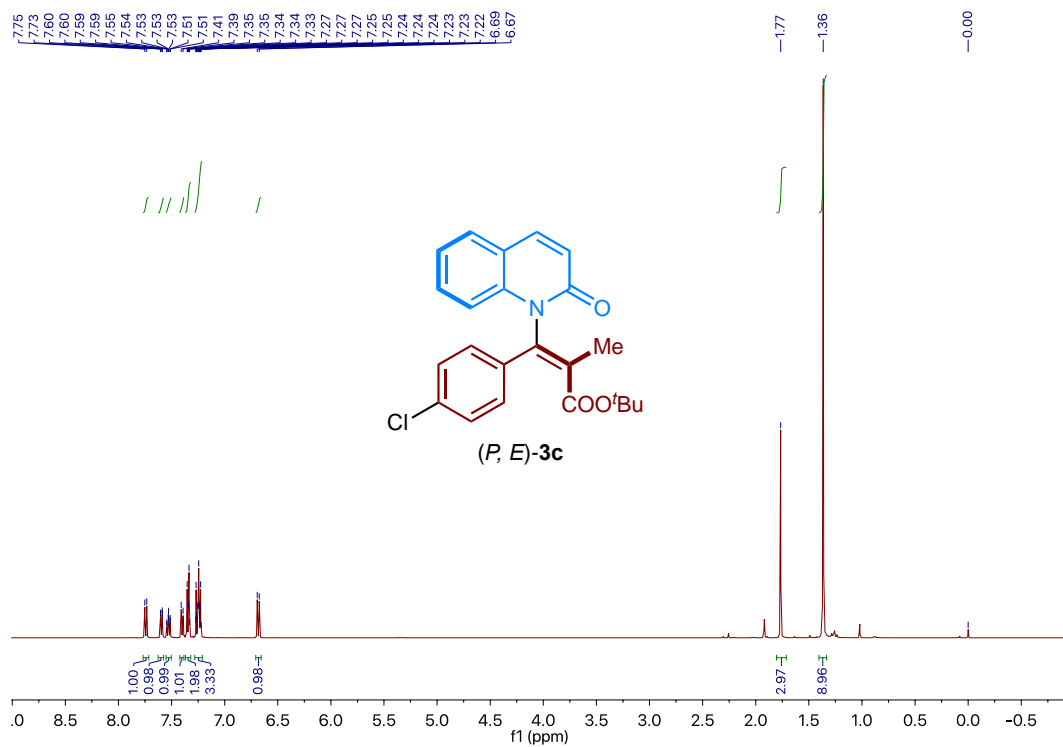

Supplementary Fig. 25.  $^1\text{H}$  NMR spectrum of *(P, E)*-3c

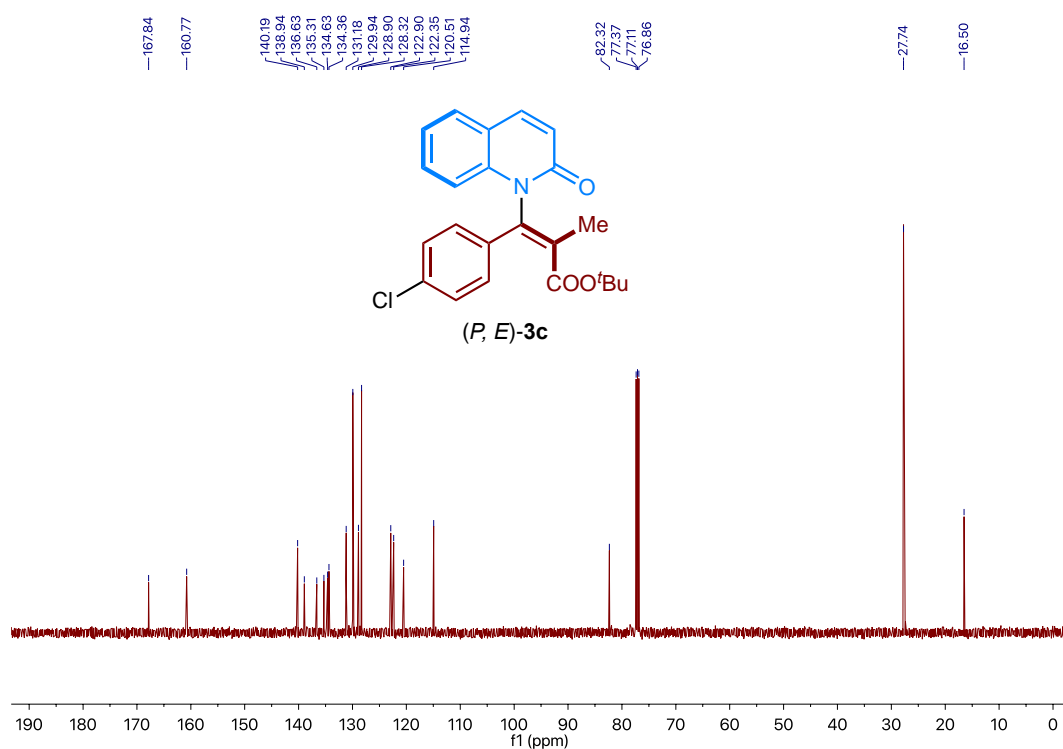

Supplementary Fig. 26.  $^{13}\text{C}$  NMR spectrum of *(P, E)*-3c.

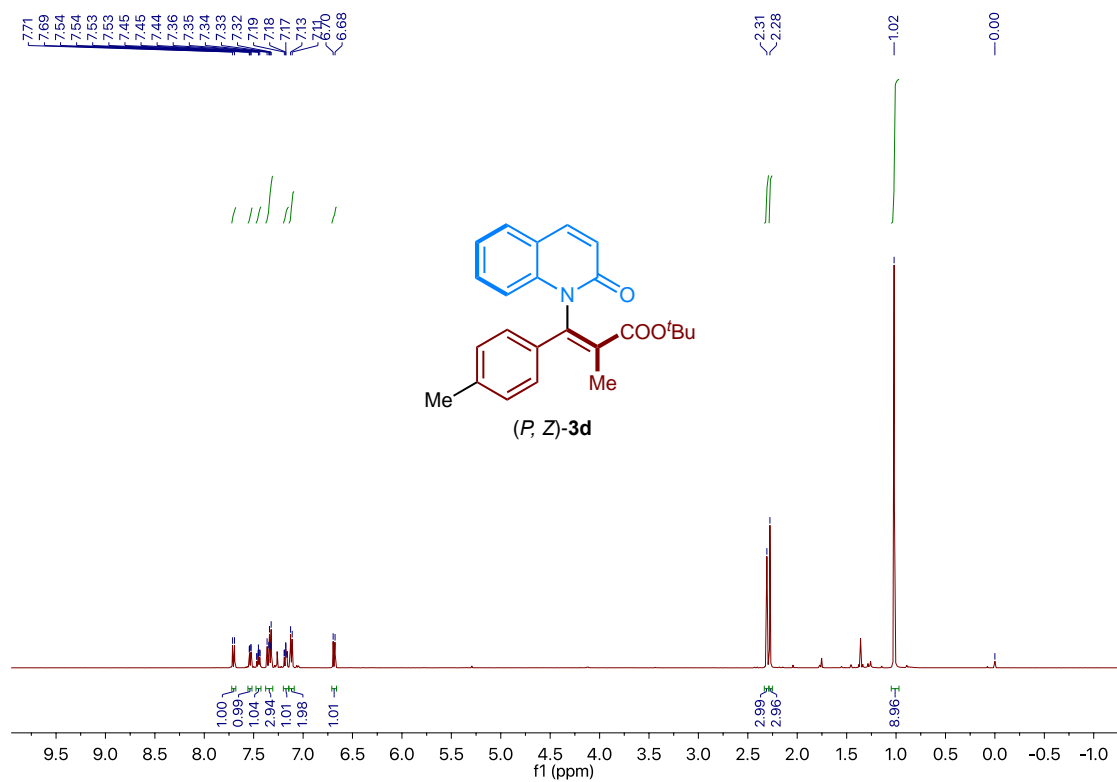

Supplementary Fig. 27. <sup>1</sup>H NMR spectrum of (P, Z)-3d

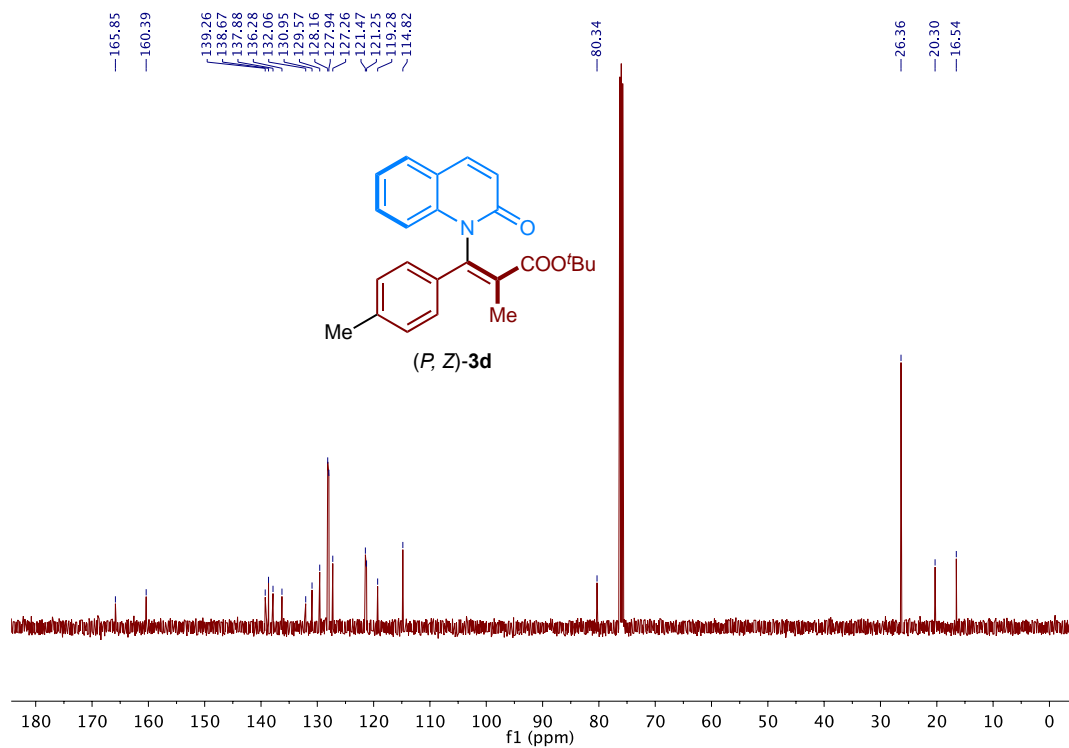

Supplementary Fig. 28. <sup>13</sup>C NMR spectrum of (P, Z)-3d.

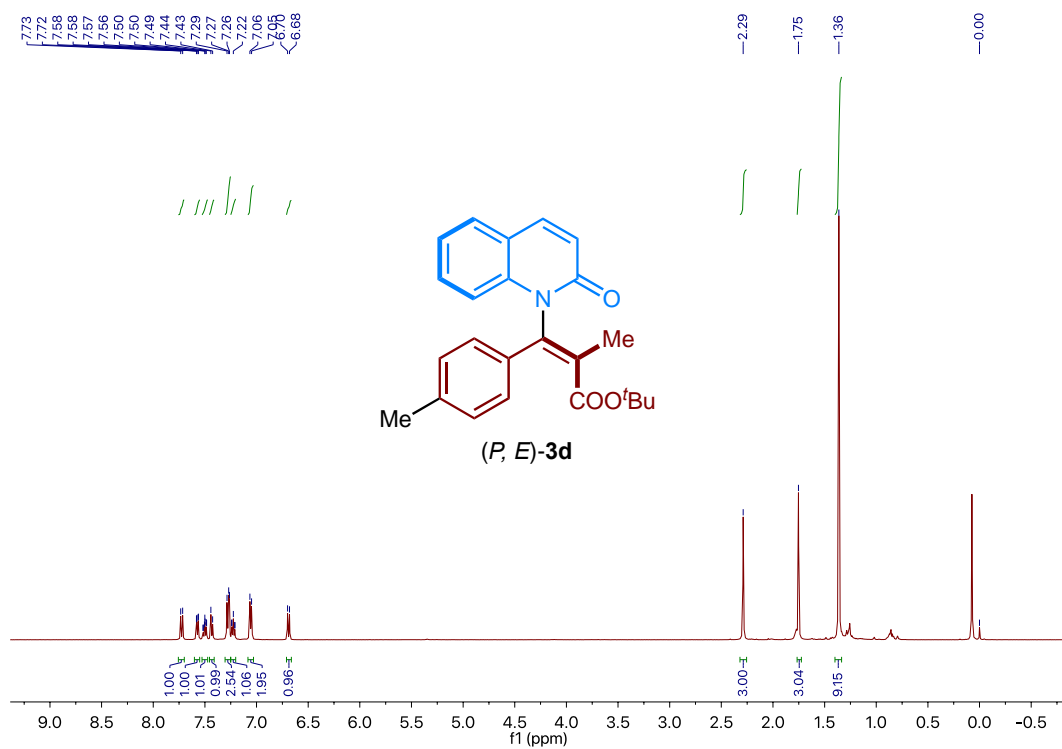

**Supplementary Fig. 29.  $^1\text{H}$  NMR spectrum of (P, E)-3d**

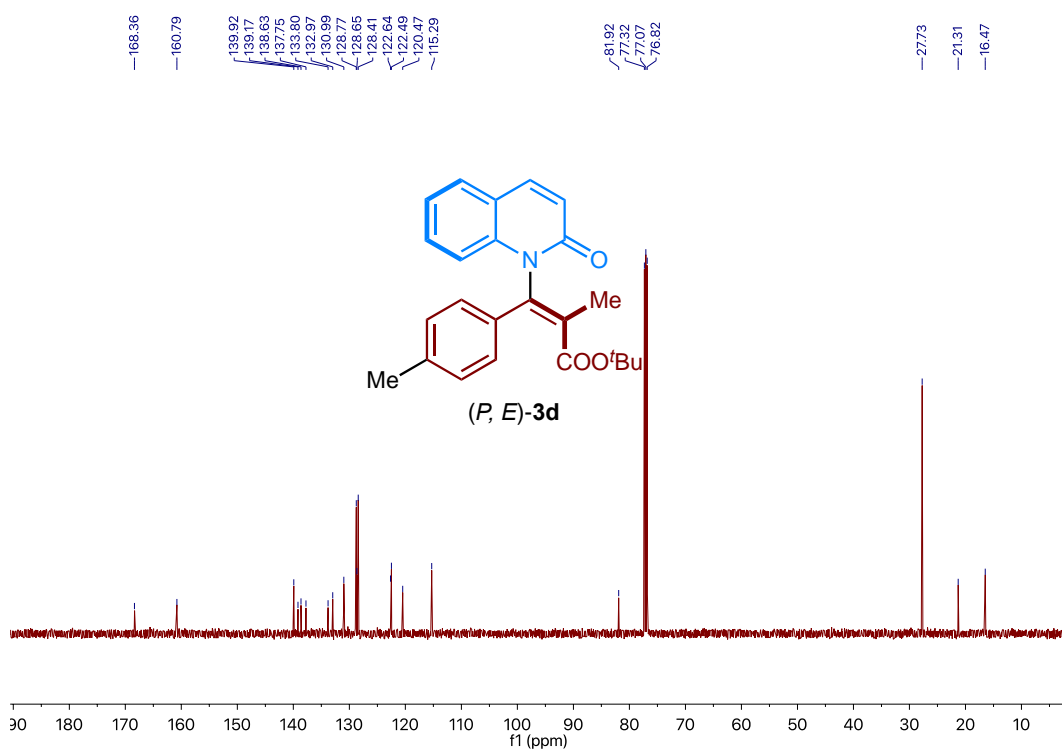

**Supplementary Fig. 30.  $^{13}\text{C}$  NMR spectrum of (P, E)-3d.**

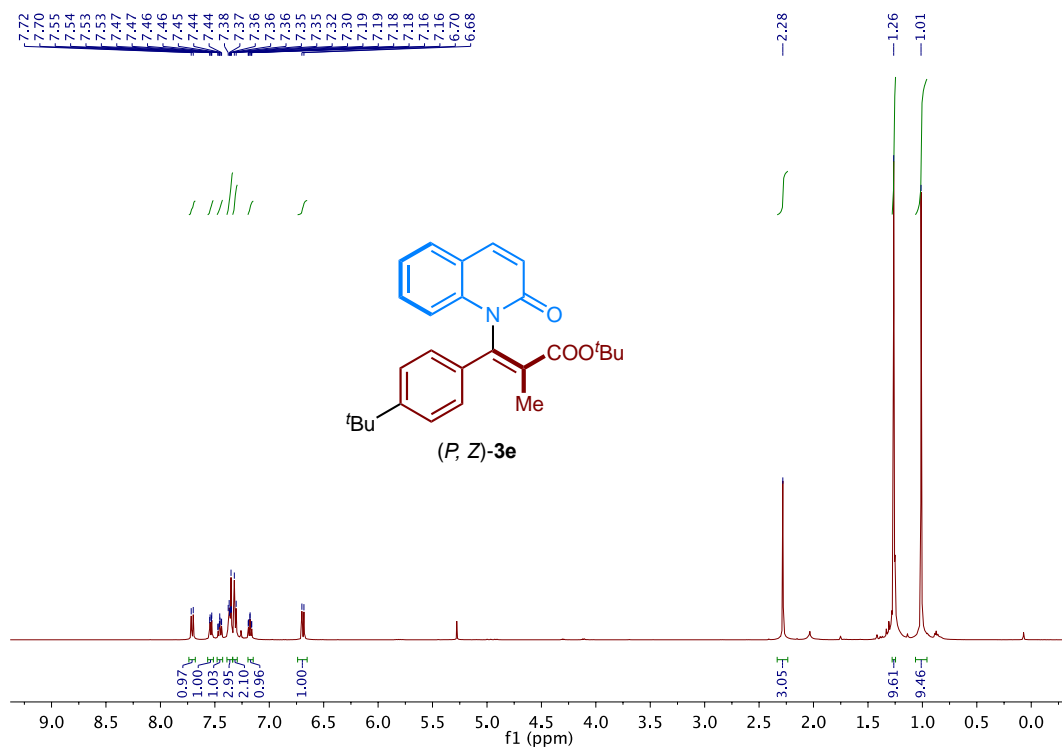

**Supplementary Fig. 31. <sup>1</sup>H NMR spectrum of (P, Z)-3e**

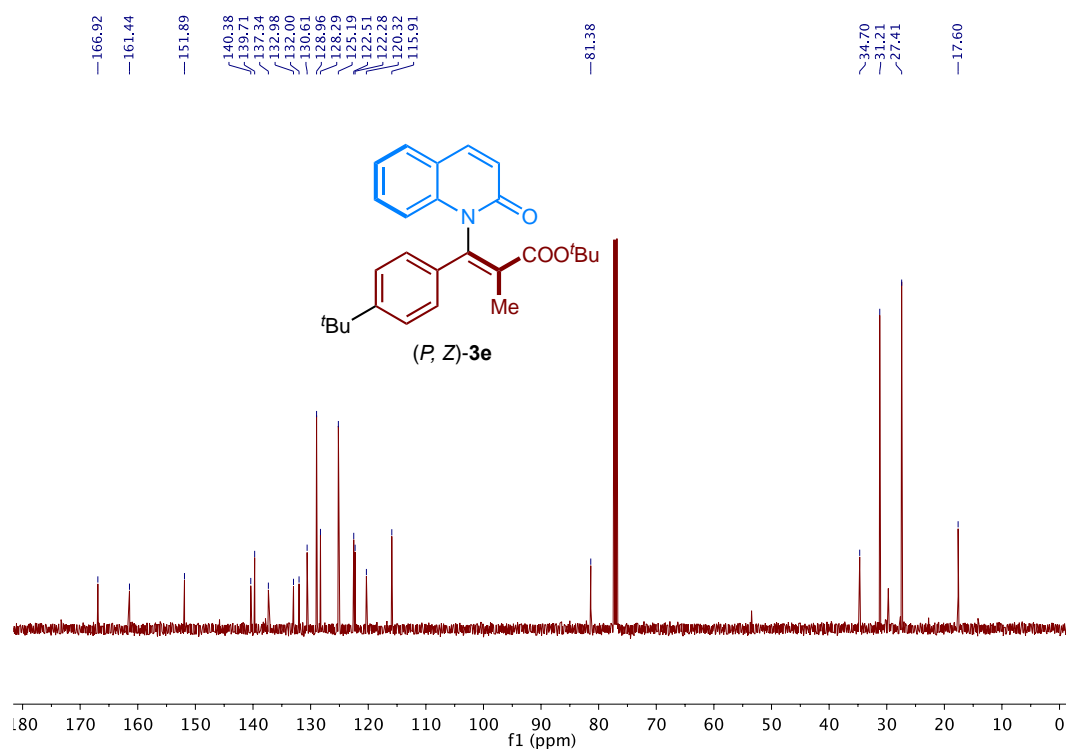

**Supplementary Fig. 32. <sup>13</sup>C NMR spectrum of (P, Z)-3e.**

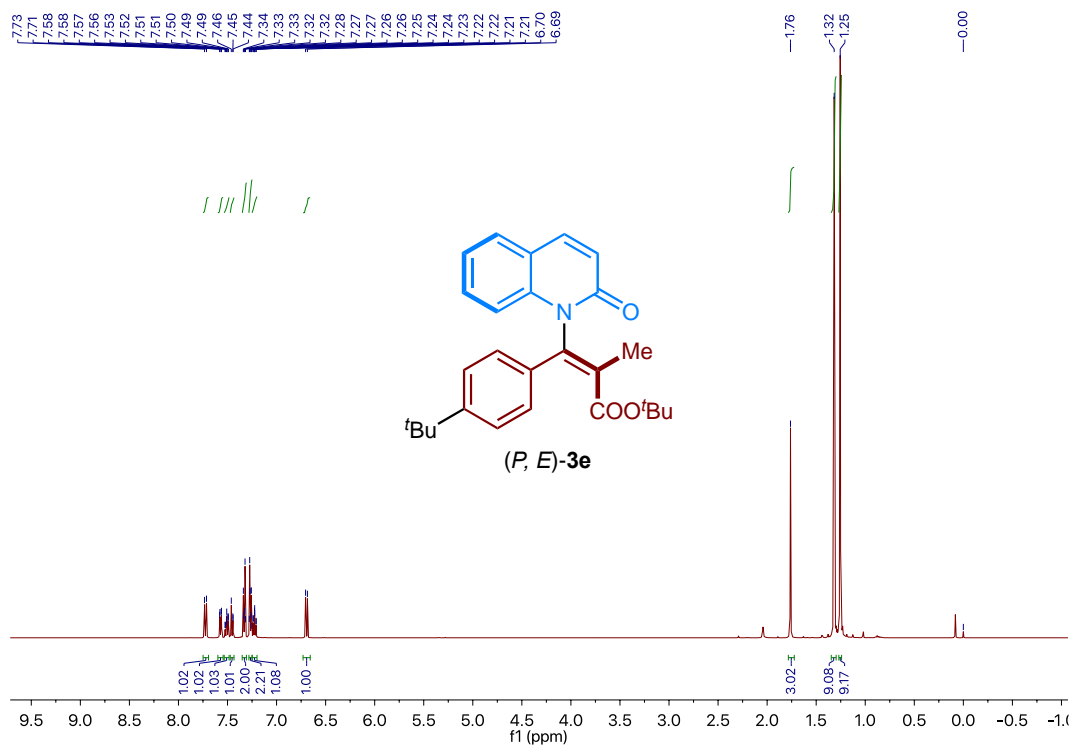

Supplementary Fig. 33. <sup>1</sup>H NMR spectrum of *(P, E)*-3e

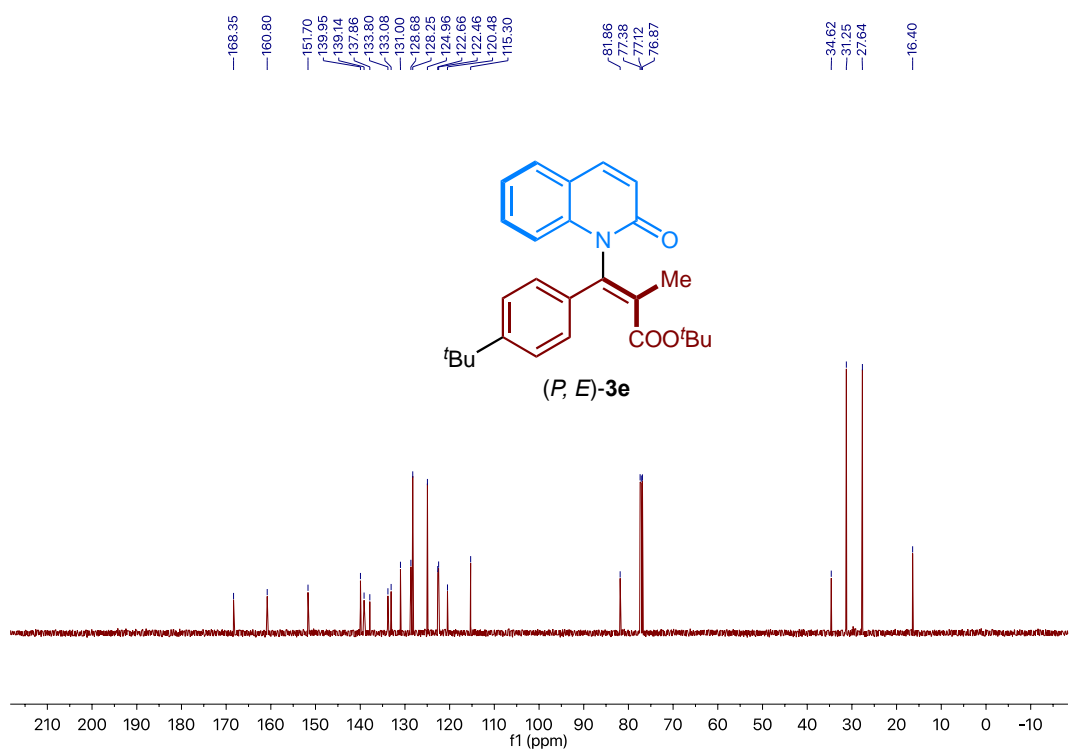

Supplementary Fig. 34. <sup>13</sup>C NMR spectrum of *(P, E)*-3e.

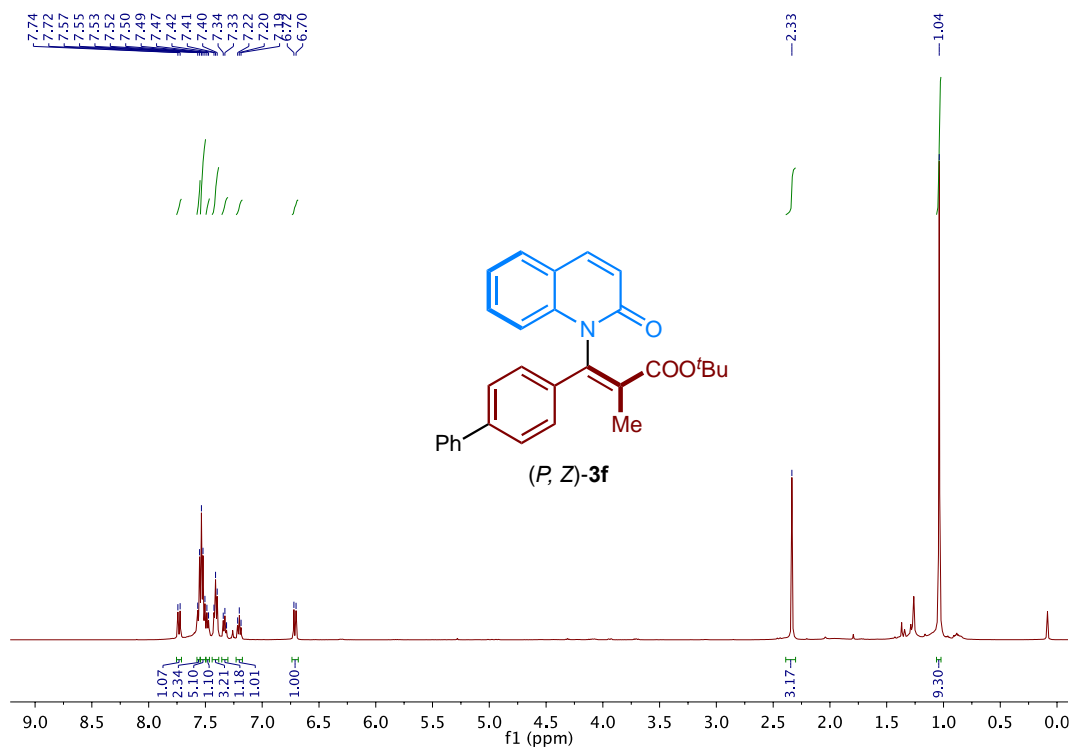

Supplementary Fig. 35. <sup>1</sup>H NMR spectrum of *(P, Z)*-3f

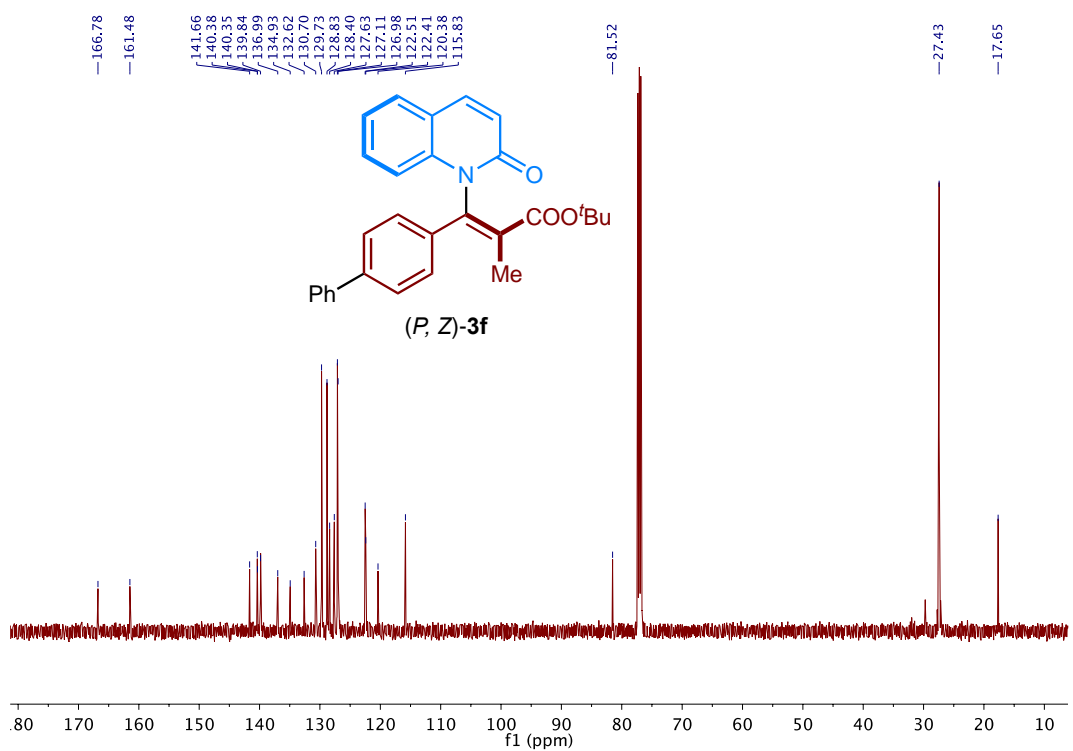

Supplementary Fig. 36. <sup>13</sup>C NMR spectrum of *(P, Z)*-3f.

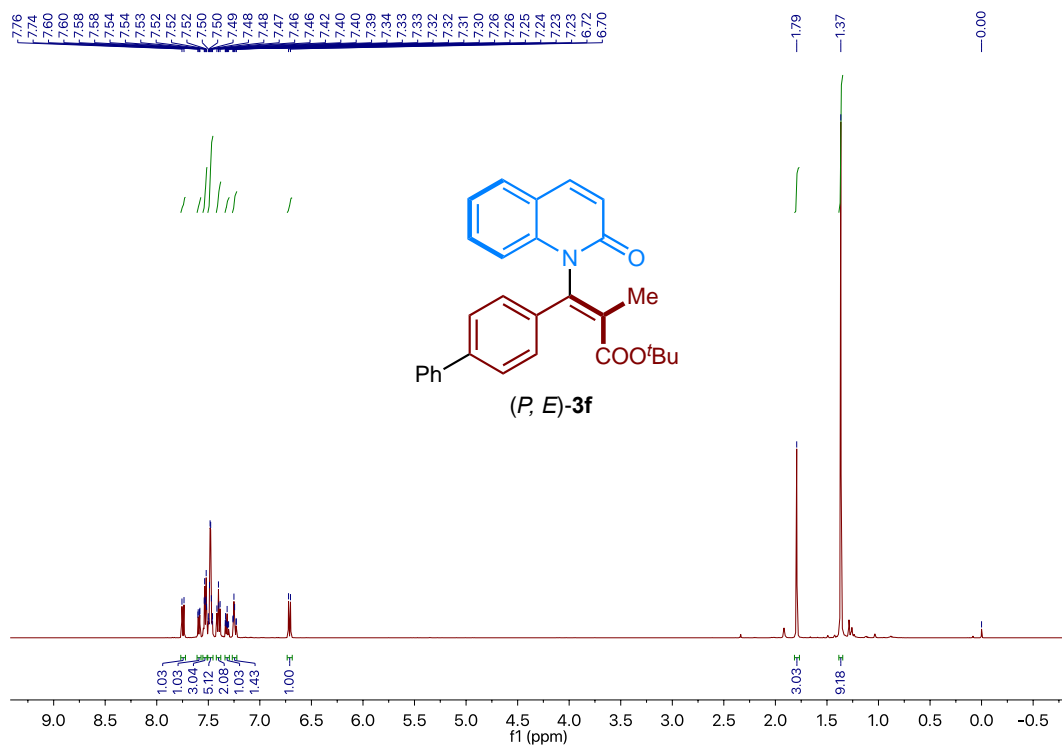

Supplementary Fig. 37. <sup>1</sup>H NMR spectrum of *(P, E)*-3f

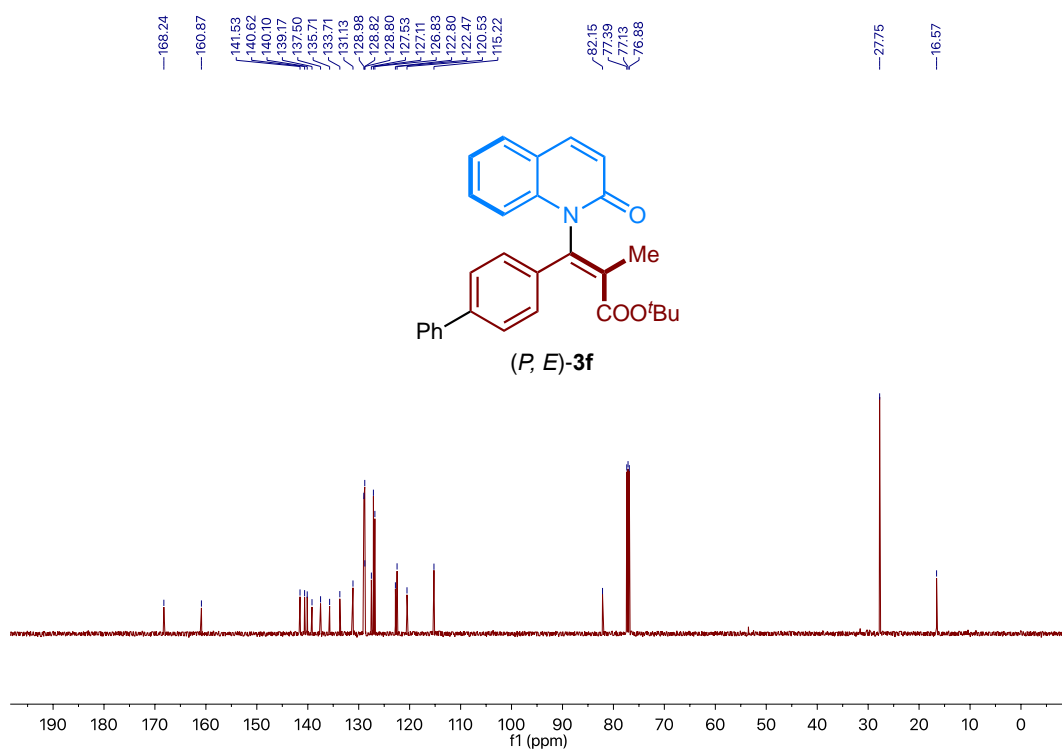

Supplementary Fig. 38. <sup>13</sup>C NMR spectrum of *(P, E)*-3f.

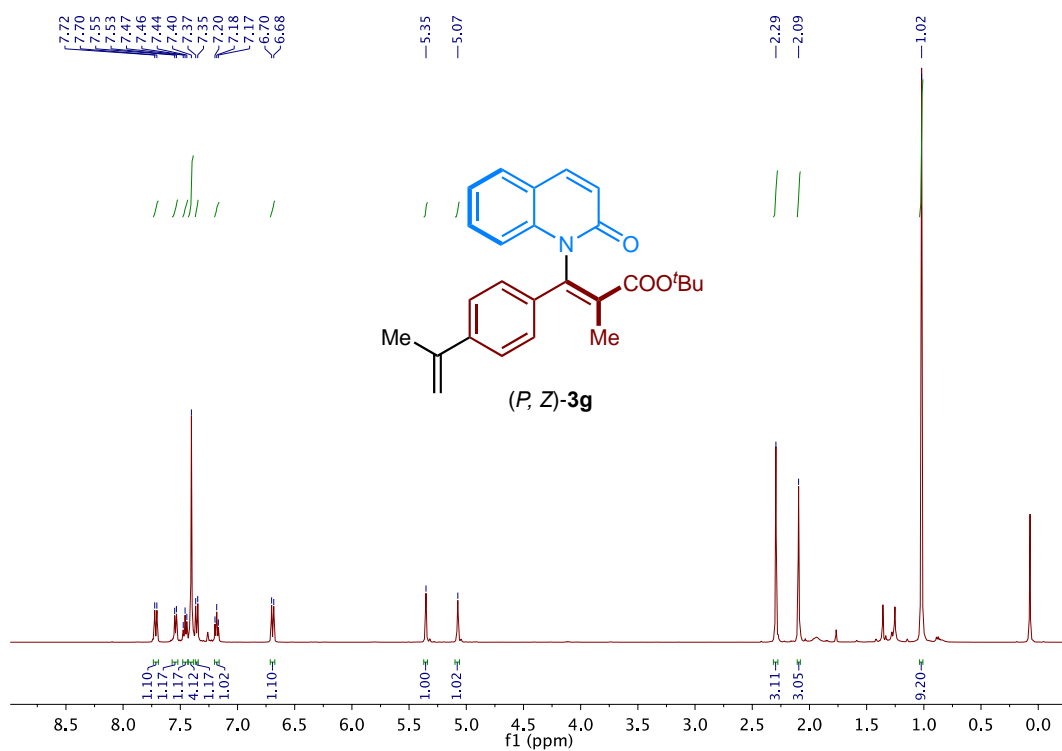

Supplementary Fig. 39. <sup>1</sup>H NMR spectrum of *(P, Z)*-3g

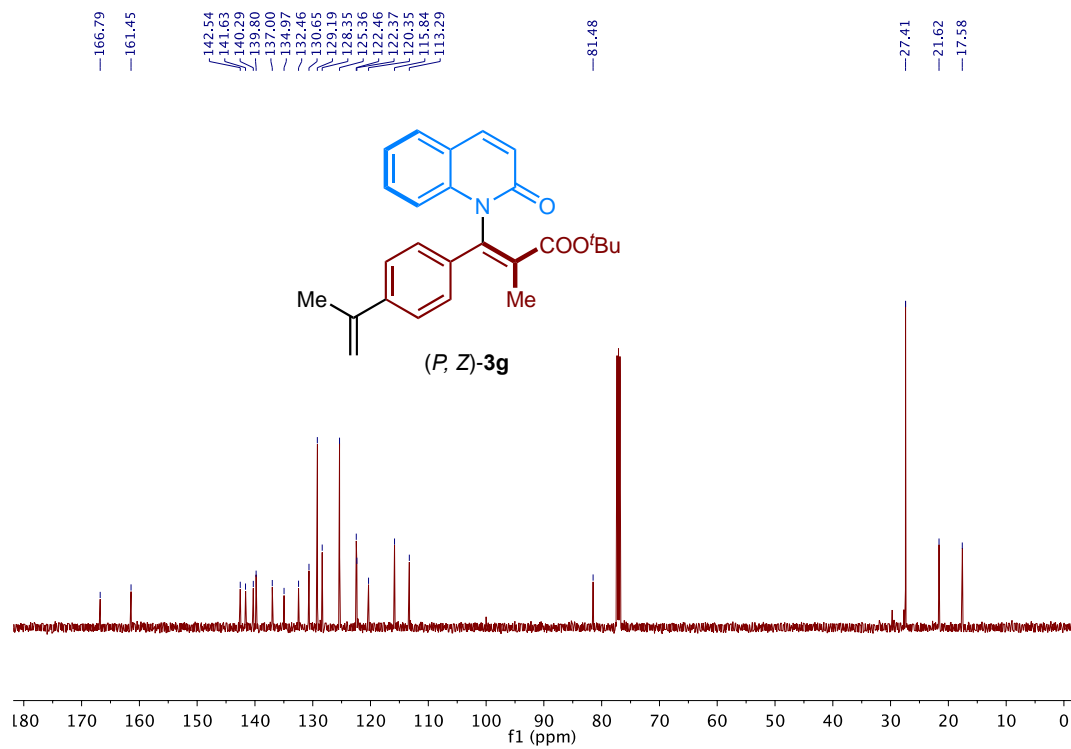

Supplementary Fig. 40. <sup>13</sup>C NMR spectrum of *(P, Z)*-3g.



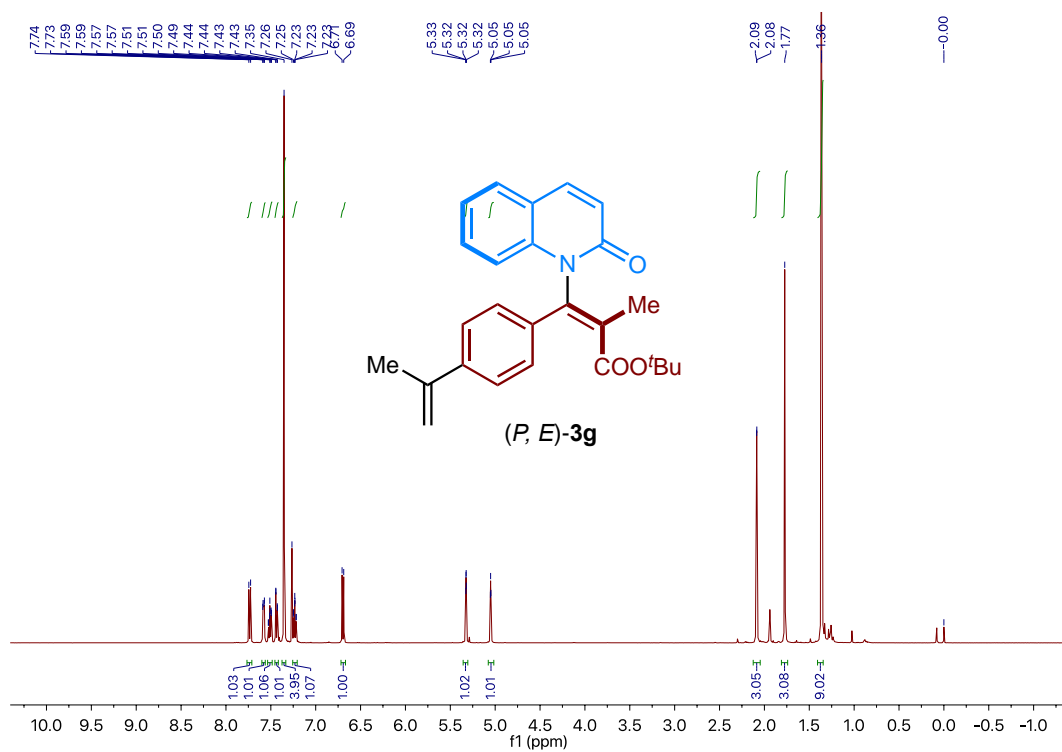

Supplementary Fig. 41.  $^1\text{H}$  NMR spectrum of (P, E)-3g

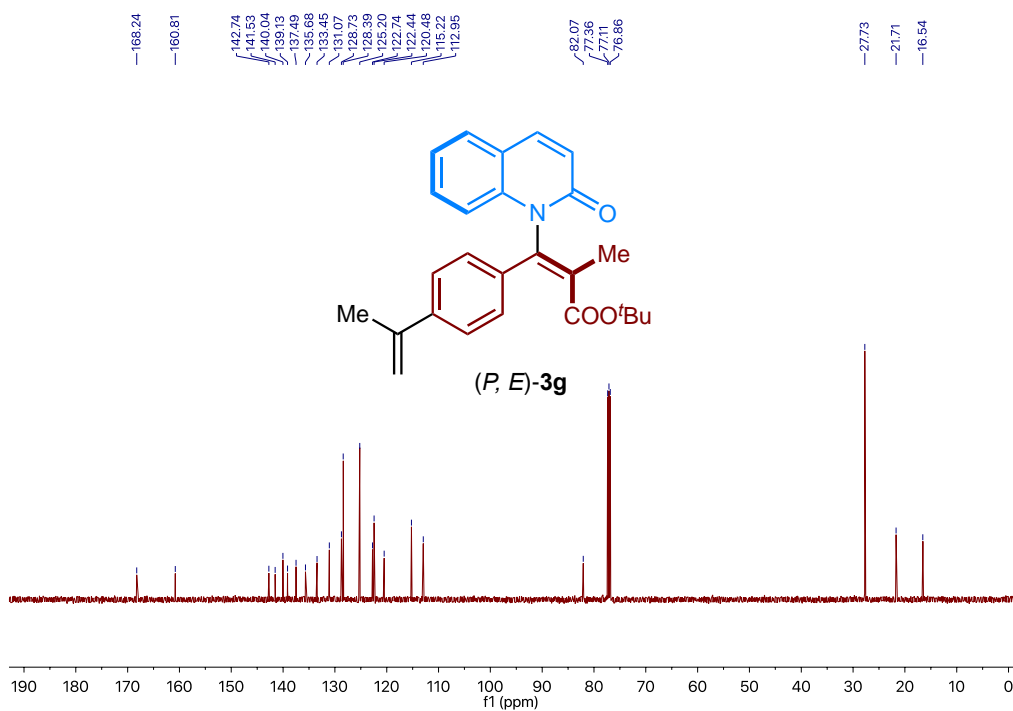

Supplementary Fig. 42.  $^{13}\text{C}$  NMR spectrum of (P, E)-3g.

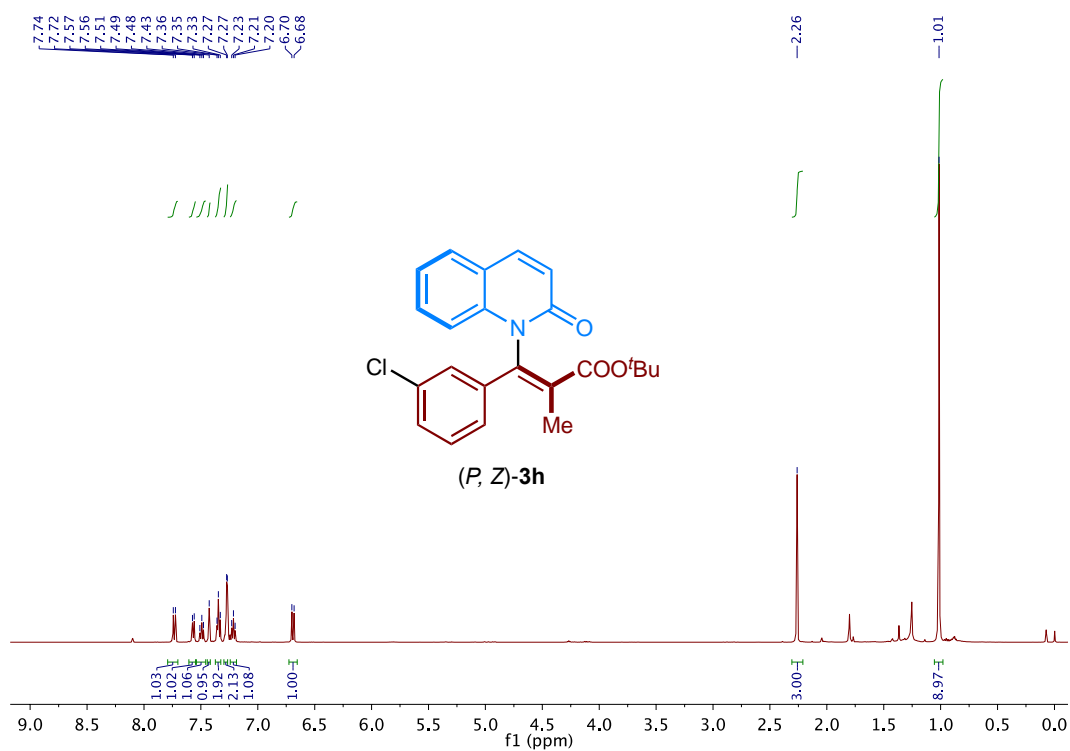

Supplementary Fig. 43. <sup>1</sup>H NMR spectrum of (P, Z)-3h

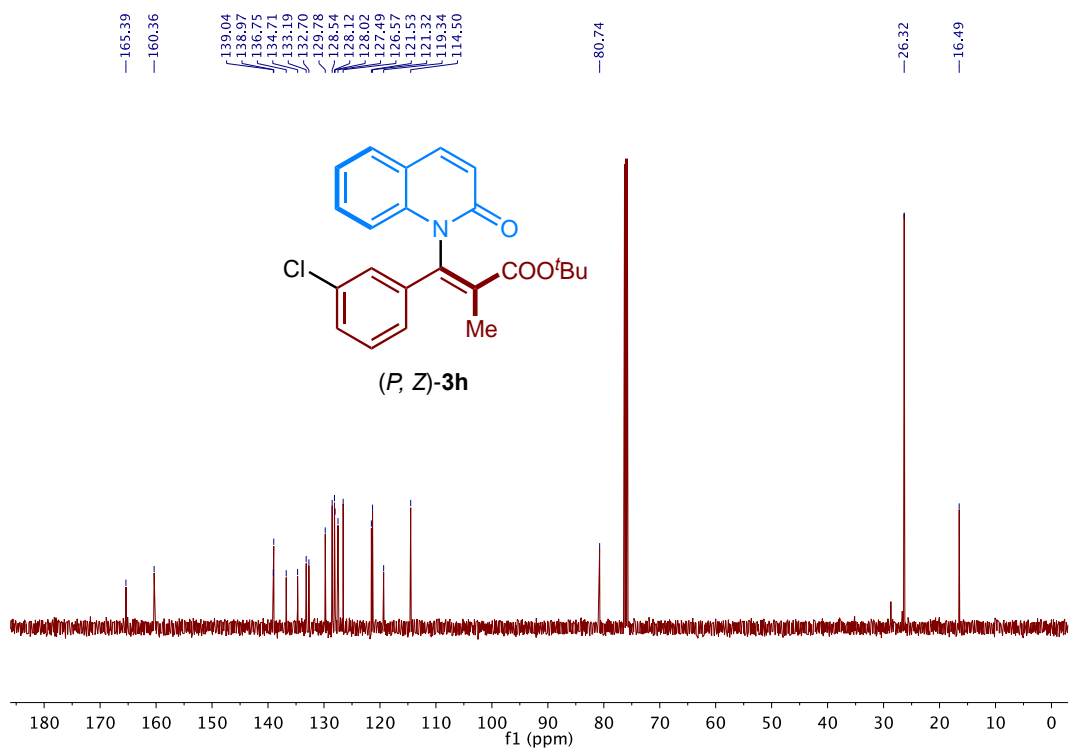

Supplementary Fig. 44. <sup>13</sup>C NMR spectrum of (P, Z)-3h.

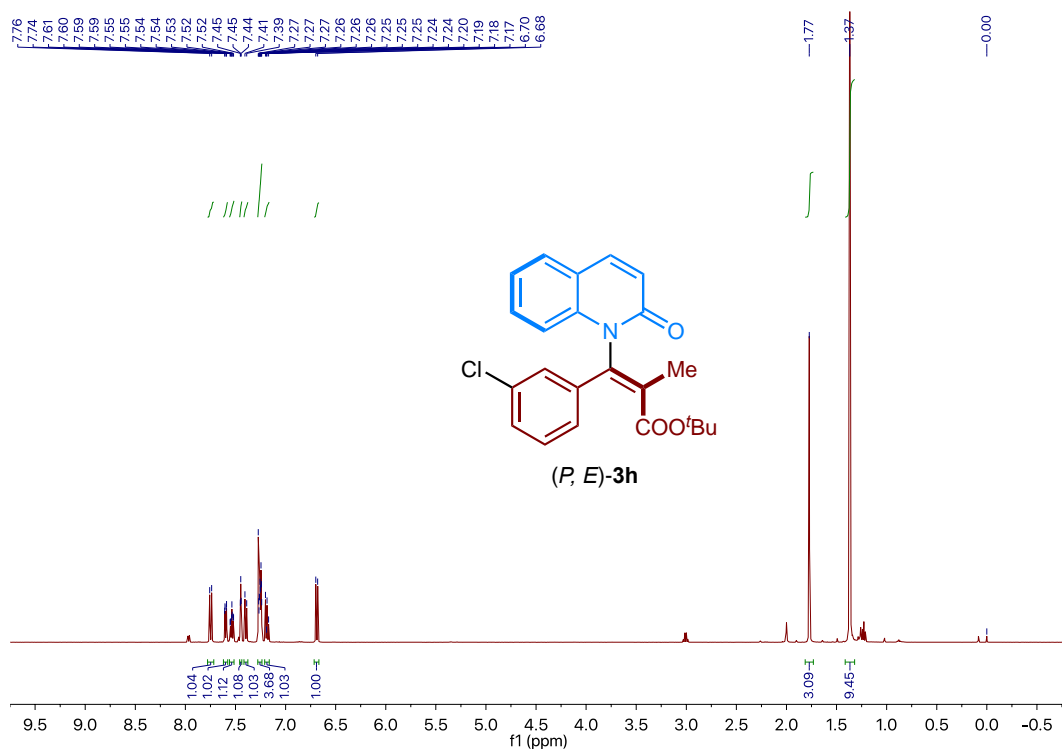

Supplementary Fig. 45. <sup>1</sup>H NMR spectrum of **(P, E)-3h**

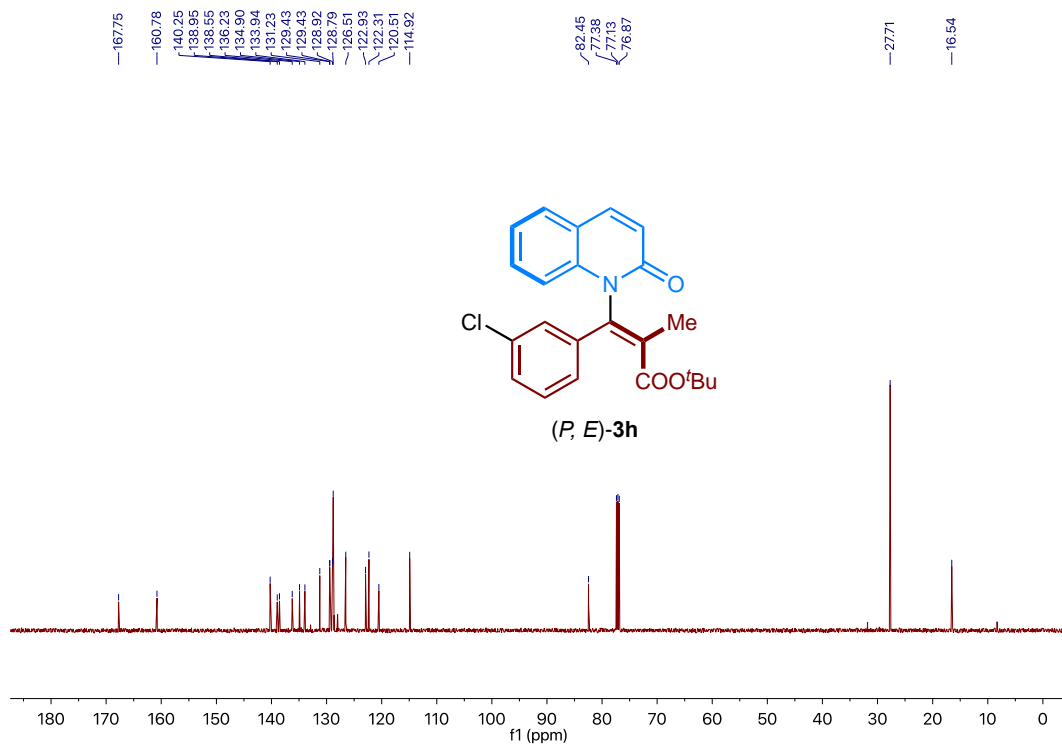

Supplementary Fig. 46. <sup>13</sup>C NMR spectrum of **(P, E)-3h**.

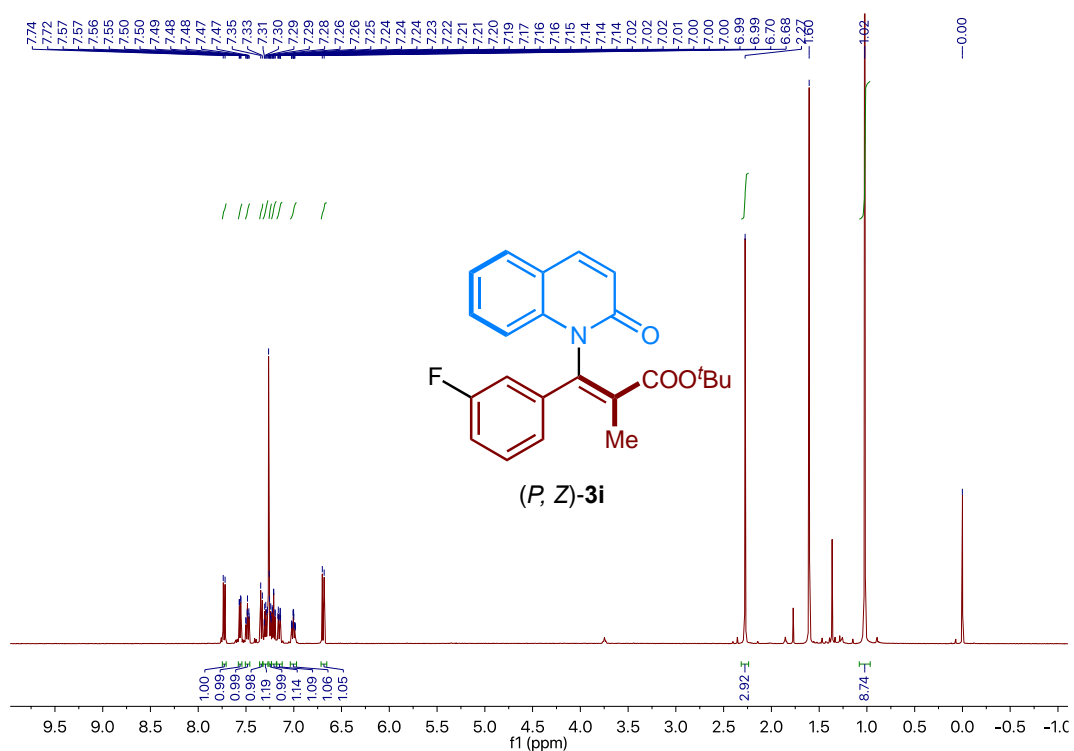

Supplementary Fig. 47. <sup>1</sup>H NMR spectrum of (P, Z)-3i

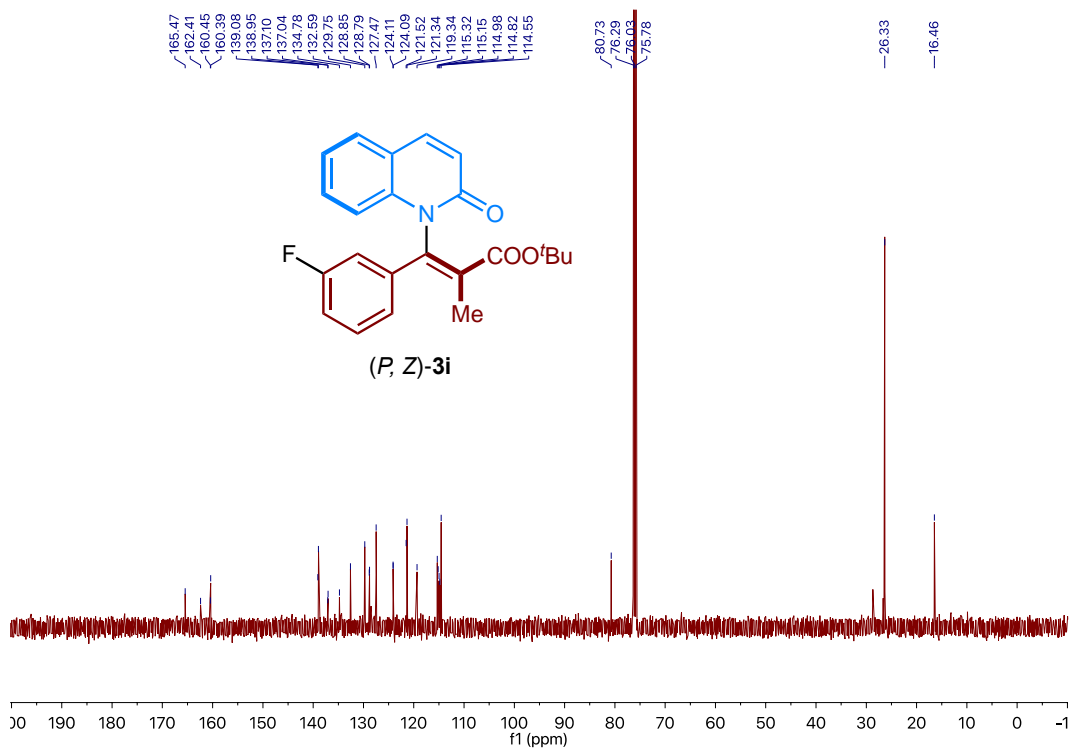

Supplementary Fig. 48. <sup>13</sup>C NMR spectrum of (P, Z)-3i.

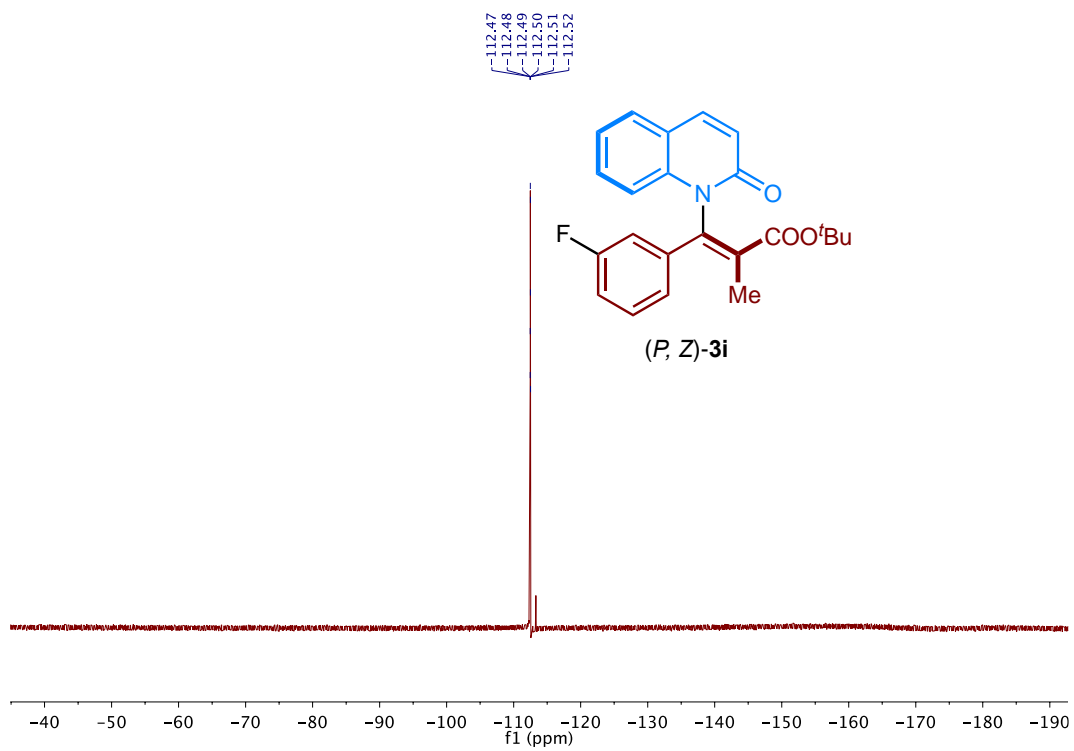

**Supplementary Fig. 49.**  $^{19}\text{F}$  NMR spectrum of  $(P, Z)\text{-3i}$ .

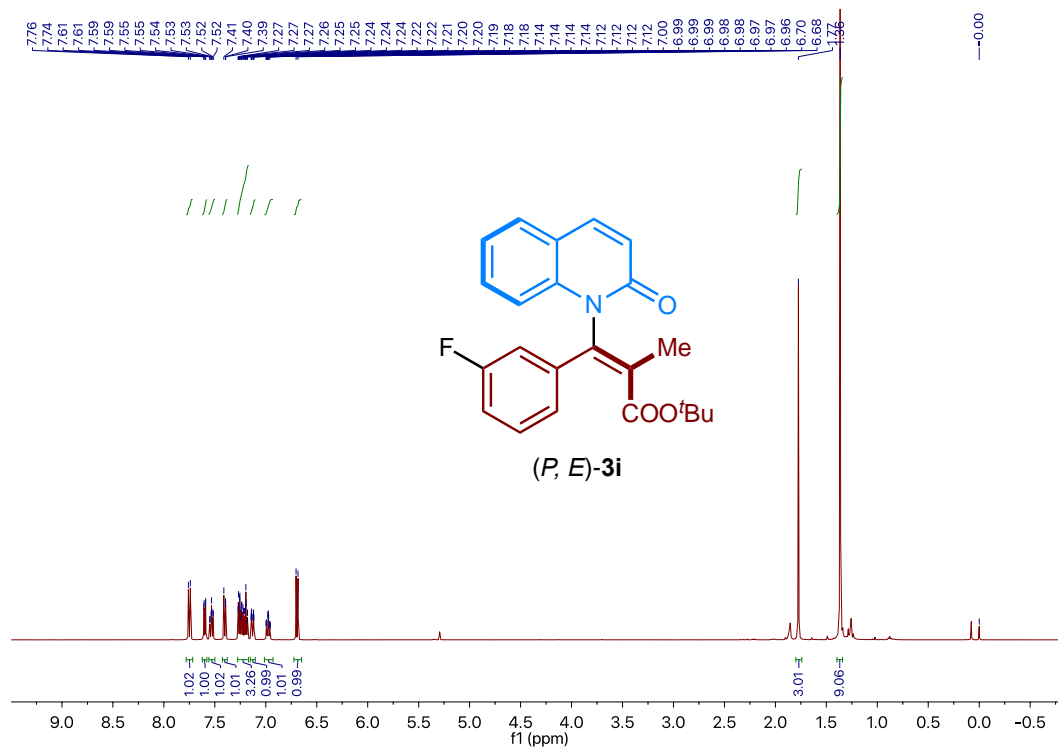

**Supplementary Fig. 50.  $^1\text{H}$  NMR spectrum of (P, E)-3i**

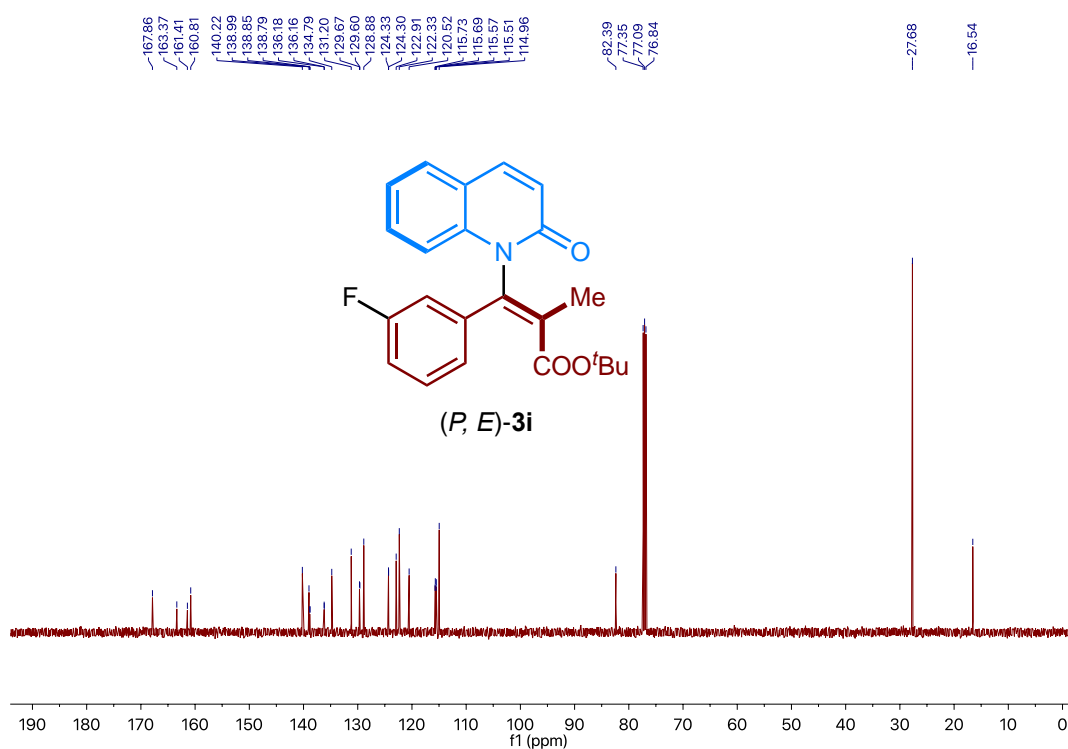

**Supplementary Fig. 51.  $^{13}\text{C}$  NMR spectrum of (P, E)-3i.**

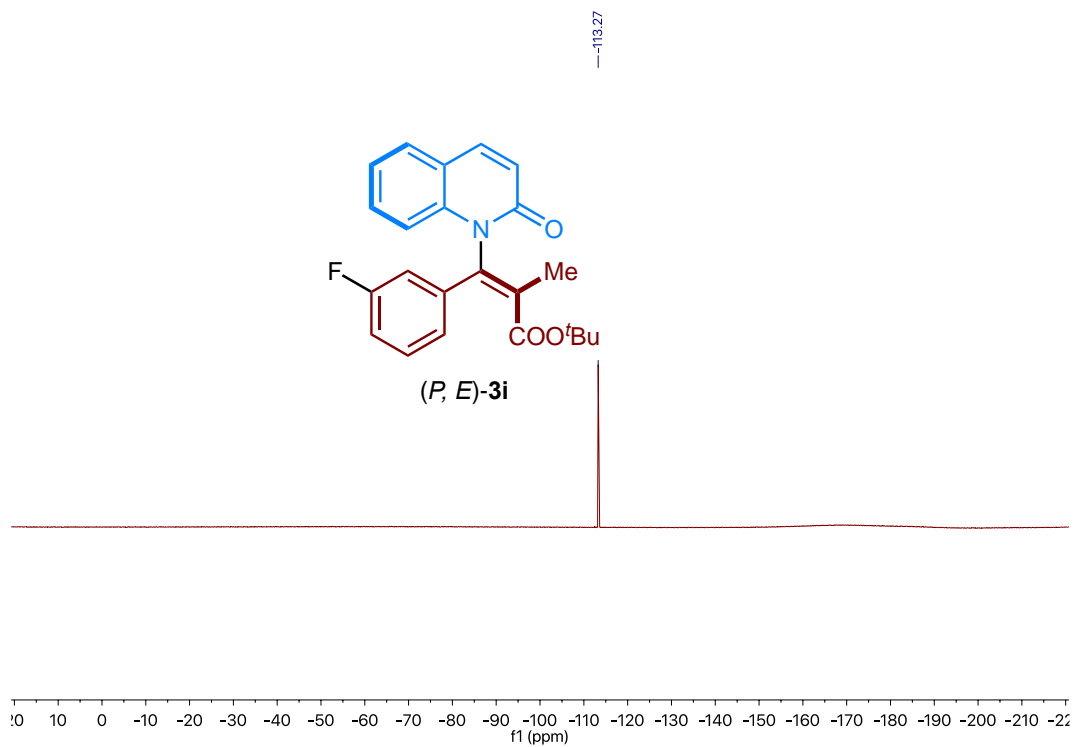

**Supplementary Fig. 52.**  $^{19}\text{F}$  NMR spectrum of  $(P, E)$ -3i.

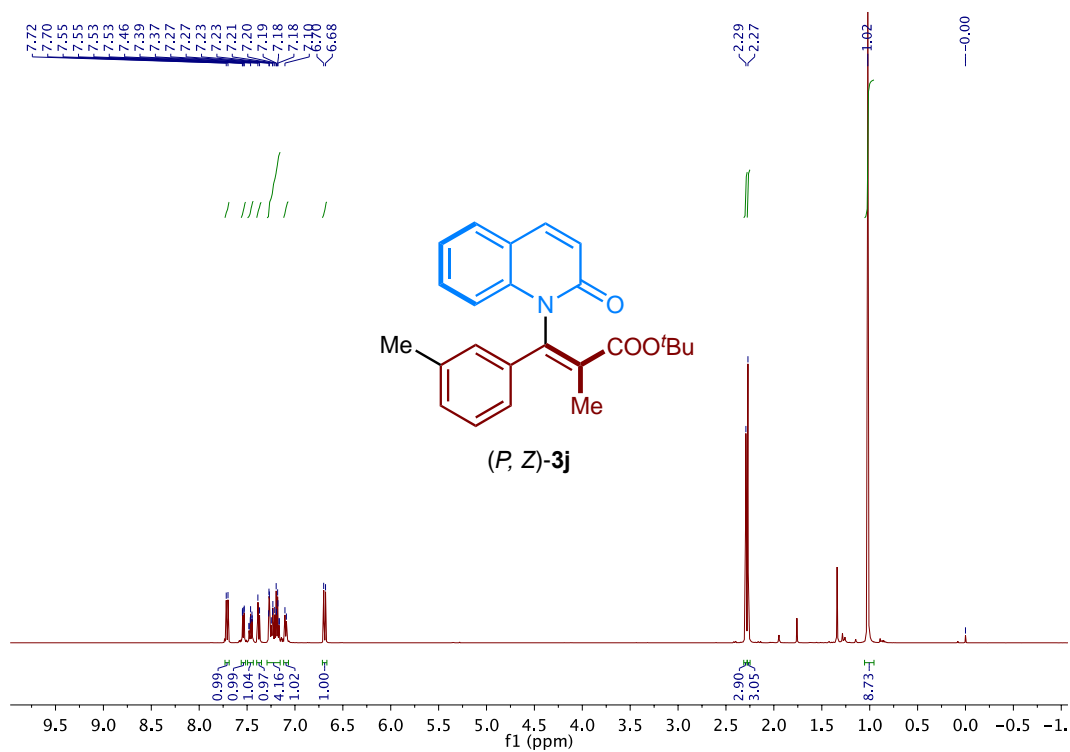

**Supplementary Fig. 53. <sup>1</sup>H NMR spectrum of (P, Z)-3j**

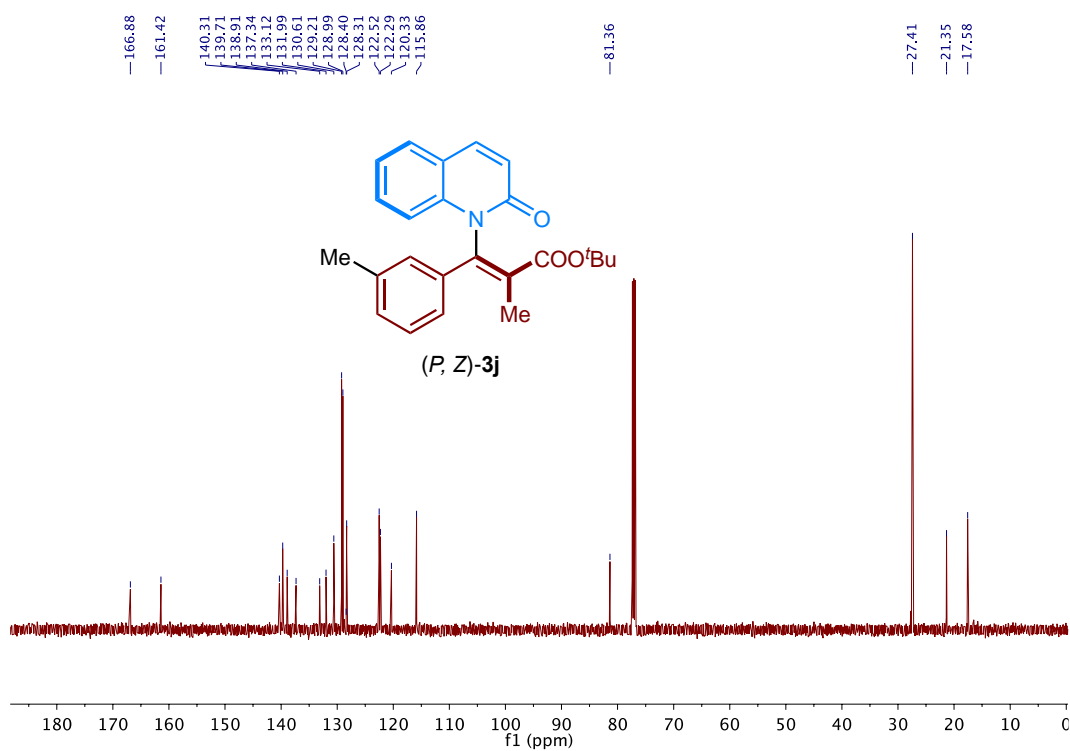

**Supplementary Fig. 54. <sup>13</sup>C NMR spectrum of (P, Z)-3j.**



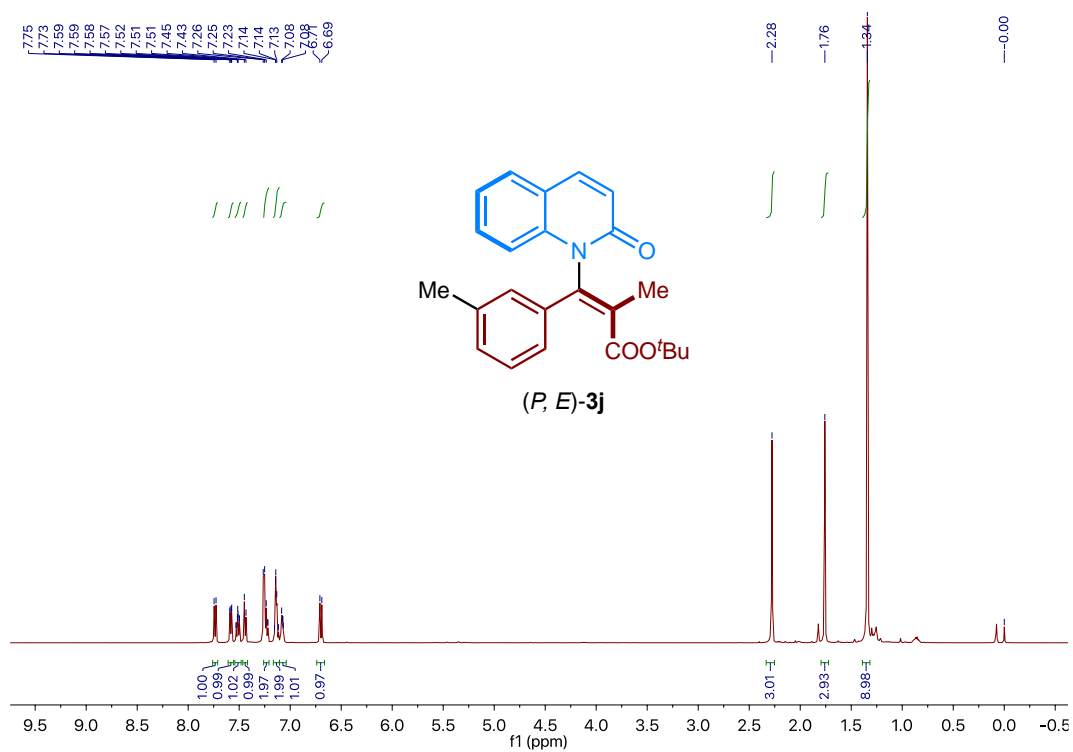

Supplementary Fig. 55.  $^1\text{H}$  NMR spectrum of *(P, E)*-3j

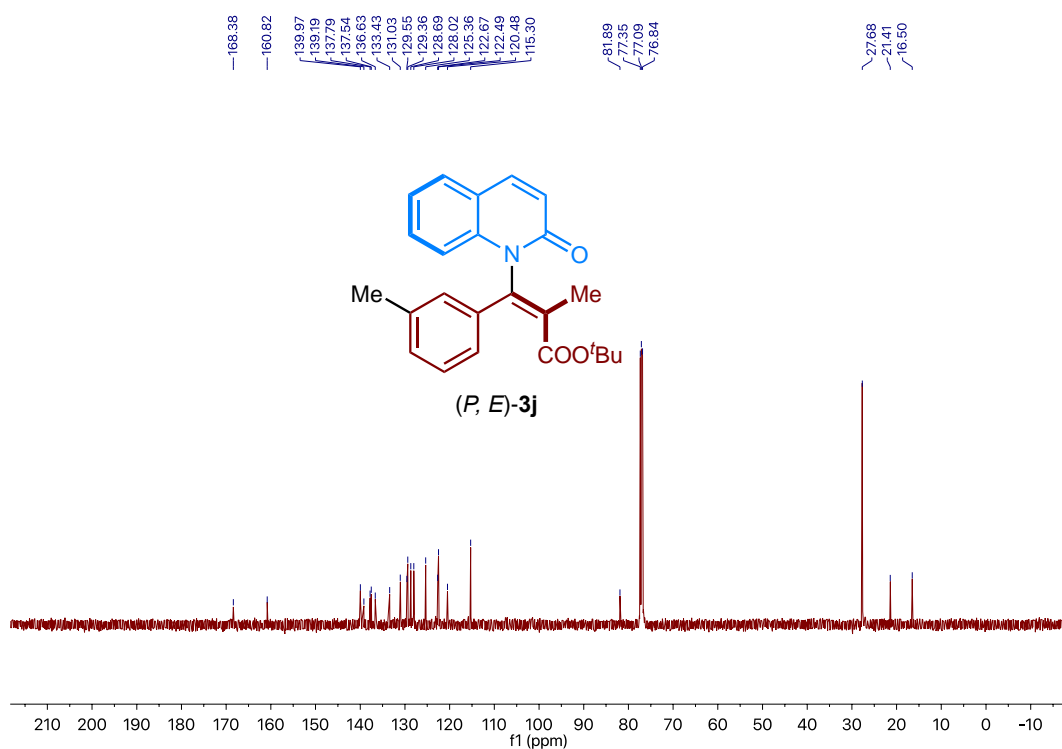

Supplementary Fig. 56.  $^{13}\text{C}$  NMR spectrum of *(P, E)*-3j.

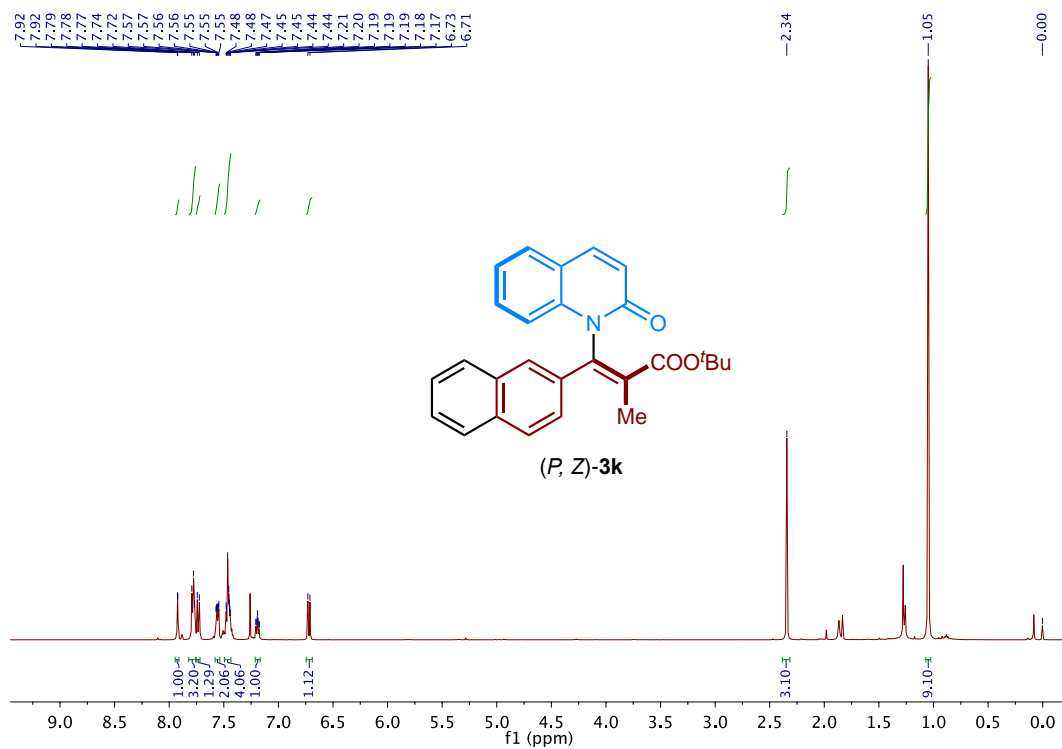

Supplementary Fig. 57. <sup>1</sup>H NMR spectrum of *(P, Z)*-3k

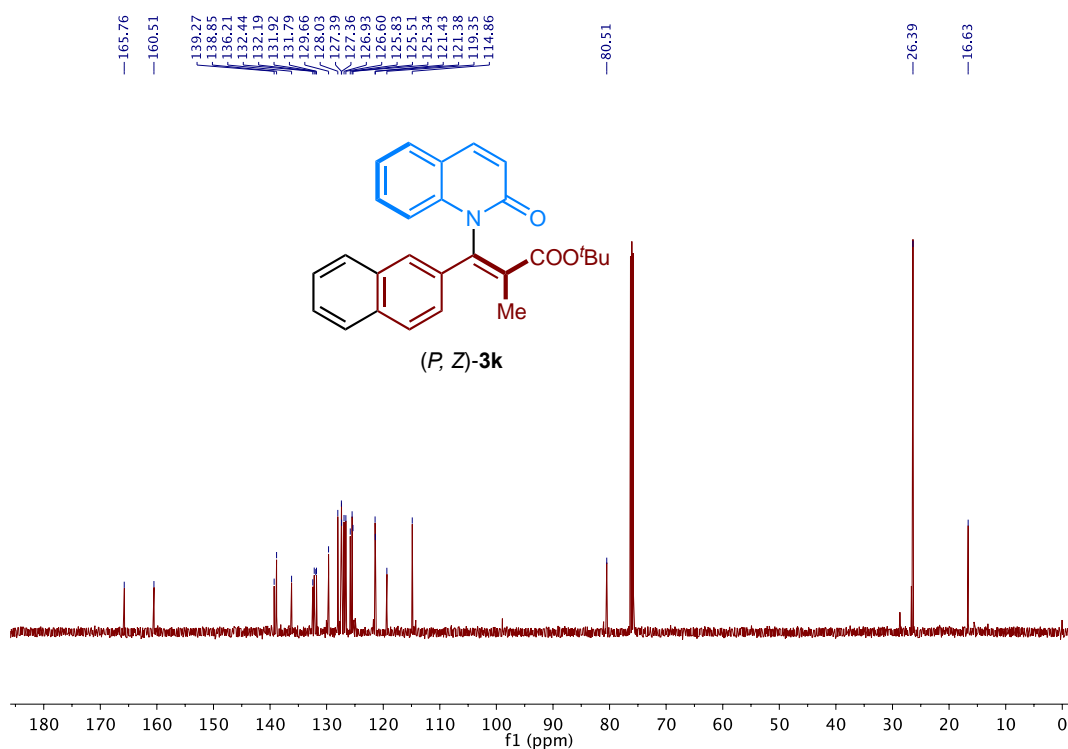

Supplementary Fig. 58. <sup>13</sup>C NMR spectrum of *(P, Z)*-3k.

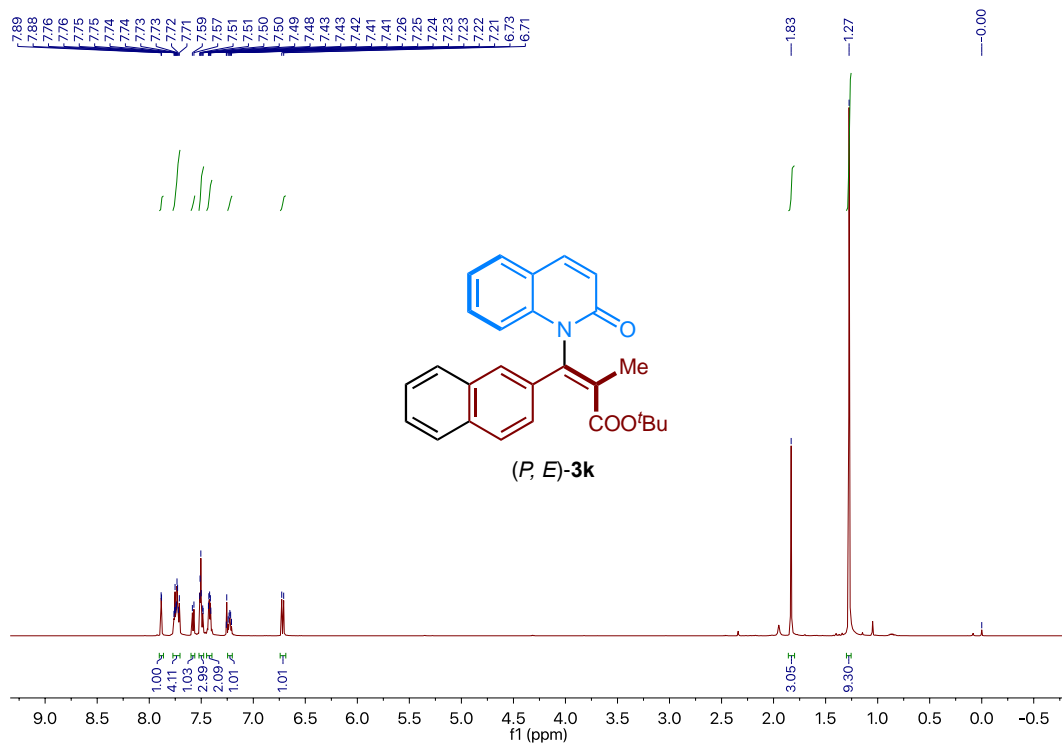

**Supplementary Fig. 59. <sup>1</sup>H NMR spectrum of (P, E)-3k**

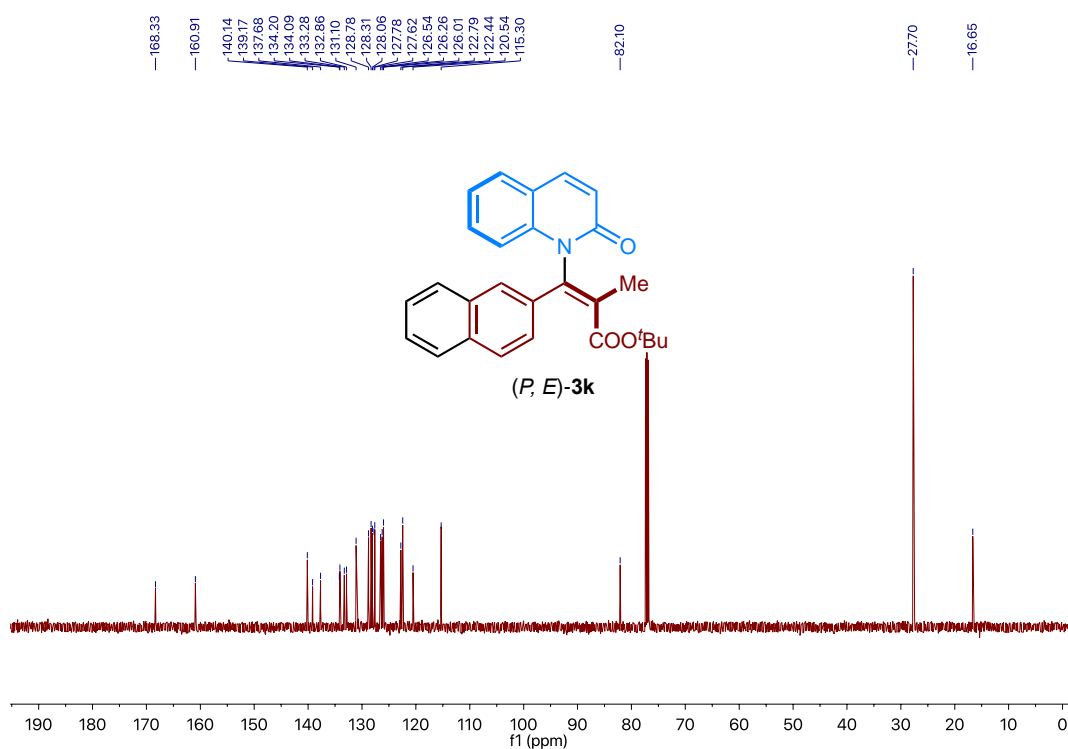

**Supplementary Fig. 60. <sup>13</sup>C NMR spectrum of (P, E)-3k.**

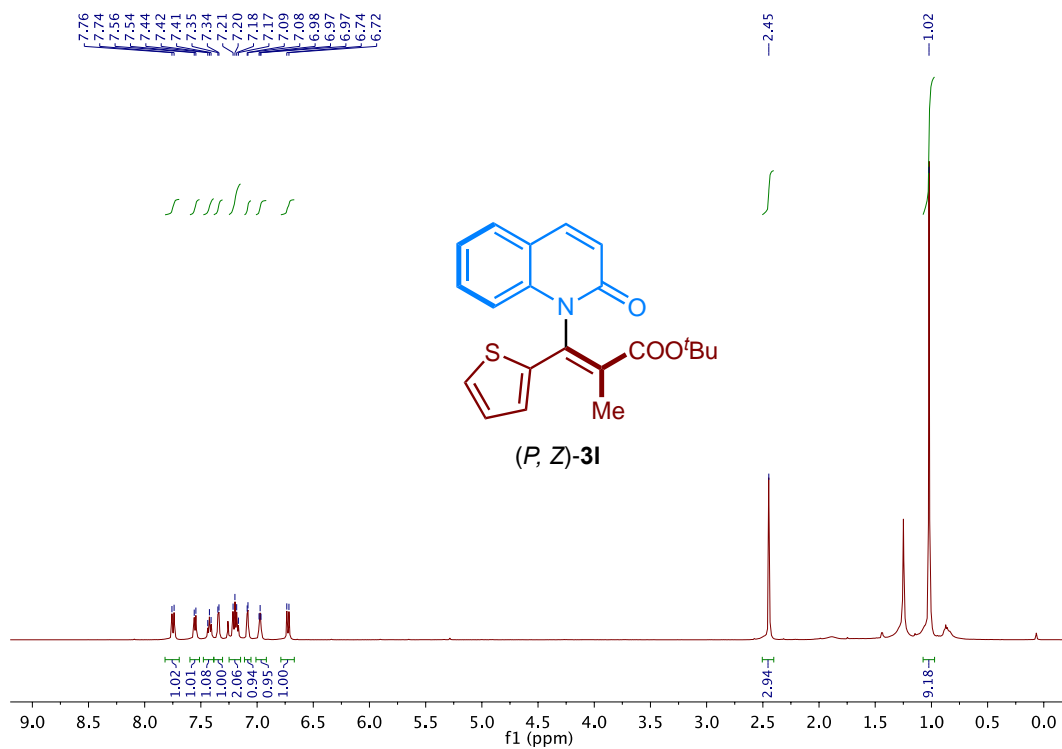

**Supplementary Fig. 61. <sup>1</sup>H NMR spectrum of (P, Z)-3I**

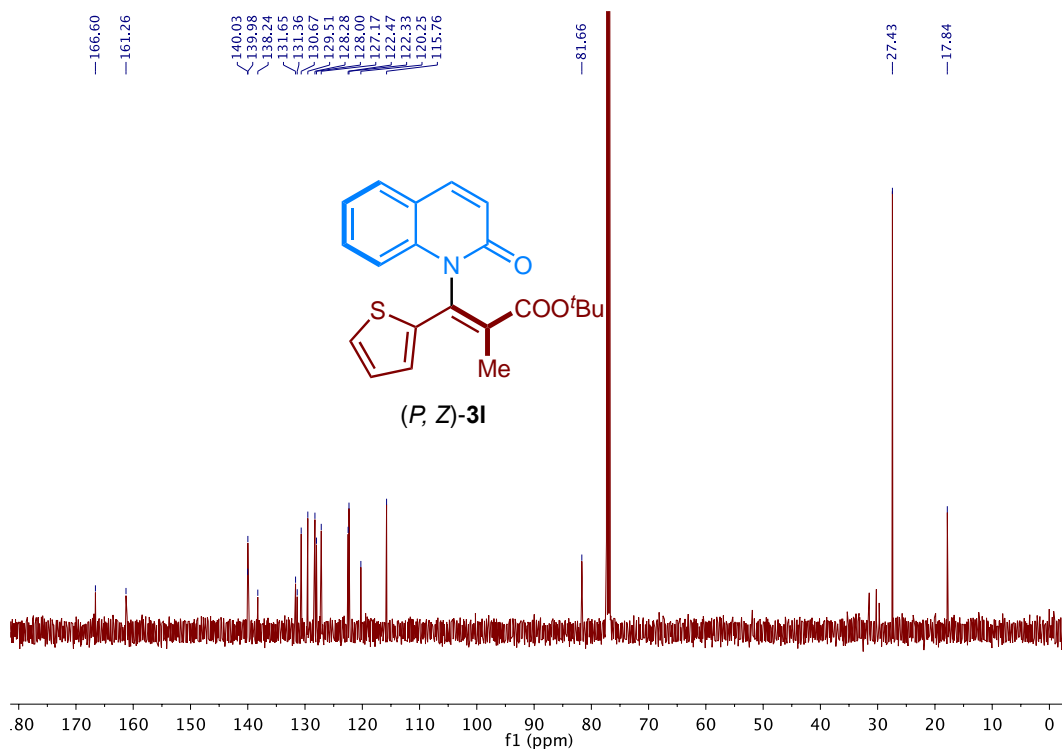

**Supplementary Fig. 62. <sup>13</sup>C NMR spectrum of (P, Z)-3I.**

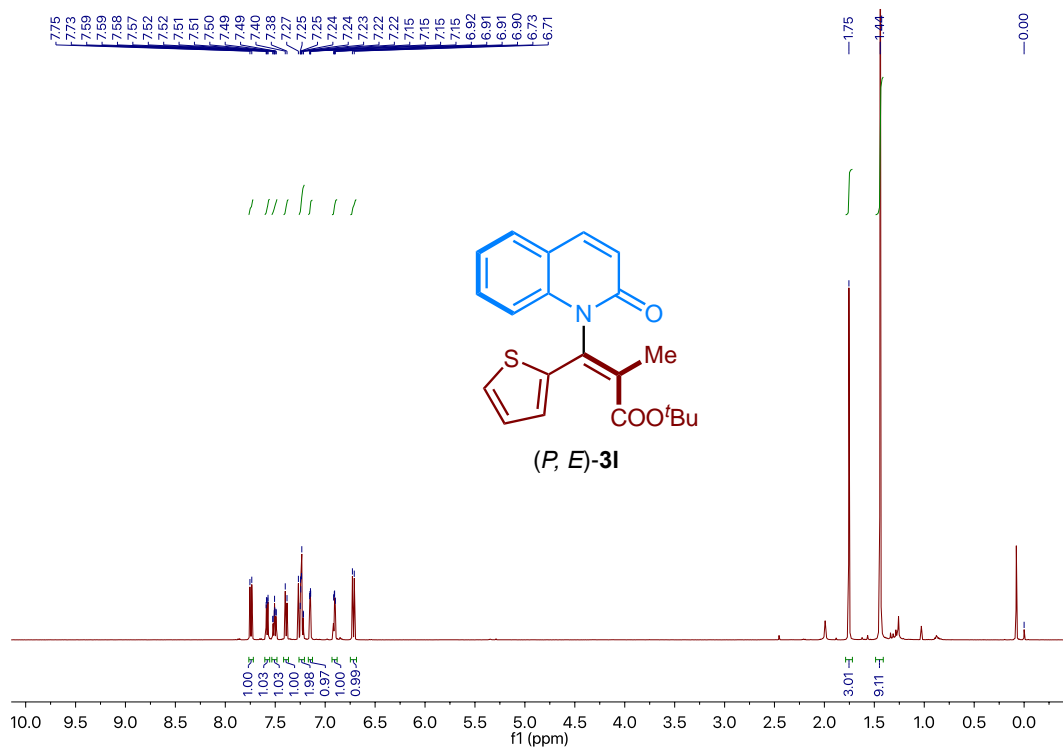

**Supplementary Fig. 63. <sup>1</sup>H NMR spectrum of (P, E)-31**

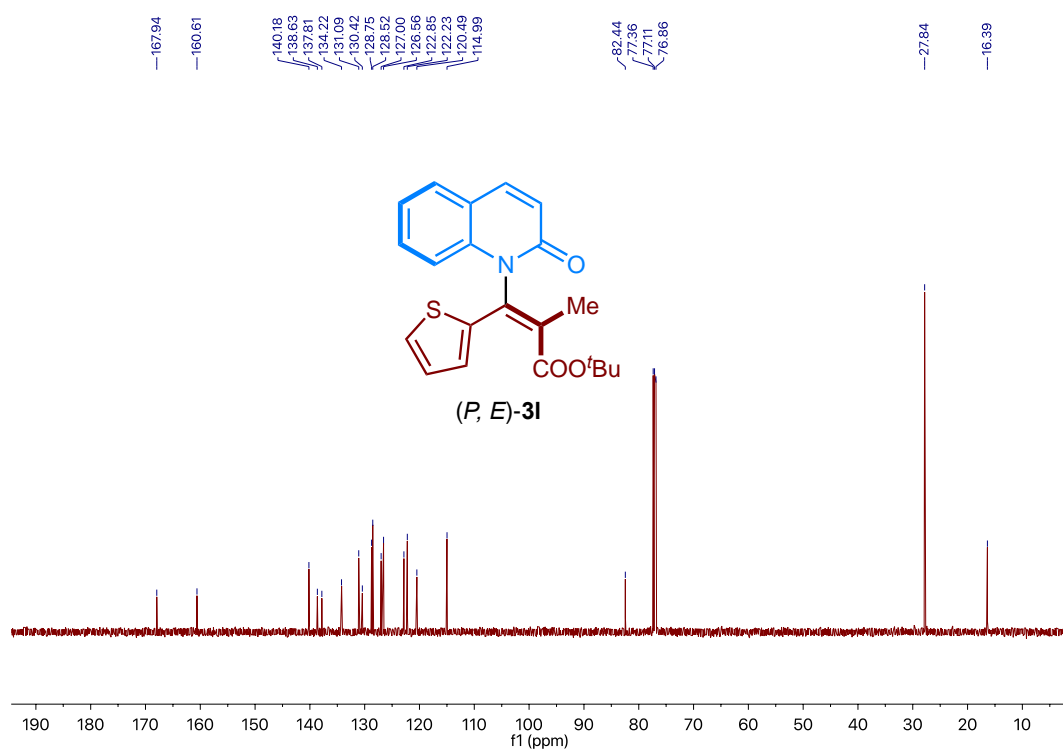

**Supplementary Fig. 64. <sup>13</sup>C NMR spectrum of (P, E)-31.**

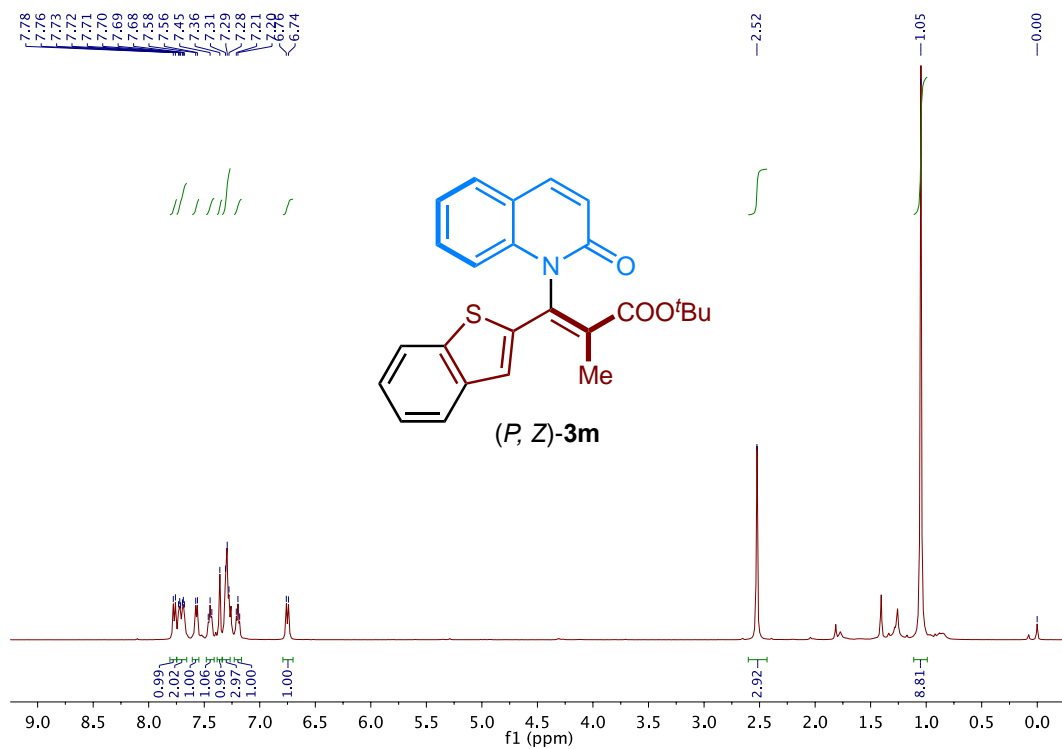

Supplementary Fig. 65.  $^1\text{H}$  NMR spectrum of *(P, Z)*-3m

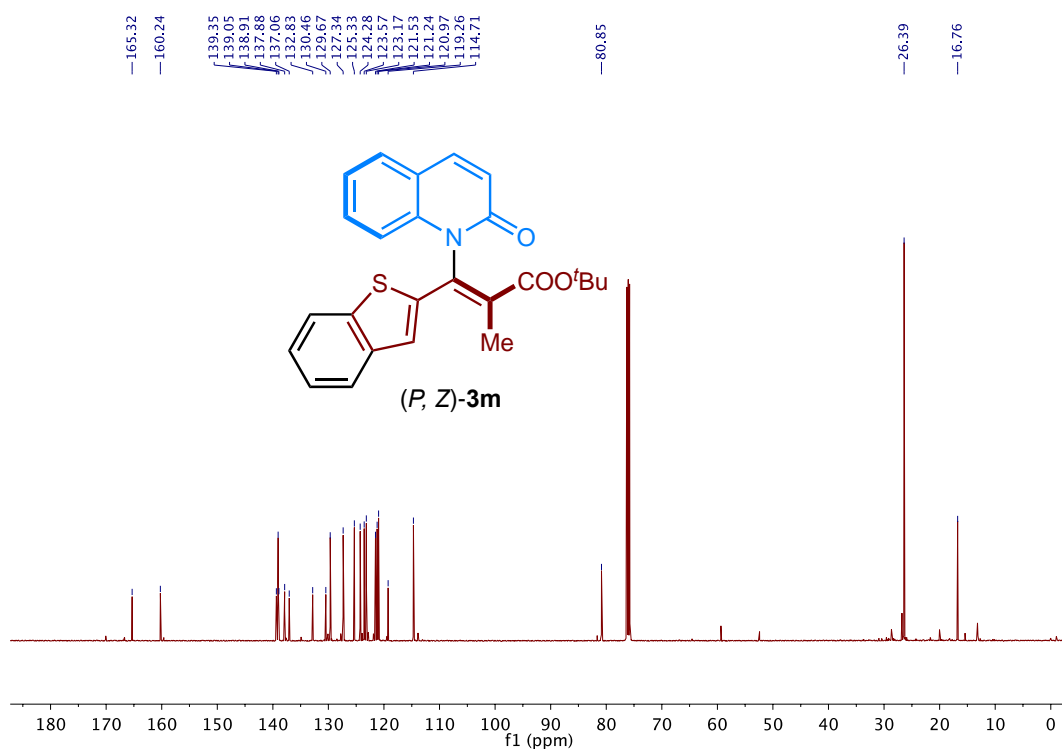

Supplementary Fig. 66.  $^{13}\text{C}$  NMR spectrum of *(P, Z)*-3m.

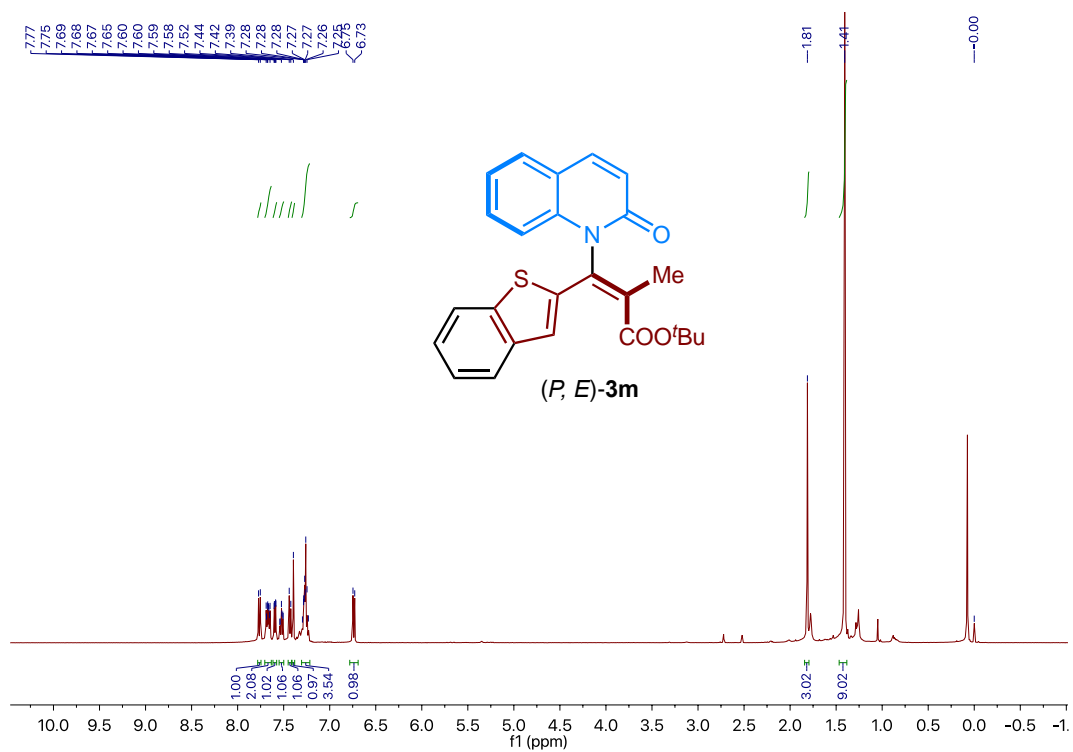

Supplementary Fig. 67. <sup>1</sup>H NMR spectrum of *(P, E)*-3m

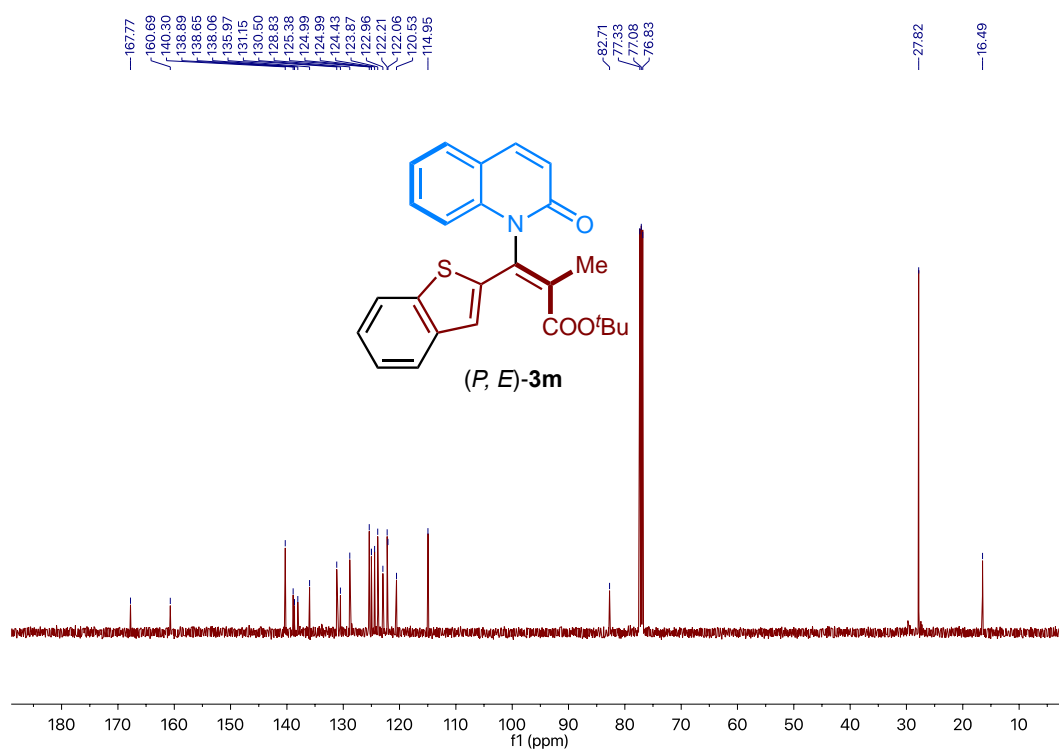

Supplementary Fig. 68. <sup>13</sup>C NMR spectrum of *(P, E)*-3m.

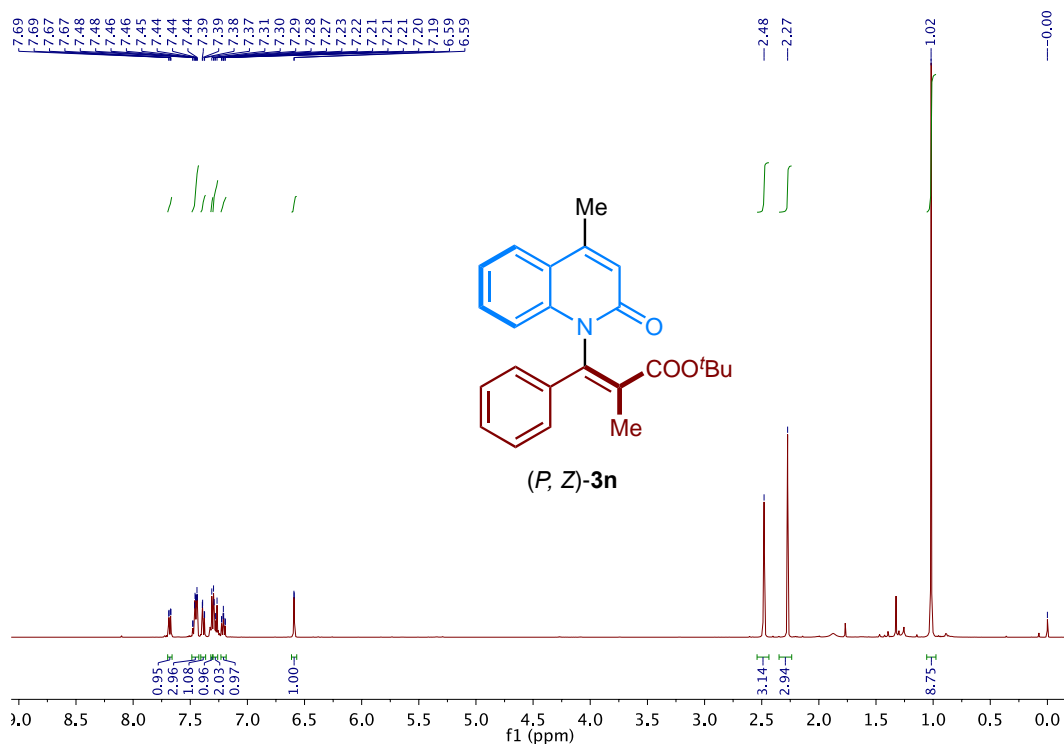

Supplementary Fig. 69. <sup>1</sup>H NMR spectrum of (P, Z)-3n

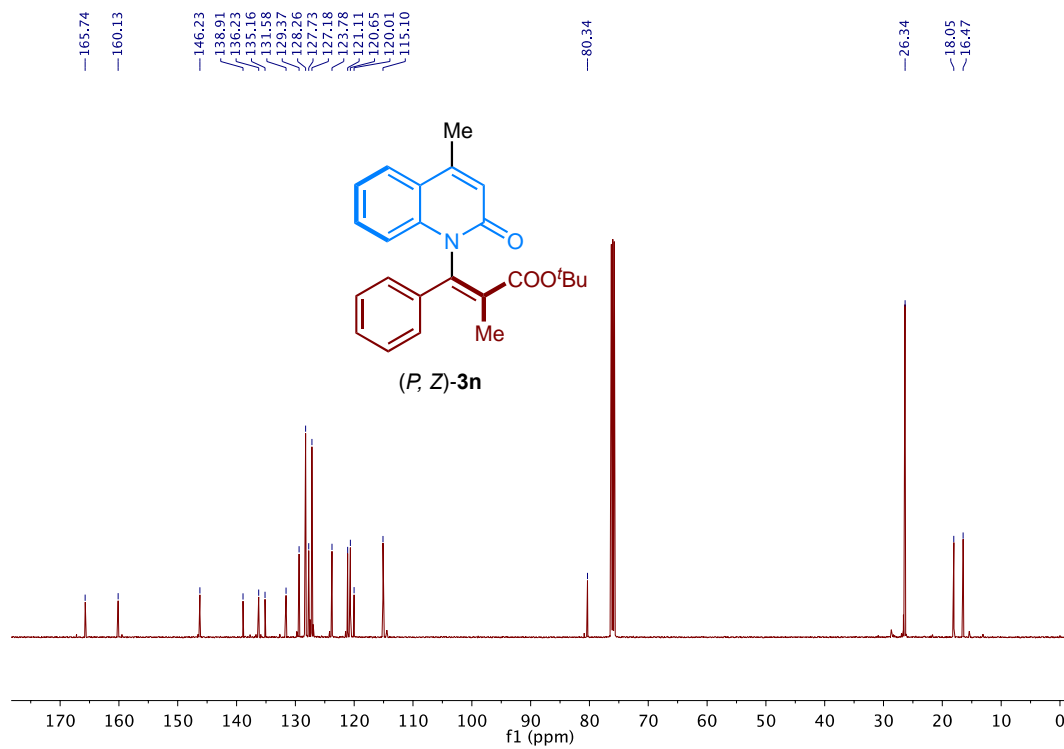

Supplementary Fig. 70. <sup>13</sup>C NMR spectrum of (P, Z)-3n



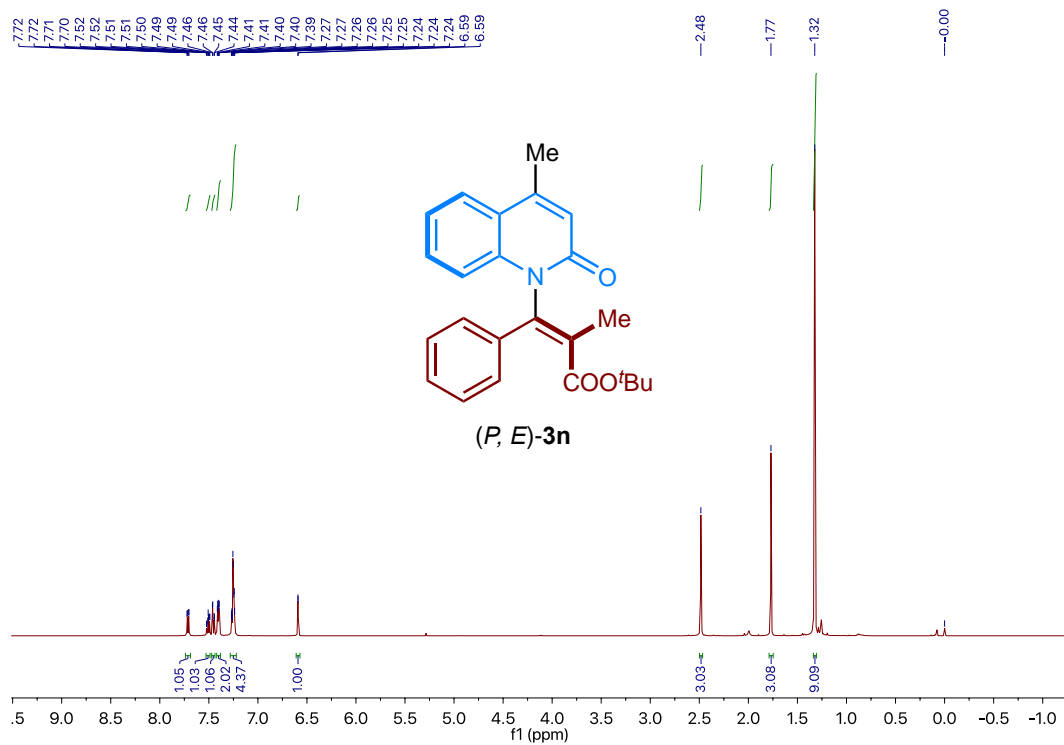

Supplementary Fig. 71.  $^1\text{H NMR}$  spectrum of  $(P, E)$ -3n

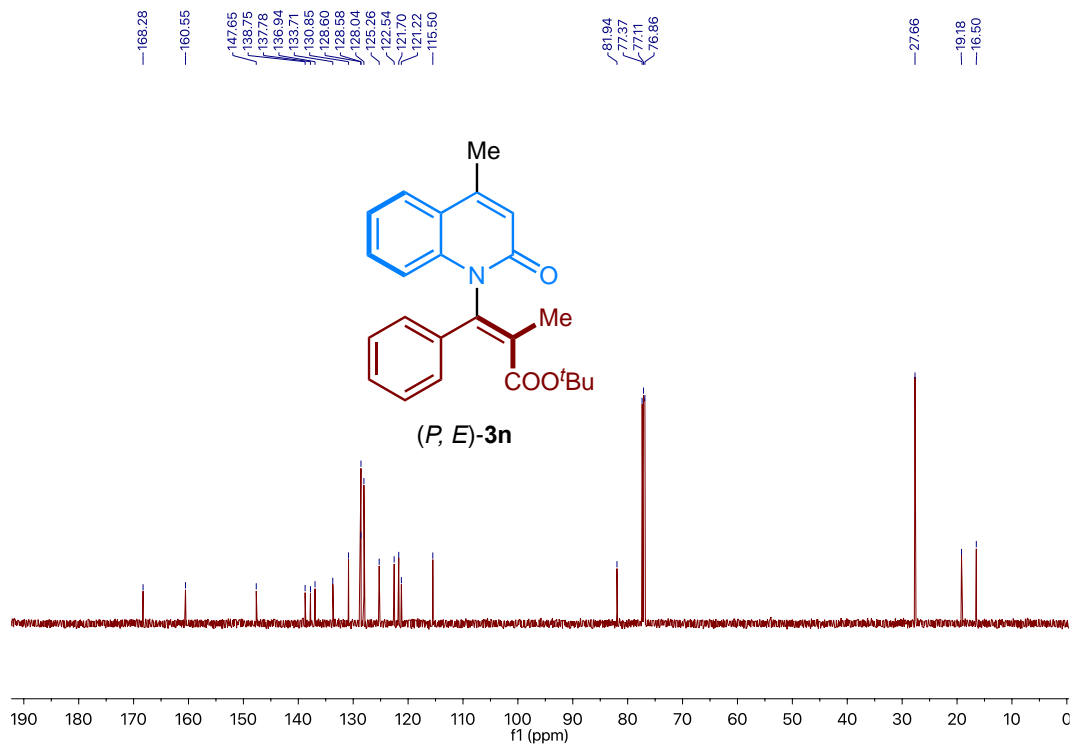

Supplementary Fig. 72.  $^{13}\text{C NMR}$  spectrum of  $(P, E)$ -3n

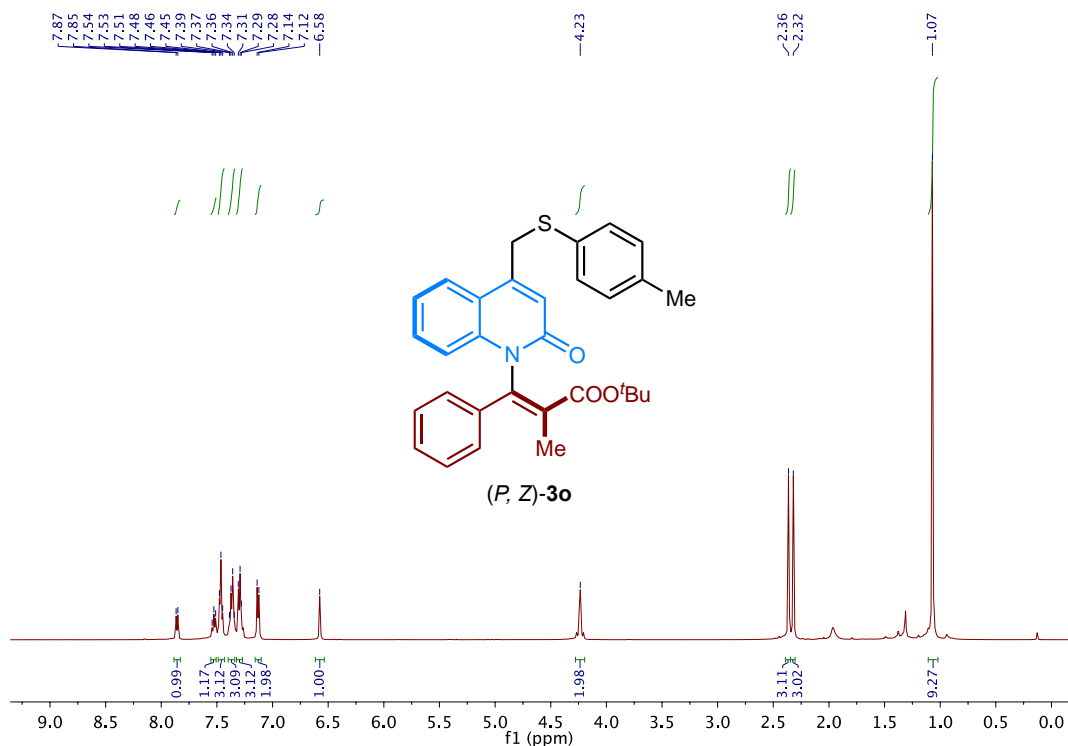

Supplementary Fig. 73. <sup>1</sup>H NMR spectrum of (P, Z)-3o

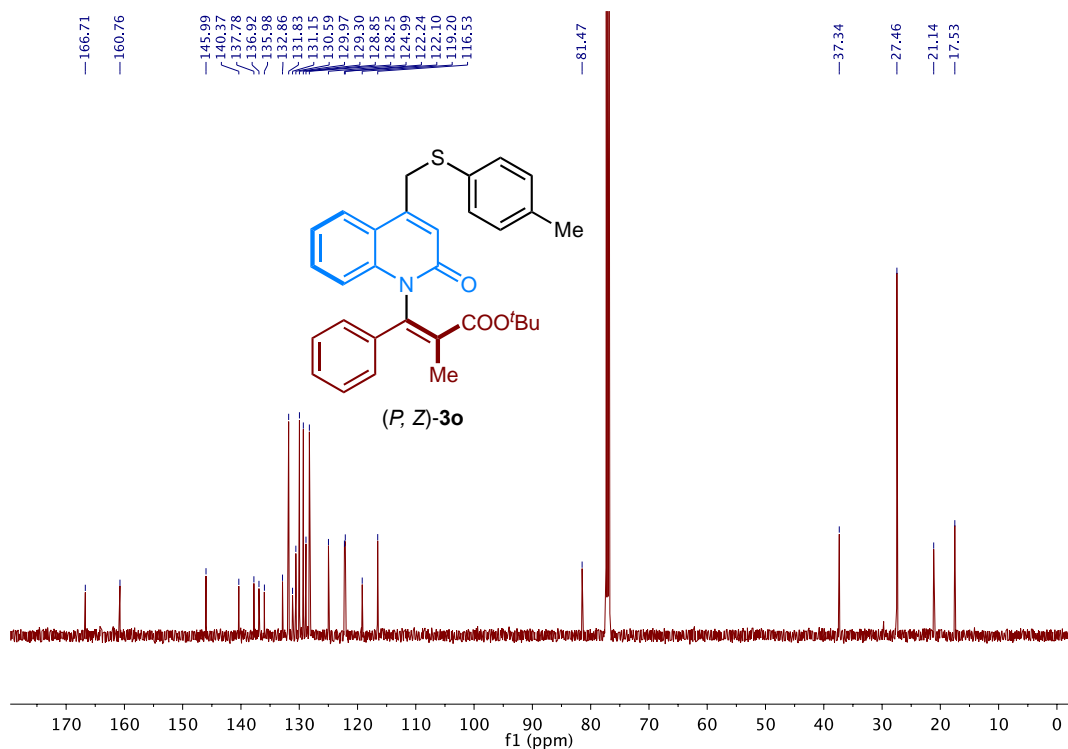

Supplementary Fig. 74. <sup>13</sup>C NMR spectrum of (P, Z)-3o

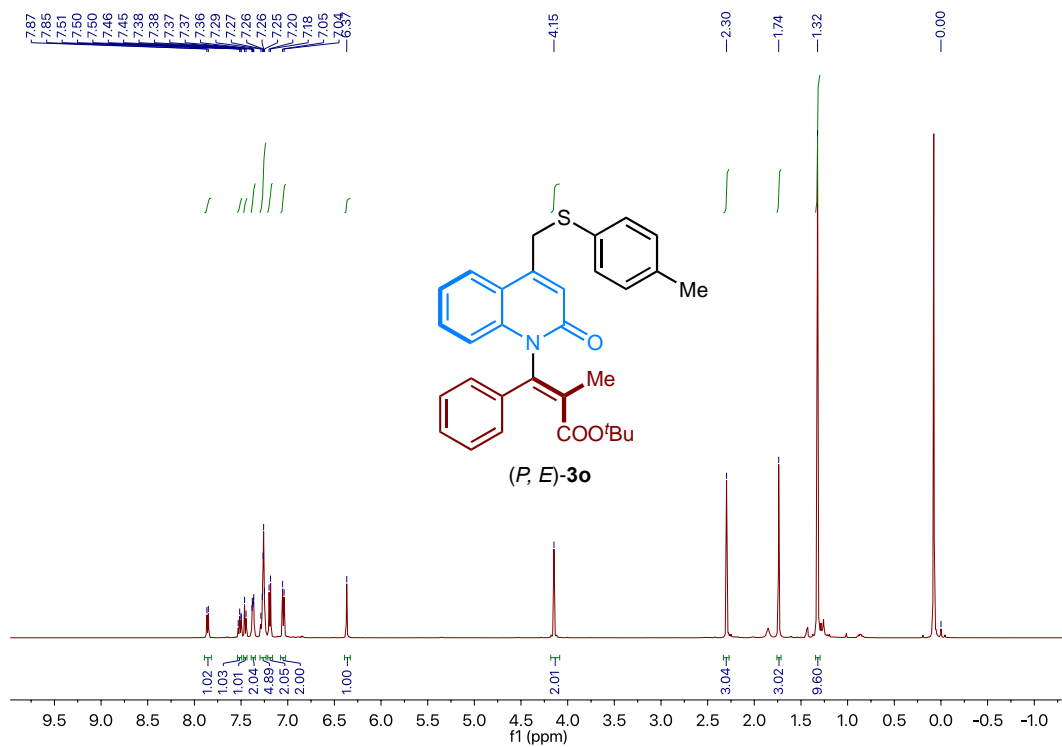

Supplementary Fig. 75.  $^1\text{H}$  NMR spectrum of *(P, E)*-**3o**

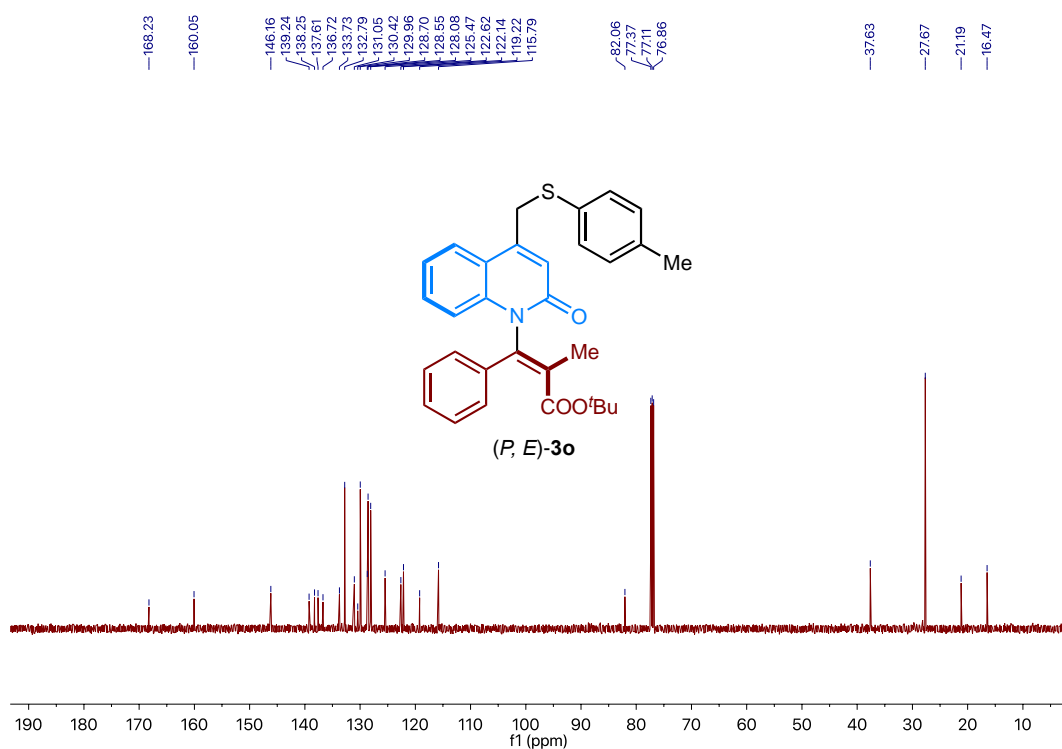

Supplementary Fig. 76.  $^{13}\text{C}$  NMR spectrum of *(P, E)*-**3o**

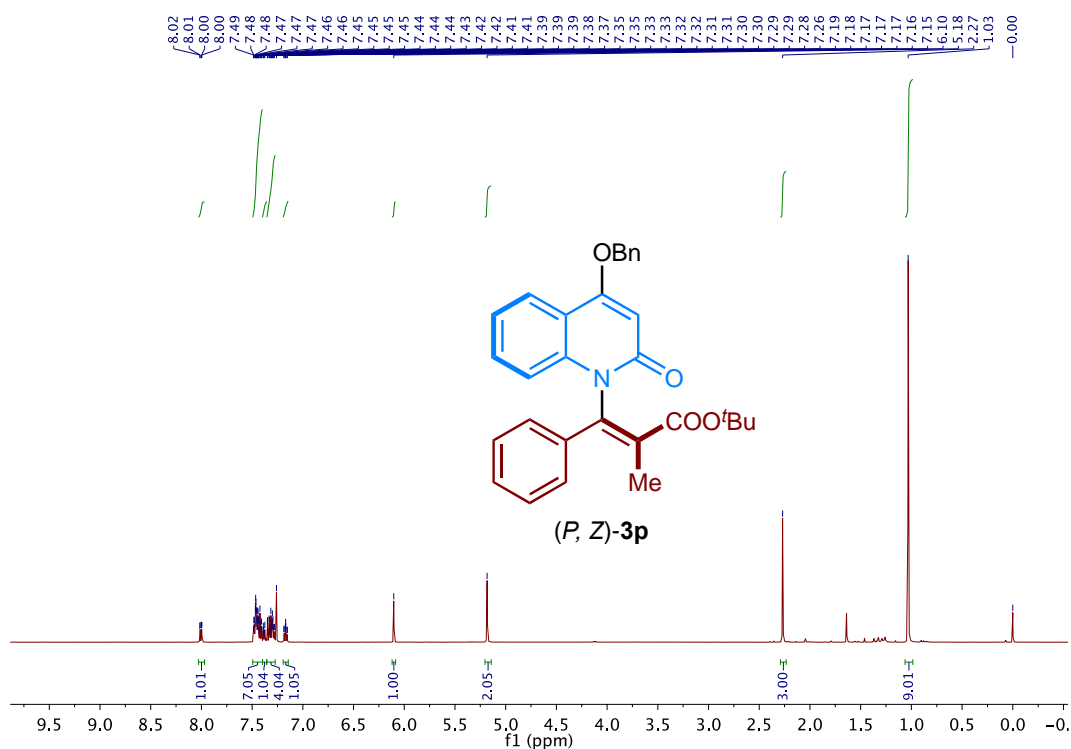

Supplementary Fig. 77.  $^1\text{H}$  NMR spectrum of (P, Z)-3p

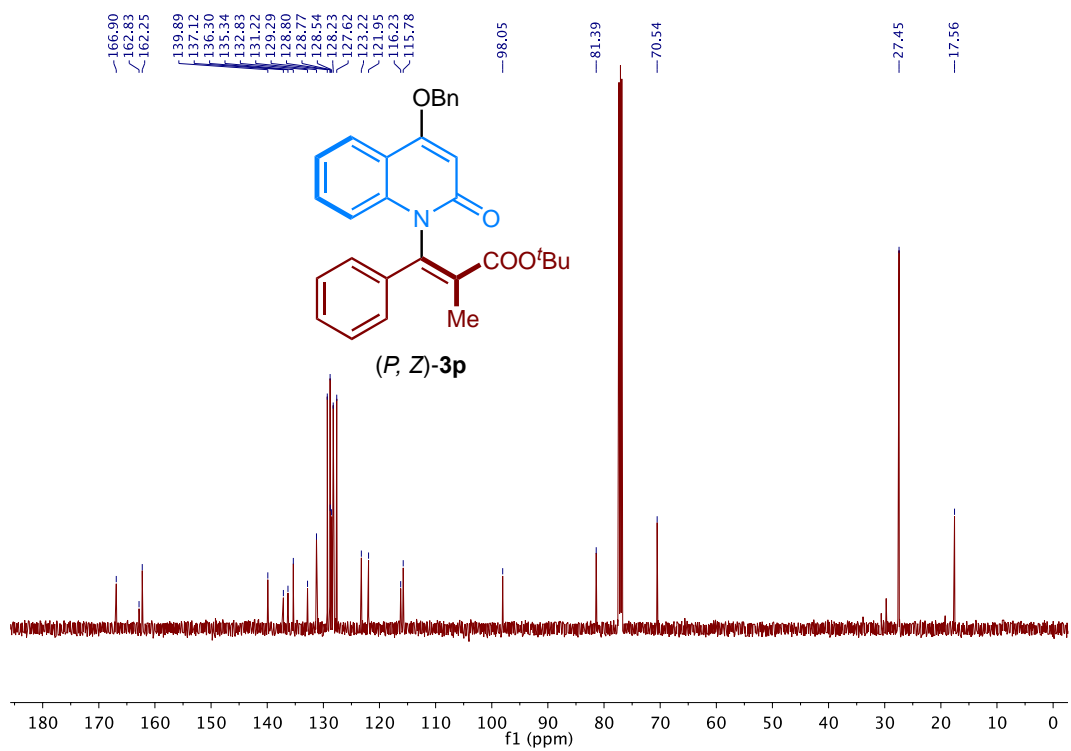

Supplementary Fig. 78.  $^{13}\text{C}$  NMR spectrum of (P, Z)-3p

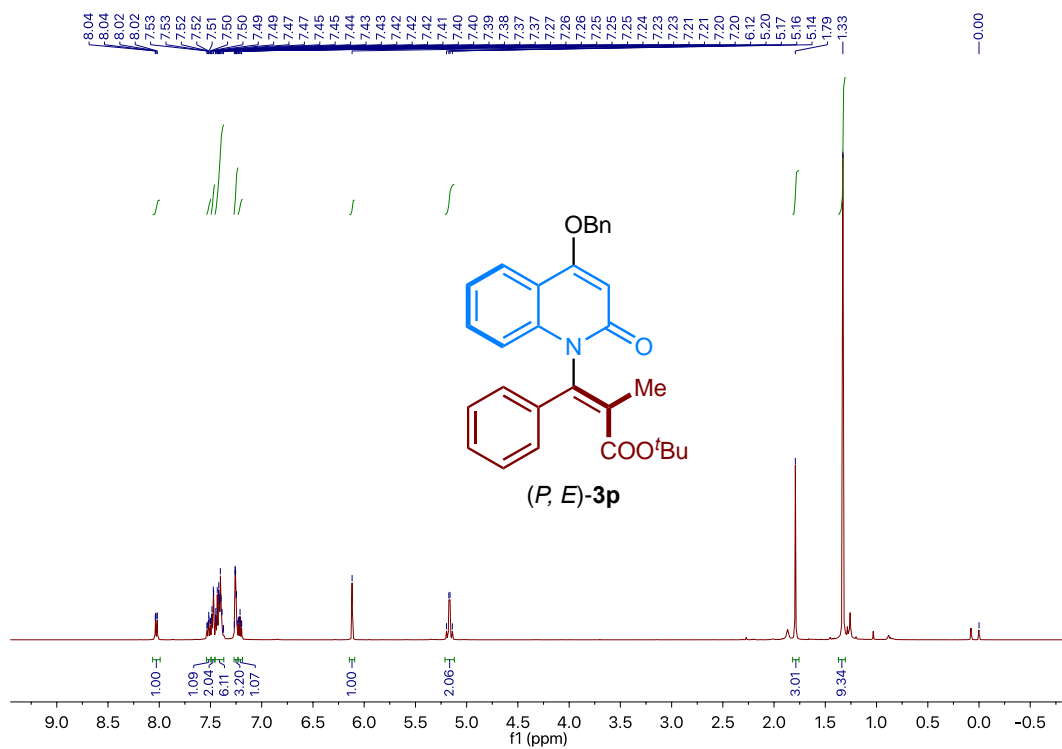

Supplementary Fig. 79. <sup>1</sup>H NMR spectrum of **(P, E)-3p**

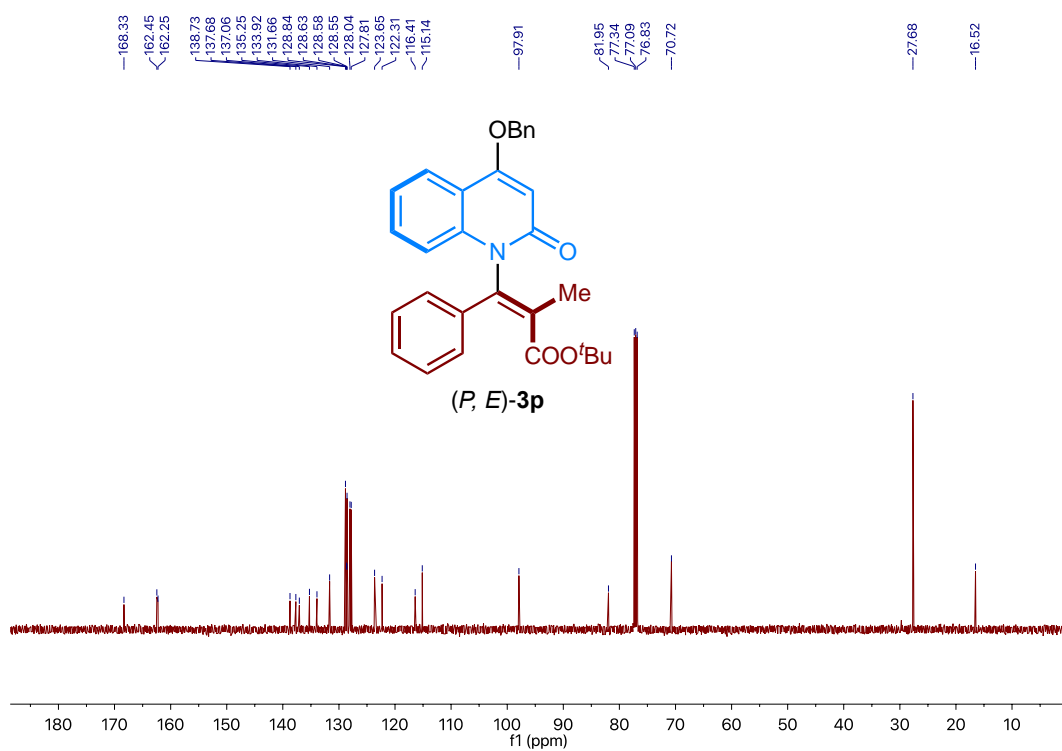

Supplementary Fig. 80. <sup>13</sup>C NMR spectrum of **(P, E)-3p**

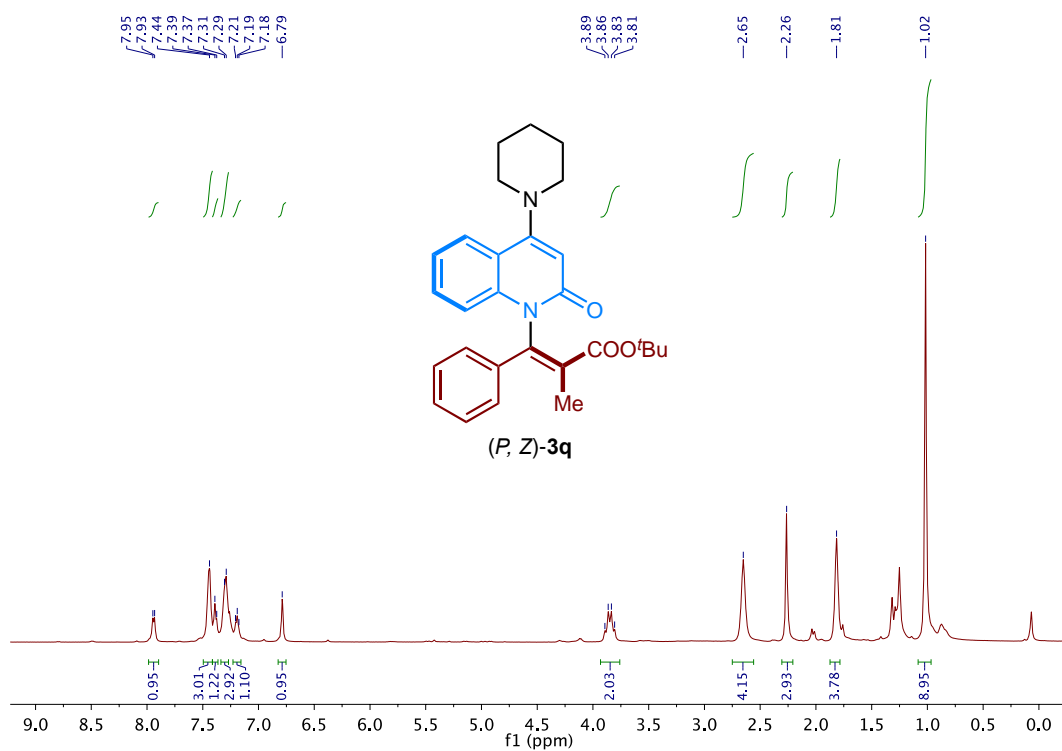

Supplementary Fig. 81. <sup>1</sup>H NMR spectrum of (P, Z)-3q

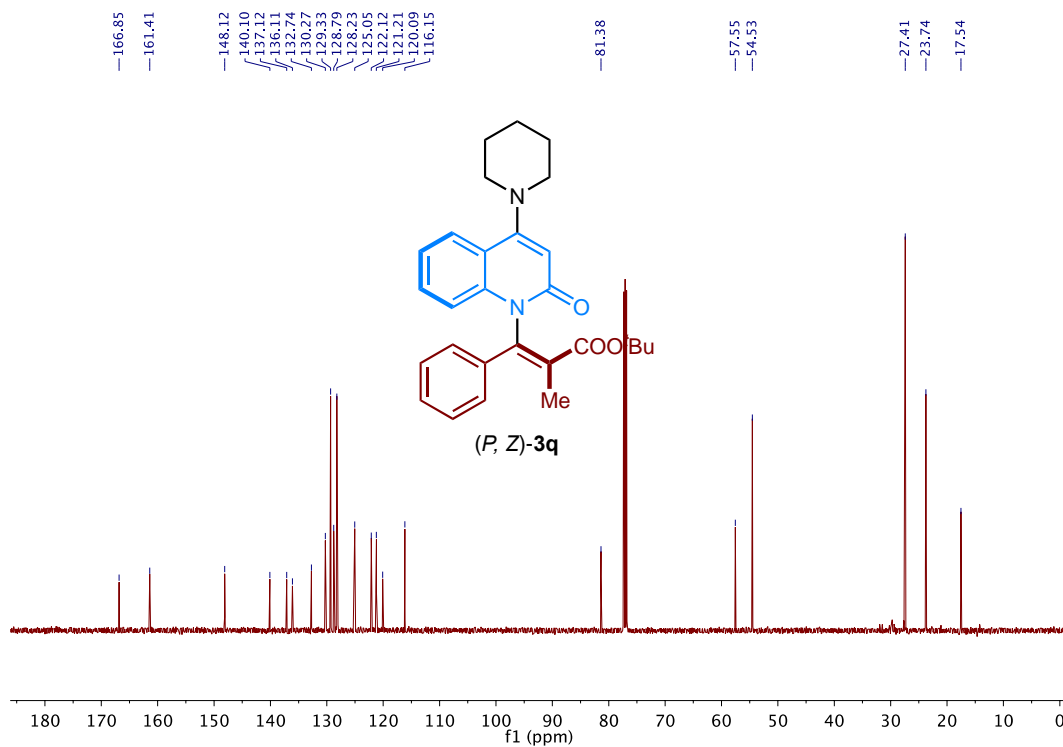

Supplementary Fig. 82. <sup>13</sup>C NMR spectrum of (P, Z)-3q

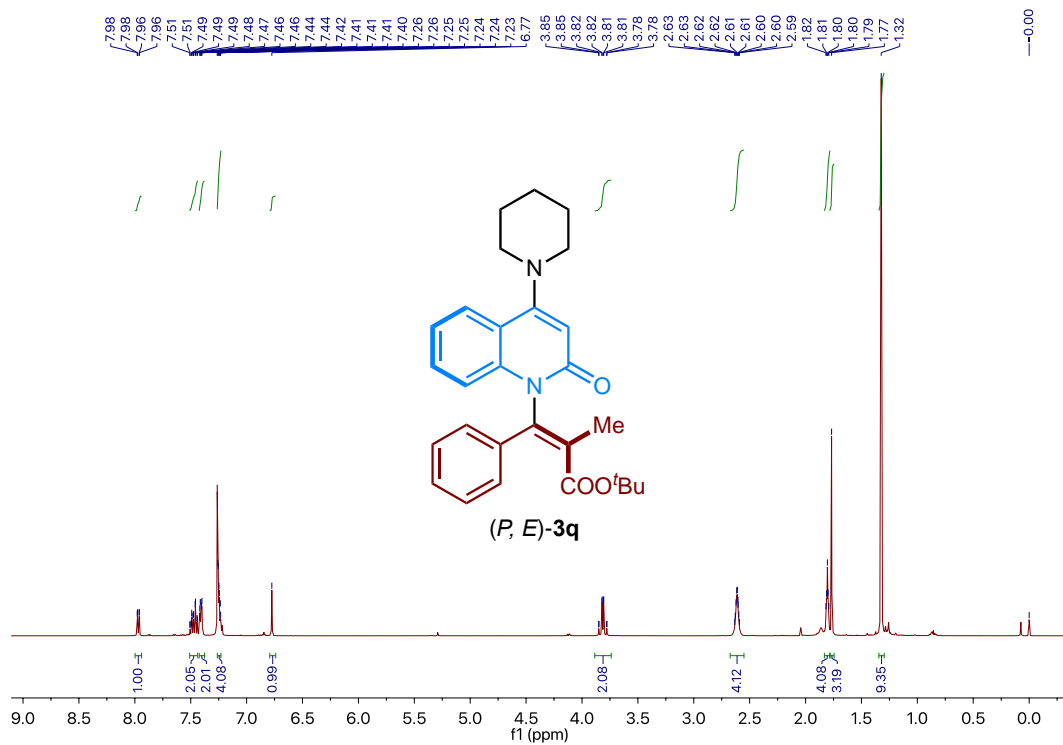

Supplementary Fig. 83. <sup>1</sup>H NMR spectrum of (P, E)-3q

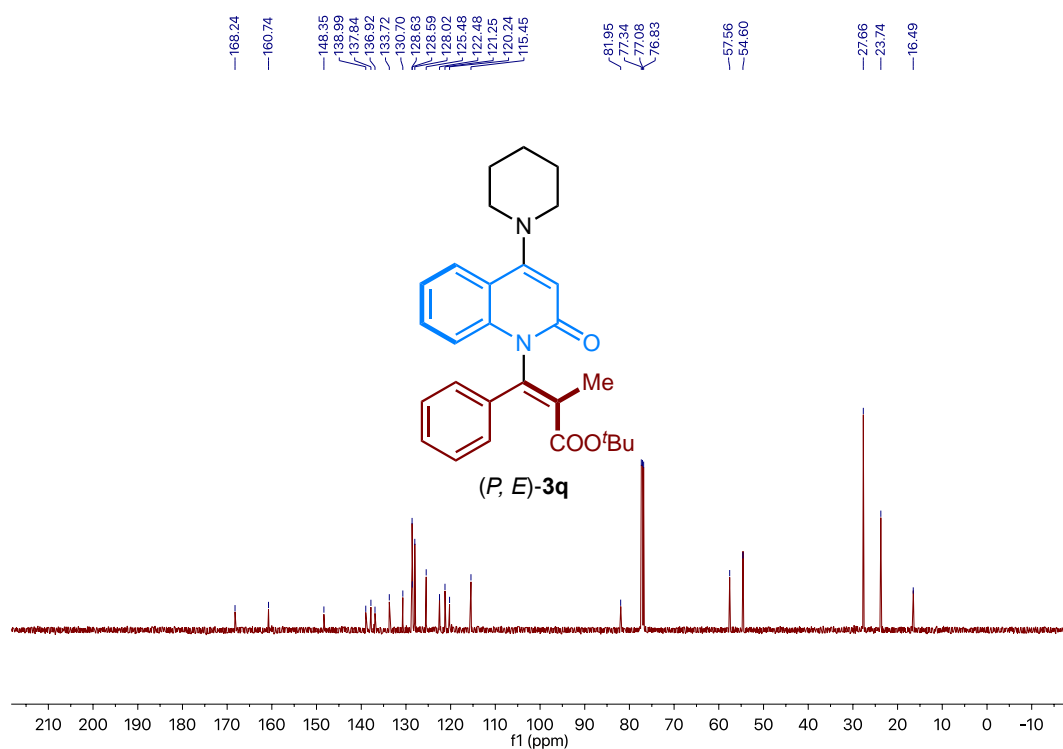

Supplementary Fig. 84. <sup>13</sup>C NMR spectrum of (P, E)-3q

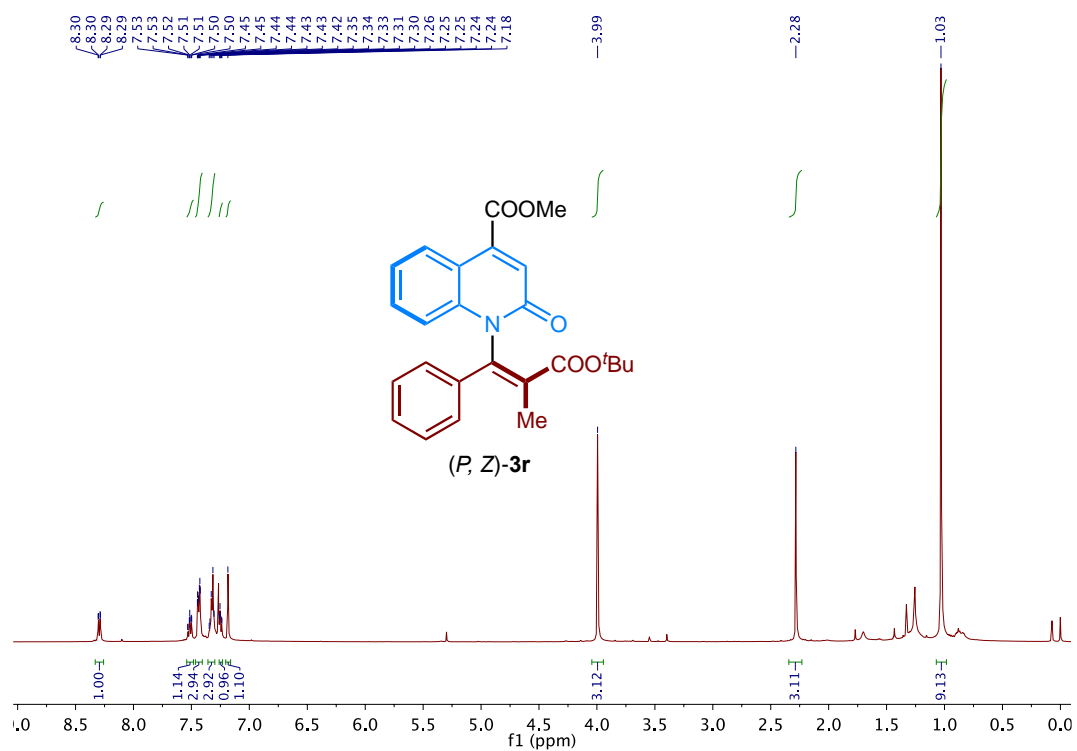

Supplementary Fig. 85.  $^1\text{H}$  NMR spectrum of (P, Z)-3r

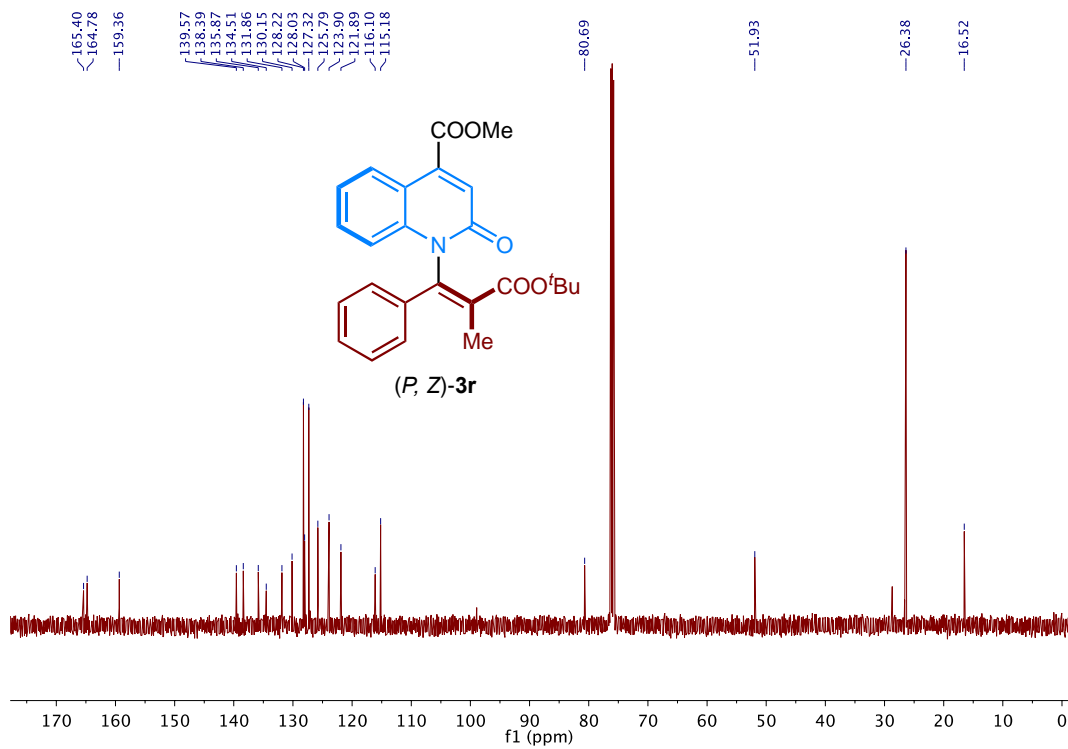

Supplementary Fig. 86.  $^{13}\text{C}$  NMR spectrum of (P, Z)-3r



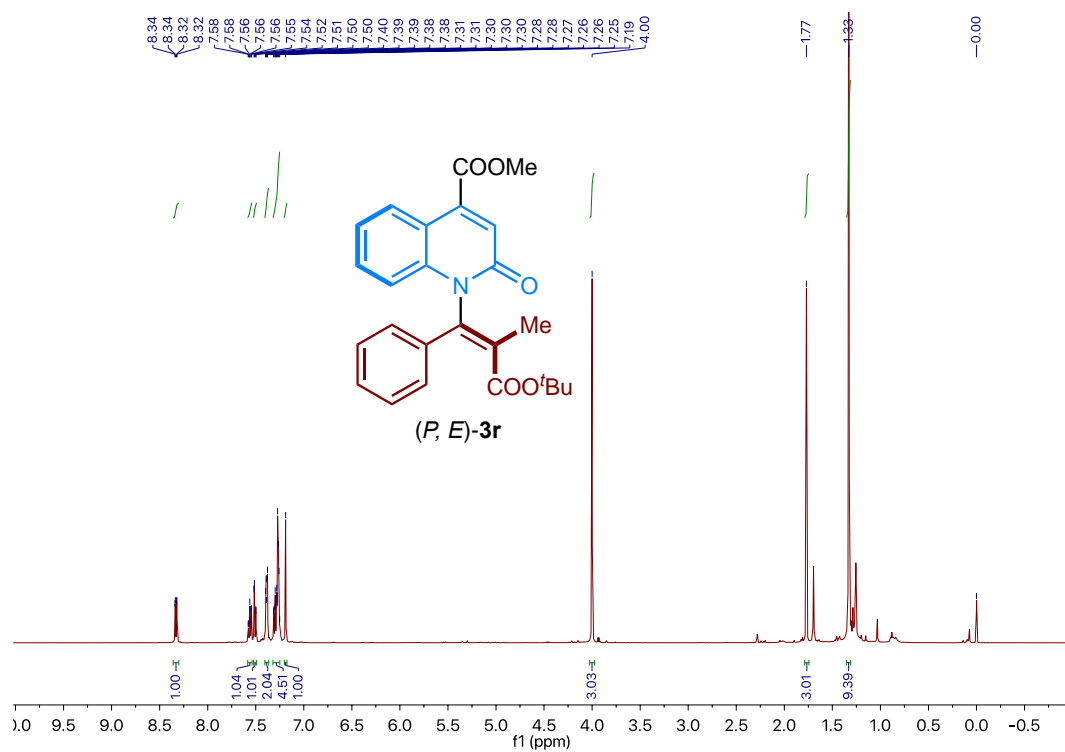

Supplementary Fig. 87.  $^1\text{H}$  NMR spectrum of *(P, E)*-3r

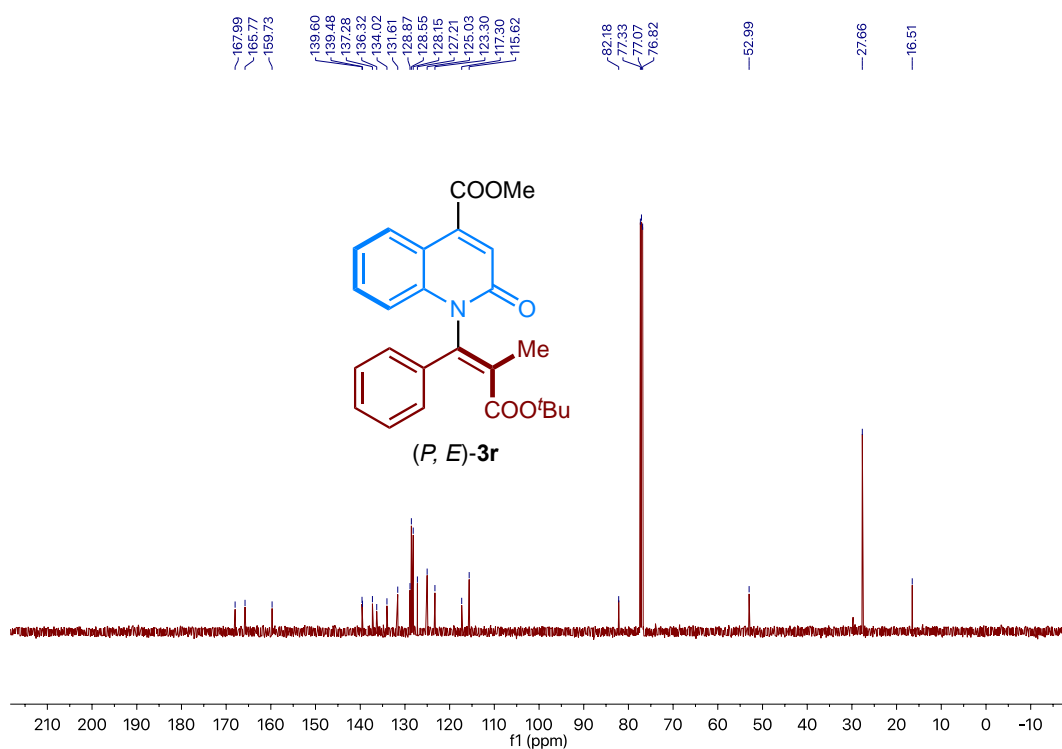

Supplementary Fig. 88.  $^{13}\text{C}$  NMR spectrum of *(P, E)*-3r

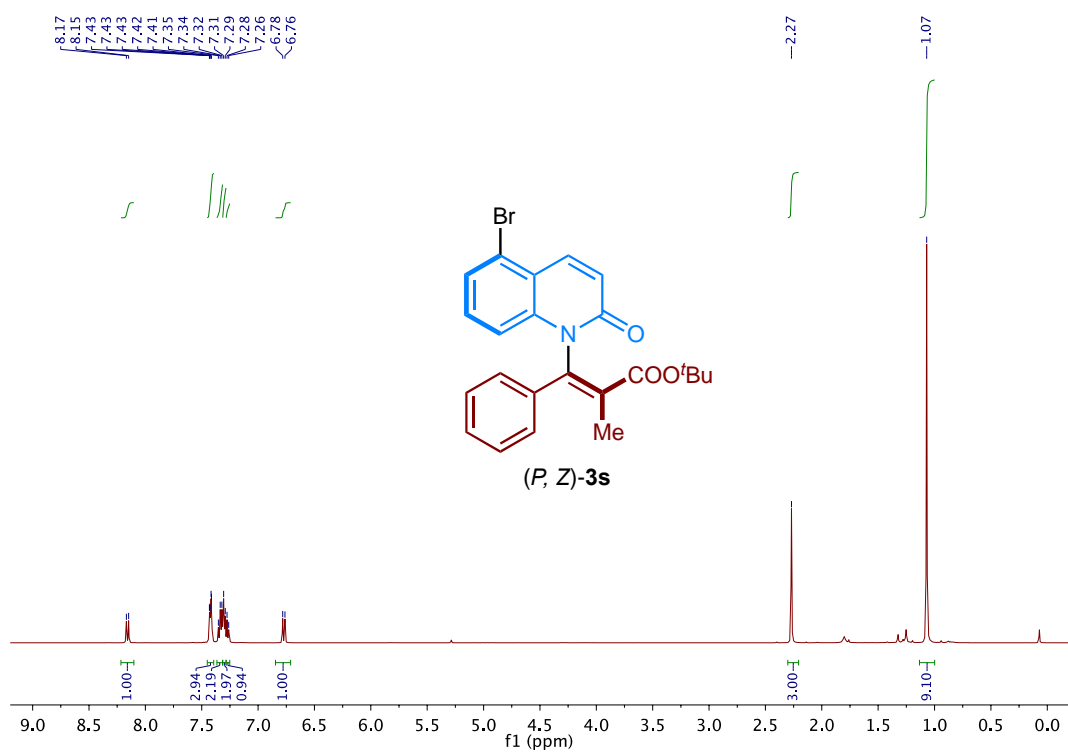

Supplementary Fig. 89.  $^1\text{H}$  NMR spectrum of (P, Z)-3s

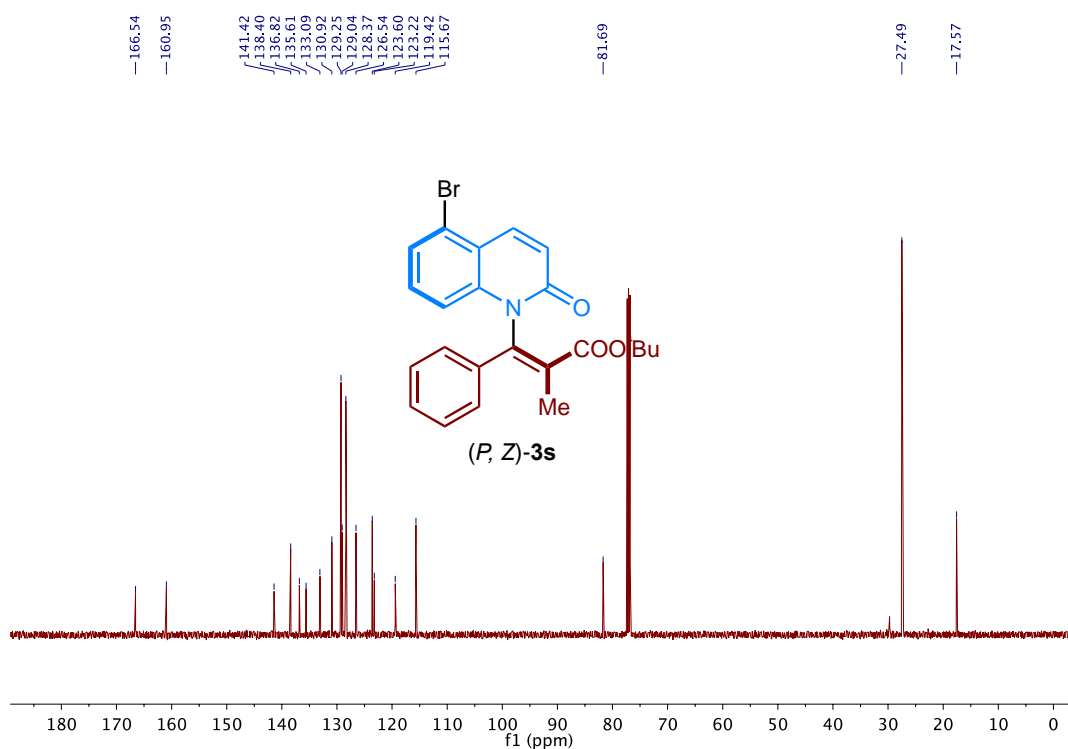

Supplementary Fig. 90.  $^{13}\text{C}$  NMR spectrum of (P, Z)-3s

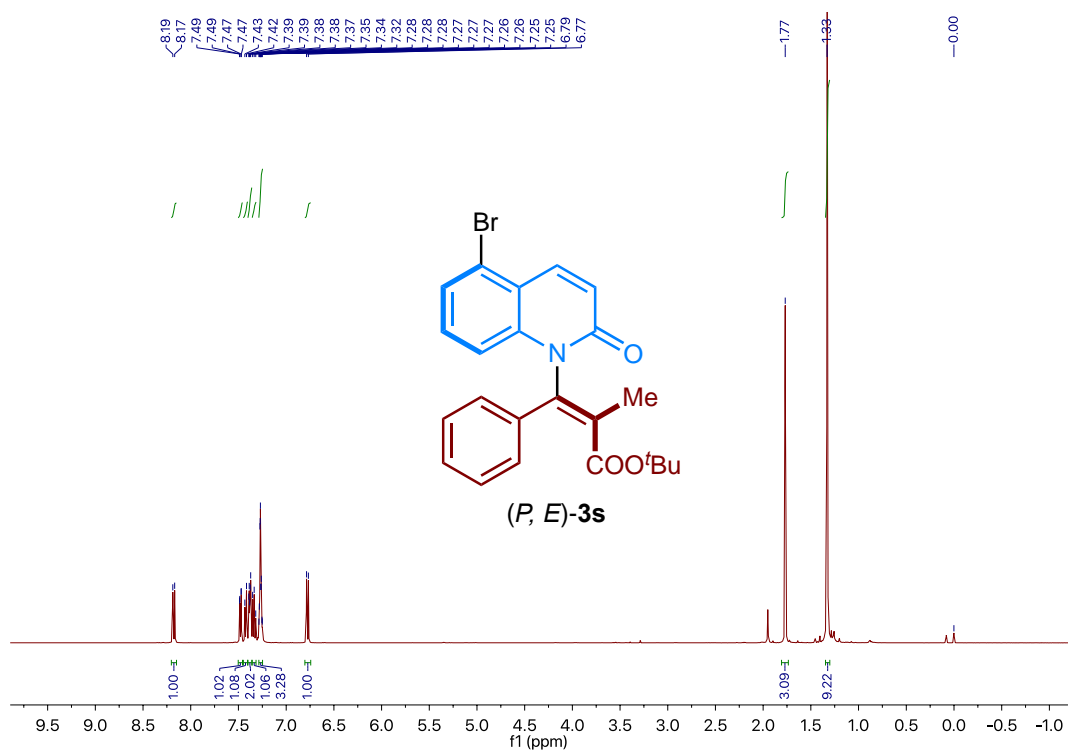

**Supplementary Fig. 91.  $^1\text{H}$  NMR spectrum of (P, E)-3s**

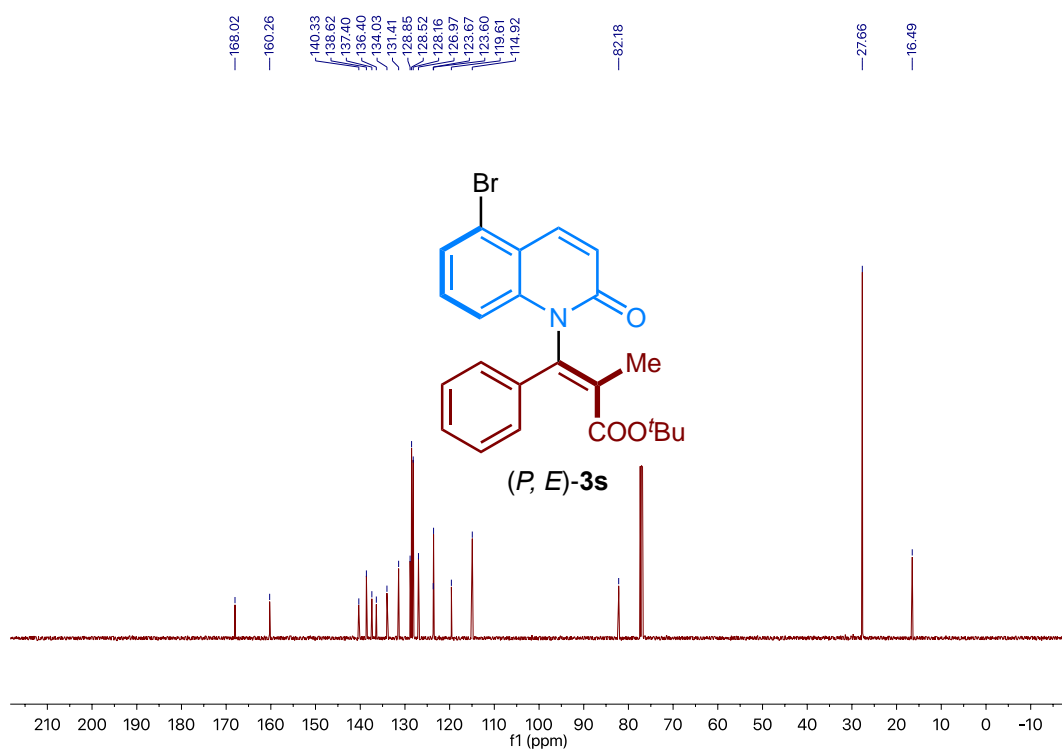

**Supplementary Fig. 92.  $^{13}\text{C}$  NMR spectrum of (P, E)-3s**

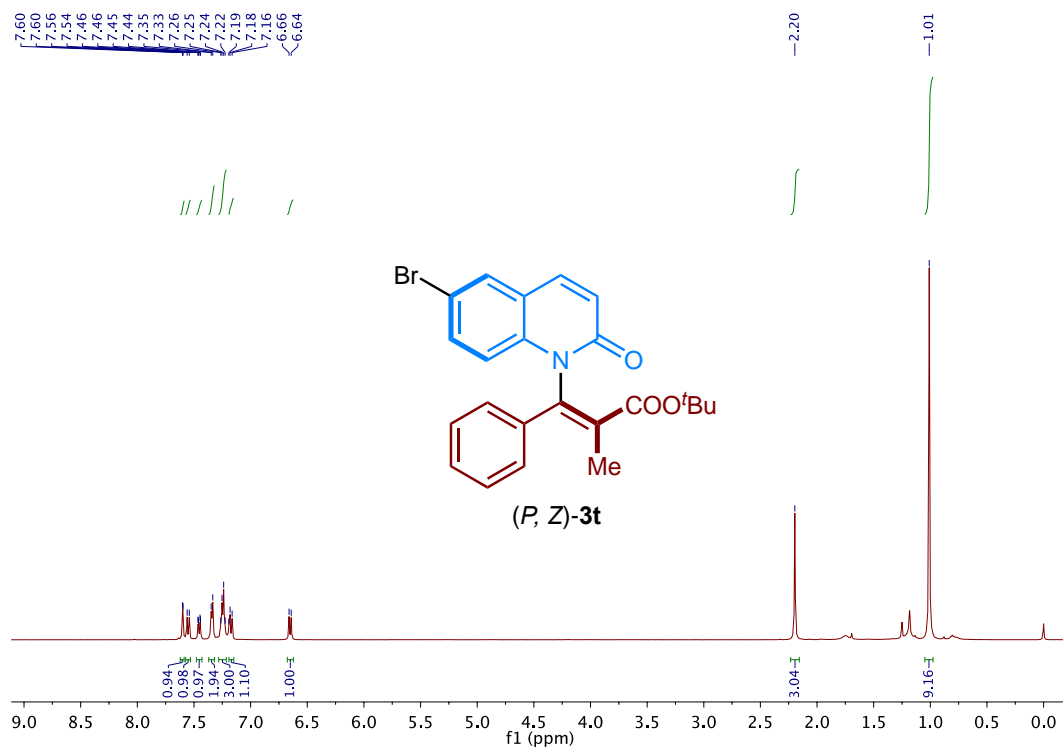

Supplementary Fig. 93. <sup>1</sup>H NMR spectrum of (P, Z)-3t

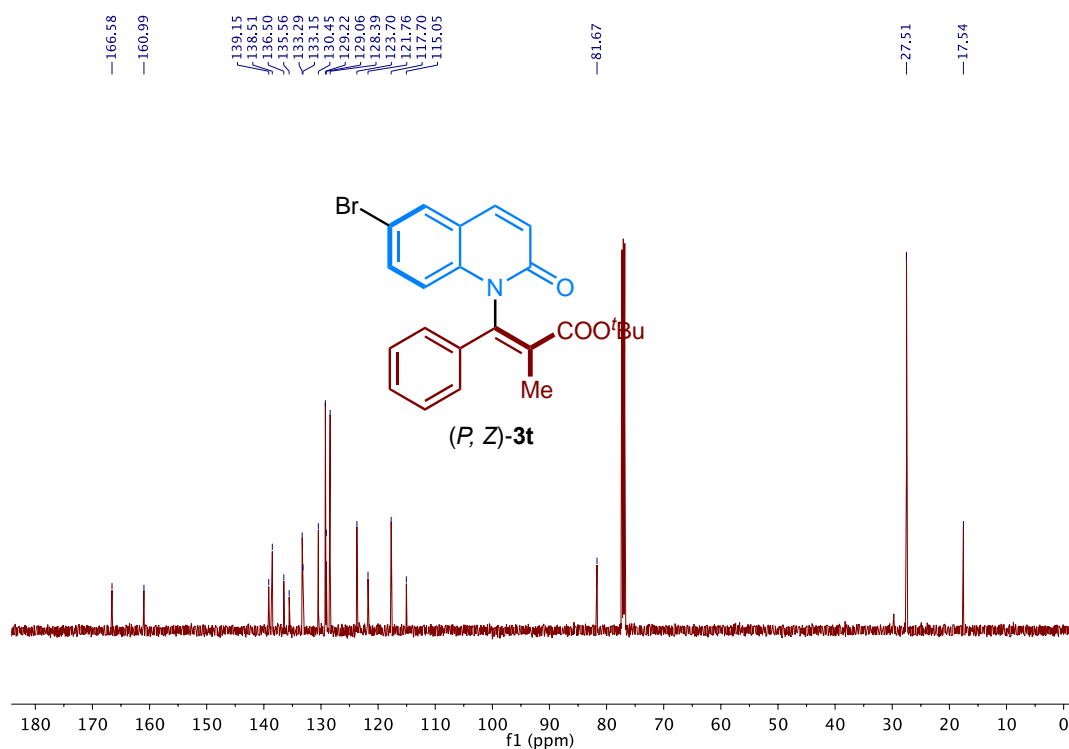

Supplementary Fig. 94. <sup>13</sup>C NMR spectrum of (P, Z)-3t

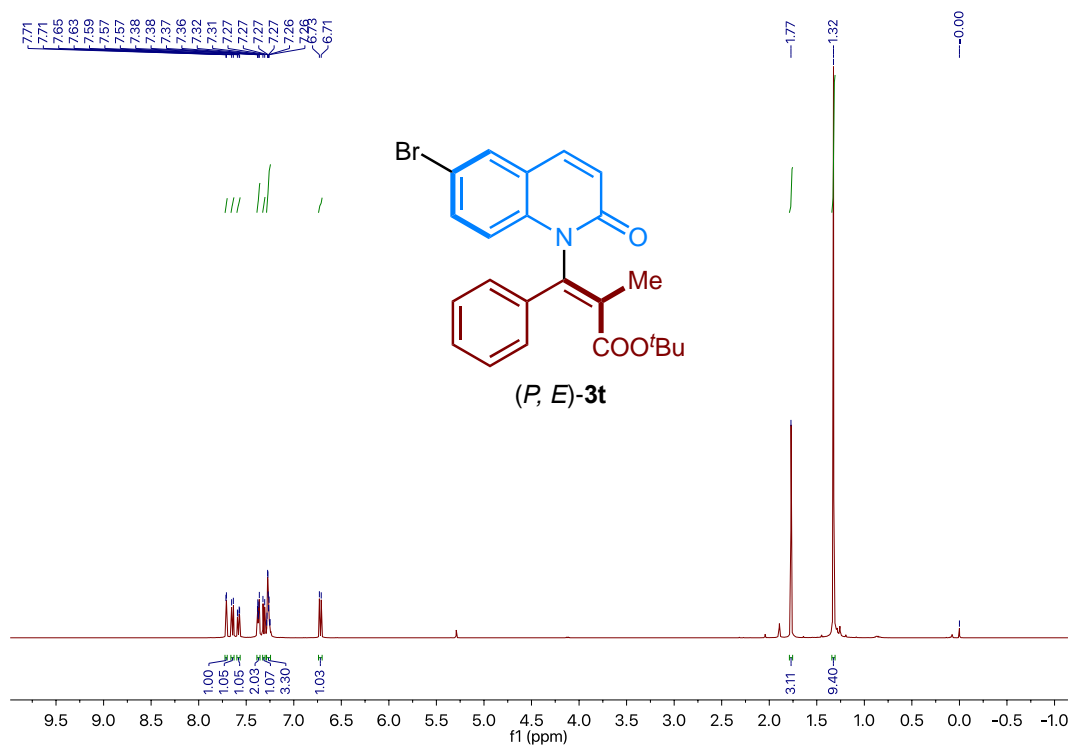

Supplementary Fig. 95. <sup>1</sup>H NMR spectrum of (P, E)-3t

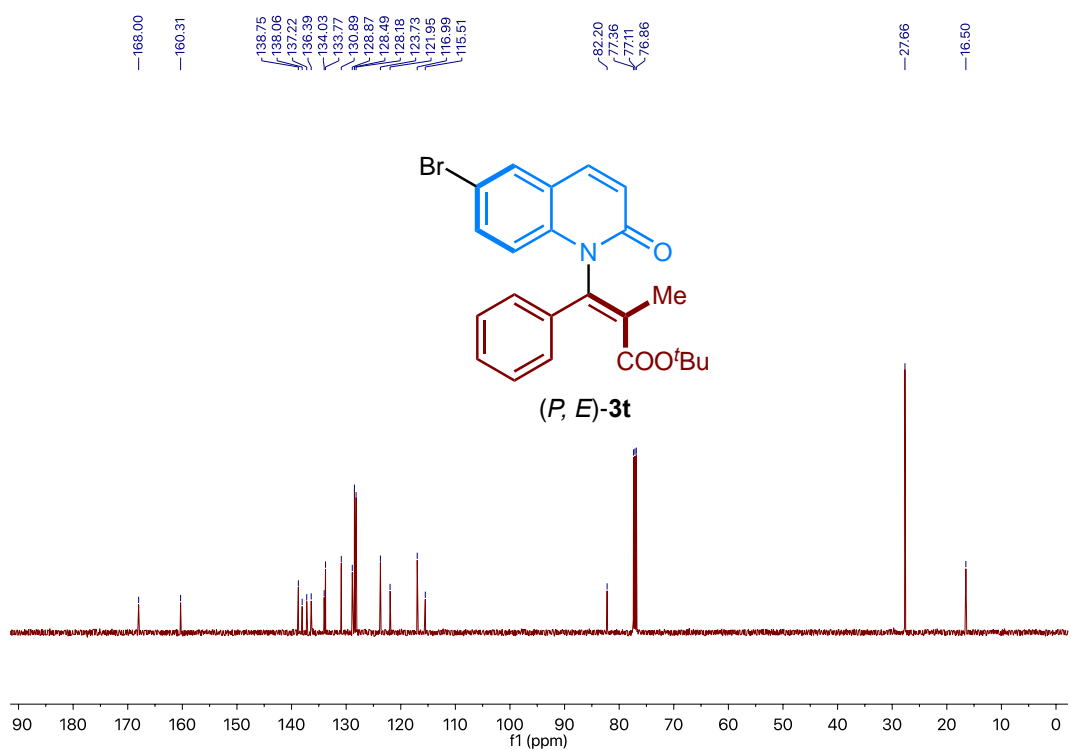

Supplementary Fig. 96. <sup>13</sup>C NMR spectrum of (P, E)-3t

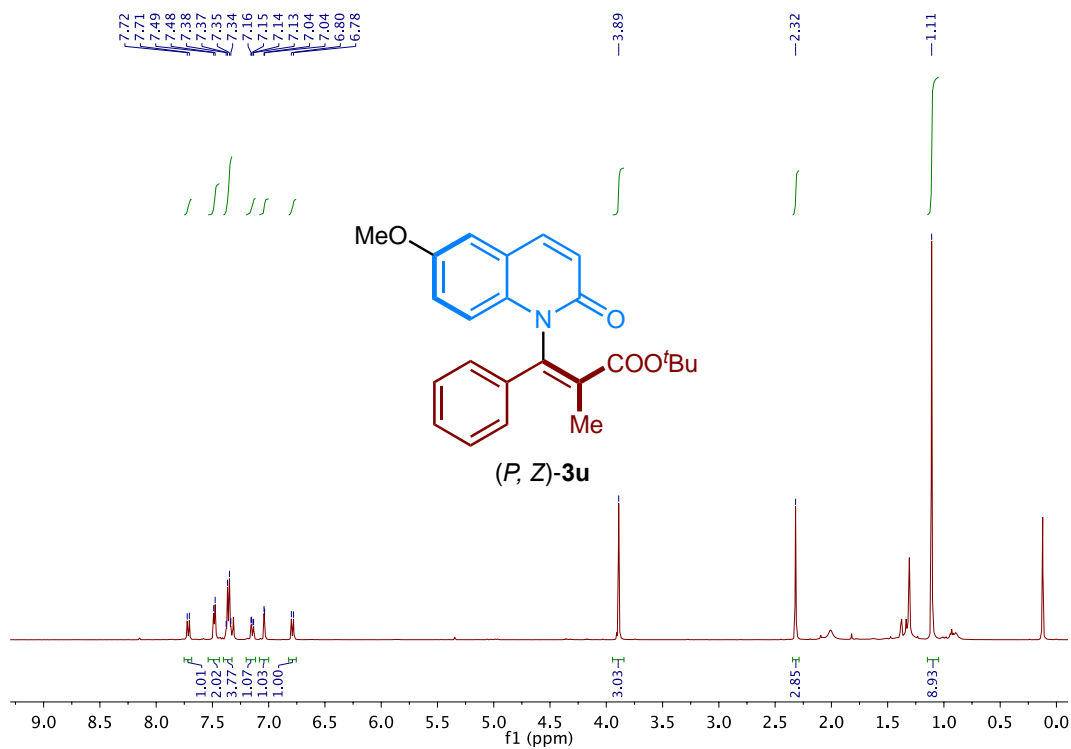

Supplementary Fig. 97. <sup>1</sup>H NMR spectrum of (P, Z)-3u

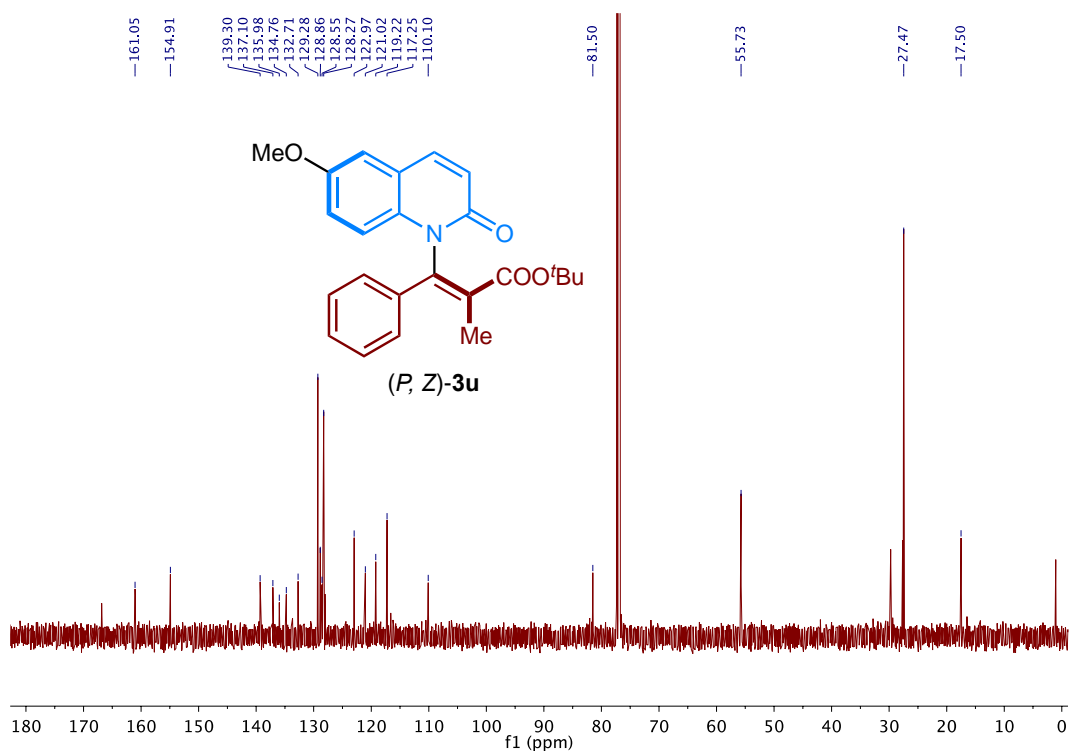

Supplementary Fig. 98. <sup>13</sup>C NMR spectrum of (P, Z)-3u

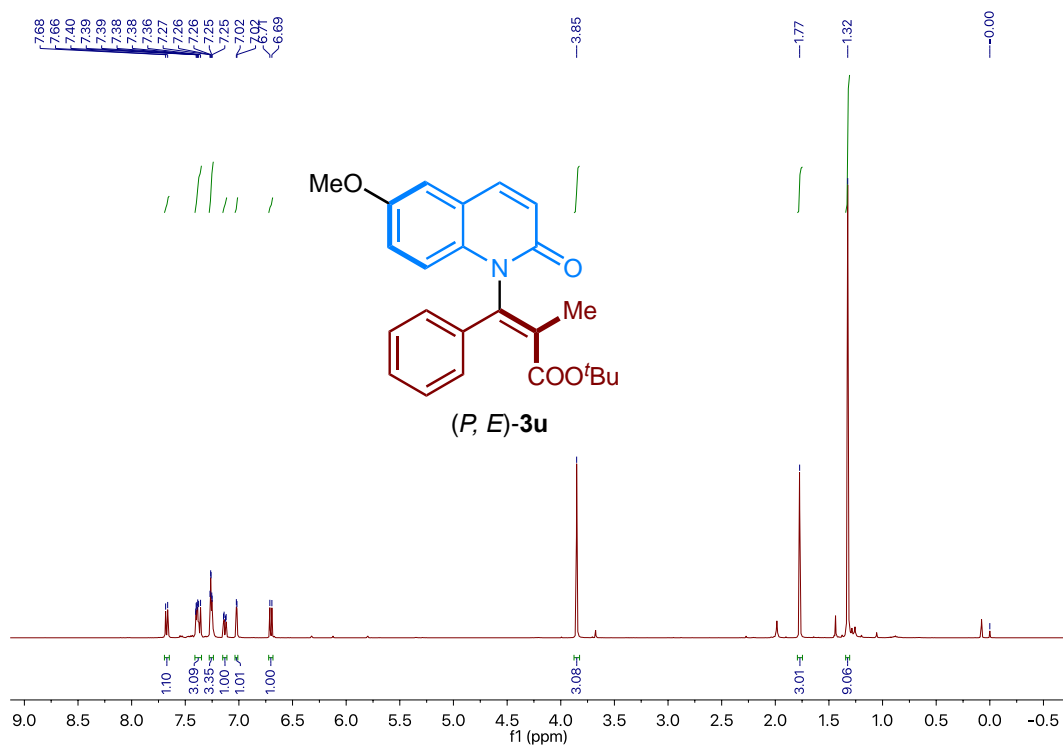

**Supplementary Fig. 99. <sup>1</sup>H NMR spectrum of *(P, E)*-3u**

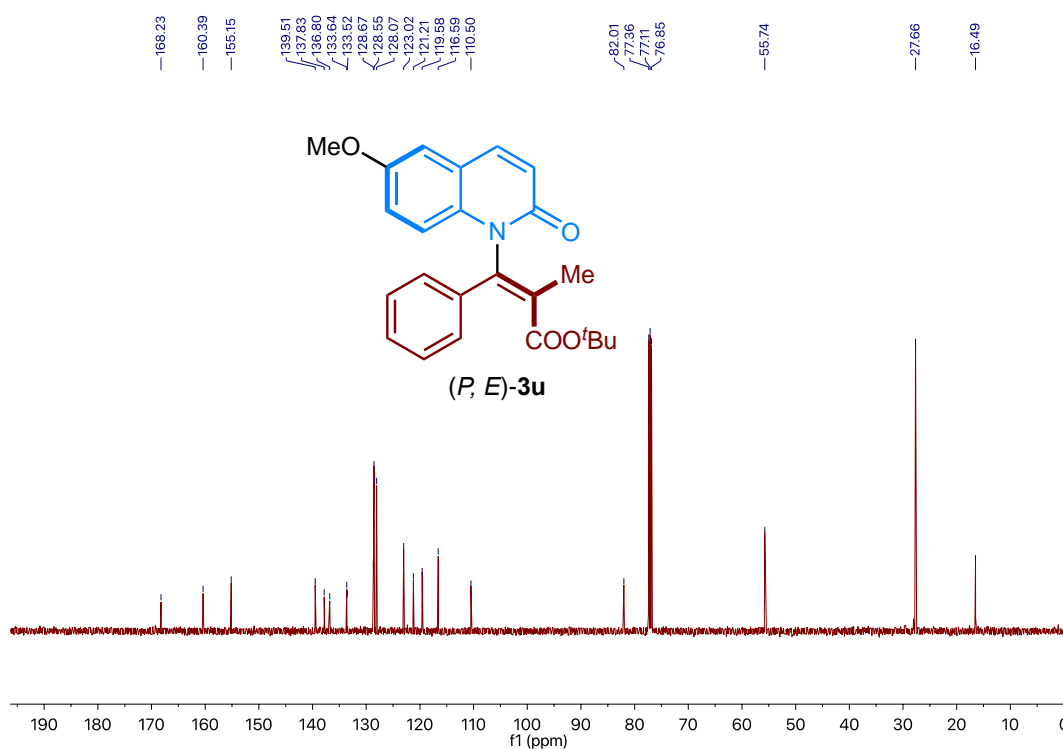

**Supplementary Fig. 100. <sup>13</sup>C NMR spectrum of *(P, E)*-3u**

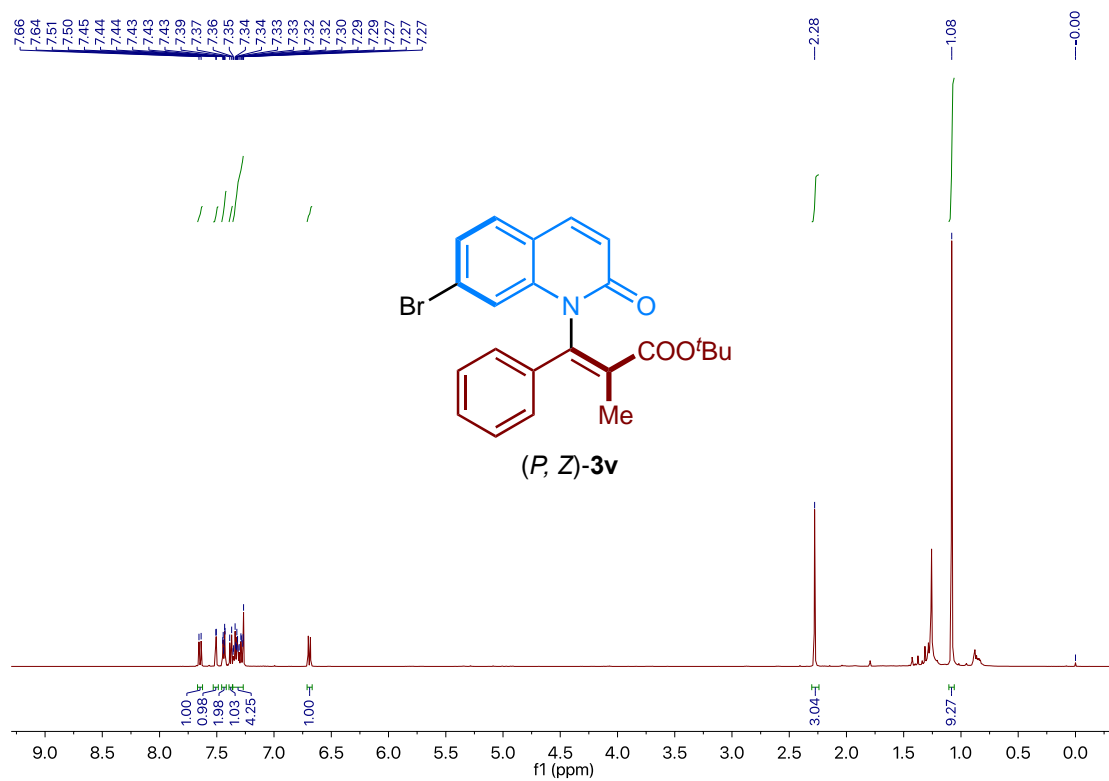

Supplementary Fig. 101. <sup>1</sup>H NMR spectrum of (*P, Z*)-**3v**

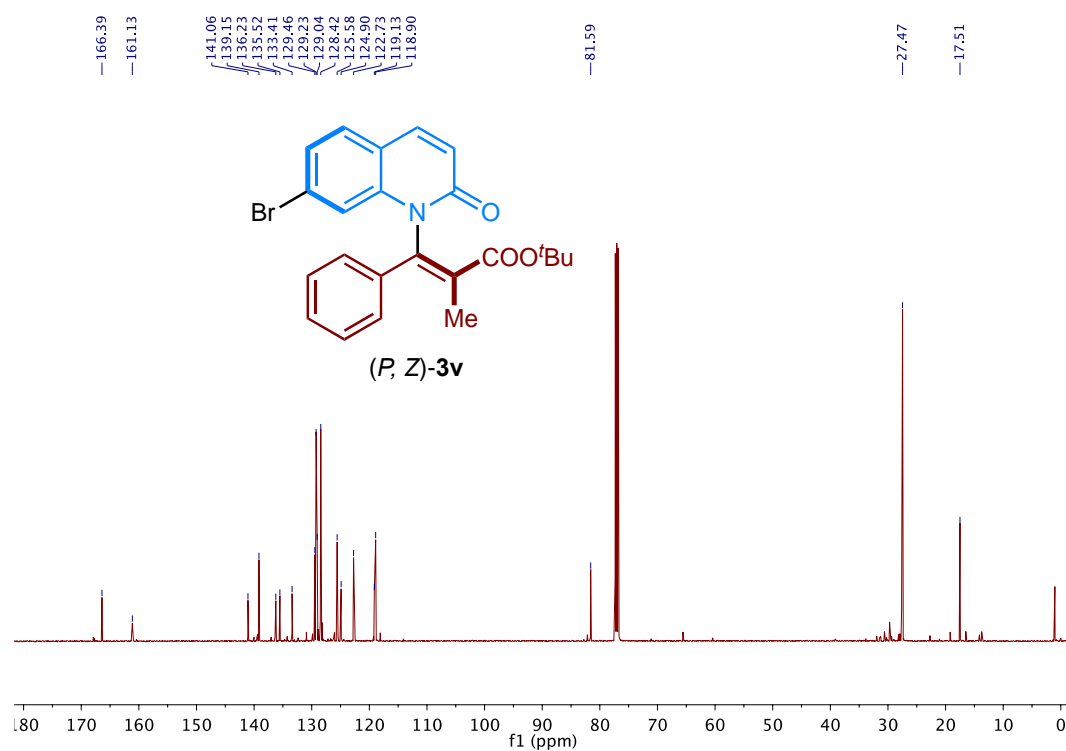

Supplementary Fig. 102. <sup>13</sup>C NMR spectrum of (*P, Z*)-**3v**



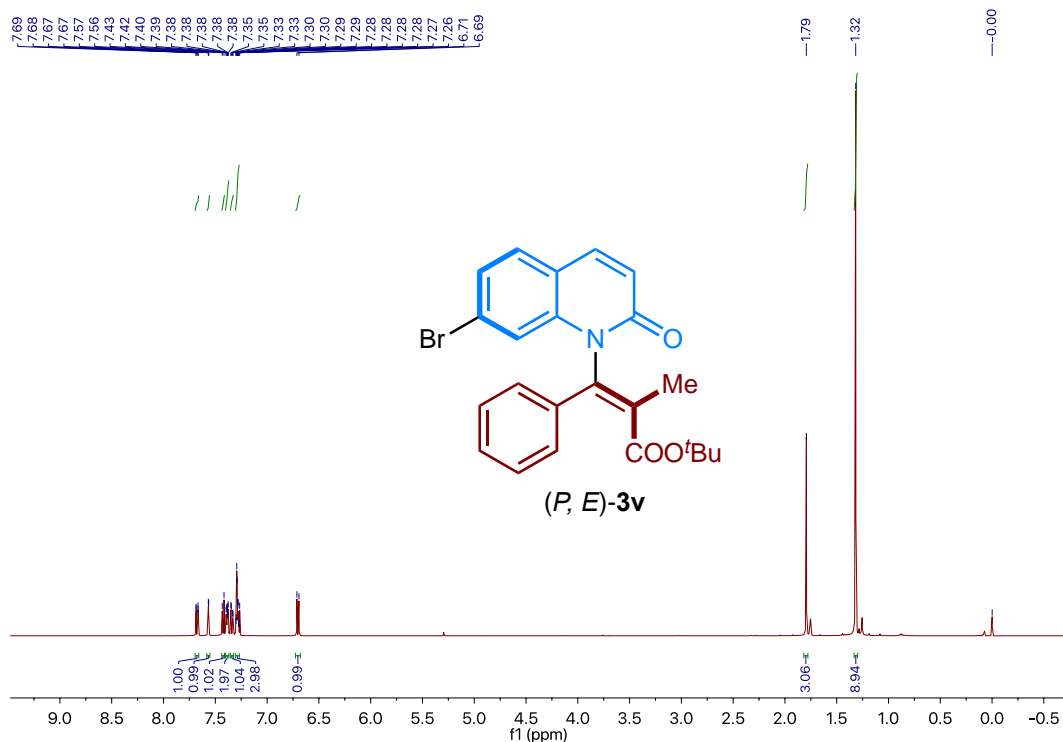

Supplementary Fig. 103. <sup>1</sup>H NMR spectrum of (*P, E*)-**3v**

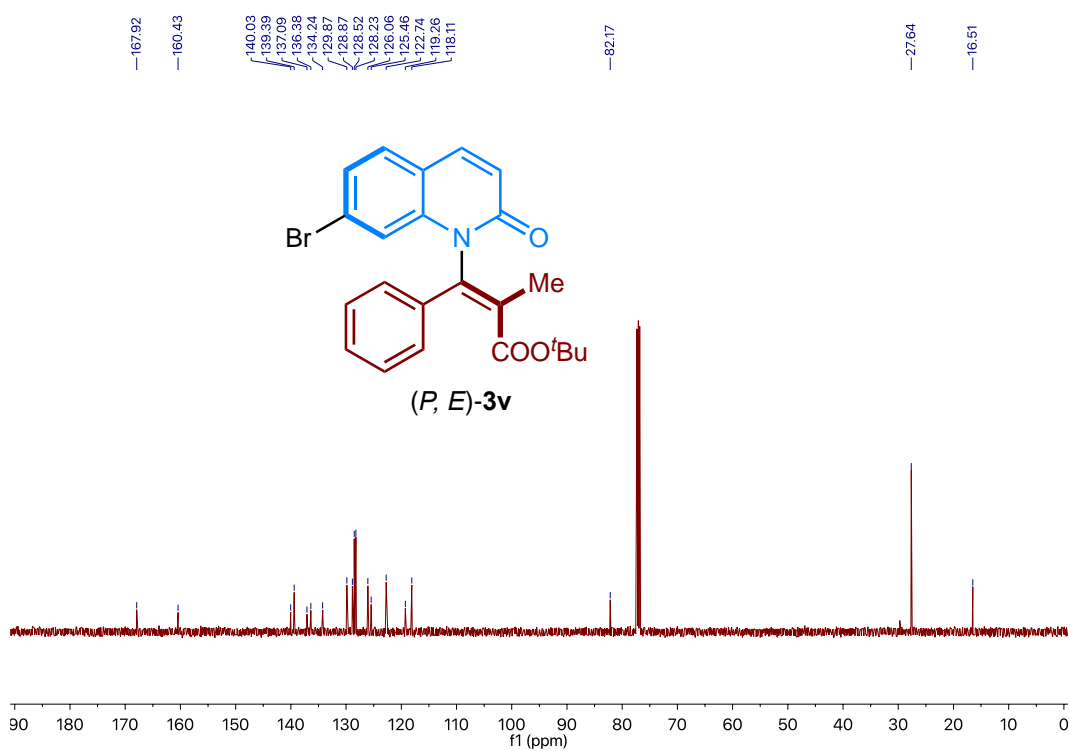

Supplementary Fig. 104. <sup>13</sup>C NMR spectrum of (*P, E*)-**3v**

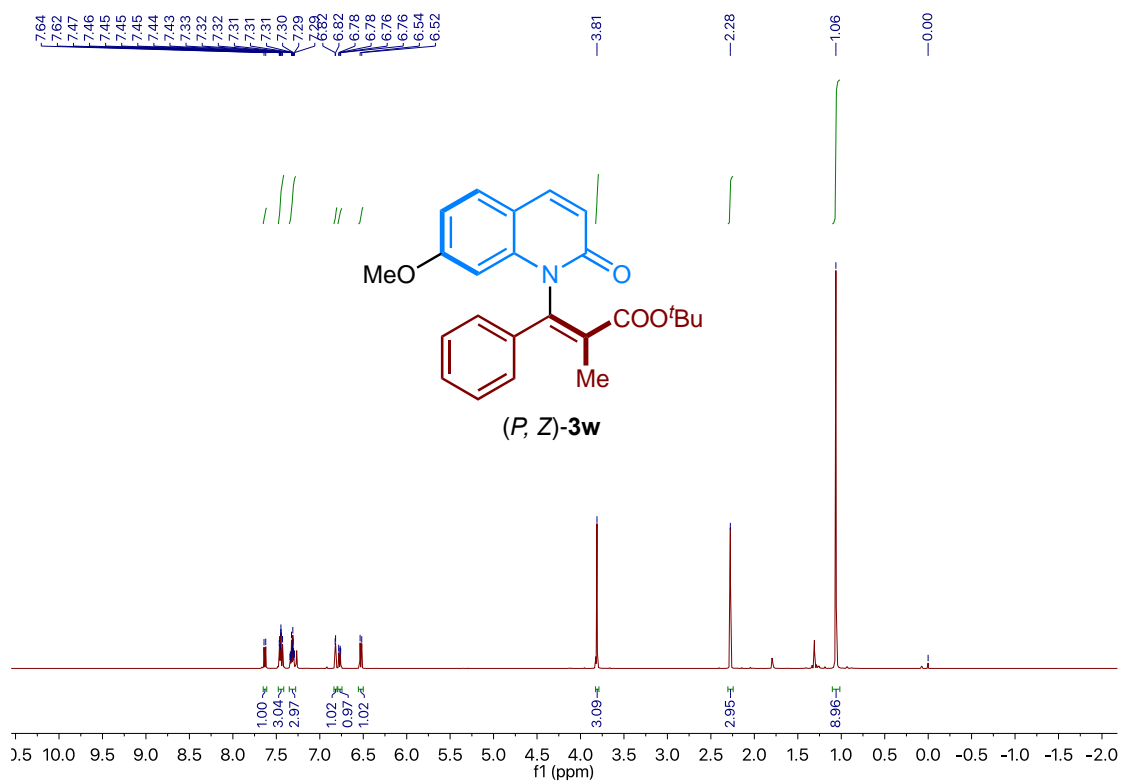

**Supplementary Fig. 105.  $^1\text{H}$  NMR spectrum of (P, Z)-3w**

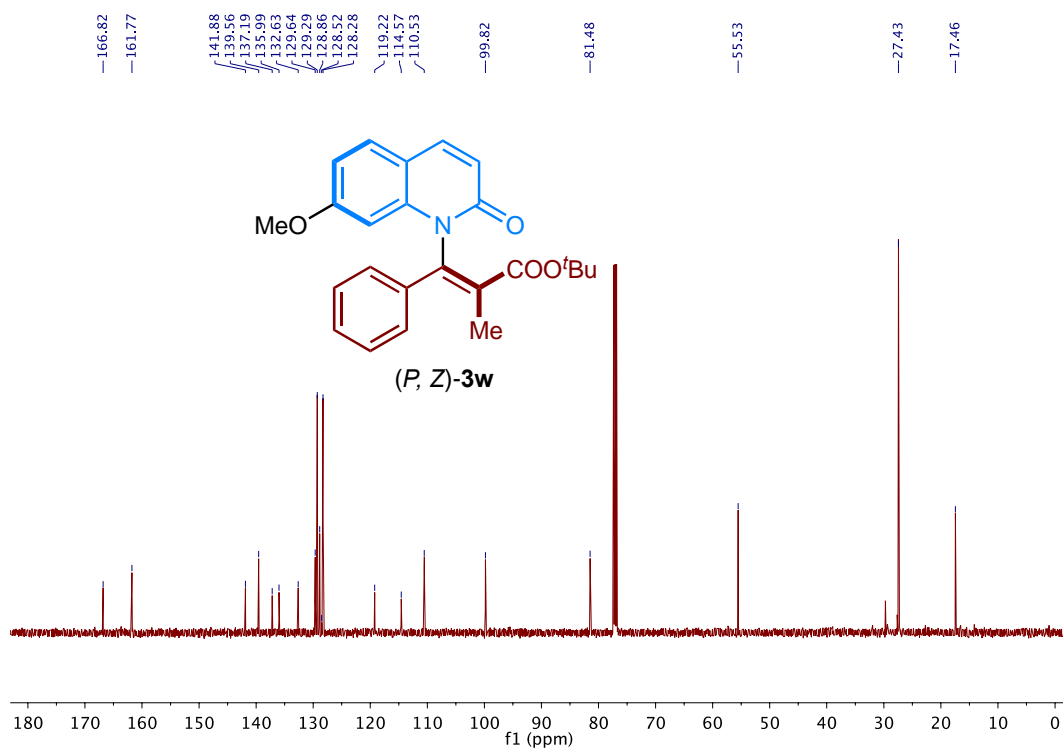

**Supplementary Fig. 106.  $^{13}\text{C}$  NMR spectrum of (P, Z)-3w**

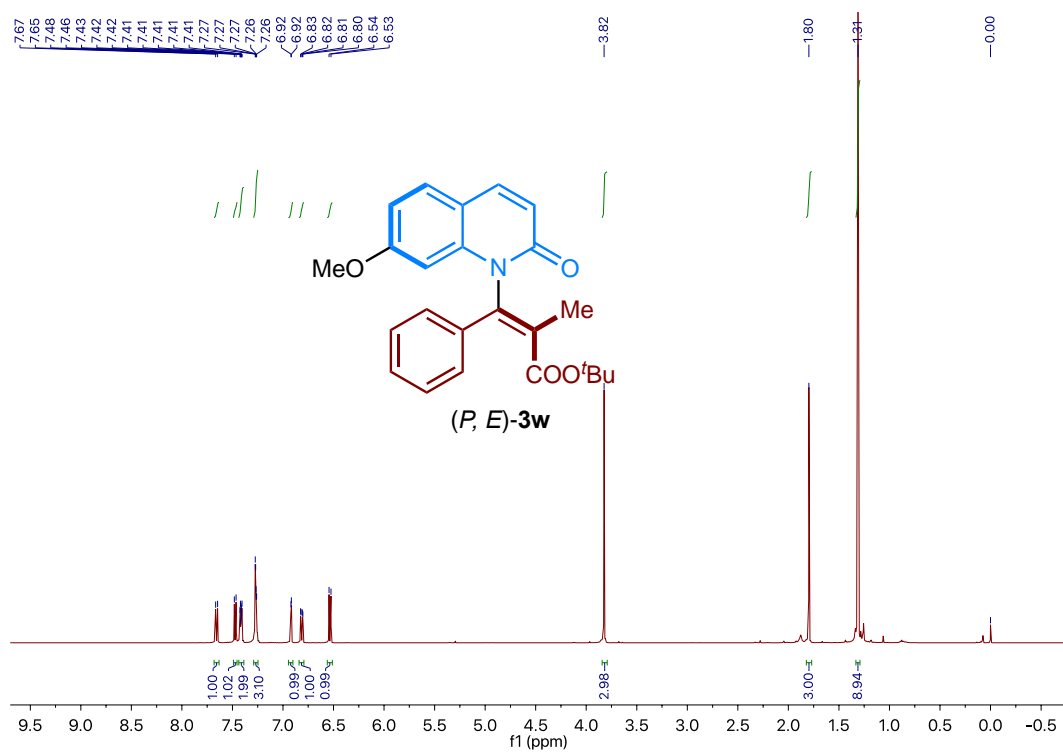

Supplementary Fig. 107. <sup>1</sup>H NMR spectrum of *(P, E)*-3w

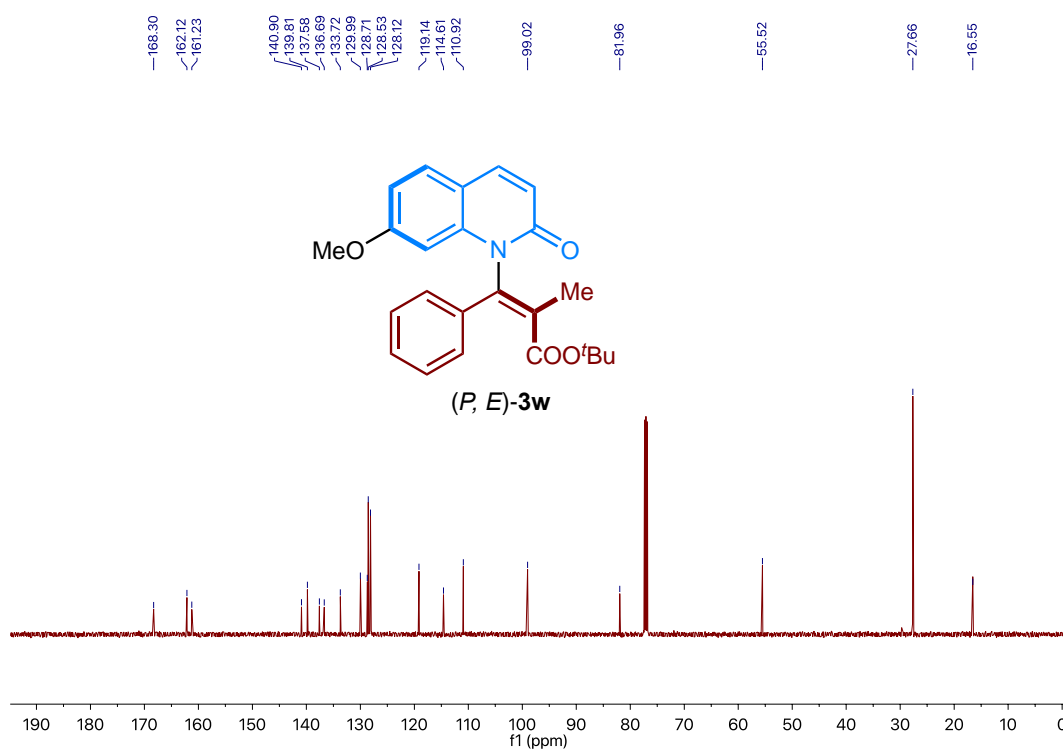

Supplementary Fig. 108. <sup>13</sup>C NMR spectrum of *(P, E)*-3w

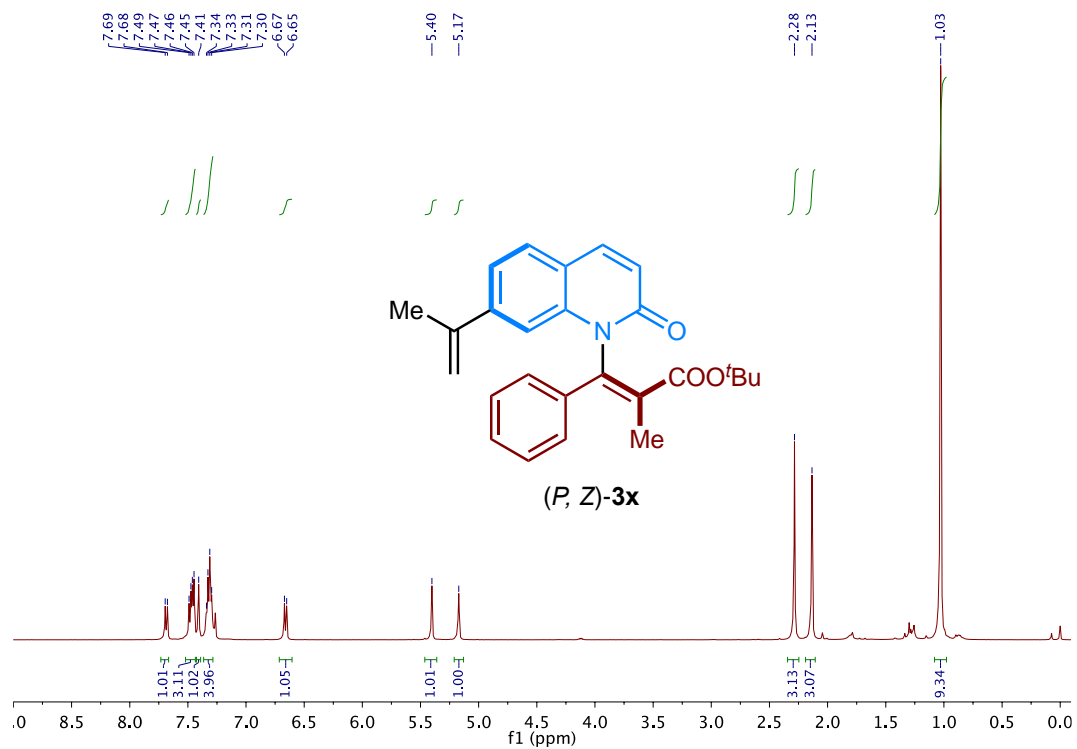

Supplementary Fig. 109. <sup>1</sup>H NMR spectrum of *(P, Z)*-3x

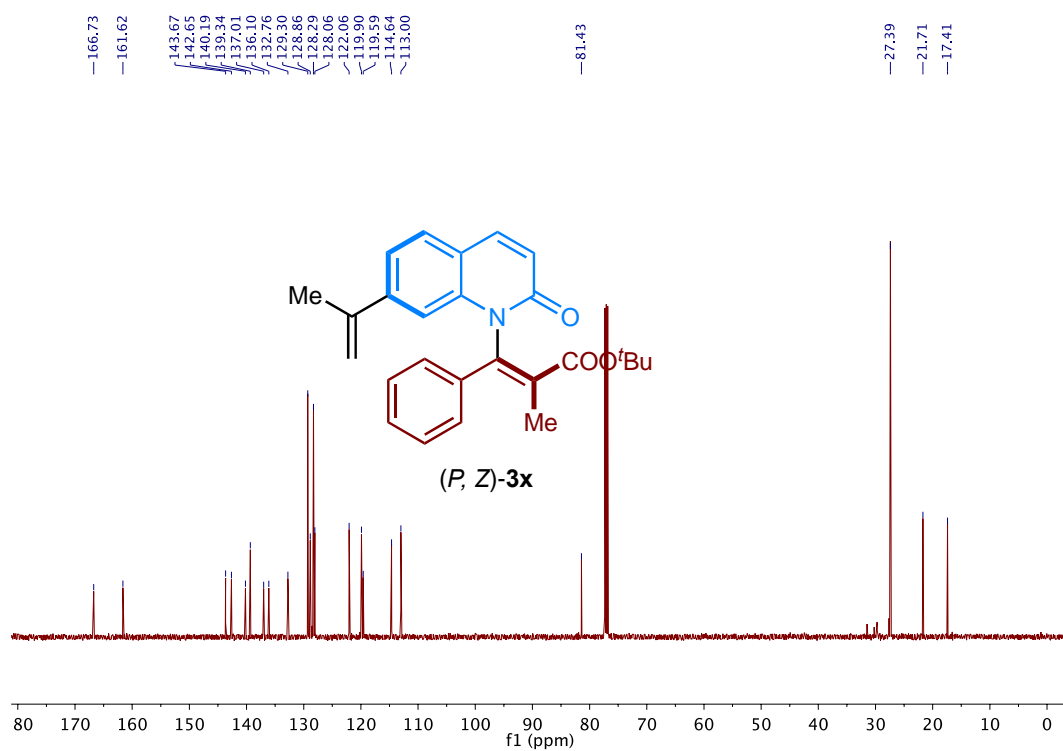

Supplementary Fig. 110. <sup>13</sup>C NMR spectrum of *(P, Z)*-3x

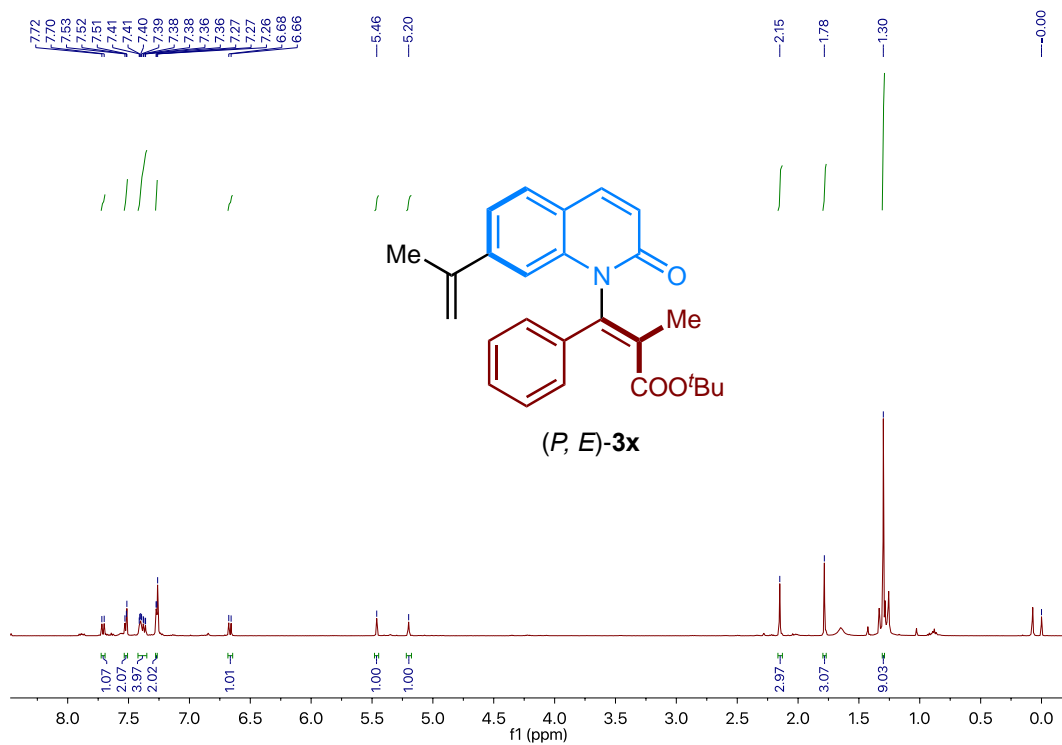

Supplementary Fig. 111. <sup>1</sup>H NMR spectrum of (P, E)-3x

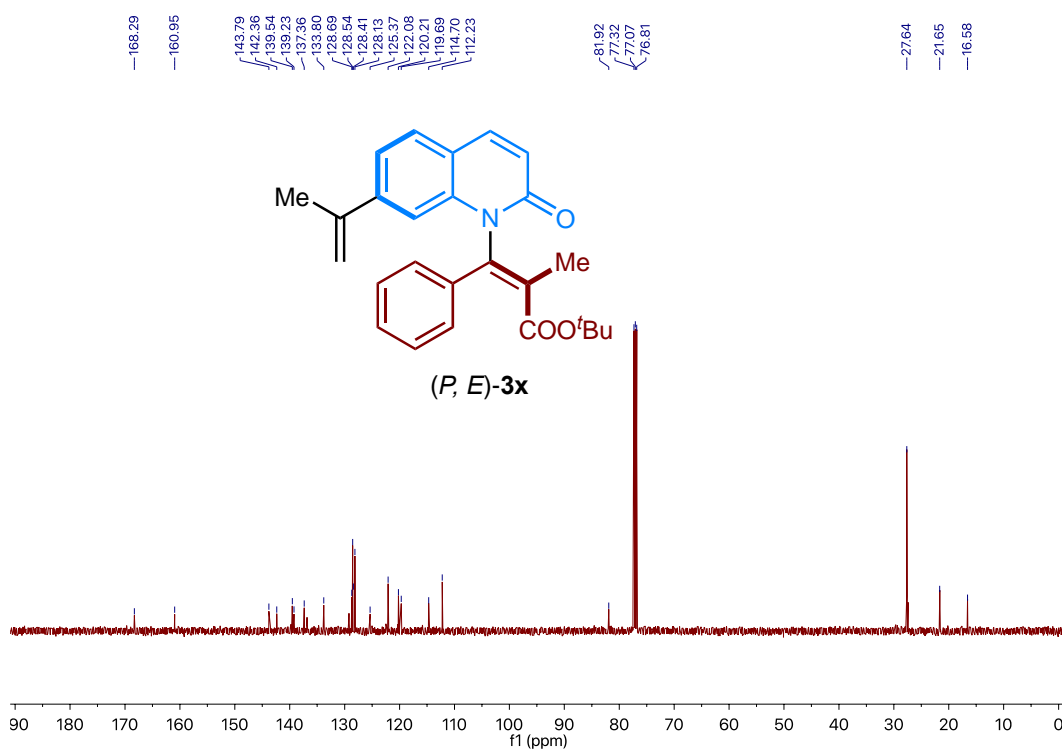

Supplementary Fig. 112. <sup>13</sup>C NMR spectrum of (P, E)-3x

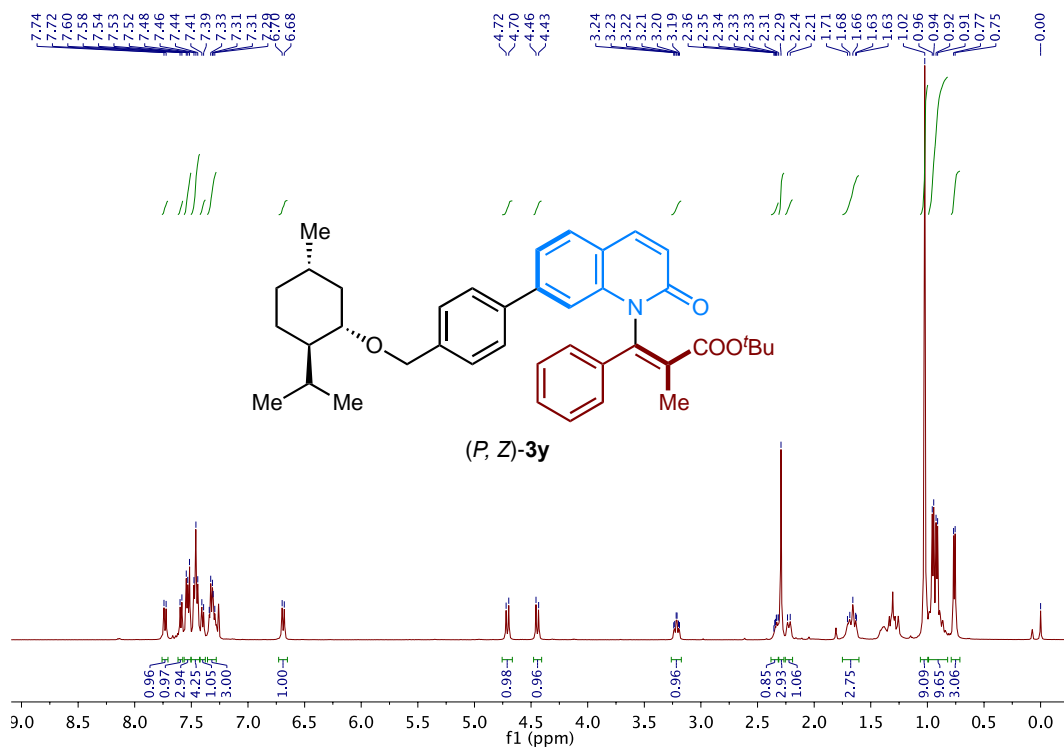

Supplementary Fig. 113. <sup>1</sup>H NMR spectrum of (P, Z)-3y

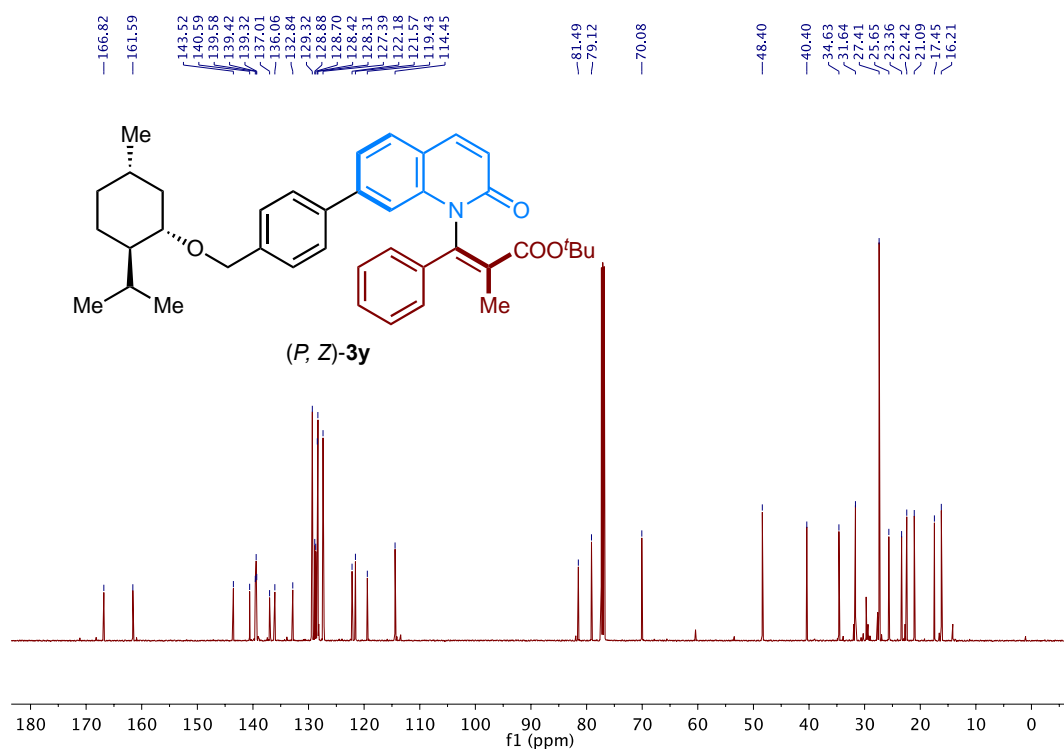

Supplementary Fig. 114. <sup>13</sup>C NMR spectrum of (P, Z)-3y

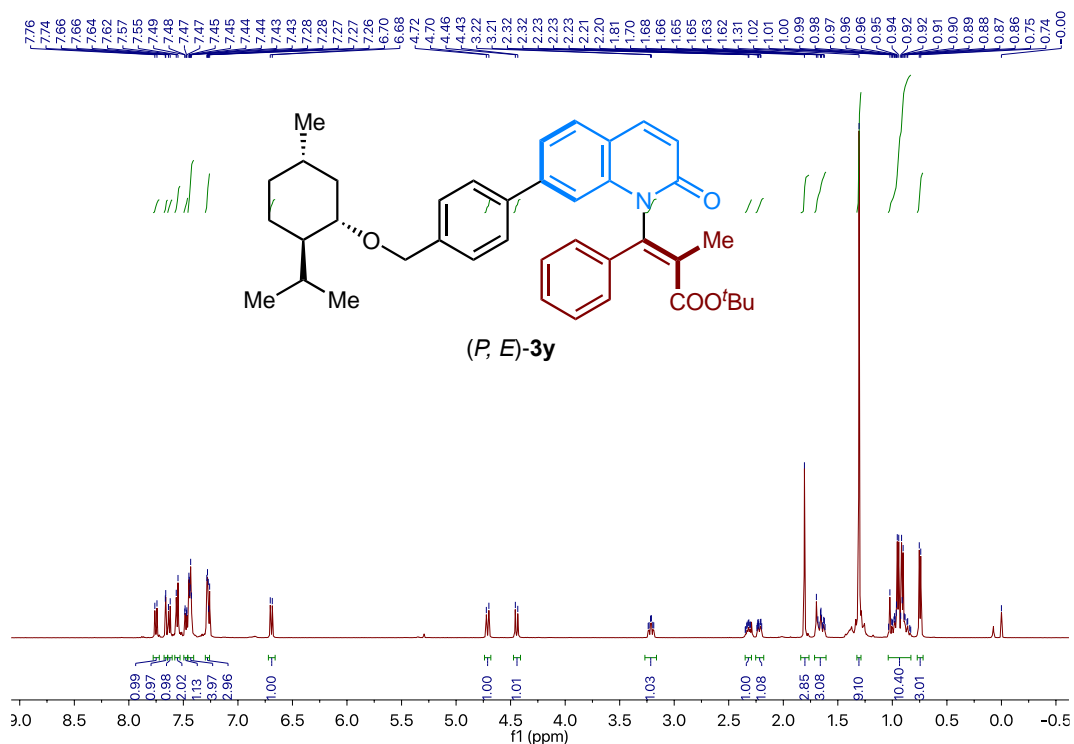

Supplementary Fig. 115. <sup>1</sup>H NMR spectrum of (P, E)-3y

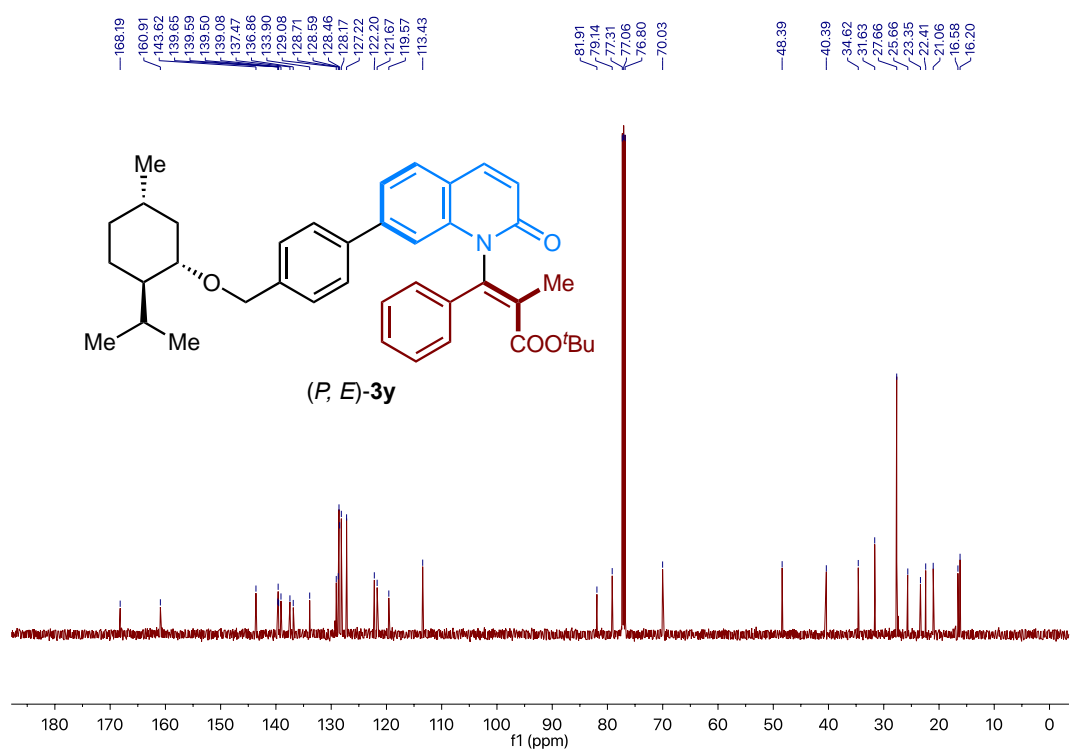

Supplementary Fig. 116. <sup>13</sup>C NMR spectrum of (P, E)-3y

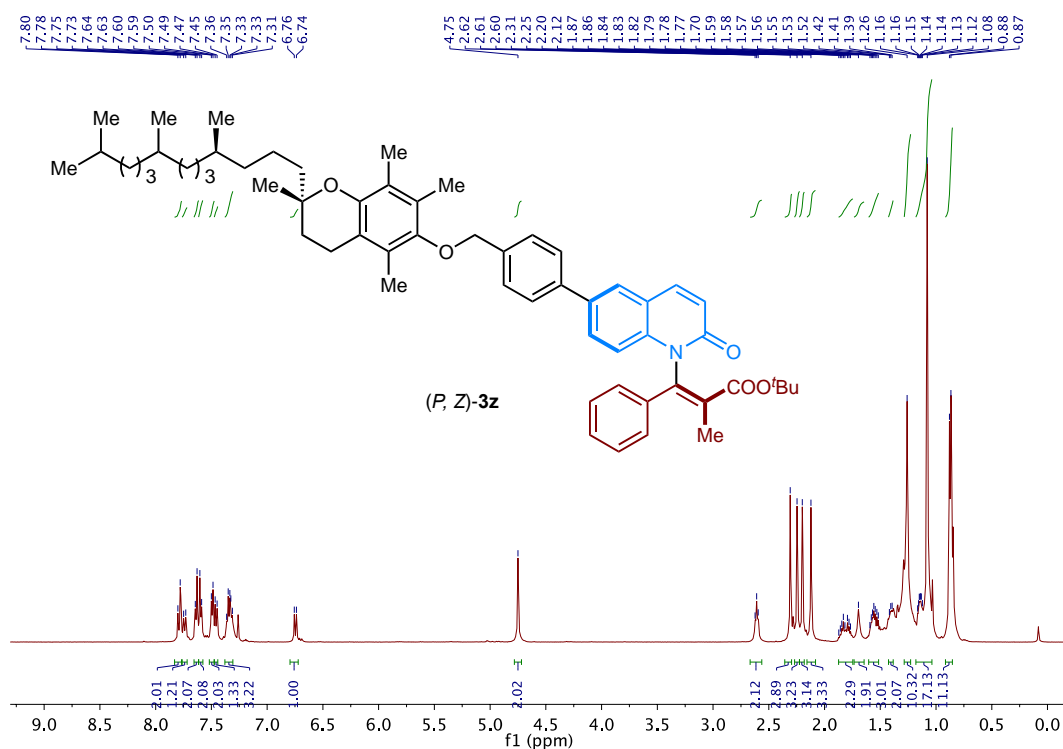

Supplementary Fig. 117. <sup>1</sup>H NMR spectrum of *(P, Z)*-3z

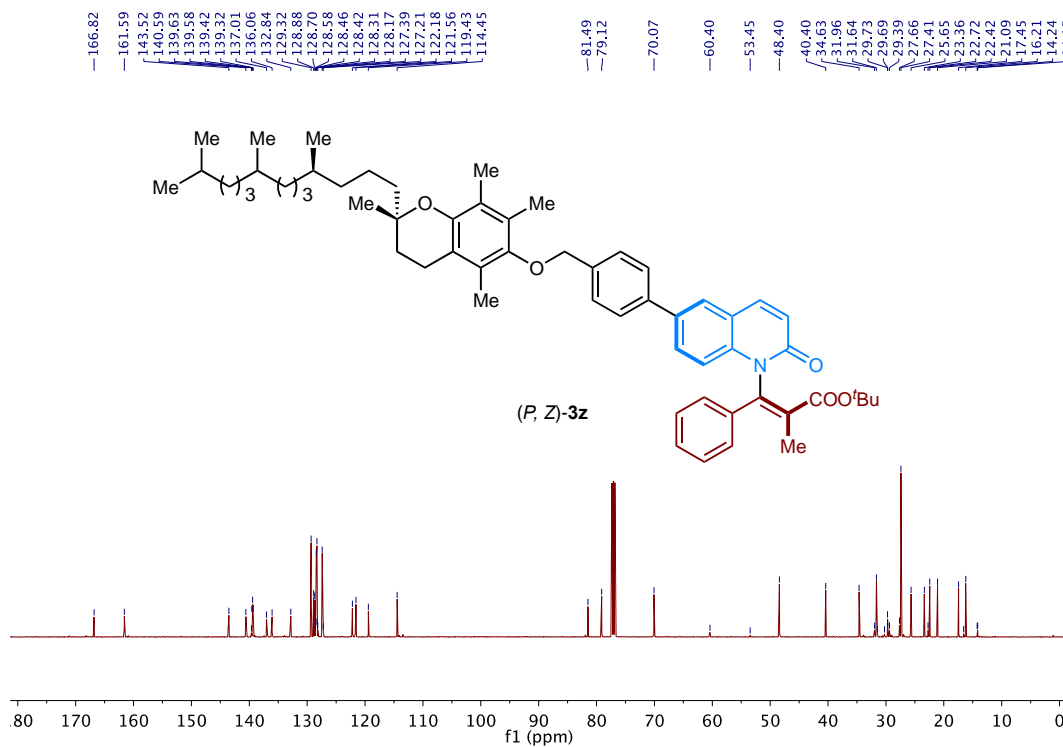

Supplementary Fig. 118. <sup>13</sup>C NMR spectrum of *(P, Z)*-3z



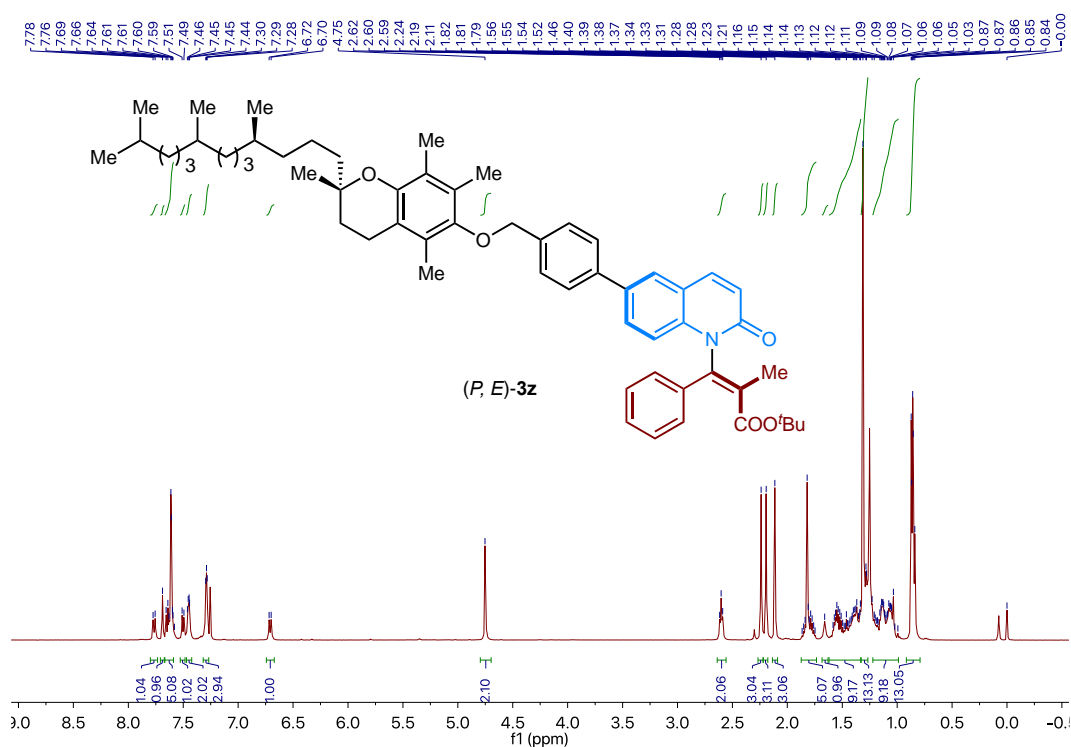

Supplementary Fig. 119. <sup>1</sup>H NMR spectrum of (P, E)-3z

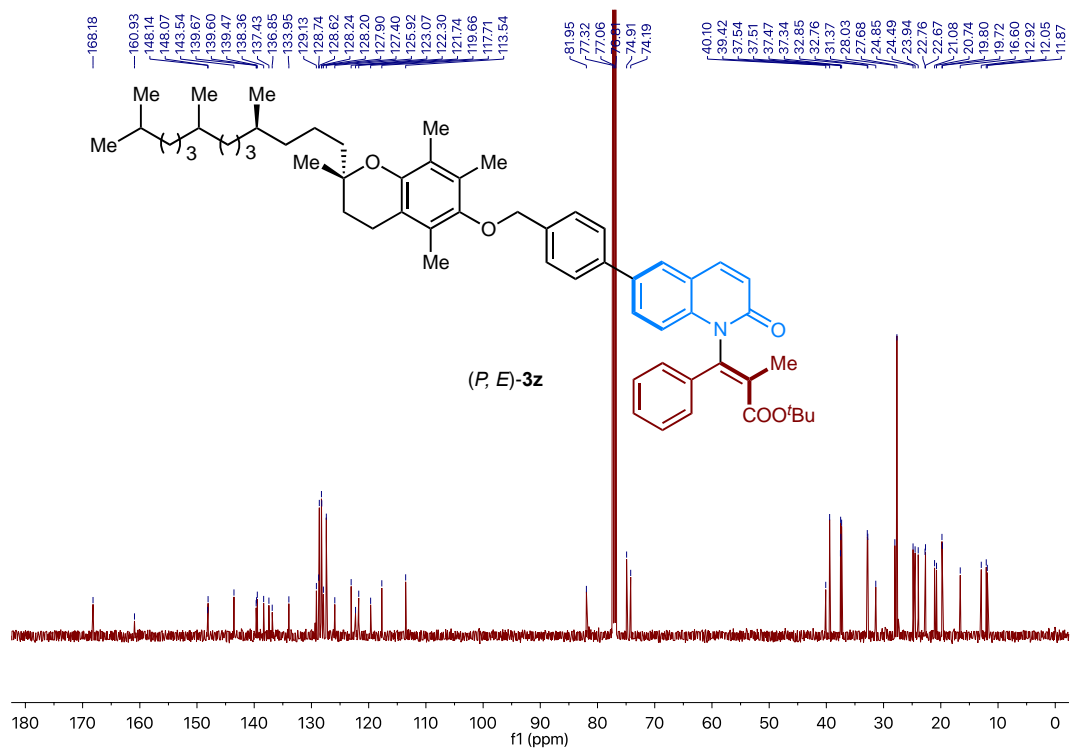

Supplementary Fig. 120. <sup>13</sup>C NMR spectrum of (P, E)-3z

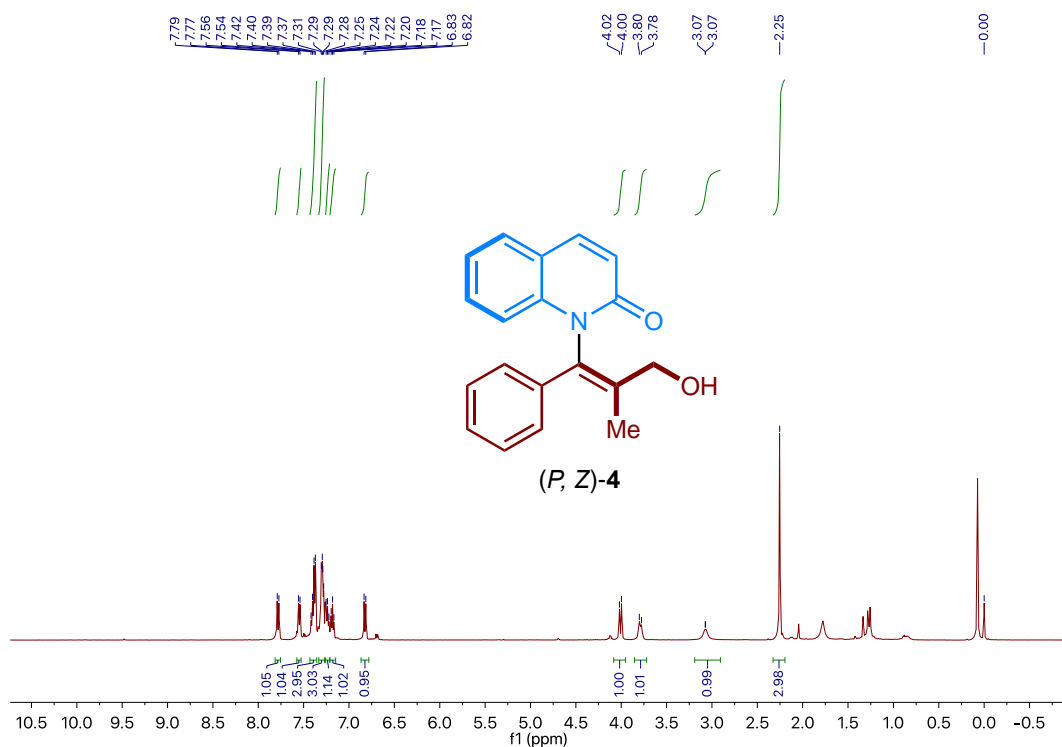

Supplementary Fig. 121. <sup>1</sup>H NMR spectrum of (P, Z)-4

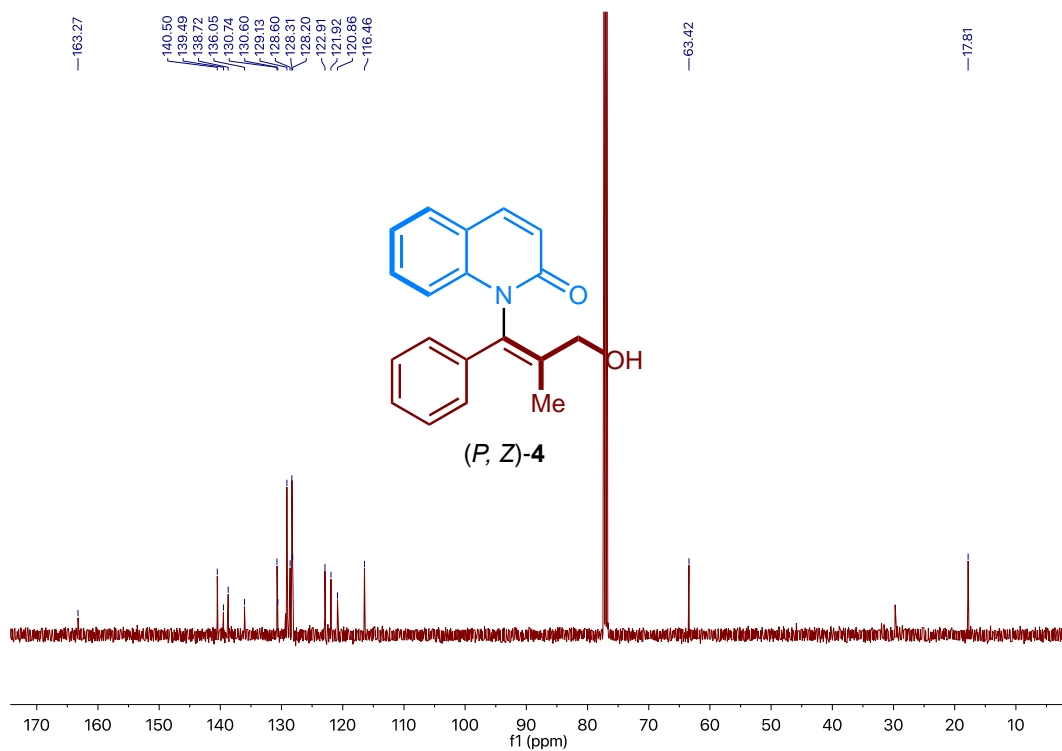

Supplementary Fig. 122. <sup>13</sup>C NMR spectrum of (P, Z)-4

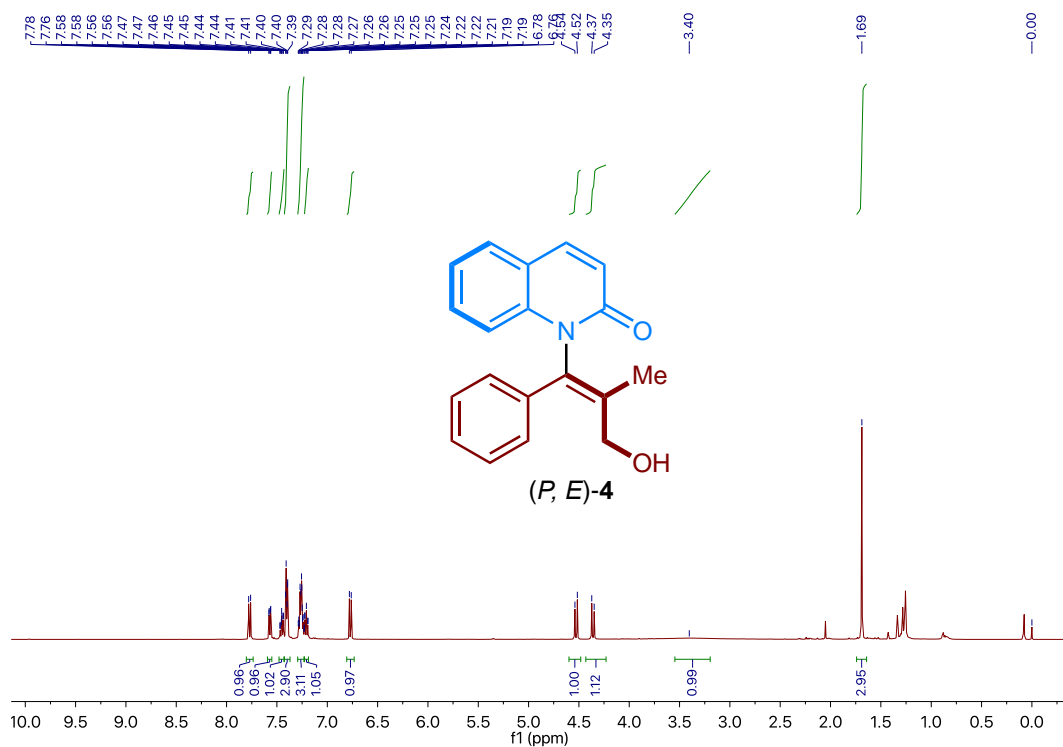

Supplementary Fig. 123.  $^1\text{H}$  NMR spectrum of *(P, E)*-4

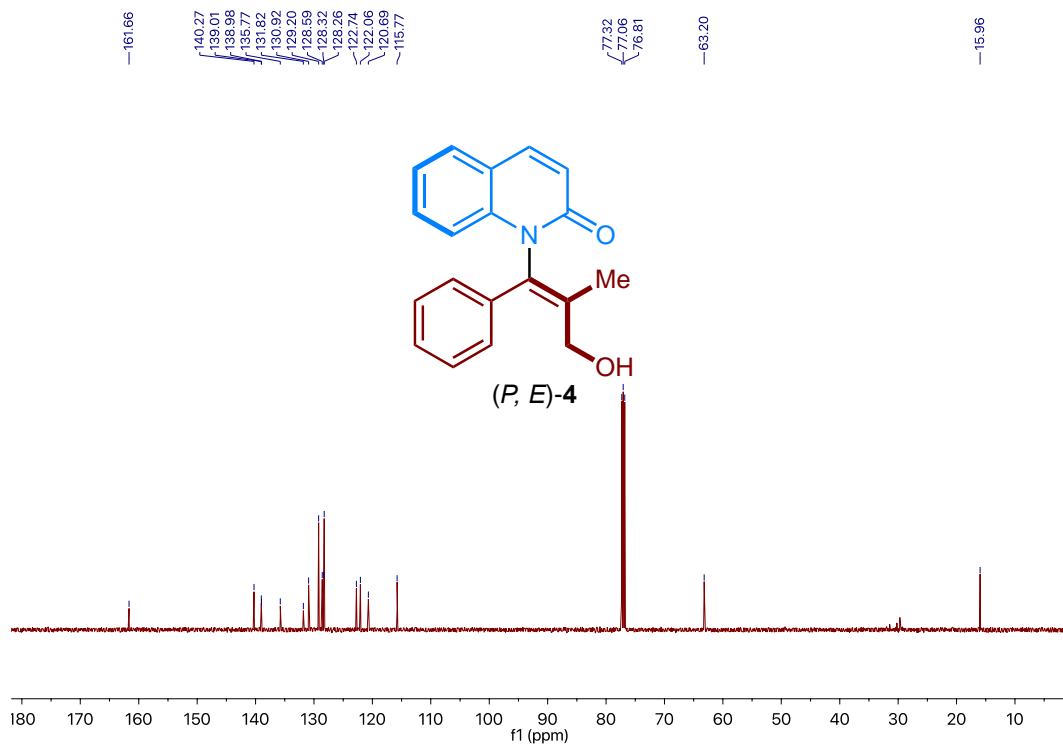

Supplementary Fig. 124.  $^{13}\text{C}$  NMR spectrum of *(P, E)*-4

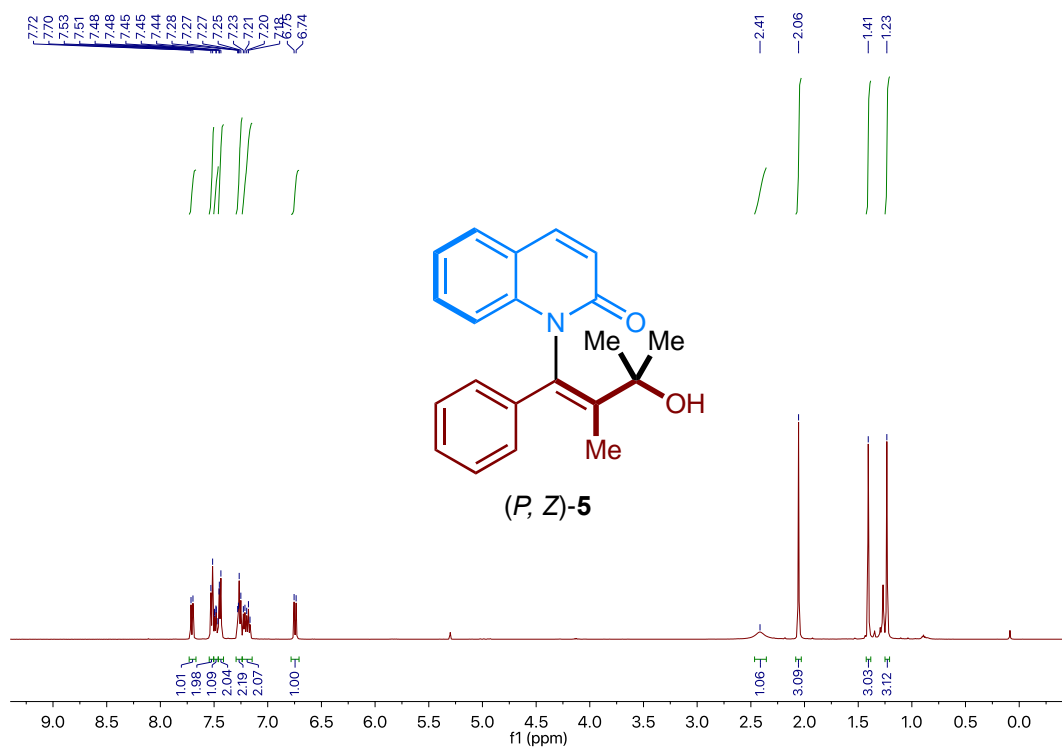

Supplementary Fig. 125. <sup>1</sup>H NMR spectrum of (P, Z)-5

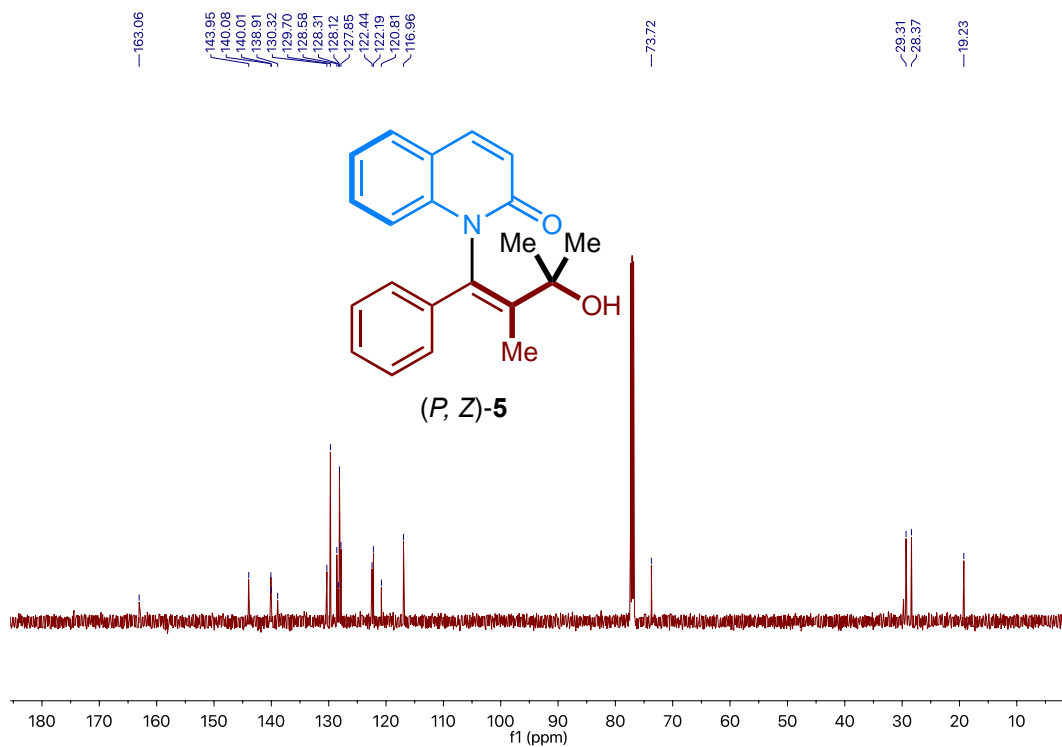

Supplementary Fig. 126. <sup>13</sup>C NMR spectrum of (P, Z)-5

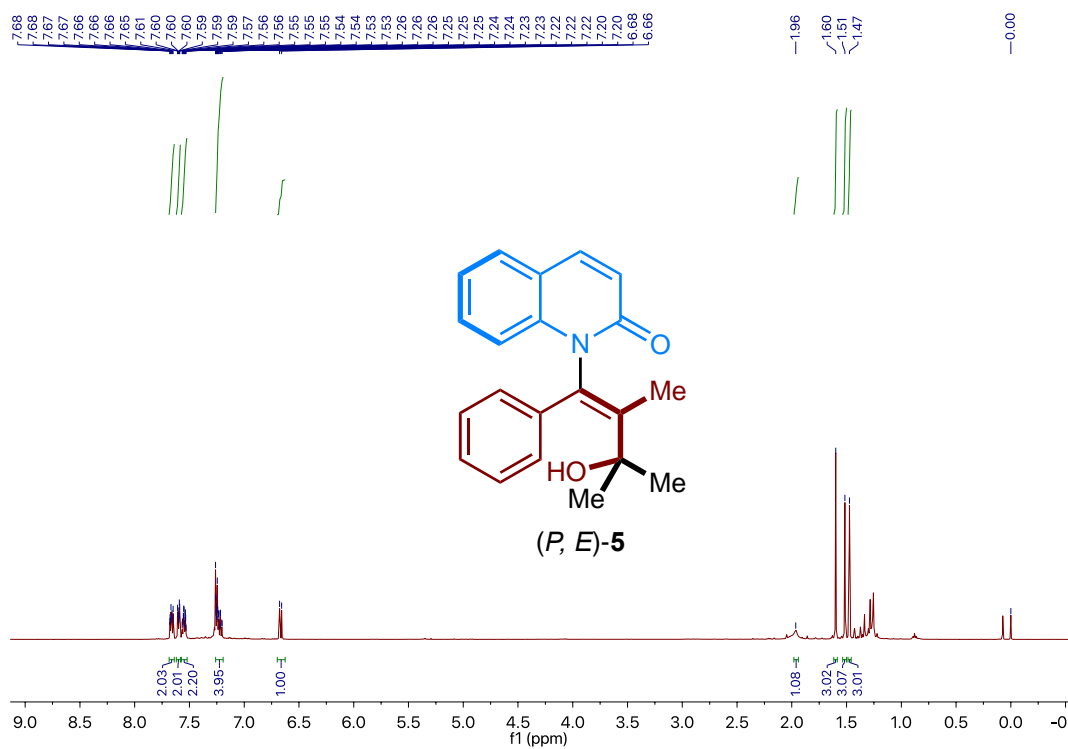

Supplementary Fig. 127.  $^1\text{H}$  NMR spectrum of (P, E)-5

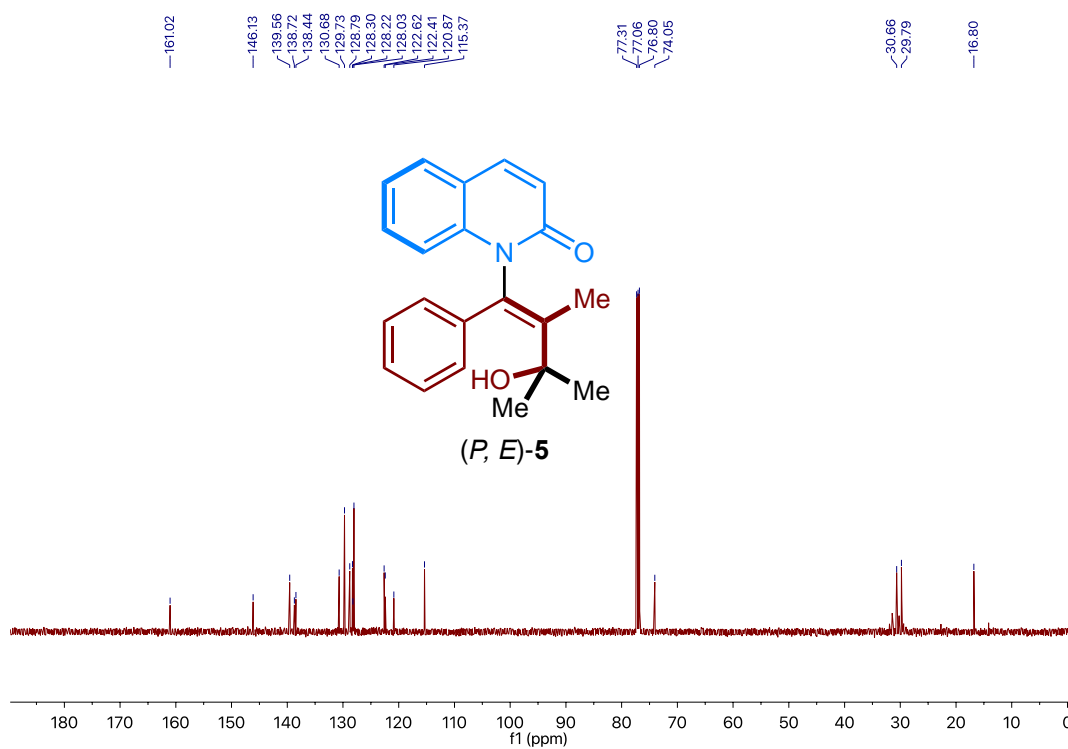

Supplementary Fig. 128.  $^{13}\text{C}$  NMR spectrum of (P, E)-5

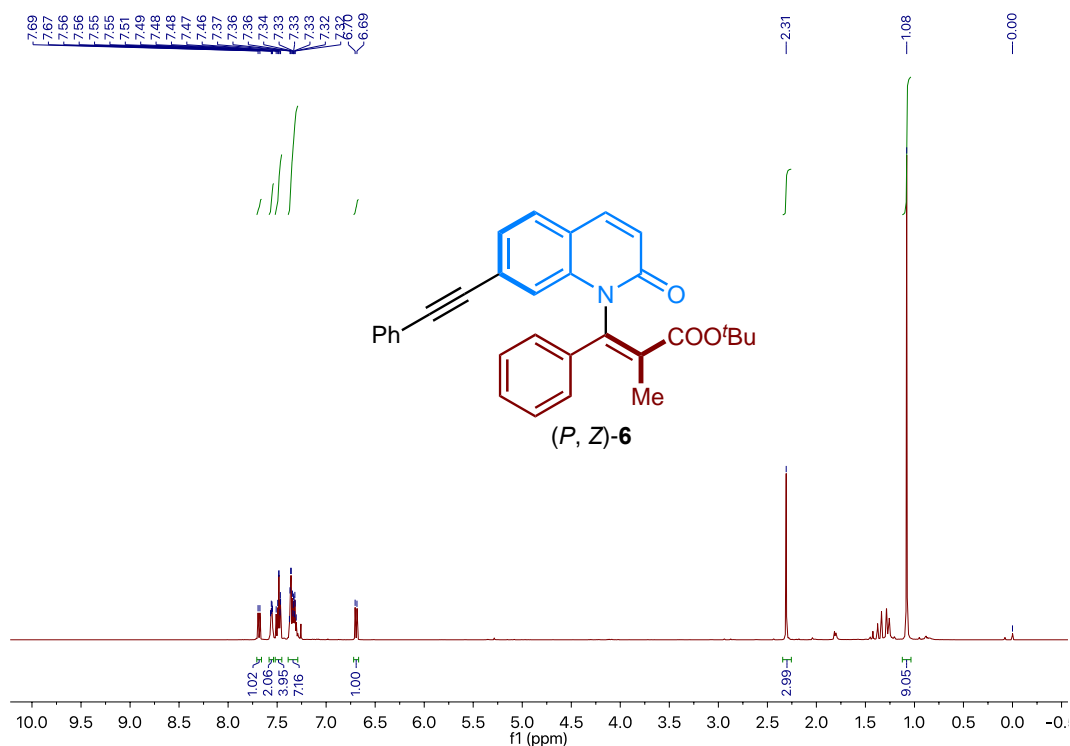

Supplementary Fig. 129. <sup>1</sup>H NMR spectrum of (P, Z)-6

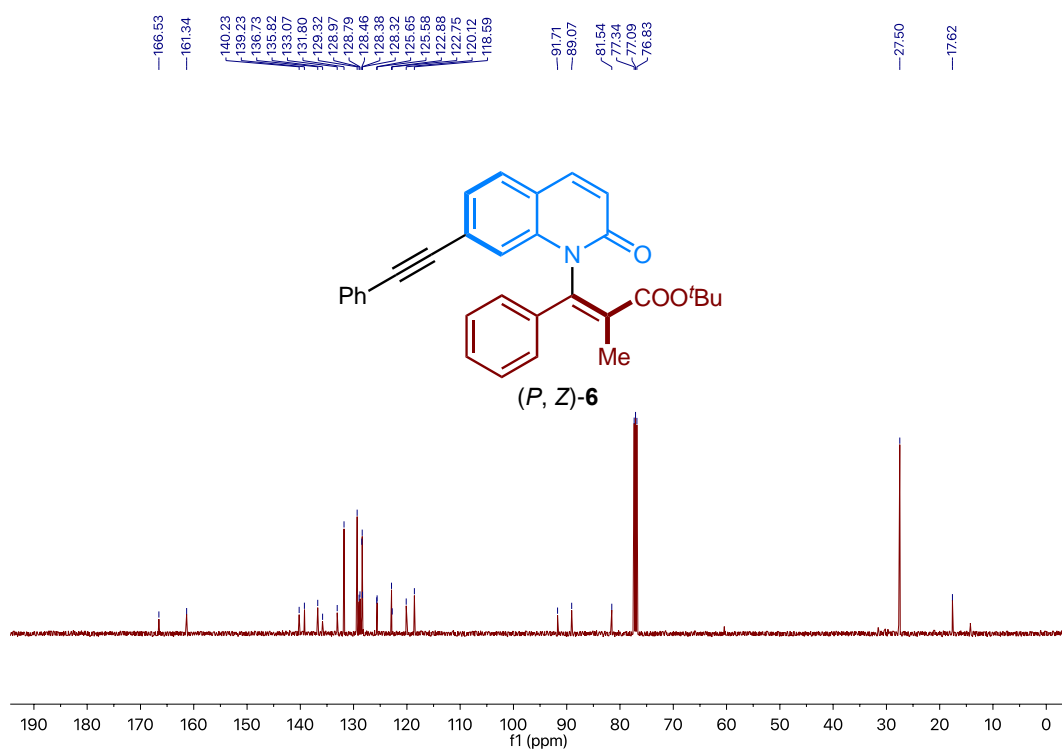

Supplementary Fig. 130. <sup>13</sup>C NMR spectrum of (P, Z)-6

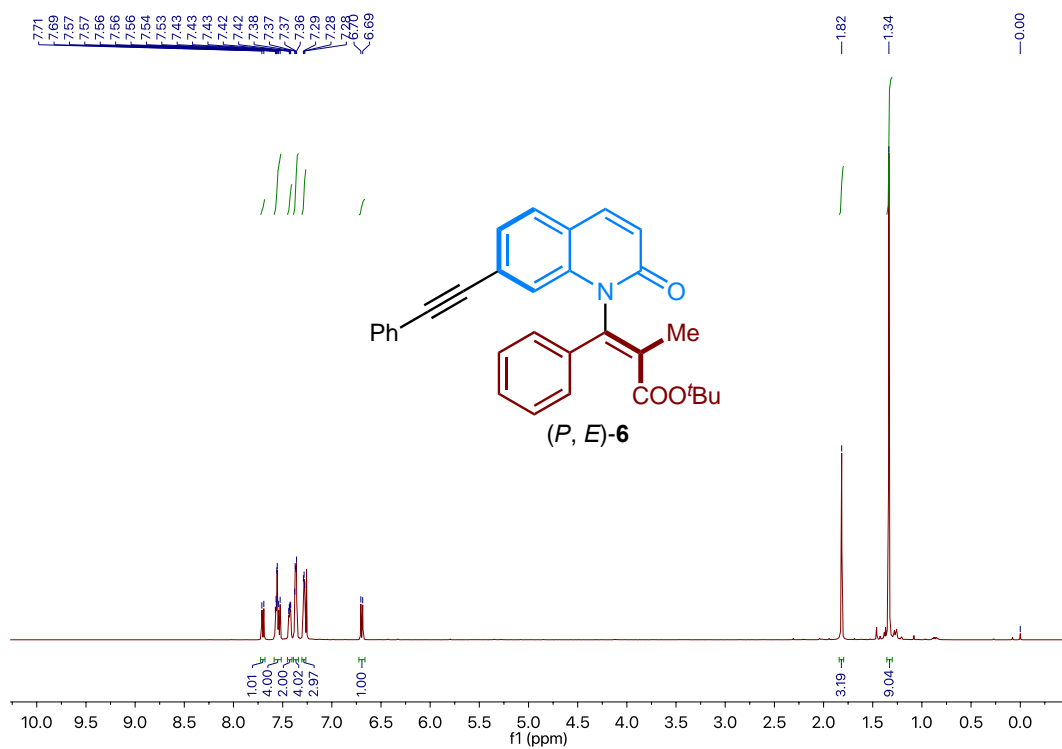

**Supplementary Fig. 131. <sup>1</sup>H NMR spectrum of (P, E)-6**

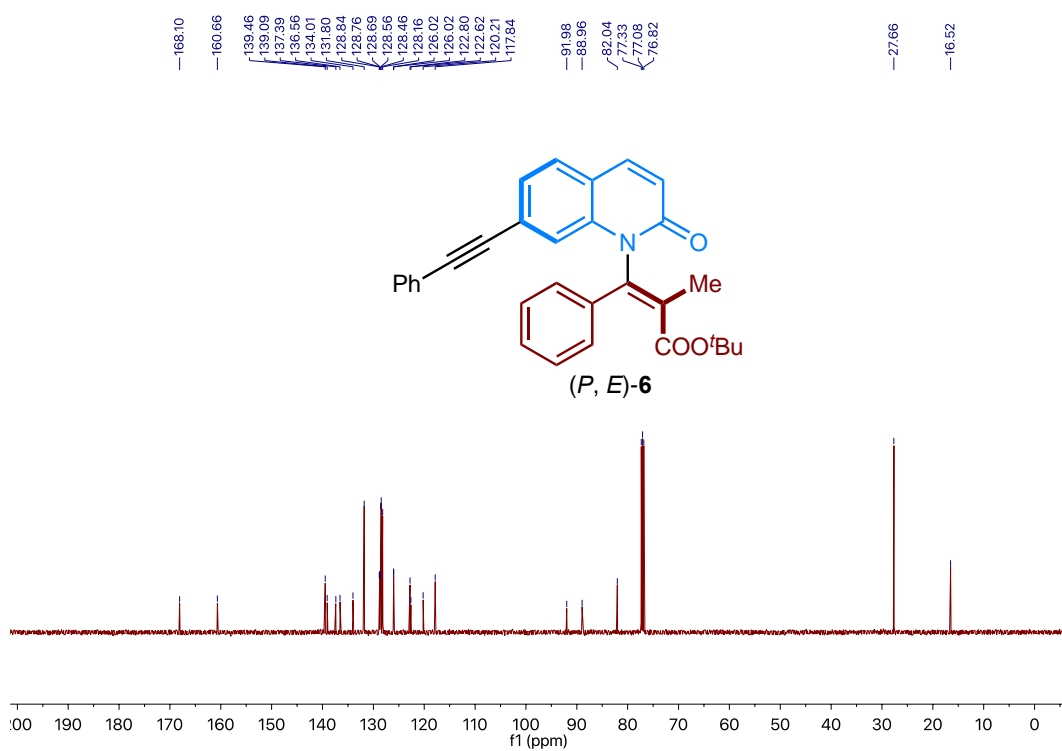

**Supplementary Fig. 132. <sup>13</sup>C NMR spectrum of (P, E)-6**

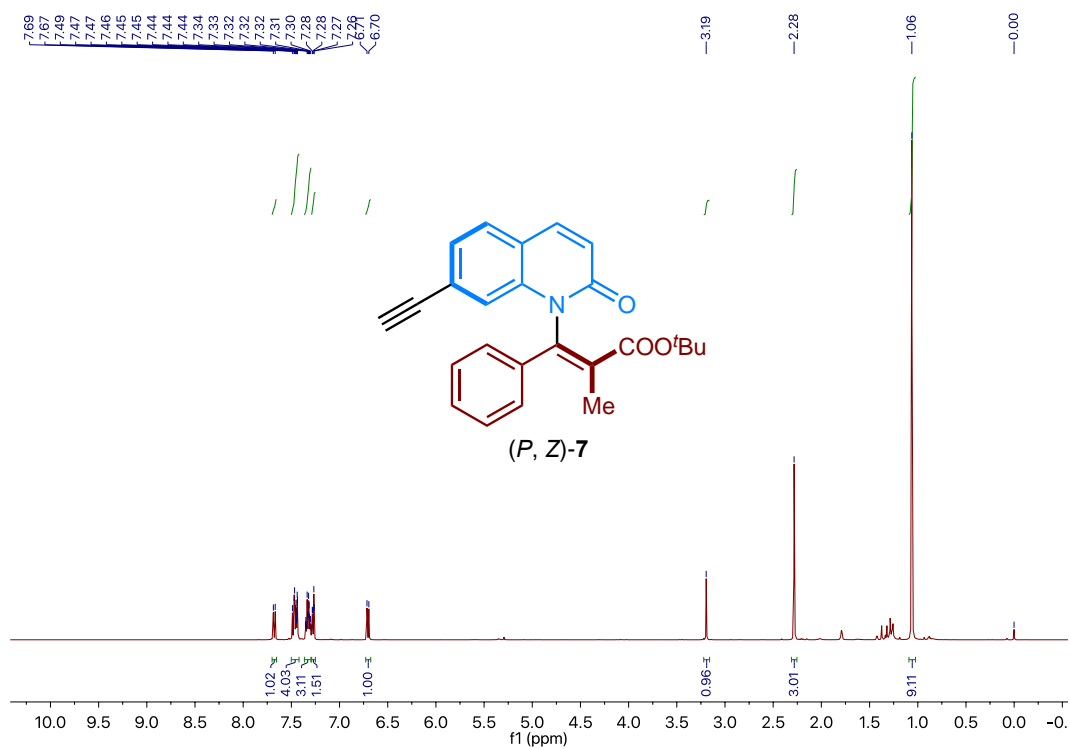

**Supplementary Fig. 133.  $^1\text{H}$  NMR spectrum of (P, Z)-7**

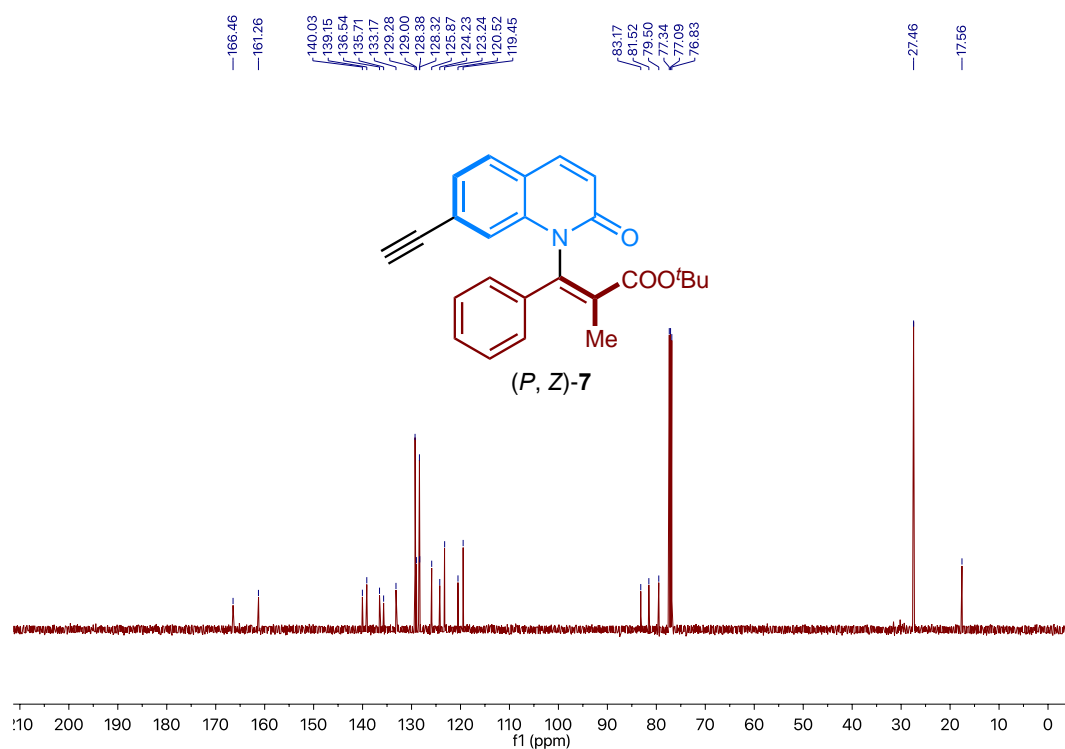

**Supplementary Fig. 134.  $^{13}\text{C}$  NMR spectrum of (P, Z)-7**



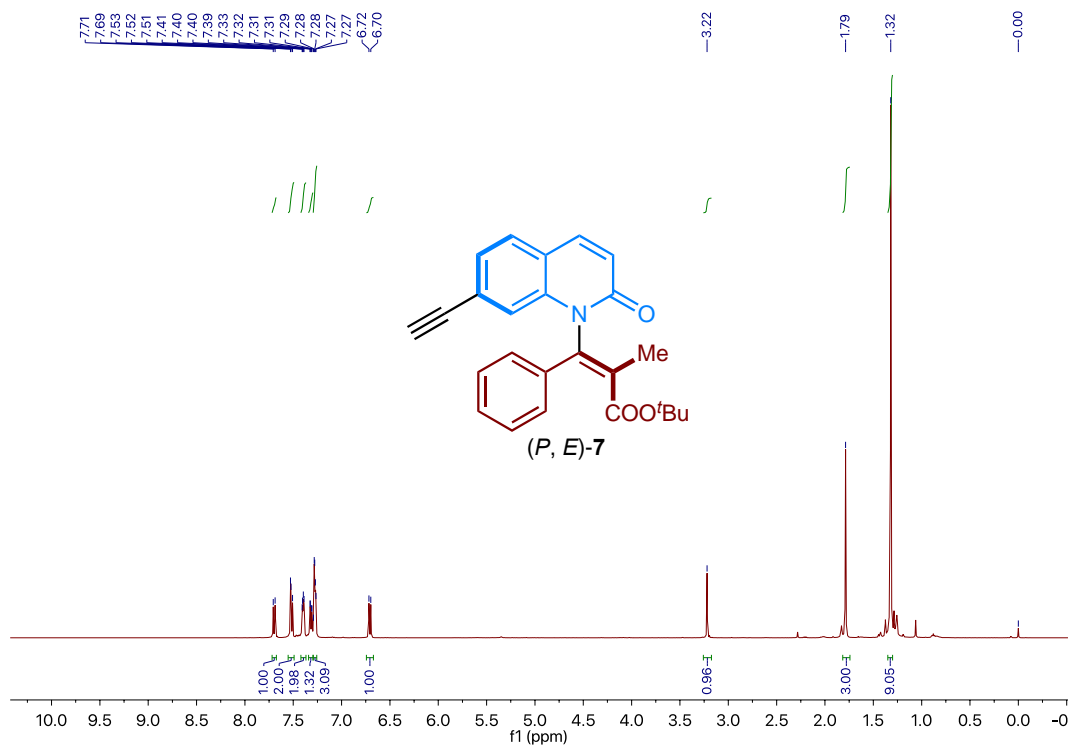

Supplementary Fig. 135. <sup>1</sup>H NMR spectrum of (P, E)-7

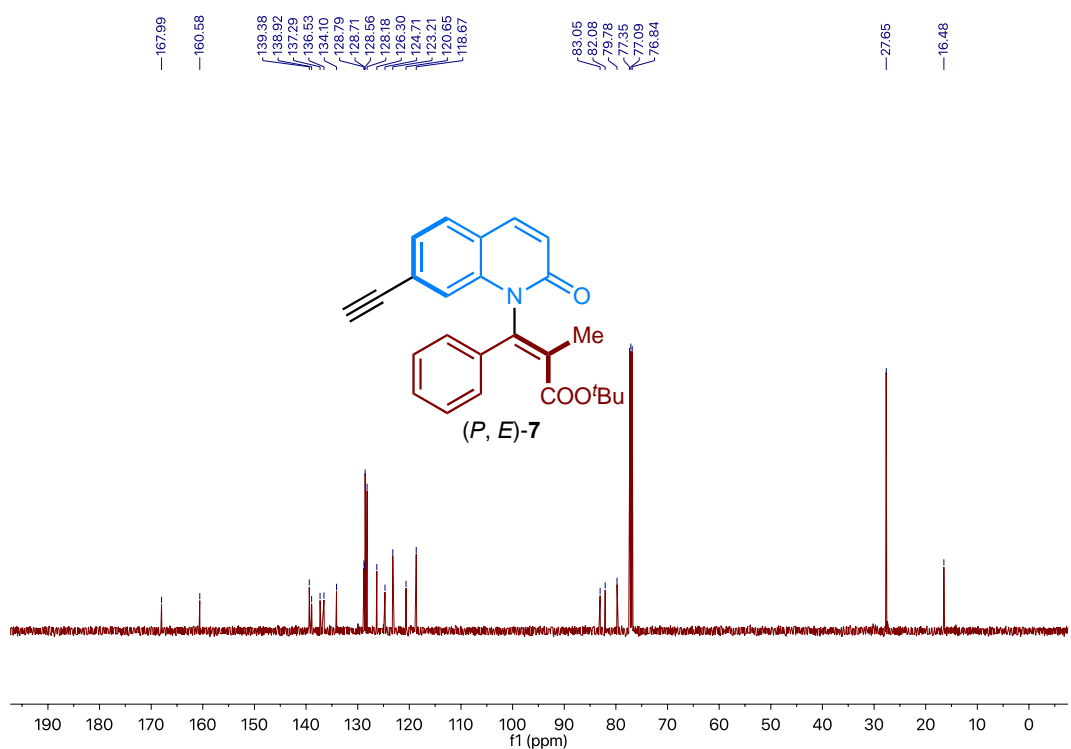

Supplementary Fig. 136. <sup>13</sup>C NMR spectrum of (P, E)-7

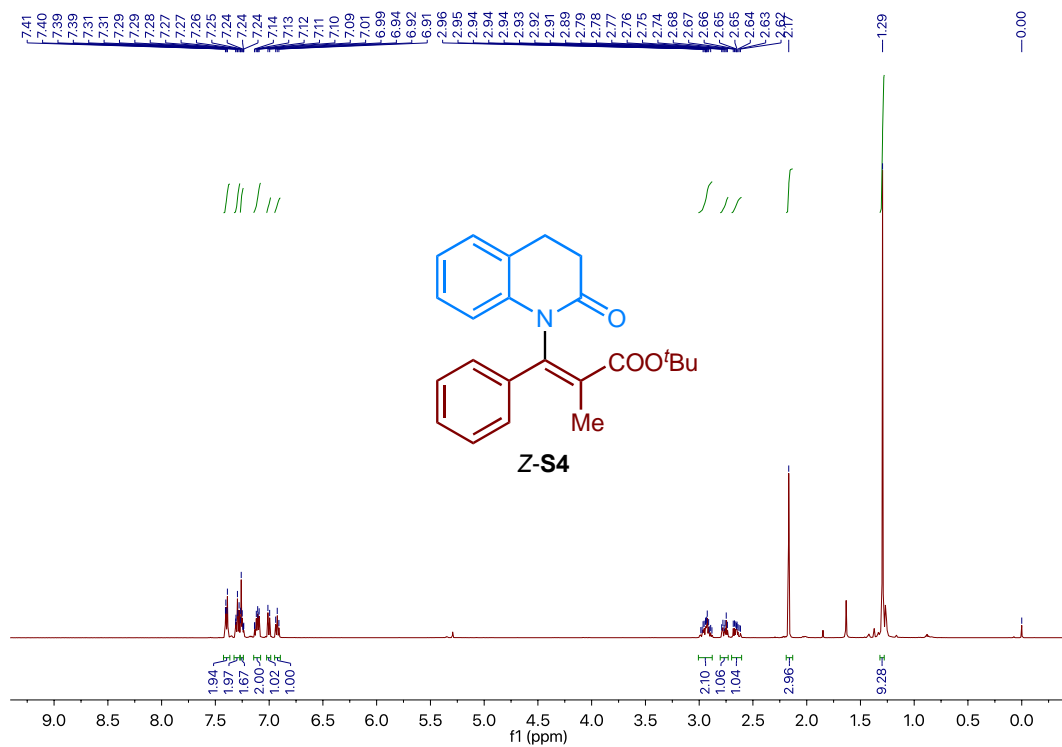

**Supplementary Fig. 137. <sup>1</sup>H NMR spectrum of Z-S4**

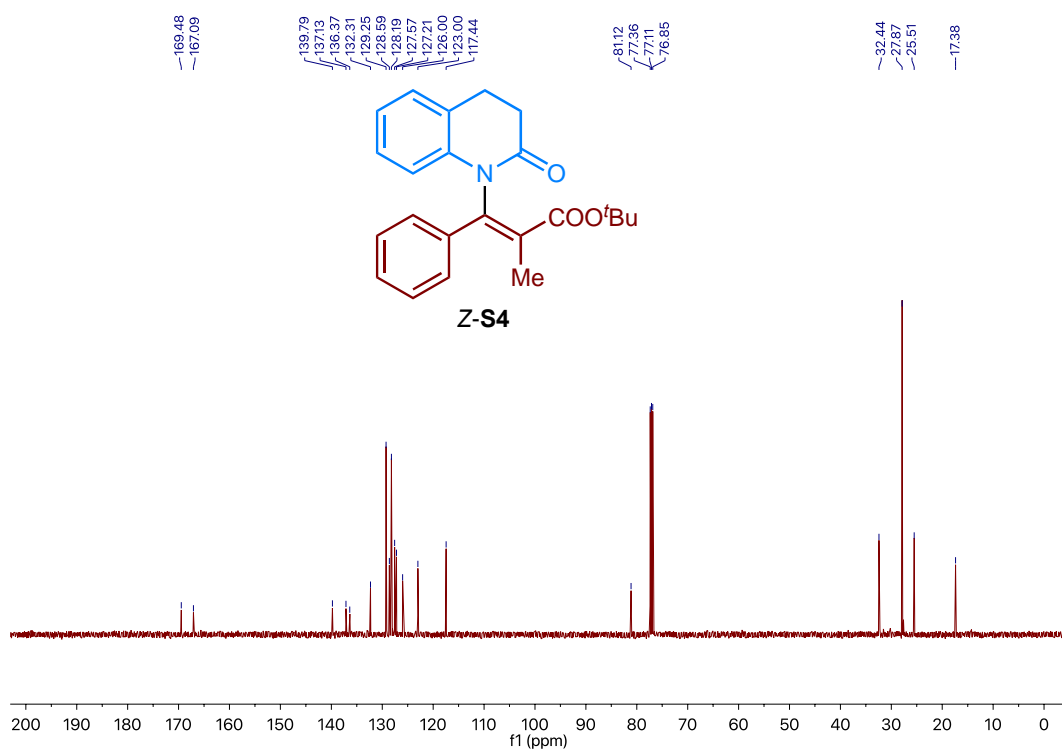

**Supplementary Fig. 138. <sup>13</sup>C NMR spectrum of Z-S4**

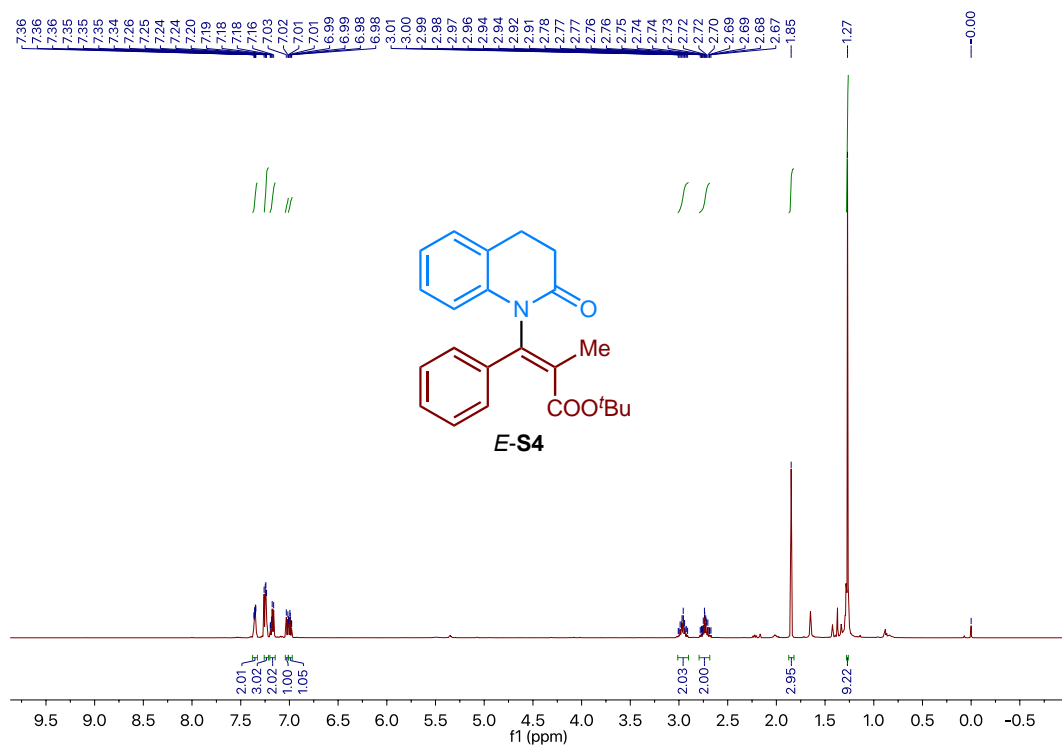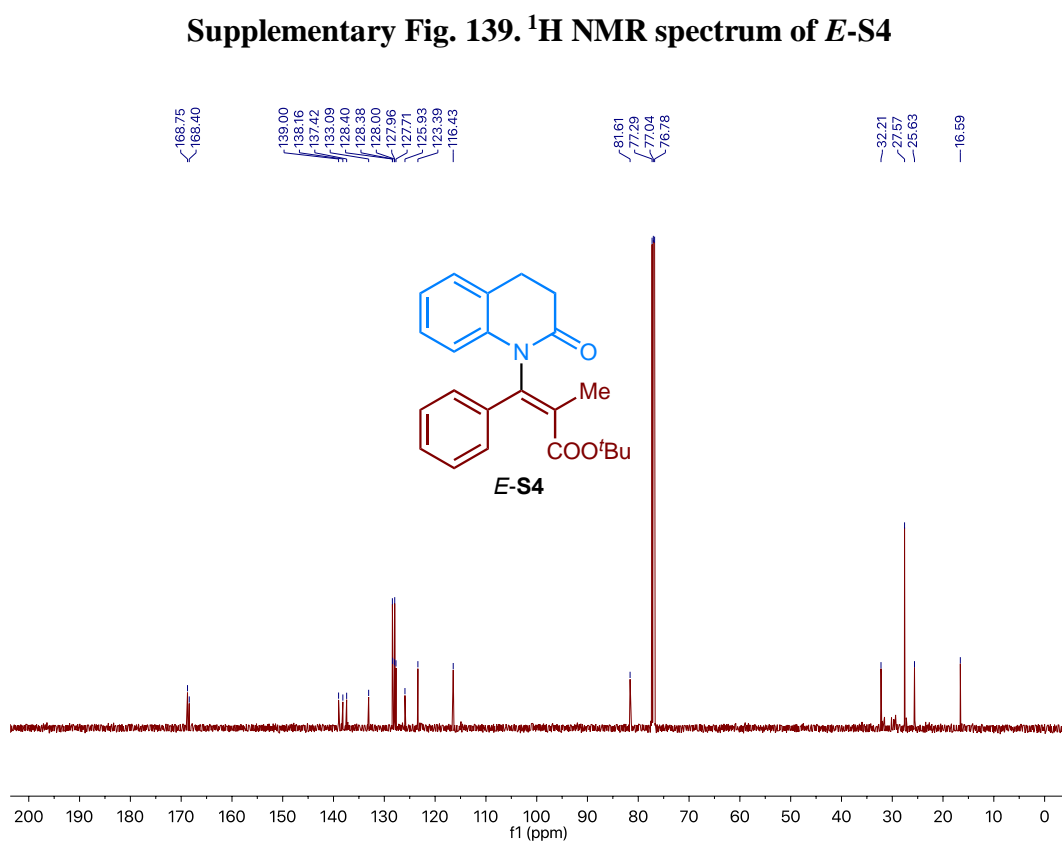

## HPLC spectrum data

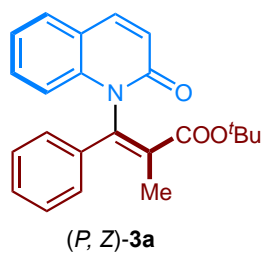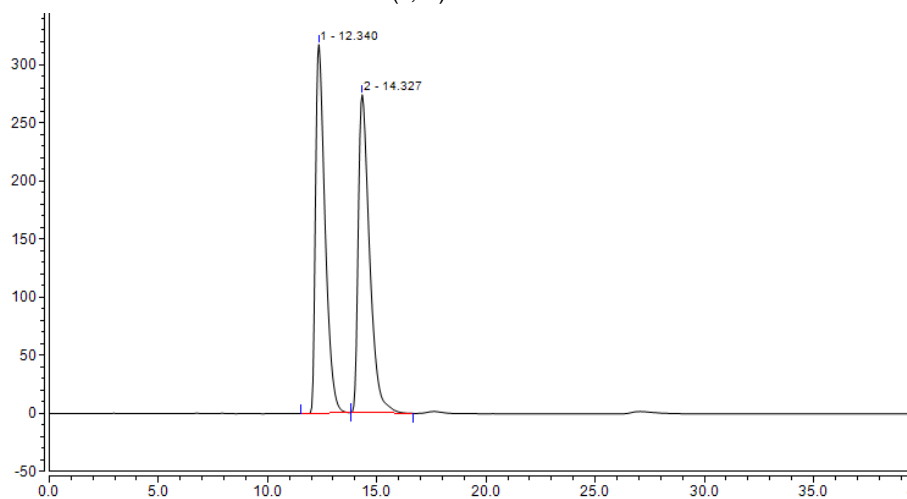

| Peak | Ret. Time (min) | Area (mAu*min) | Height (mAu) | Area % | Height % |
|------|-----------------|----------------|--------------|--------|----------|
| 1    | 12.340          | 160.688        | 317.392      | 49.45  | 53.69    |
| 2    | 14.327          | 164.233        | 273.727      | 50.55  | 46.31    |

Supplementary Fig. 141. HPLC spectrum of racemic (*P, Z*)-3a

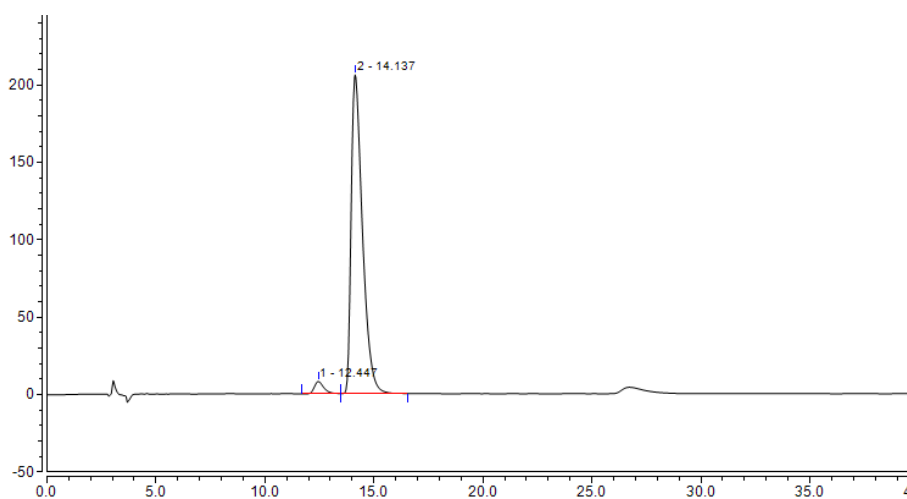

| Peak | Ret. Time (min) | Area (mAu*min) | Height (mAu) | Area % | Height % |
|------|-----------------|----------------|--------------|--------|----------|
| 1    | 12.447          | 3.914          | 7.943        | 3.08   | 3.72     |
| 2    | 14.137          | 123.192        | 205.858      | 96.92  | 96.28    |

Supplementary Fig. 142. HPLC spectrum of chiral (*P, Z*)-3a

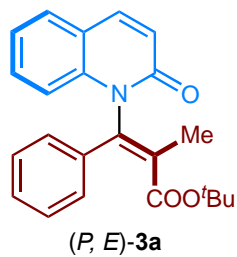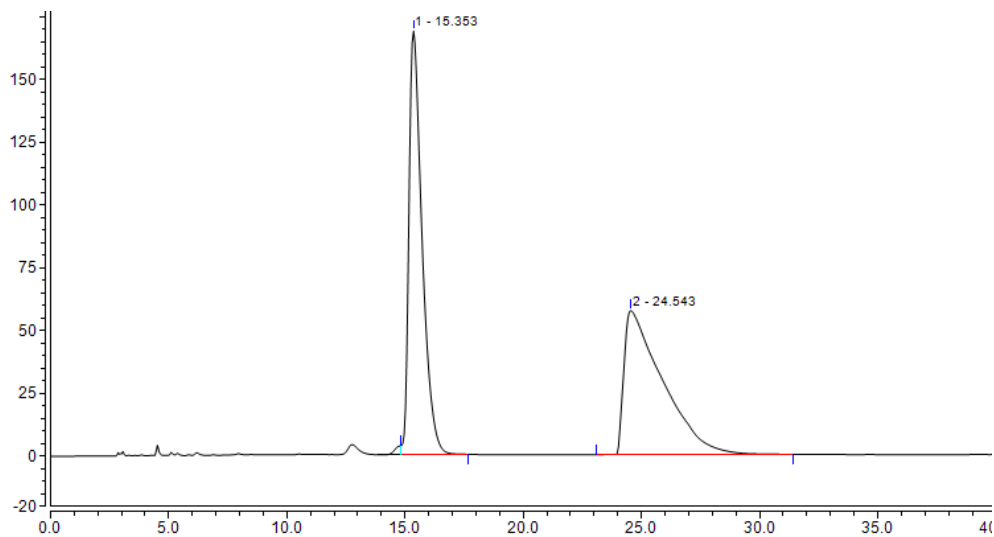

| Peak | Ret. Time (min) | Area (mAu*min) | Height (mAu) | Area % | Height % |
|------|-----------------|----------------|--------------|--------|----------|
| 1    | 15.353          | 108.716        | 168.680      | 50.03  | 74.63    |
| 2    | 24.543          | 108.579        | 57.338       | 49.97  | 25.37    |

**Supplementary Fig. 143. HPLC spectrum of racemic (*P, E*)-3a**

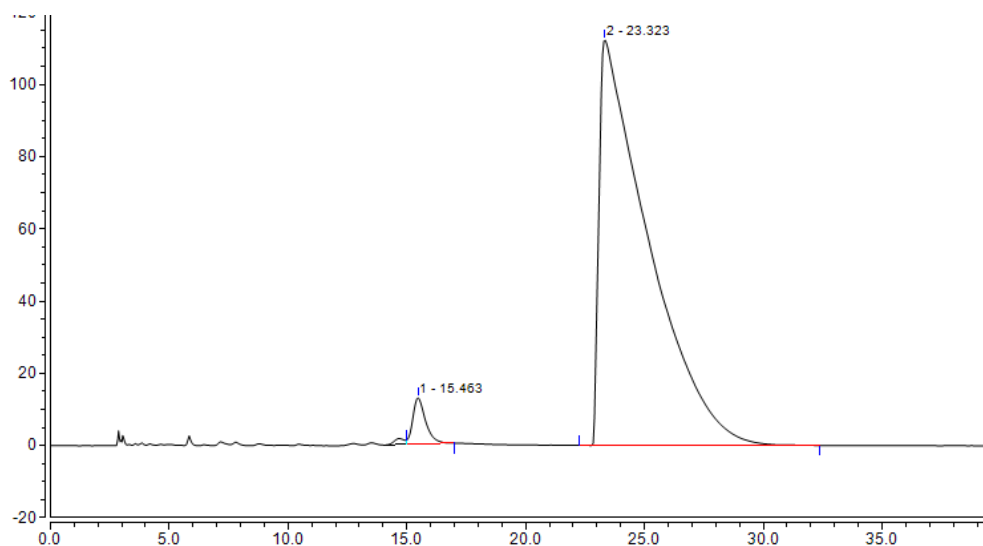

| Peak | Ret. Time (min) | Area (mAu*min) | Height (mAu) | Area % | Height % |
|------|-----------------|----------------|--------------|--------|----------|
| 1    | 15.463          | 8.009          | 12.848       | 2.88   | 10.27    |
| 2    | 23.323          | 270.152        | 112.303      | 97.12  | 89.73    |

**Supplementary Fig. 144. HPLC spectrum of chiral (*P, E*)-3a**

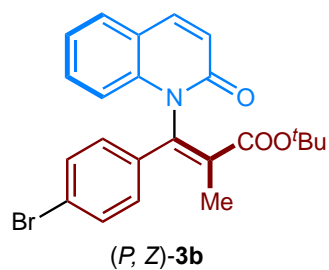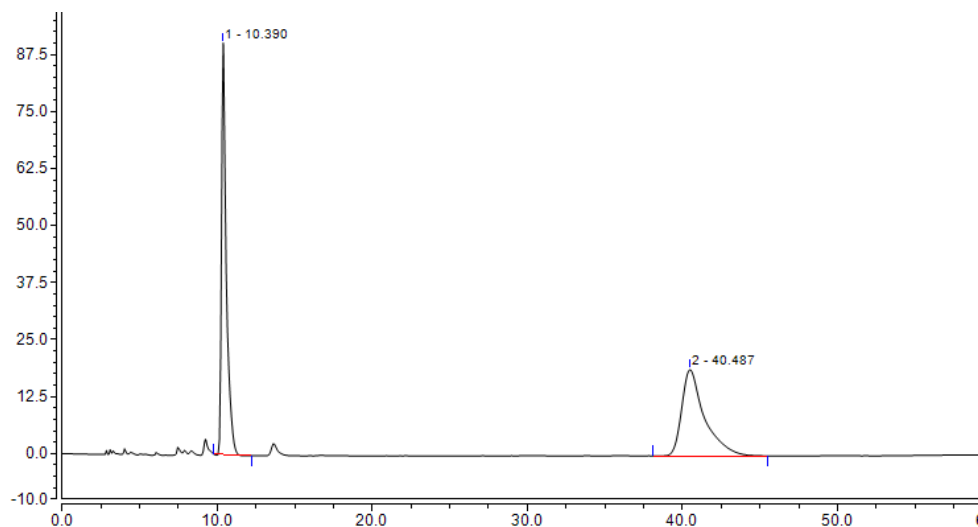

| Peak | Ret. Time (min) | Area (mAu*min) | Height (mAu) | Area % | Height % |
|------|-----------------|----------------|--------------|--------|----------|
| 1    | 10.390          | 31.857         | 90.221       | 49.81  | 82.67    |
| 2    | 40.487          | 32.101         | 18.914       | 50.19  | 17.33    |

**Supplementary Fig. 145. HPLC spectrum of racemic (P, Z)-3b**

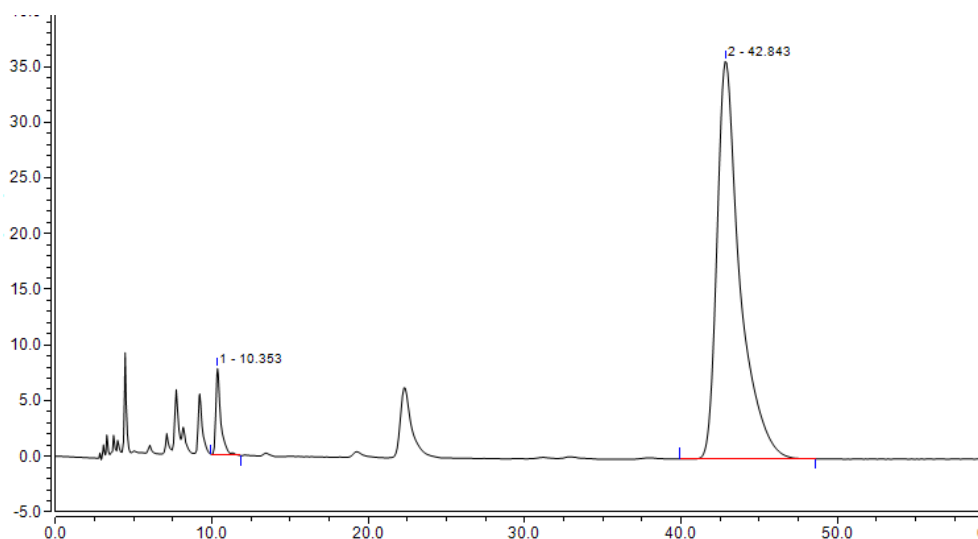

| Peak | Ret. Time (min) | Area (mAu*min) | Height (mAu) | Area % | Height % |
|------|-----------------|----------------|--------------|--------|----------|
| 1    | 10.353          | 2.782          | 7.724        | 4.39   | 17.76    |
| 2    | 42.843          | 60.548         | 35.760       | 95.61  | 82.24    |

**Supplementary Fig. 146. HPLC spectrum of chiral (P, Z)-3b**

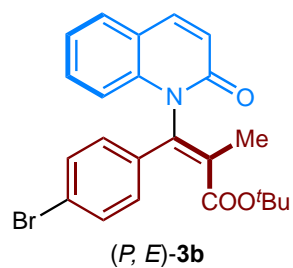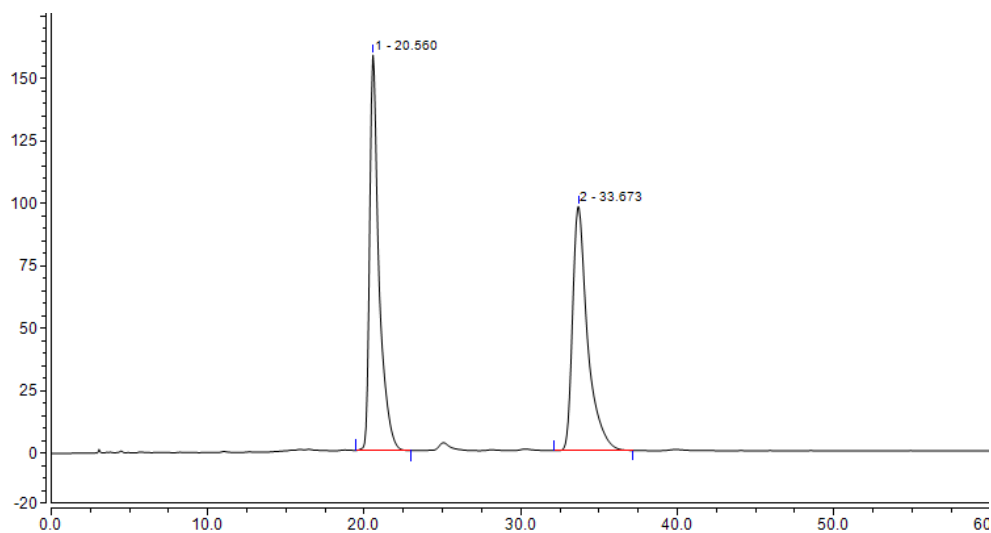

| Peak | Ret. Time (min) | Area (mAu*min) | Height (mAu) | Area % | Height % |
|------|-----------------|----------------|--------------|--------|----------|
| 1    | 20.560          | 109.176        | 158.260      | 50.22  | 61.82    |
| 2    | 33.673          | 108.218        | 97.750       | 49.78  | 38.18    |

**Supplementary Fig. 147. HPLC spectrum of racemic (*P, E*)-3b**

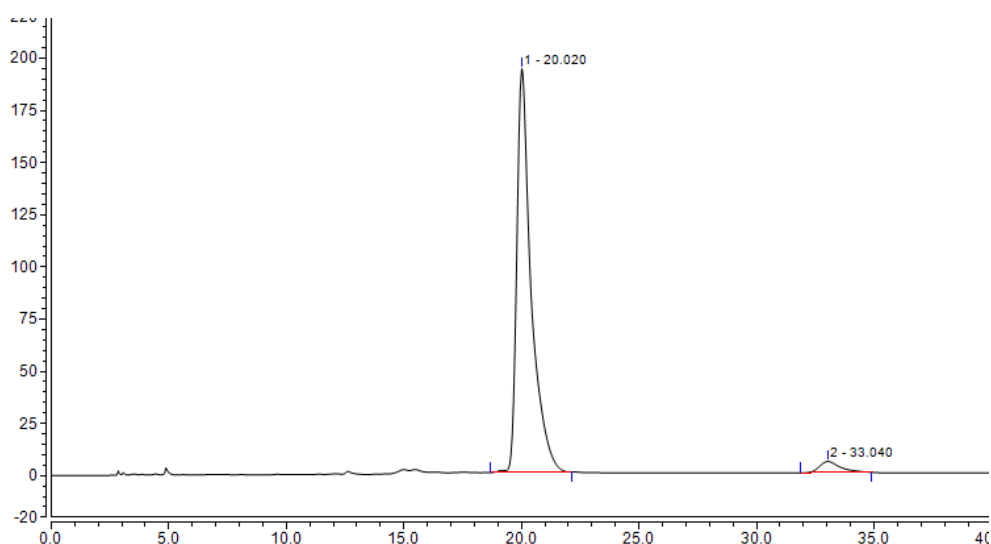

| Peak | Ret. Time (min) | Area (mAu*min) | Height (mAu) | Area % | Height % |
|------|-----------------|----------------|--------------|--------|----------|
| 1    | 20.020          | 136.301        | 193.492      | 96.06  | 97.30    |
| 2    | 33.040          | 5.595          | 5.369        | 3.94   | 2.70     |

**Supplementary Fig. 148. HPLC spectrum of chiral (*P, E*)-3b**

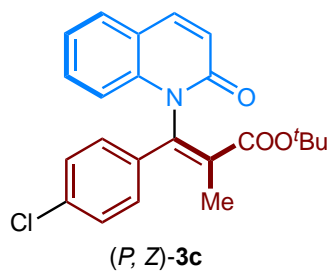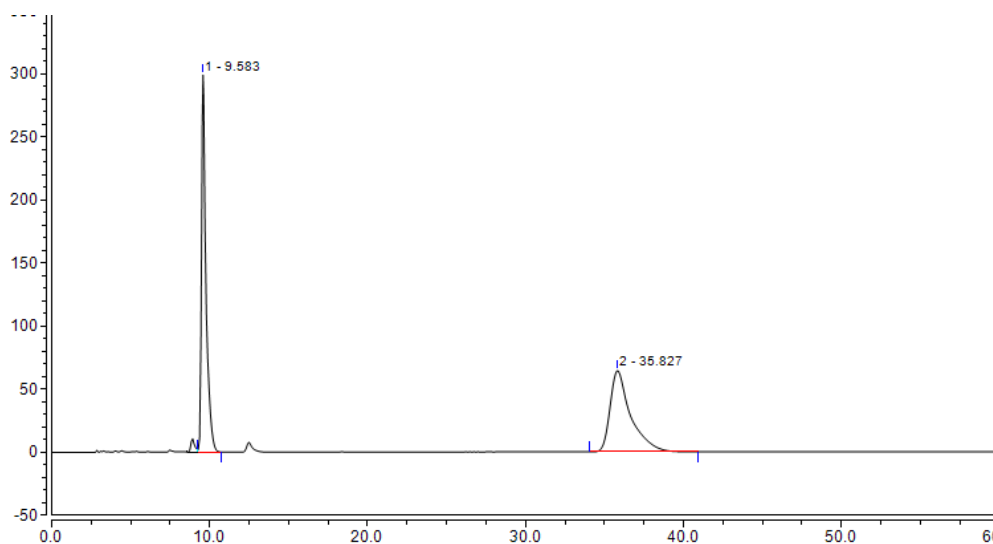

| Peak | Ret. Time (min) | Area (mAu*min) | Height (mAu) | Area % | Height % |
|------|-----------------|----------------|--------------|--------|----------|
| 1    | 9.583           | 96.842         | 298.764      | 49.98  | 82.26    |
| 2    | 35.827          | 96.919         | 64.435       | 50.02  | 17.74    |

**Supplementary Fig. 149. HPLC spectrum of racemic (P, Z)-3c**

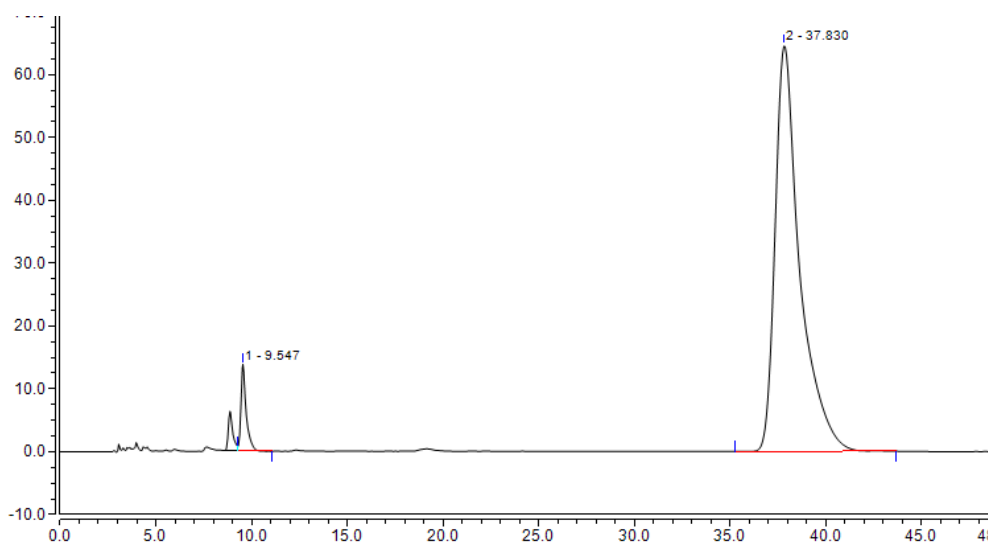

| Peak | Ret. Time (min) | Area (mAu*min) | Height (mAu) | Area % | Height % |
|------|-----------------|----------------|--------------|--------|----------|
| 1    | 9.547           | 4.305          | 13.756       | 4.28   | 17.55    |
| 2    | 37.830          | 96.370         | 64.624       | 95.72  | 82.45    |

**Supplementary Fig. 150. HPLC spectrum of chiral (P, Z)-3c**



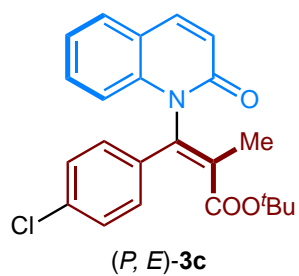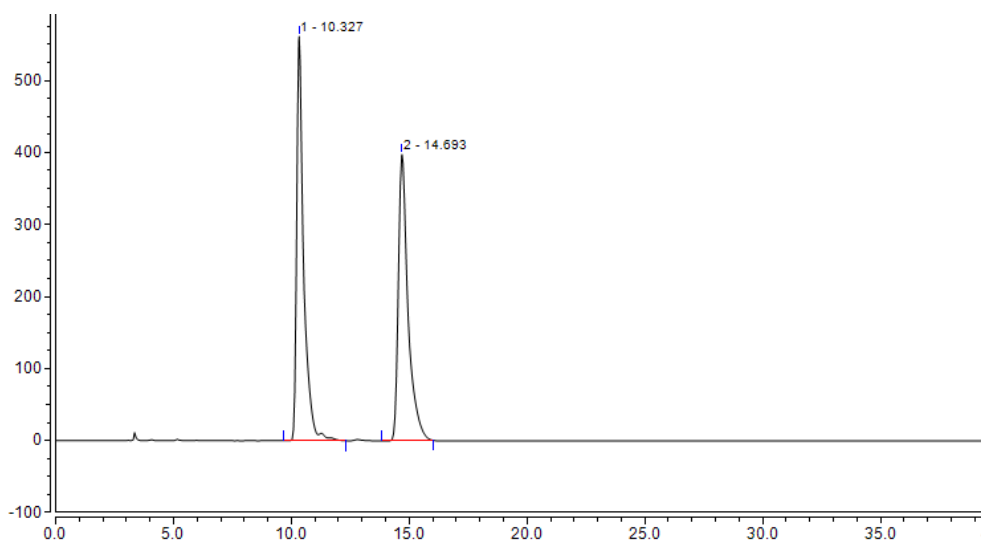

| Peak | Ret. Time (min) | Area (mAu*min) | Height (mAu) | Area % | Height % |
|------|-----------------|----------------|--------------|--------|----------|
| 1    | 10.327          | 193.329        | 561.602      | 50.60  | 58.54    |
| 2    | 14.693          | 188.723        | 397.677      | 49.40  | 41.46    |

**Supplementary Fig. 151. HPLC spectrum of racemic (P, E)-3c**

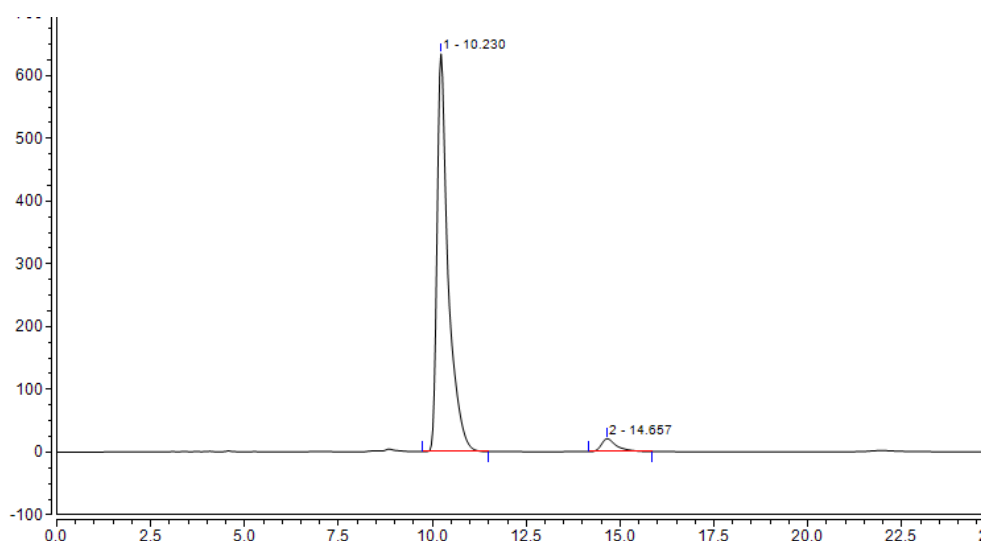

| Peak | Ret. Time (min) | Area (mAu*min) | Height (mAu) | Area % | Height % |
|------|-----------------|----------------|--------------|--------|----------|
| 1    | 10.230          | 217.747        | 633.648      | 95.73  | 96.85    |
| 2    | 14.657          | 9.721          | 20.641       | 4.27   | 3.15     |

**Supplementary Fig. 152. HPLC spectrum of chiral (P, E)-3c**

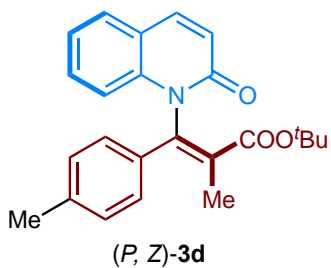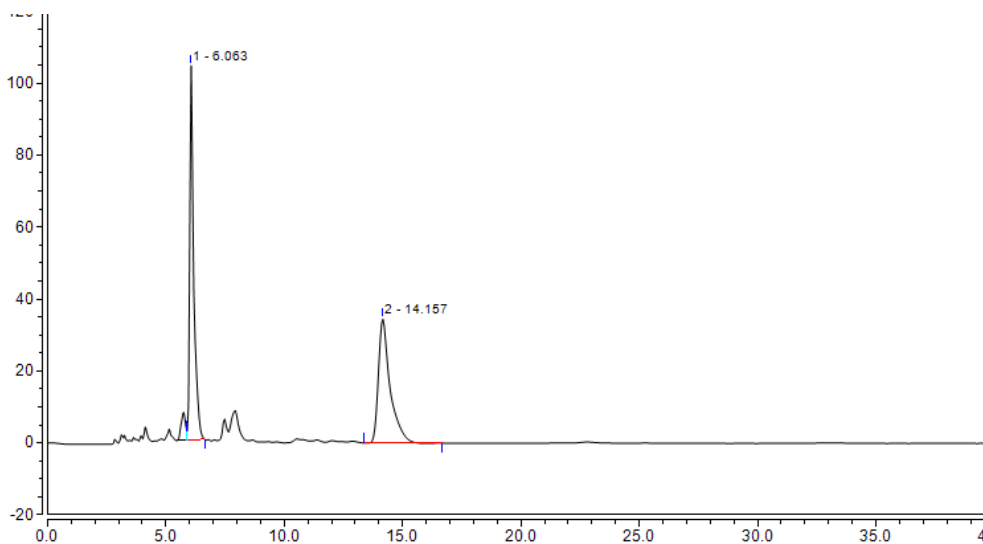

| Peak | Ret. Time (min) | Area (mAu*min) | Height (mAu) | Area % | Height % |
|------|-----------------|----------------|--------------|--------|----------|
| 1    | 6.063           | 20.215         | 104.082      | 50.67  | 75.10    |
| 2    | 14.157          | 19.681         | 34.515       | 49.33  | 24.90    |

**Supplementary Fig. 153. HPLC spectrum of racemic (P, Z)-3d**

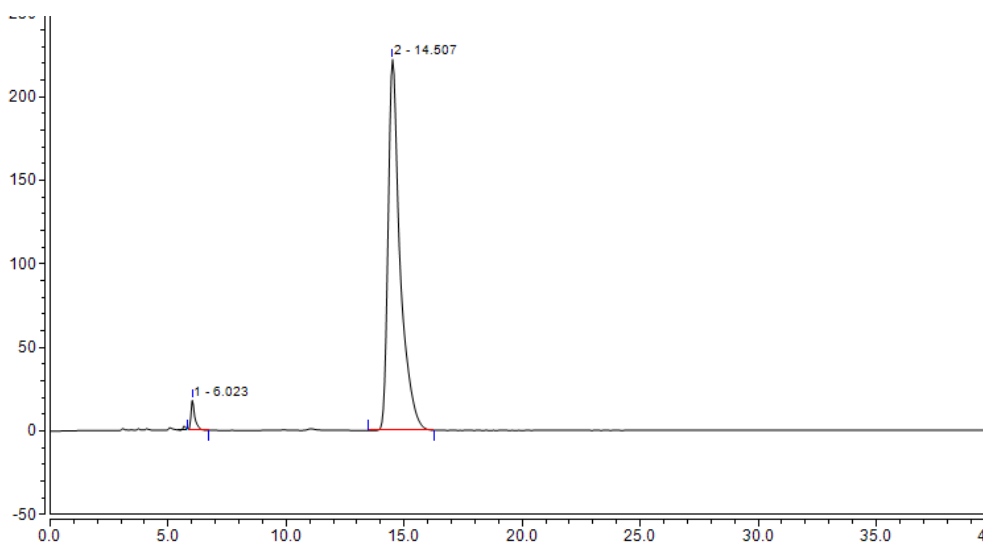

| Peak | Ret. Time (min) | Area (mAu*min) | Height (mAu) | Area % | Height % |
|------|-----------------|----------------|--------------|--------|----------|
| 1    | 6.023           | 3.394          | 17.871       | 2.54   | 7.45     |
| 2    | 14.507          | 130.425        | 221.990      | 97.46  | 92.55    |

**Supplementary Fig. 154. HPLC spectrum of chiral (P, Z)-3d**

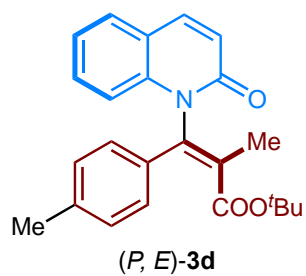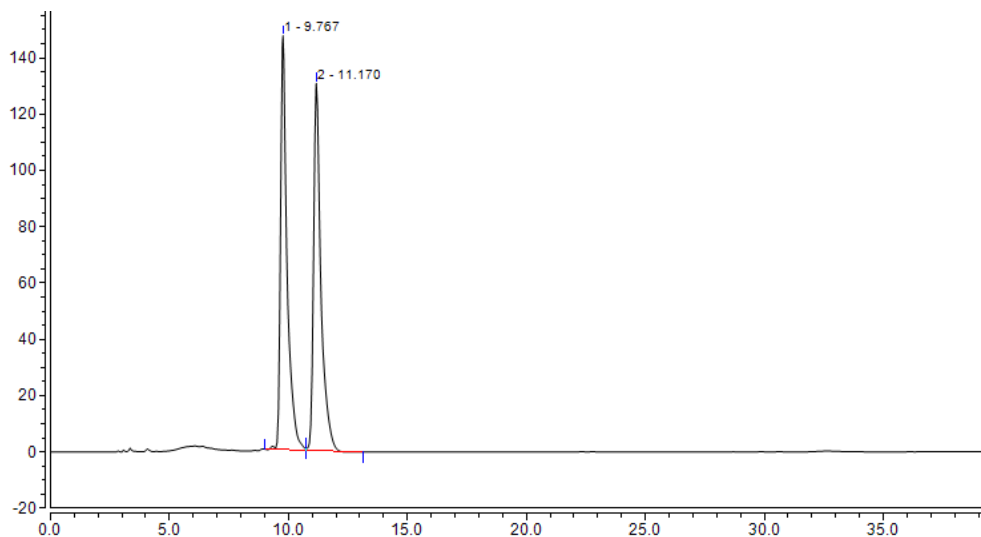

| Peak | Ret. Time (min) | Area (mAu*min) | Height (mAu) | Area % | Height % |
|------|-----------------|----------------|--------------|--------|----------|
| 1    | 9.767           | 46.787         | 147.038      | 50.22  | 52.99    |
| 2    | 11.170          | 46.386         | 130.427      | 49.78  | 47.01    |

**Supplementary Fig. 155. HPLC spectrum of racemic (P, E)-3d**

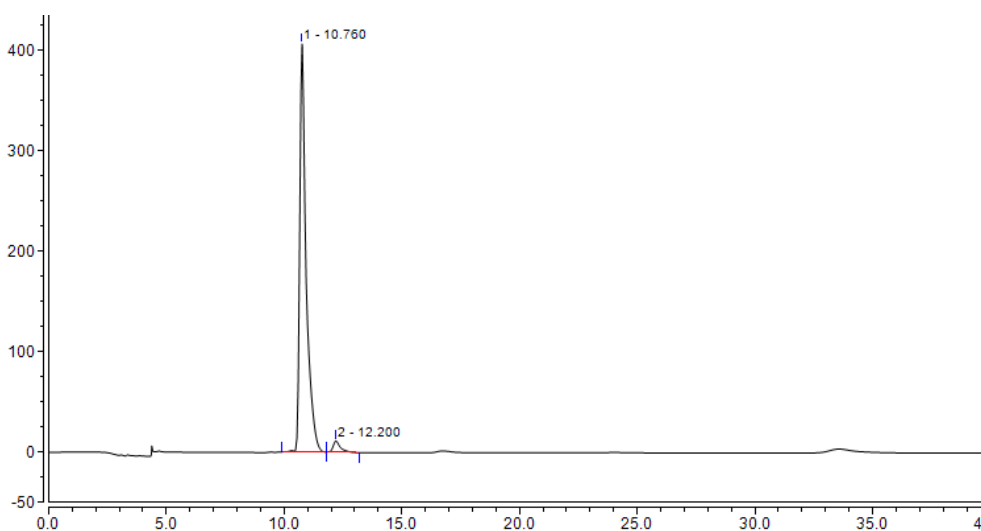

| Peak | Ret. Time (min) | Area (mAu*min) | Height (mAu) | Area % | Height % |
|------|-----------------|----------------|--------------|--------|----------|
| 1    | 10.760          | 128.295        | 406.163      | 97.04  | 97.31    |
| 2    | 12.200          | 3.915          | 11.210       | 2.96   | 2.69     |

**Supplementary Fig. 156. HPLC spectrum of chiral (P, E)-3d**

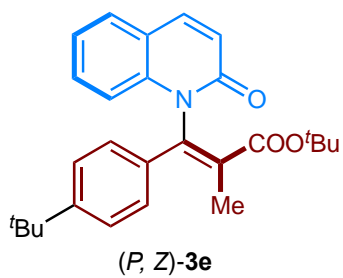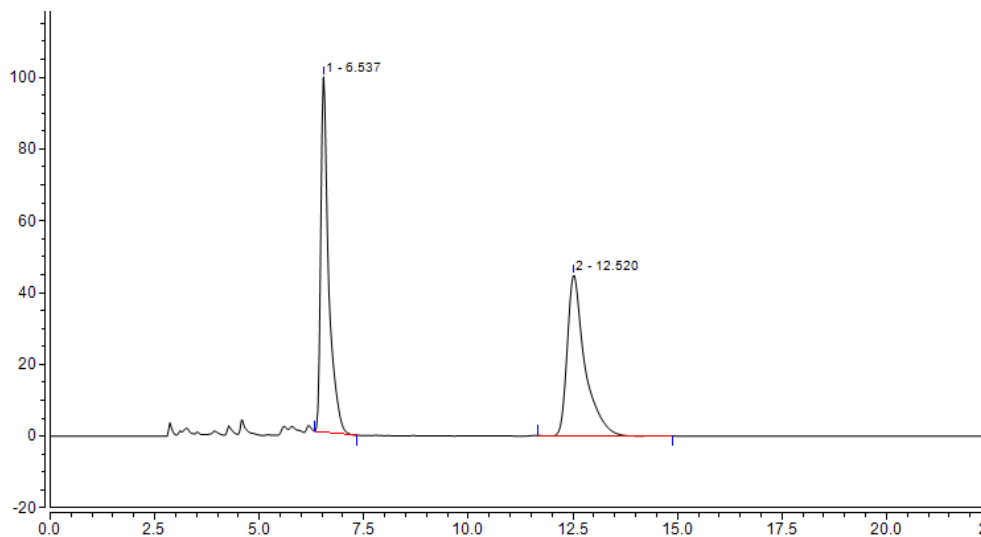

| Peak | Ret. Time (min) | Area (mAu*min) | Height (mAu) | Area % | Height % |
|------|-----------------|----------------|--------------|--------|----------|
| 1    | 6.537           | 21.592         | 99.062       | 50.00  | 68.87    |
| 2    | 12.520          | 21.594         | 44.777       | 50.00  | 31.13    |

**Supplementary Fig. 157. HPLC spectrum of racemic (P, Z)-3e**

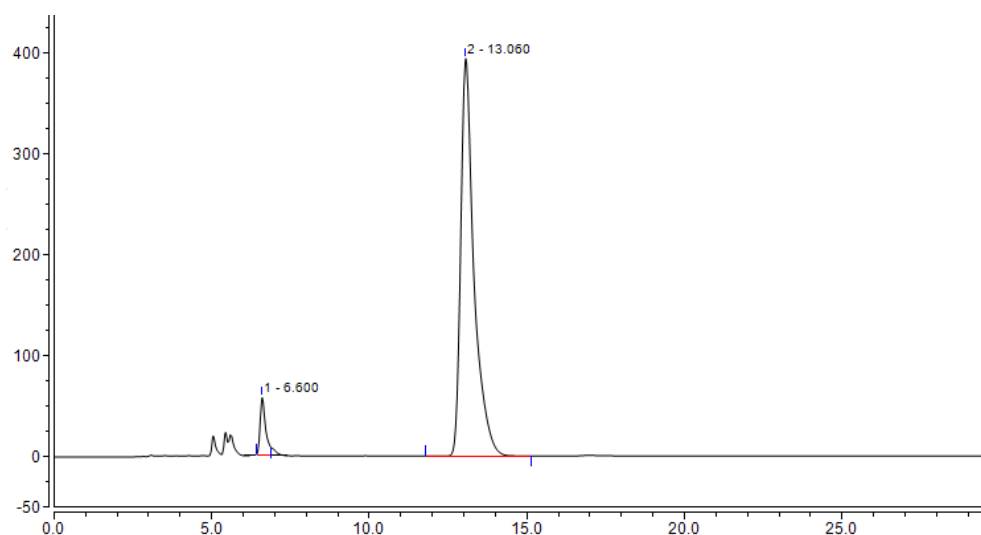

| Peak | Ret. Time (min) | Area (mAu*min) | Height (mAu) | Area % | Height % |
|------|-----------------|----------------|--------------|--------|----------|
| 1    | 6.600           | 11.740         | 57.628       | 5.78   | 12.76    |
| 2    | 13.060          | 191.459        | 393.943      | 94.22  | 87.24    |

**Supplementary Fig. 158. HPLC spectrum of chiral (P, Z)-3e**

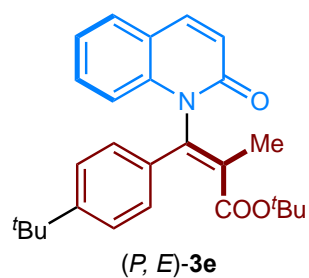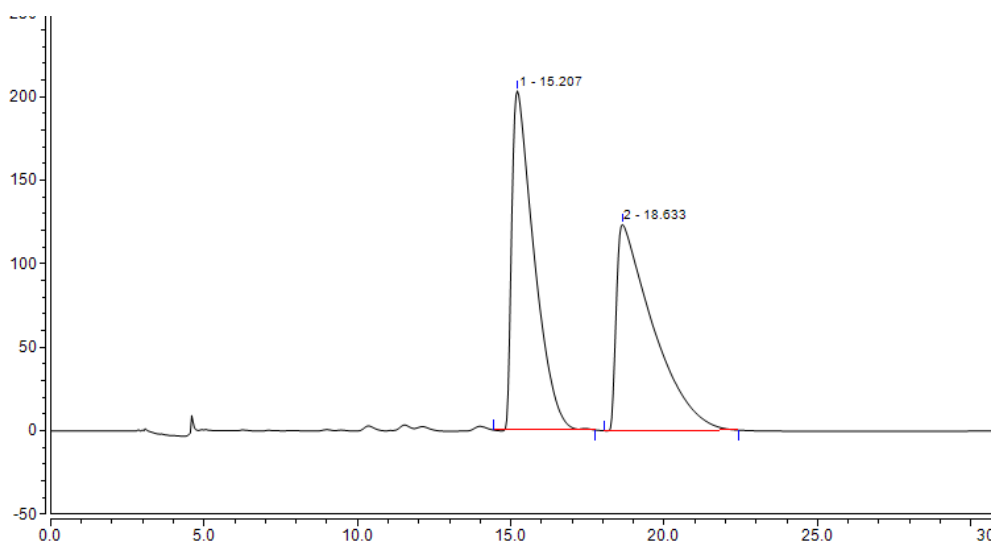

| Peak | Ret. Time (min) | Area (mAu*min) | Height (mAu) | Area % | Height % |
|------|-----------------|----------------|--------------|--------|----------|
| 1    | 15.207          | 170.897        | 203.136      | 50.04  | 62.20    |
| 2    | 18.633          | 170.605        | 123.447      | 49.96  | 37.80    |

**Supplementary Fig. 159. HPLC spectrum of racemic (P, E)-3e**

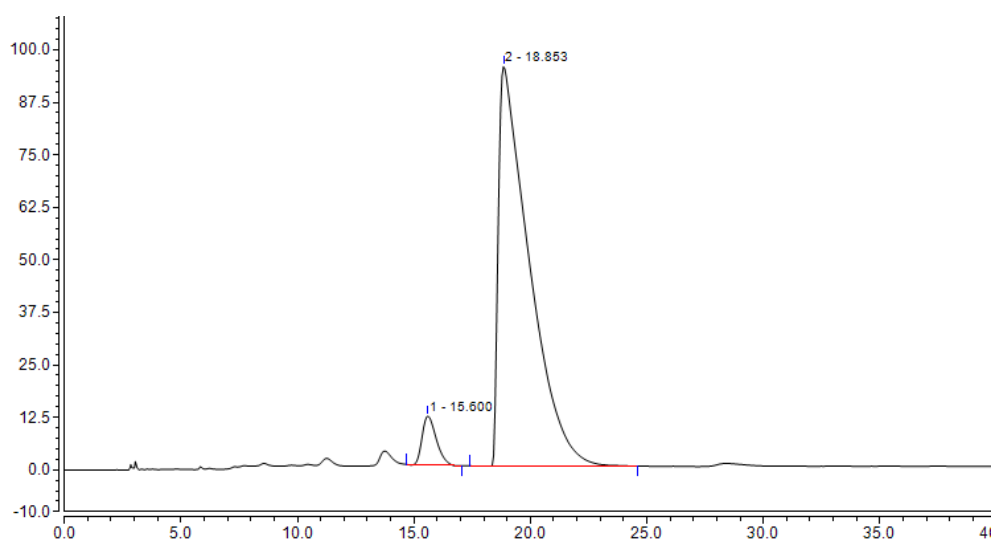

| Peak | Ret. Time (min) | Area (mAu*min) | Height (mAu) | Area % | Height % |
|------|-----------------|----------------|--------------|--------|----------|
| 1    | 15.600          | 8.122          | 11.628       | 5.29   | 10.89    |
| 2    | 18.853          | 145.504        | 95.132       | 94.71  | 89.11    |

**Supplementary Fig. 160. HPLC spectrum of chiral (P, E)-3e**

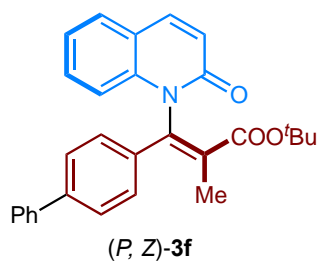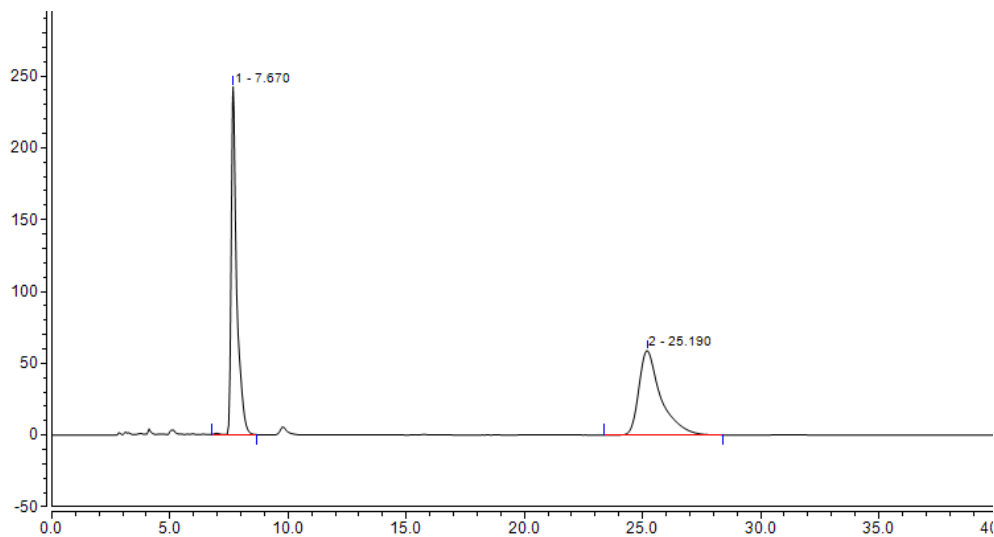

| Peak | Ret. Time (min) | Area (mAu*min) | Height (mAu) | Area % | Height % |
|------|-----------------|----------------|--------------|--------|----------|
| 1    | 7.670           | 65.061         | 242.222      | 50.76  | 80.47    |
| 2    | 25.190          | 63.106         | 58.781       | 49.24  | 19.53    |

**Supplementary Fig. 161. HPLC spectrum of racemic (P, Z)-3f**

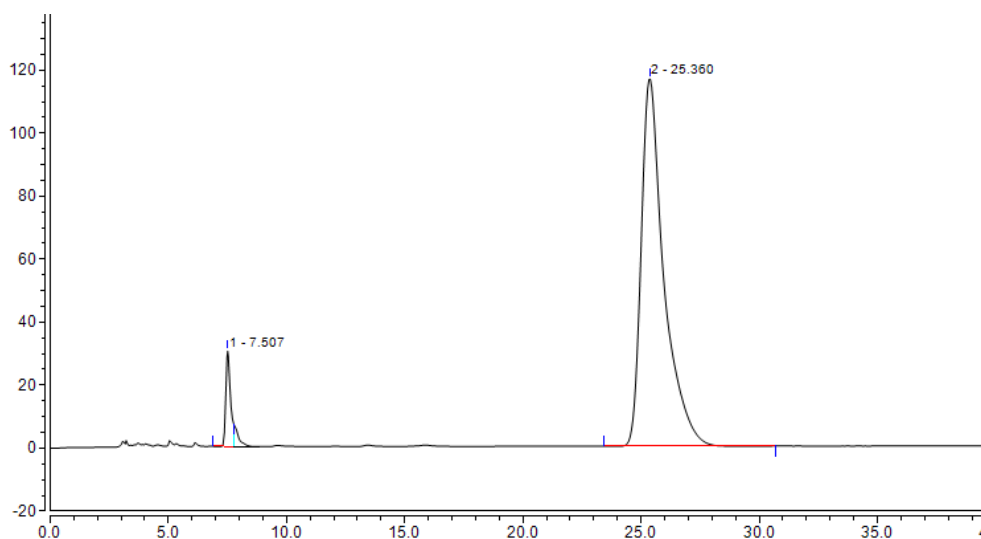

| Peak | Ret. Time (min) | Area (mAu*min) | Height (mAu) | Area % | Height % |
|------|-----------------|----------------|--------------|--------|----------|
| 1    | 7.507           | 6.919          | 30.256       | 5.08   | 20.57    |
| 2    | 25.360          | 129.183        | 116.838      | 94.92  | 79.43    |

**Supplementary Fig. 162. HPLC spectrum of chiral (P, Z)-3f**

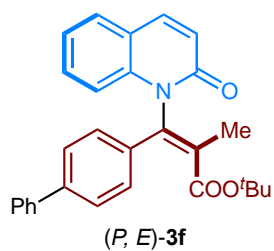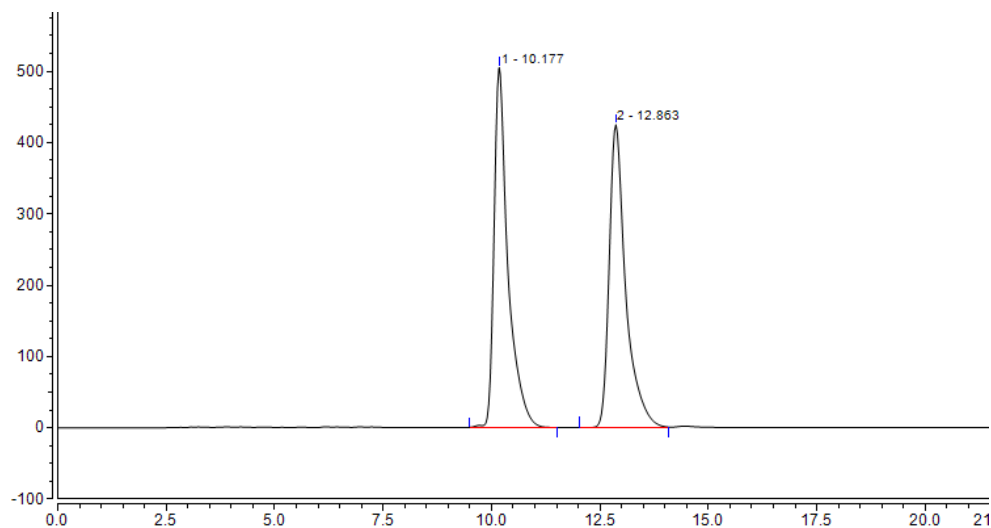

| Peak | Ret. Time (min) | Area (mAu*min) | Height (mAu) | Area % | Height % |
|------|-----------------|----------------|--------------|--------|----------|
| 1    | 10.177          | 186.967        | 504.843      | 50.04  | 54.30    |
| 2    | 12.863          | 186.702        | 424.808      | 49.96  | 45.70    |

**Supplementary Fig. 163. HPLC spectrum of racemic (*P, E*)-3f**

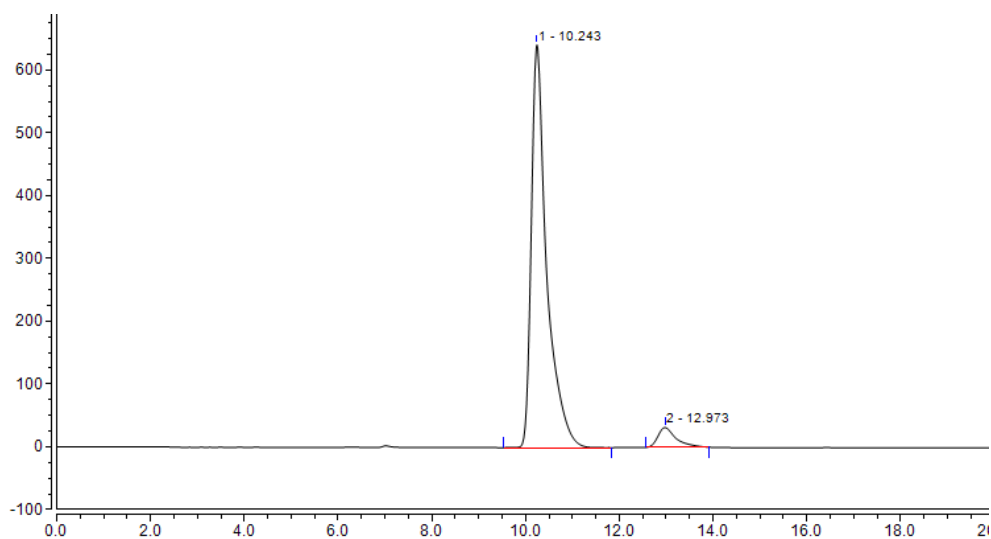

| Peak | Ret. Time (min) | Area (mAu*min) | Height (mAu) | Area % | Height % |
|------|-----------------|----------------|--------------|--------|----------|
| 1    | 10.243          | 243.726        | 641.582      | 94.49  | 95.30    |
| 2    | 12.973          | 14.209         | 31.643       | 5.51   | 4.70     |

**Supplementary Fig. 164. HPLC spectrum of chiral (*P, E*)-3f**

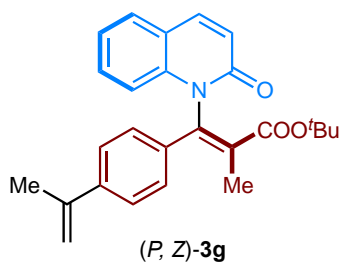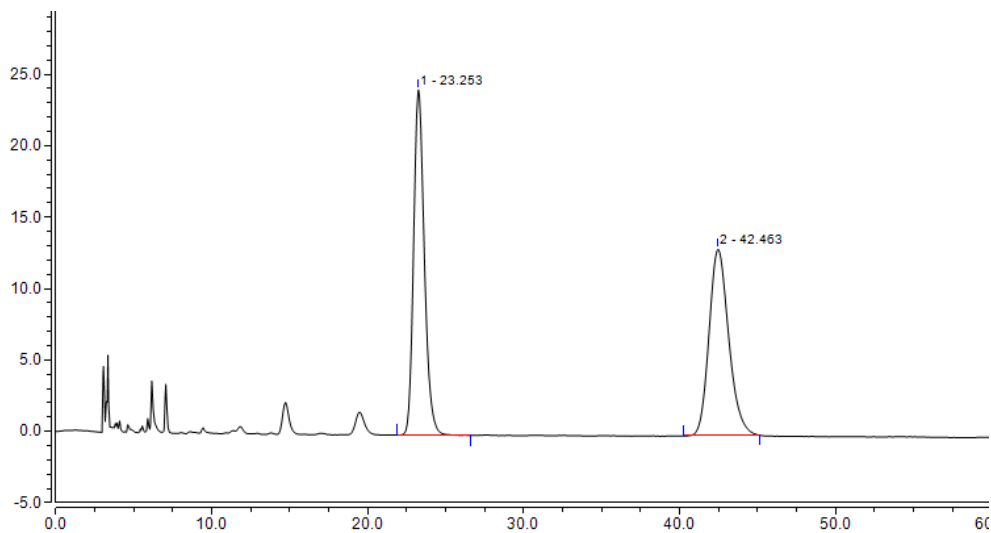

| Peak | Ret. Time (min) | Area (mAu*min) | Height (mAu) | Area % | Height % |
|------|-----------------|----------------|--------------|--------|----------|
| 1    | 23.253          | 19.276         | 24.189       | 50.32  | 64.95    |
| 2    | 42.463          | 19.031         | 13.054       | 49.68  | 35.05    |

**Supplementary Fig. 165. HPLC spectrum of racemic (P, Z)-3g**

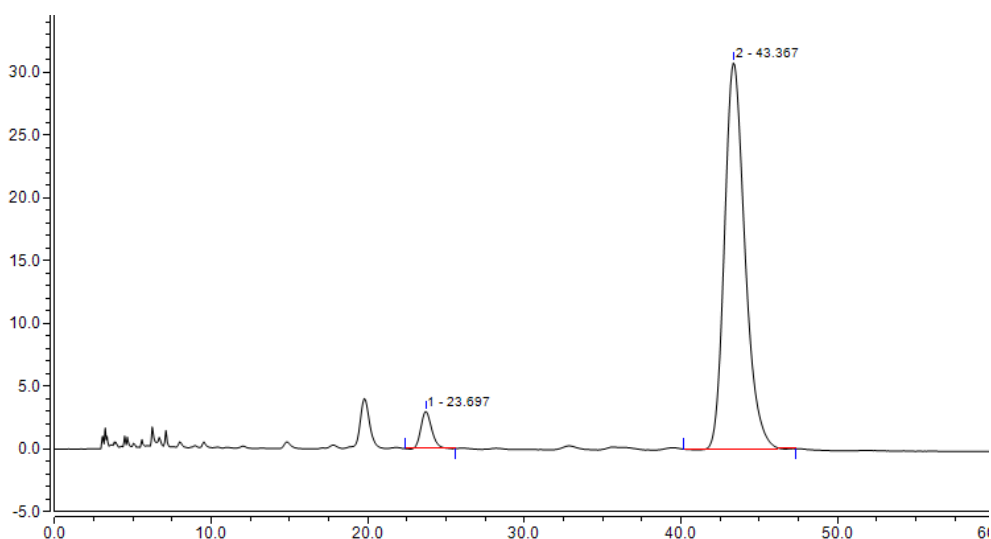

| Peak | Ret. Time (min) | Area (mAu*min) | Height (mAu) | Area % | Height % |
|------|-----------------|----------------|--------------|--------|----------|
| 1    | 23.697          | 2.346          | 2.964        | 4.82   | 8.79     |
| 2    | 43.367          | 46.288         | 30.761       | 95.18  | 91.21    |

**Supplementary Fig. 166. HPLC spectrum of chiral (P, Z)-3g**



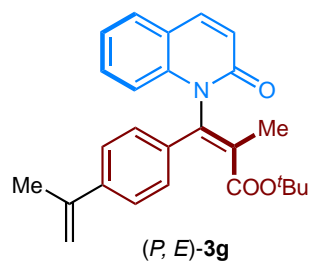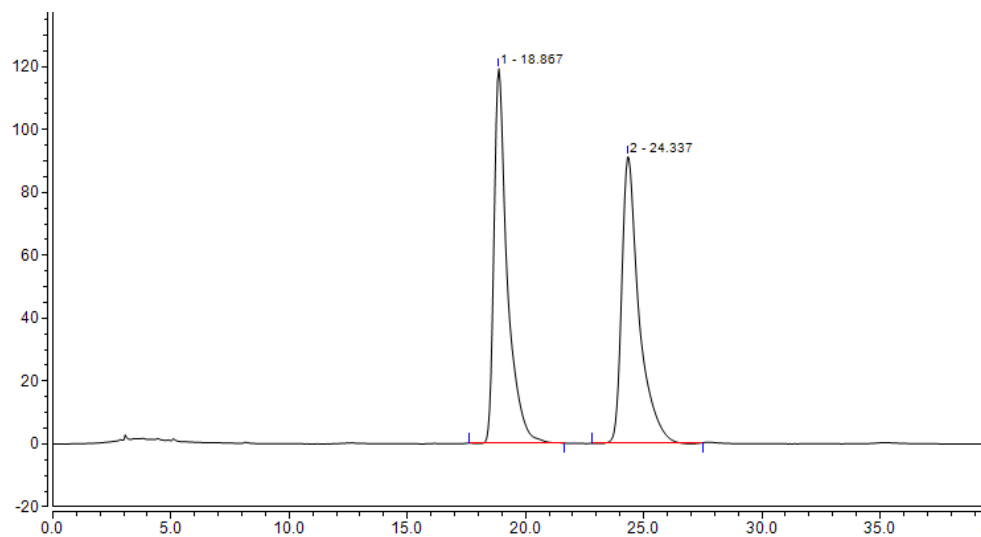

| Peak | Ret. Time (min) | Area (mAu*min) | Height (mAu) | Area % | Height % |
|------|-----------------|----------------|--------------|--------|----------|
| 1    | 18.867          | 77.771         | 119.158      | 50.39  | 56.65    |
| 2    | 24.337          | 76.571         | 91.176       | 49.61  | 43.35    |

**Supplementary Fig. 167. HPLC spectrum of racemic (P, E)-3g**

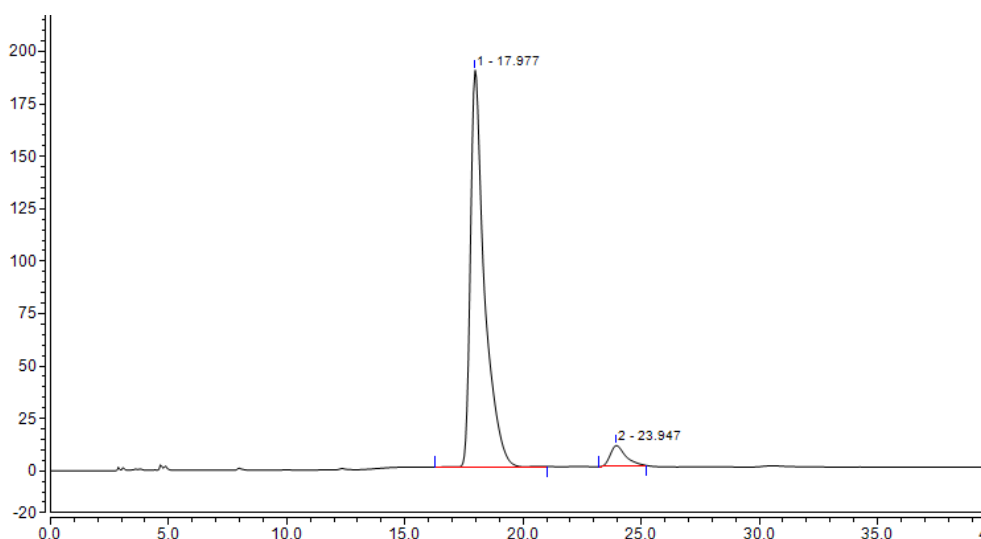

| Peak | Ret. Time (min) | Area (mAu*min) | Height (mAu) | Area % | Height % |
|------|-----------------|----------------|--------------|--------|----------|
| 1    | 17.977          | 129.636        | 189.248      | 94.53  | 95.02    |
| 2    | 23.947          | 7.502          | 9.918        | 5.47   | 4.98     |

**Supplementary Fig. 168. HPLC spectrum of chiral (P, E)-3g**

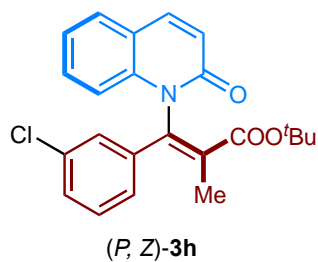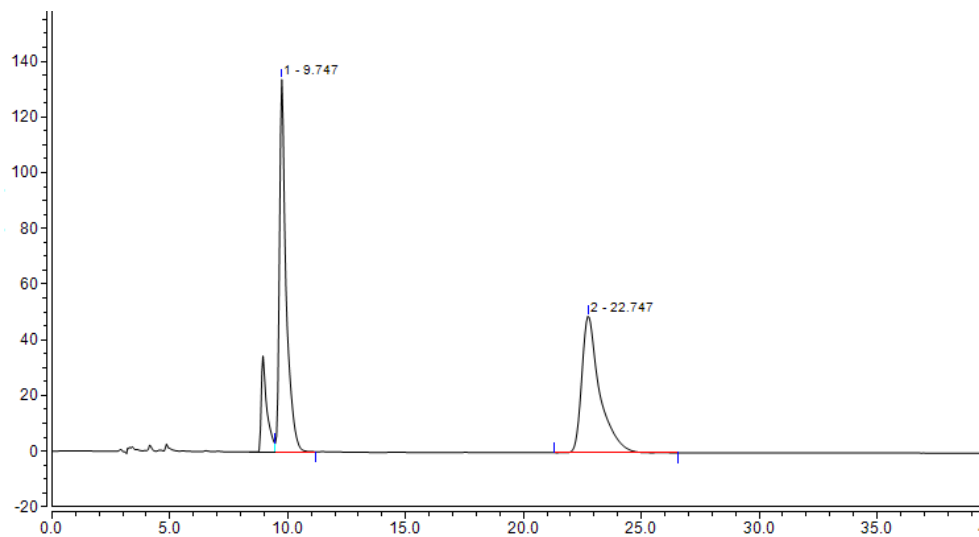

| Peak | Ret. Time (min) | Area (mAu*min) | Height (mAu) | Area % | Height % |
|------|-----------------|----------------|--------------|--------|----------|
| 1    | 9.747           | 43.739         | 133.712      | 50.45  | 73.14    |
| 2    | 22.747          | 42.962         | 49.093       | 49.55  | 26.86    |

**Supplementary Fig. 169. HPLC spectrum of racemic (P, Z)-3h**

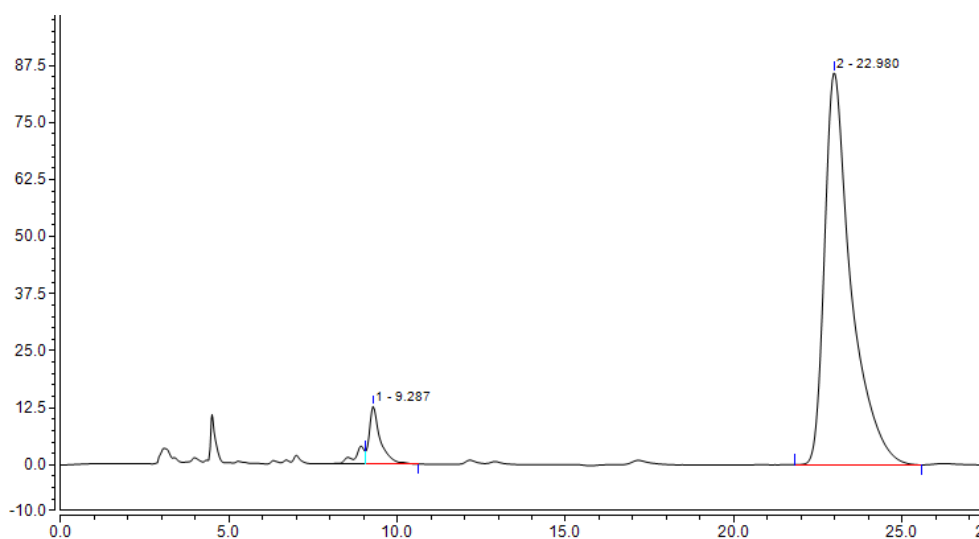

| Peak | Ret. Time (min) | Area (mAu*min) | Height (mAu) | Area % | Height % |
|------|-----------------|----------------|--------------|--------|----------|
| 1    | 9.287           | 4.718          | 12.586       | 5.69   | 12.78    |
| 2    | 22.980          | 78.267         | 85.904       | 94.31  | 87.22    |

**Supplementary Fig. 170. HPLC spectrum of chiral (P, Z)-3h**

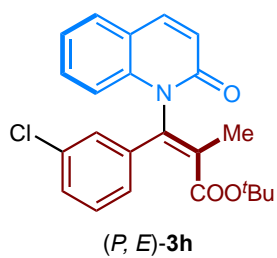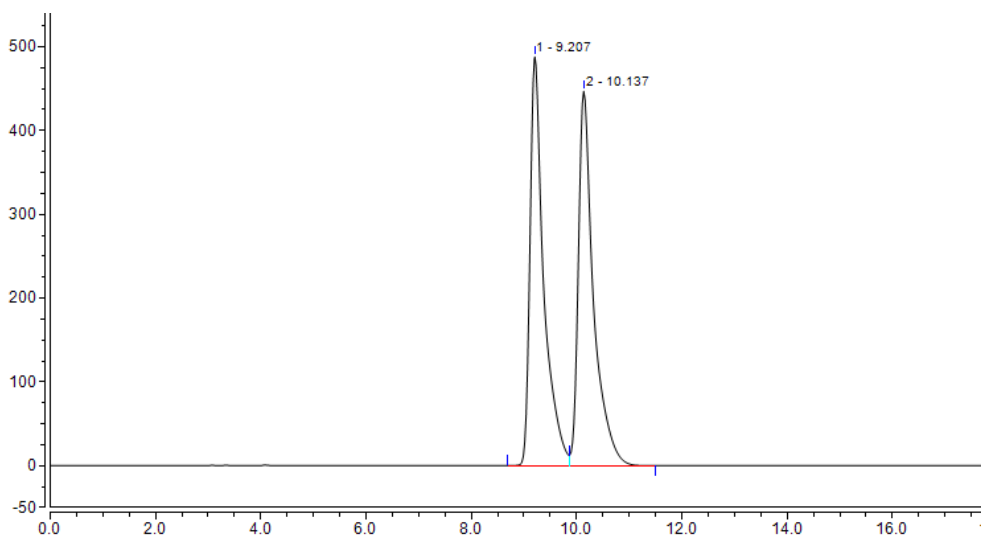

| Peak | Ret. Time (min) | Area (mAu*min) | Height (mAu) | Area % | Height % |
|------|-----------------|----------------|--------------|--------|----------|
| 1    | 9.207           | 147.705        | 487.987      | 49.81  | 52.18    |
| 2    | 10.137          | 148.807        | 447.199      | 50.19  | 47.82    |

**Supplementary Fig. 171. HPLC spectrum of racemic (*P, E*)-3h**

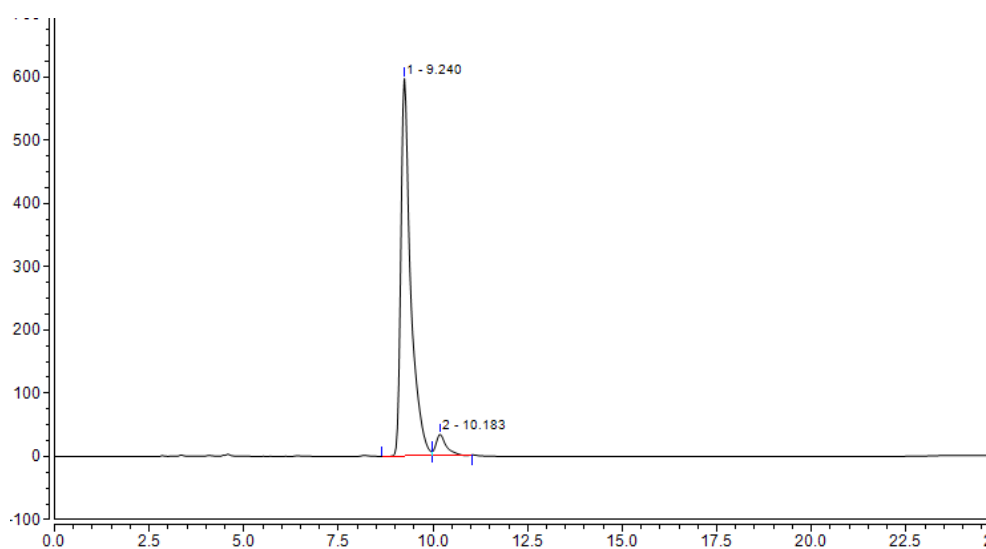

| Peak | Ret. Time (min) | Area (mAu*min) | Height (mAu) | Area % | Height % |
|------|-----------------|----------------|--------------|--------|----------|
| 1    | 9.240           | 179.460        | 596.965      | 94.58  | 94.70    |
| 2    | 10.183          | 10.284         | 33.430       | 5.42   | 5.30     |

**Supplementary Fig. 172. HPLC spectrum of chiral (*P, E*)-3h**

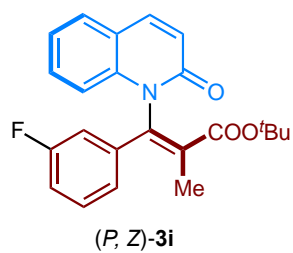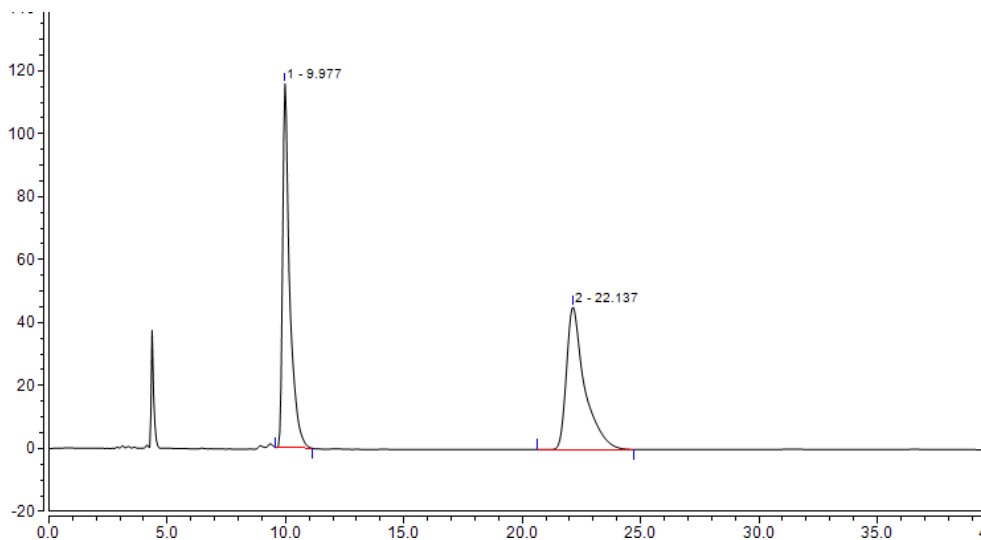

| Peak | Ret. Time (min) | Area (mAu*min) | Height (mAu) | Area % | Height % |
|------|-----------------|----------------|--------------|--------|----------|
| 1    | 9.977           | 39.974         | 115.633      | 49.96  | 71.84    |
| 2    | 22.137          | 40.034         | 45.330       | 50.04  | 28.16    |

**Supplementary Fig. 173. HPLC spectrum of racemic (*P, Z*)-3i**

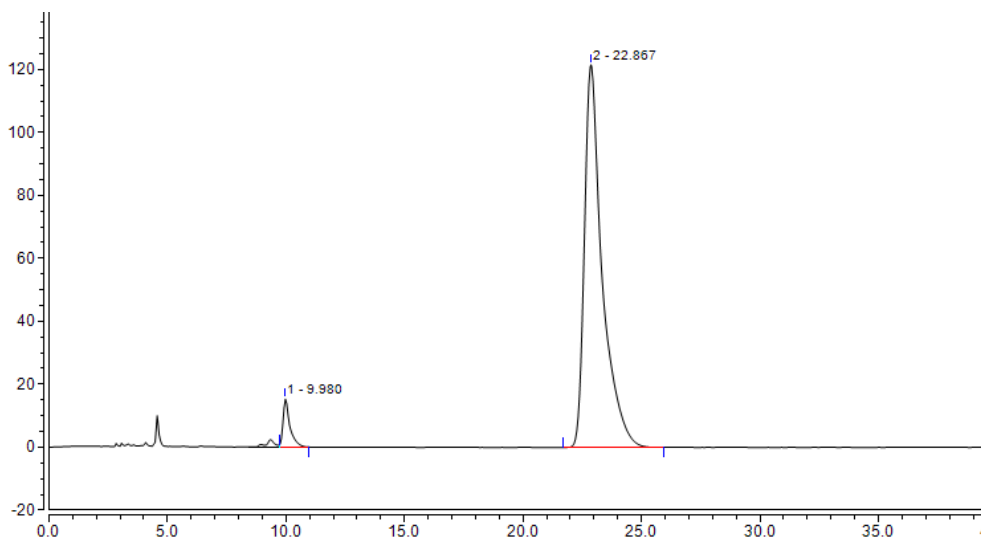

| Peak | Ret. Time (min) | Area (mAu*min) | Height (mAu) | Area % | Height % |
|------|-----------------|----------------|--------------|--------|----------|
| 1    | 9.980           | 5.114          | 15.286       | 4.62   | 11.17    |
| 2    | 22.867          | 105.515        | 121.589      | 95.38  | 88.83    |

**Supplementary Fig. 174. HPLC spectrum of chiral (*P, Z*)-3i**

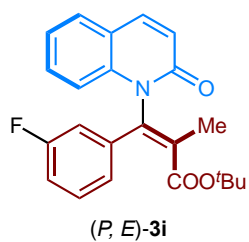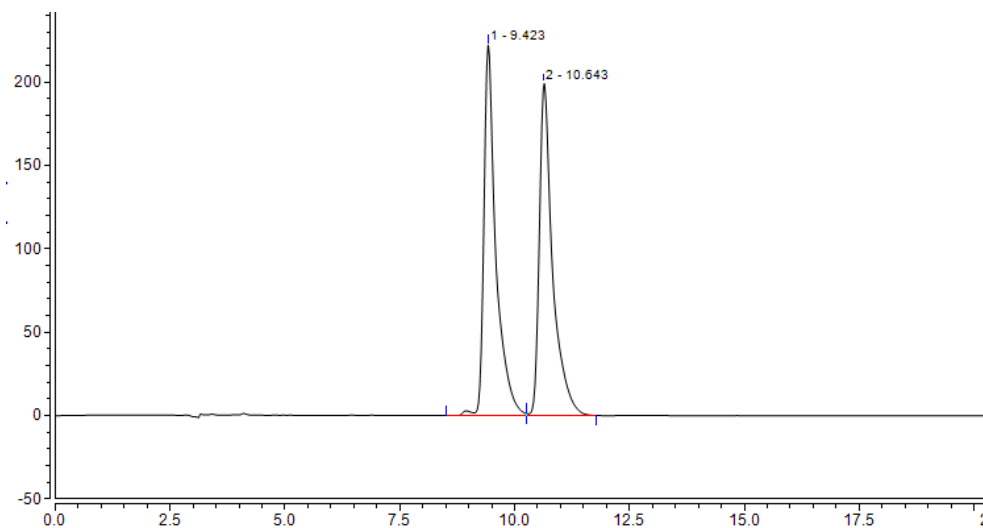

| Peak | Ret. Time (min) | Area (mAu*min) | Height (mAu) | Area % | Height % |
|------|-----------------|----------------|--------------|--------|----------|
| 1    | 9.423           | 67.315         | 222.136      | 50.25  | 52.74    |
| 2    | 10.643          | 66.634         | 199.079      | 49.75  | 47.26    |

**Supplementary Fig. 175. HPLC spectrum of racemic (*P, E*)-3i**

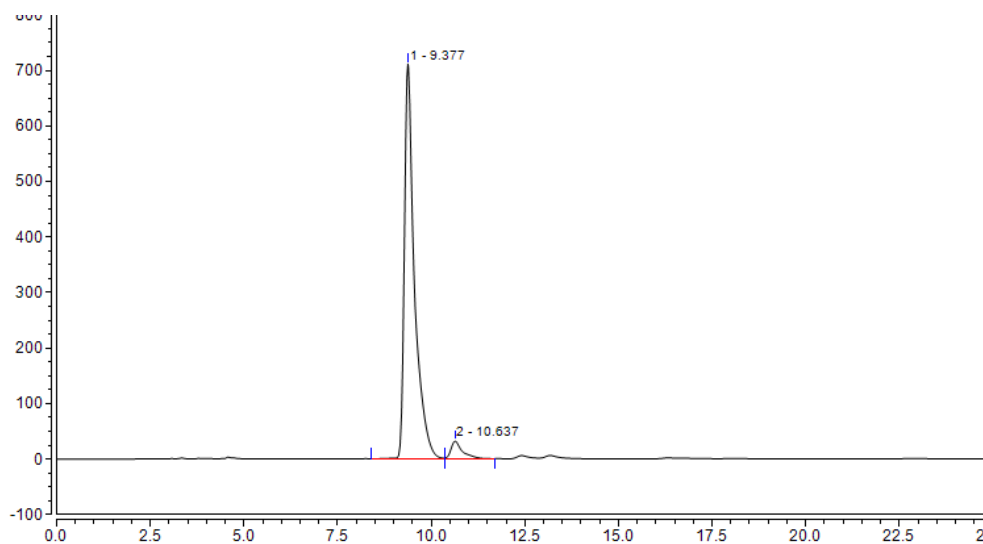

| Peak | Ret. Time (min) | Area (mAu*min) | Height (mAu) | Area % | Height % |
|------|-----------------|----------------|--------------|--------|----------|
| 1    | 9.377           | 221.284        | 710.755      | 95.17  | 95.72    |
| 2    | 10.637          | 11.219         | 31.813       | 4.83   | 4.28     |

**Supplementary Fig. 176. HPLC spectrum of chiral (*P, E*)-3i**

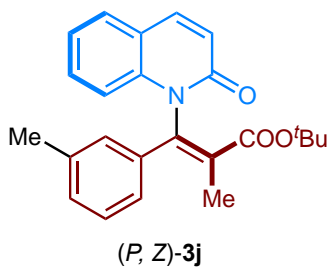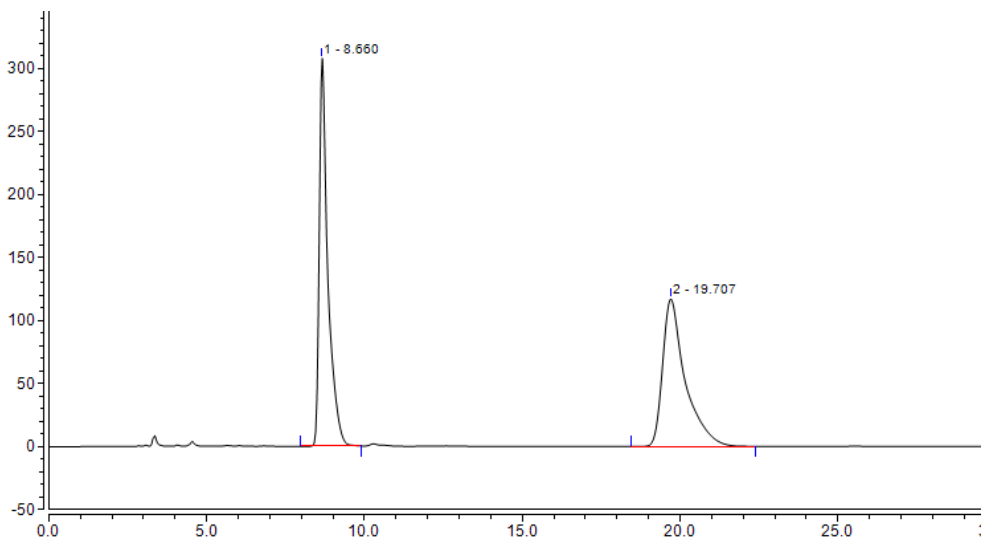

| Peak | Ret. Time (min) | Area (mAu*min) | Height (mAu) | Area % | Height % |
|------|-----------------|----------------|--------------|--------|----------|
| 1    | 8.660           | 97.210         | 307.736      | 50.17  | 72.45    |
| 2    | 19.707          | 96.540         | 116.996      | 49.83  | 27.55    |

**Supplementary Fig. 177. HPLC spectrum of racemic (P, Z)-3j**

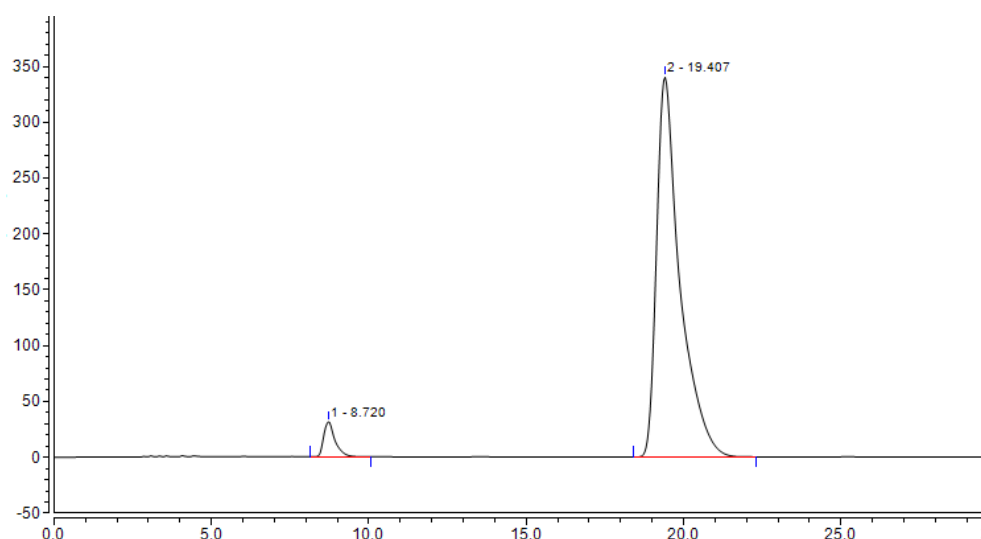

| Peak | Ret. Time (min) | Area (mAu*min) | Height (mAu) | Area % | Height % |
|------|-----------------|----------------|--------------|--------|----------|
| 1    | 8.720           | 13.074         | 31.467       | 4.28   | 8.47     |
| 2    | 19.407          | 292.194        | 340.148      | 95.72  | 91.53    |

**Supplementary Fig. 178. HPLC spectrum of chiral (P, Z)-3j**

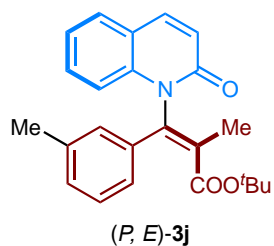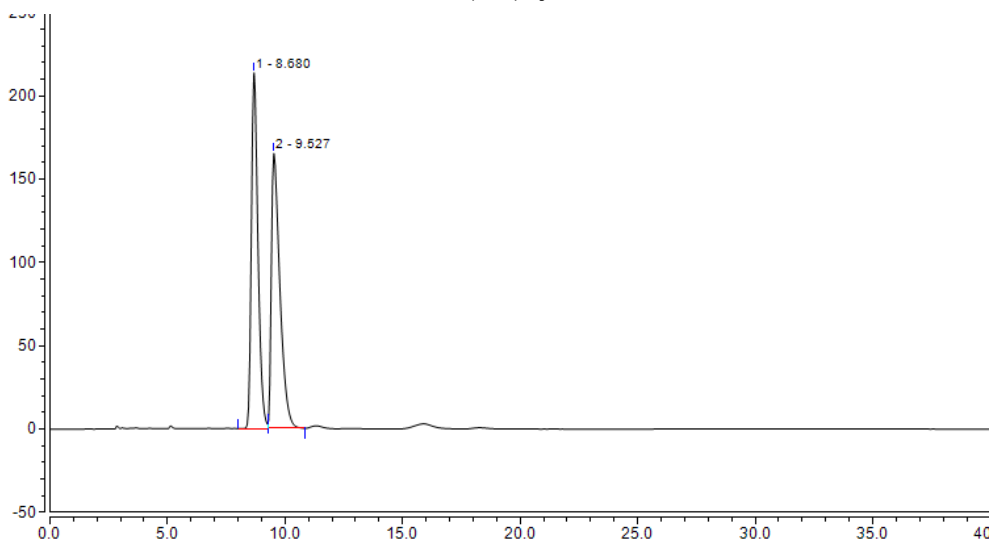

| Peak | Ret. Time (min) | Area (mAu*min) | Height (mAu) | Area % | Height % |
|------|-----------------|----------------|--------------|--------|----------|
| 1    | 8.680           | 69.288         | 213.562      | 49.85  | 56.40    |
| 2    | 9.527           | 69.712         | 165.115      | 50.15  | 43.60    |

**Supplementary Fig. 179. HPLC spectrum of racemic (*P, E*)-3j**

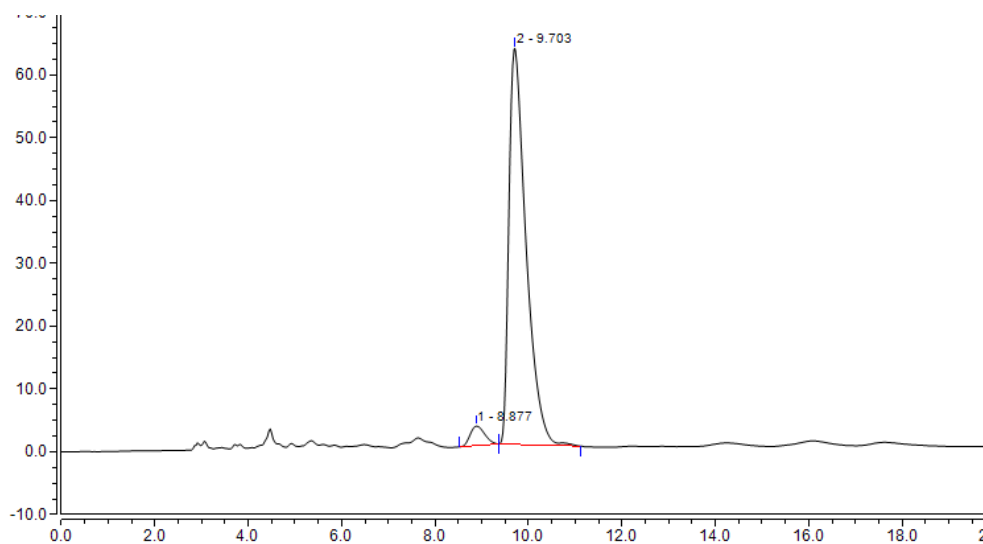

| Peak | Ret. Time (min) | Area (mAu*min) | Height (mAu) | Area % | Height % |
|------|-----------------|----------------|--------------|--------|----------|
| 1    | 8.877           | 1.128          | 3.121        | 4.04   | 4.71     |
| 2    | 9.703           | 26.836         | 63.109       | 95.96  | 95.29    |

**Supplementary Fig. 180. HPLC spectrum of chiral (*P, E*)-3j**

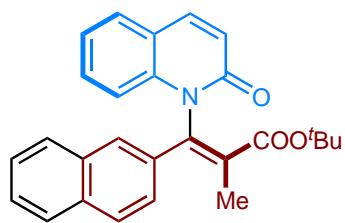

(*P, Z*)-**3k**

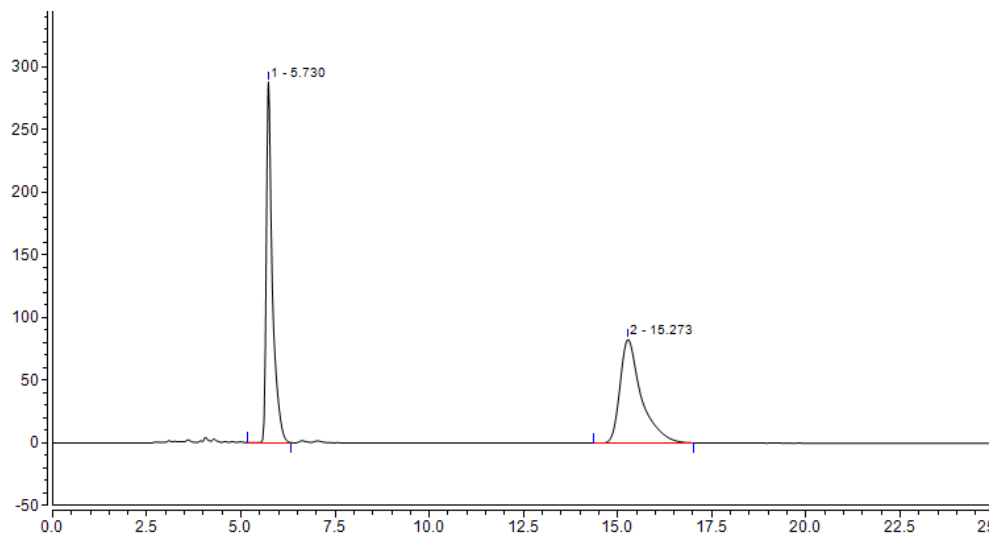

| Peak | Ret. Time (min) | Area (mAu*min) | Height (mAu) | Area % | Height % |
|------|-----------------|----------------|--------------|--------|----------|
| 1    | 5.730           | 54.082         | 287.847      | 50.05  | 77.68    |
| 2    | 15.273          | 53.977         | 82.730       | 49.95  | 22.32    |

**Supplementary Fig. 181. HPLC spectrum of racemic (*P, Z*)-**3k****

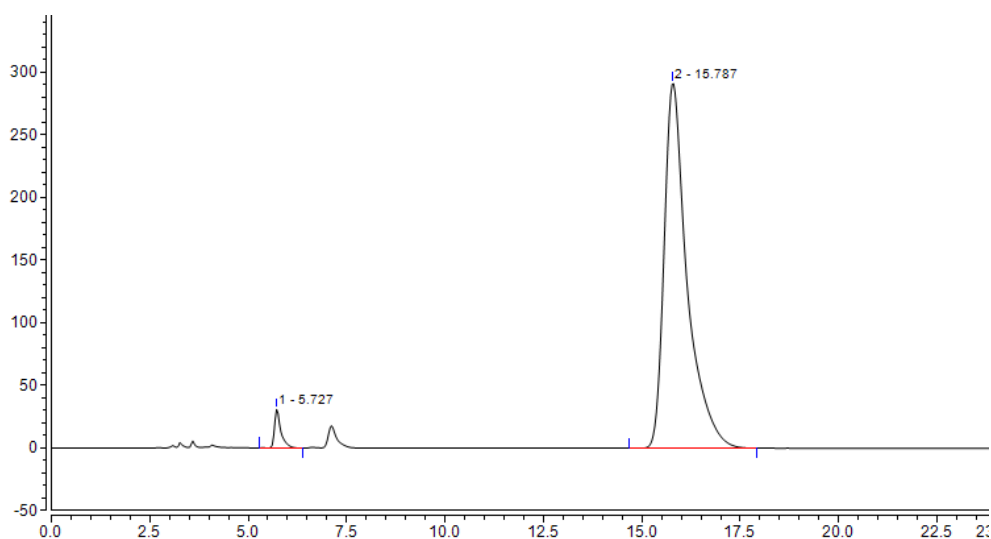

| Peak | Ret. Time (min) | Area (mAu*min) | Height (mAu) | Area % | Height % |
|------|-----------------|----------------|--------------|--------|----------|
| 1    | 5.727           | 5.781          | 31.100       | 2.85   | 9.63     |
| 2    | 15.787          | 196.861        | 291.727      | 97.15  | 90.37    |

**Supplementary Fig. 182. HPLC spectrum of chiral (*P, Z*)-**3k****



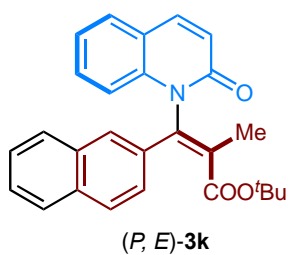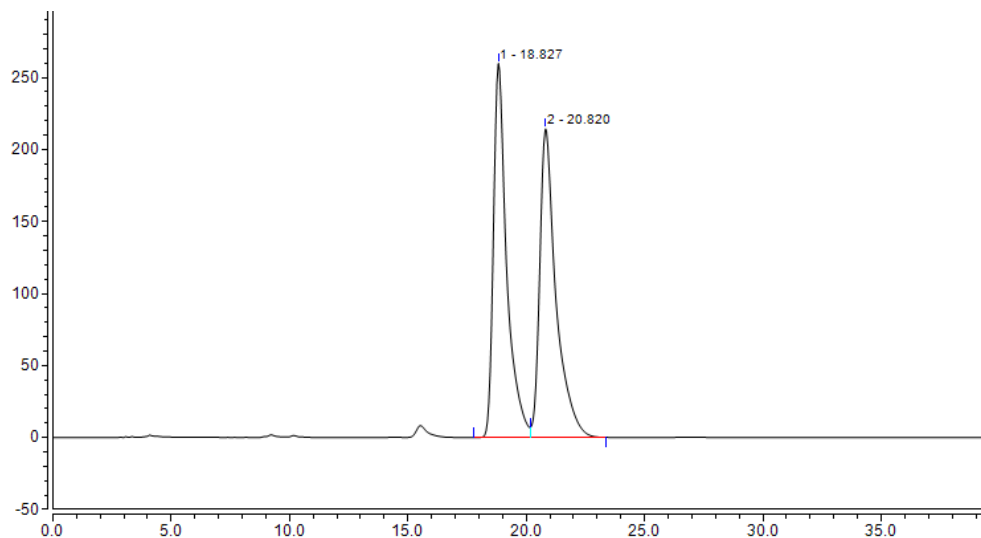

| Peak | Ret. Time (min) | Area (mAu*min) | Height (mAu) | Area % | Height % |
|------|-----------------|----------------|--------------|--------|----------|
| 1    | 18.827          | 168.727        | 259.878      | 49.72  | 54.80    |
| 2    | 20.820          | 170.626        | 214.337      | 50.28  | 45.20    |

**Supplementary Fig. 183. HPLC spectrum of racemic (*P, E*)-**3k****

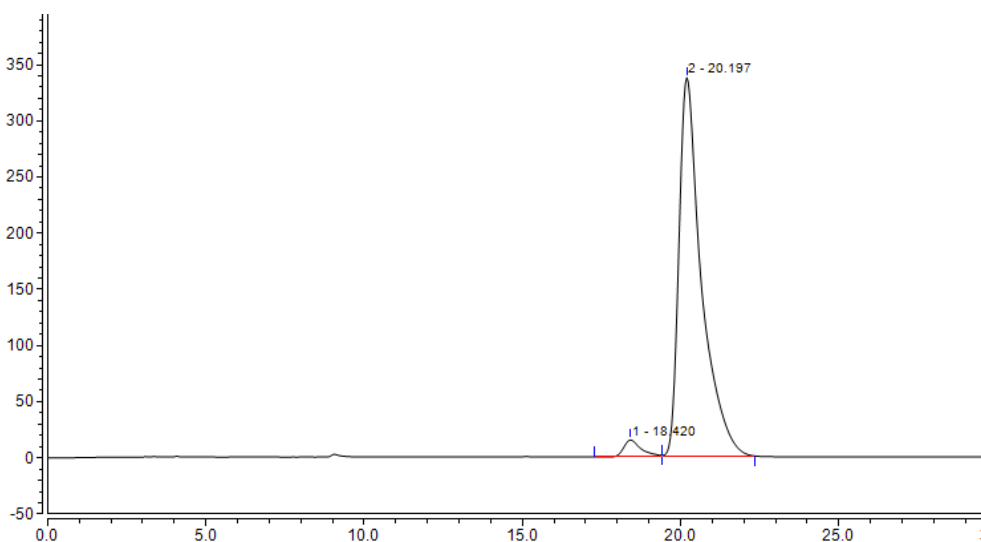

| Peak | Ret. Time (min) | Area (mAu*min) | Height (mAu) | Area % | Height % |
|------|-----------------|----------------|--------------|--------|----------|
| 1    | 18.420          | 9.492          | 14.925       | 3.31   | 4.24     |
| 2    | 20.197          | 277.630        | 337.287      | 96.69  | 95.76    |

**Supplementary Fig. 184. HPLC spectrum of chiral (*P, E*)-**3k****

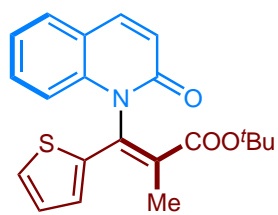

(*P, Z*)-31

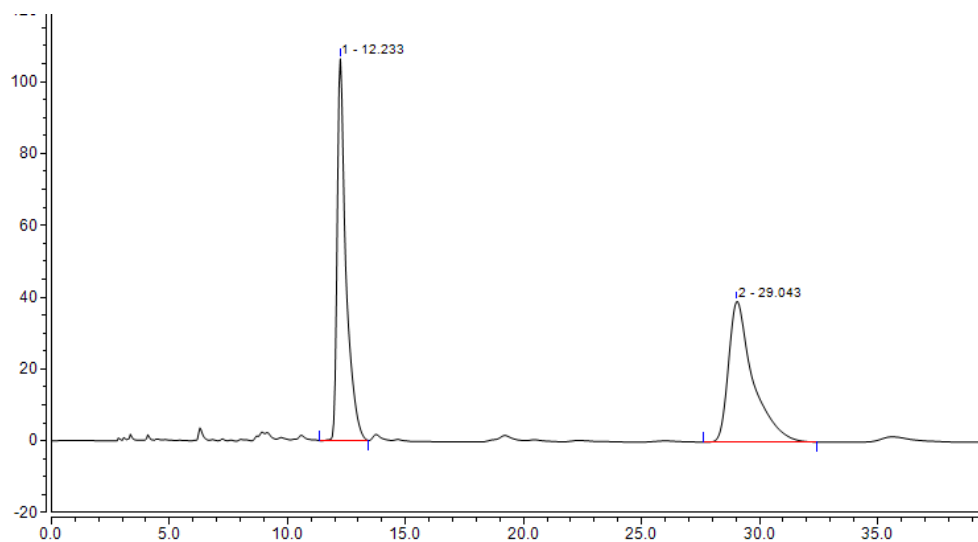

| Peak | Ret. Time (min) | Area (mAu*min) | Height (mAu) | Area % | Height % |
|------|-----------------|----------------|--------------|--------|----------|
| 1    | 12.233          | 45.878         | 106.339      | 49.46  | 73.07    |
| 2    | 29.043          | 46.876         | 39.191       | 50.54  | 26.93    |

**Supplementary Fig. 185. HPLC spectrum of racemic (*P, Z*)-31**

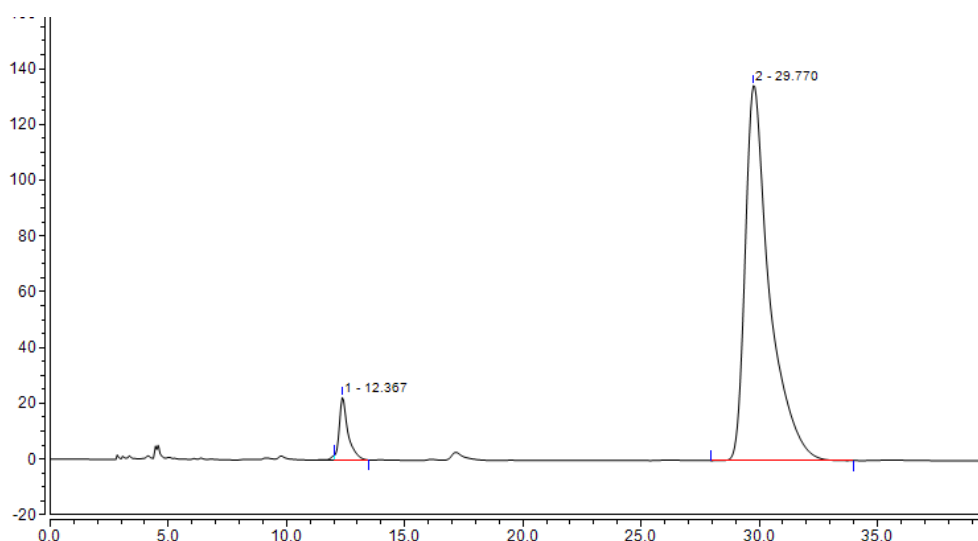

| Peak | Ret. Time (min) | Area (mAu*min) | Height (mAu) | Area % | Height % |
|------|-----------------|----------------|--------------|--------|----------|
| 1    | 12.367          | 9.583          | 22.538       | 5.65   | 14.34    |
| 2    | 29.770          | 159.962        | 134.669      | 94.35  | 85.66    |

**Supplementary Fig. 186. HPLC spectrum of chiral (*P, Z*)-31**

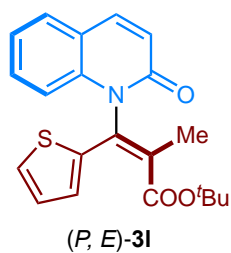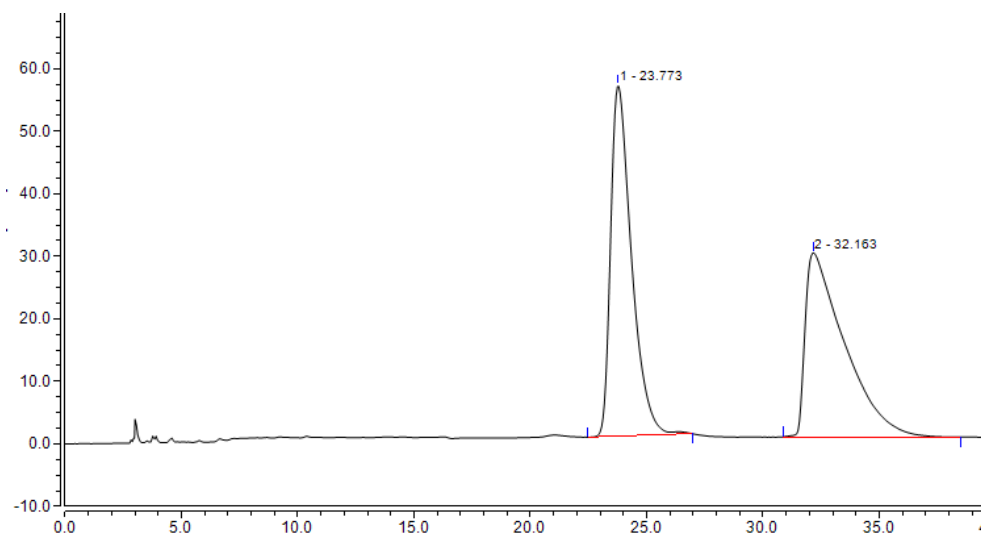

| Peak | Ret. Time (min) | Area (mAu*min) | Height (mAu) | Area % | Height % |
|------|-----------------|----------------|--------------|--------|----------|
| 1    | 23.773          | 58.435         | 56.102       | 50.32  | 65.58    |
| 2    | 32.163          | 57.689         | 29.451       | 49.68  | 34.42    |

**Supplementary Fig. 187. HPLC spectrum of racemic (*P, E*)-31**

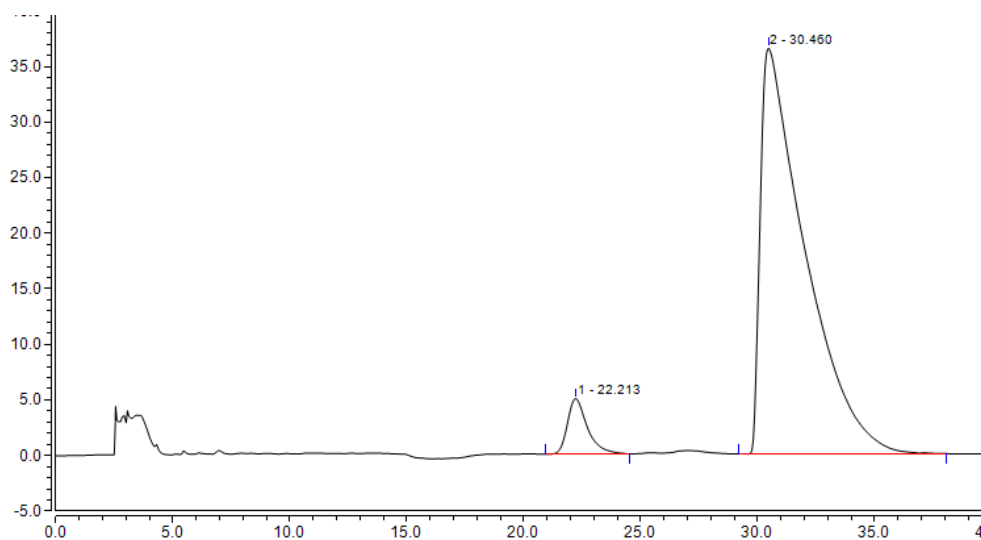

| Peak | Ret. Time (min) | Area (mAu*min) | Height (mAu) | Area % | Height % |
|------|-----------------|----------------|--------------|--------|----------|
| 1    | 22.213          | 4.911          | 4.987        | 5.73   | 12.02    |
| 2    | 30.460          | 80.792         | 36.489       | 94.27  | 87.98    |

**Supplementary Fig. 188. HPLC spectrum of chiral (*P, E*)-31**

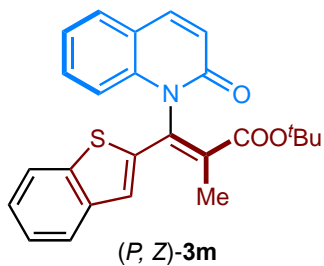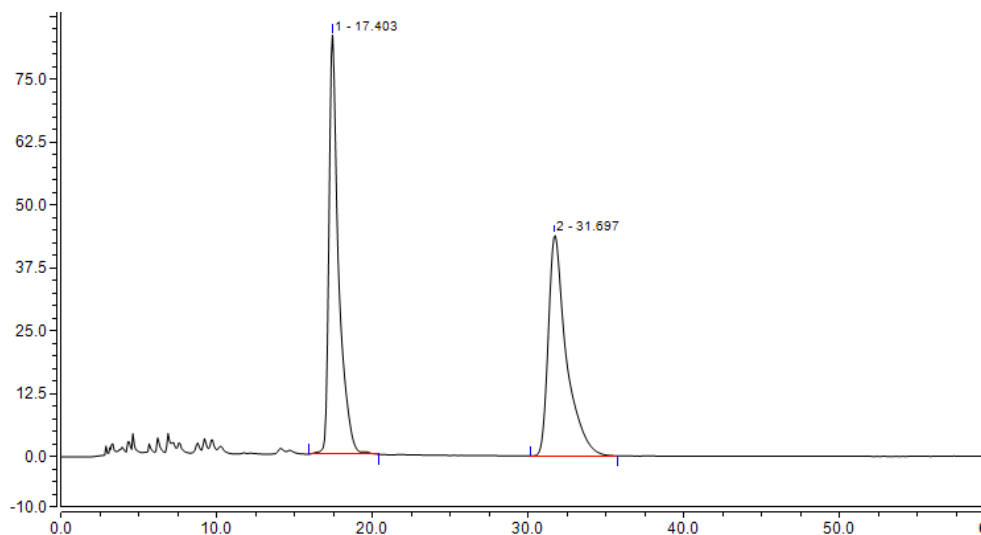

| Peak | Ret. Time (min) | Area (mAu*min) | Height (mAu) | Area % | Height % |
|------|-----------------|----------------|--------------|--------|----------|
| 1    | 17.403          | 59.772         | 83.299       | 50.50  | 65.49    |
| 2    | 31.697          | 58.579         | 43.895       | 49.50  | 34.51    |

**Supplementary Fig. 189. HPLC spectrum of racemic (*P, Z*)-3m**

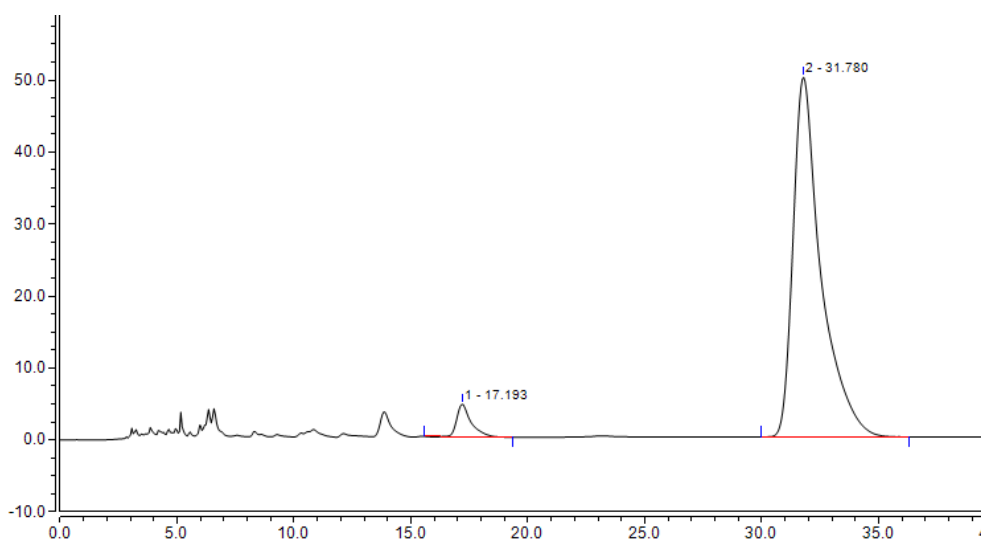

| Peak | Ret. Time (min) | Area (mAu*min) | Height (mAu) | Area % | Height % |
|------|-----------------|----------------|--------------|--------|----------|
| 1    | 17.193          | 3.127          | 4.523        | 4.32   | 8.30     |
| 2    | 31.780          | 69.203         | 49.999       | 95.68  | 91.70    |

**Supplementary Fig. 190. HPLC spectrum of chiral (*P, Z*)-3m**

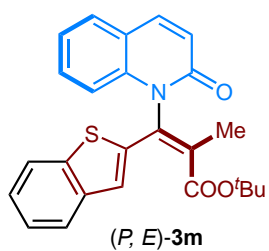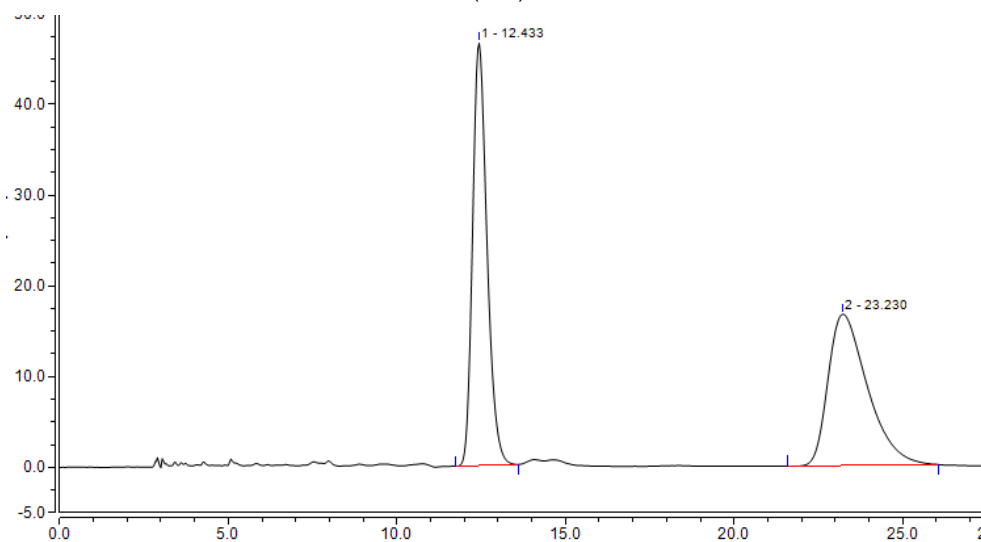

| Peak | Ret. Time (min) | Area (mAu*min) | Height (mAu) | Area % | Height % |
|------|-----------------|----------------|--------------|--------|----------|
| 1    | 12.433          | 23.124         | 46.586       | 50.63  | 73.62    |
| 2    | 23.230          | 22.552         | 16.692       | 49.37  | 26.38    |

**Supplementary Fig. 191. HPLC spectrum of racemic (*P, E*)-3m**

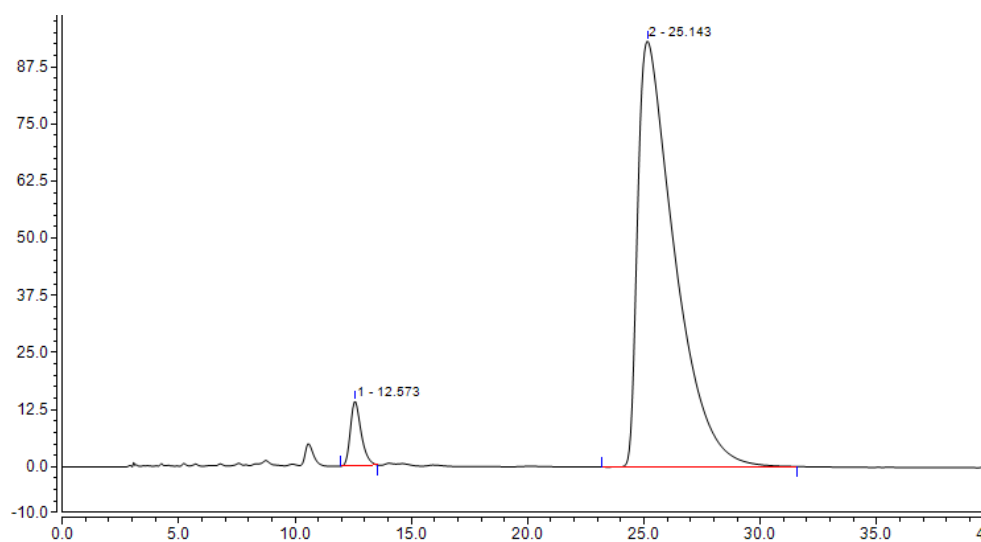

| Peak | Ret. Time (min) | Area (mAu*min) | Height (mAu) | Area % | Height % |
|------|-----------------|----------------|--------------|--------|----------|
| 1    | 12.573          | 7.606          | 14.100       | 4.26   | 13.15    |
| 2    | 25.143          | 170.881        | 93.141       | 95.74  | 86.85    |

**Supplementary Fig. 192. HPLC spectrum of chiral (*P, E*)-3m**

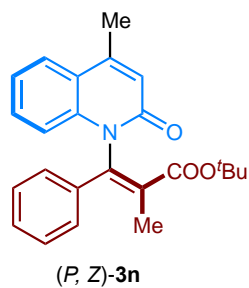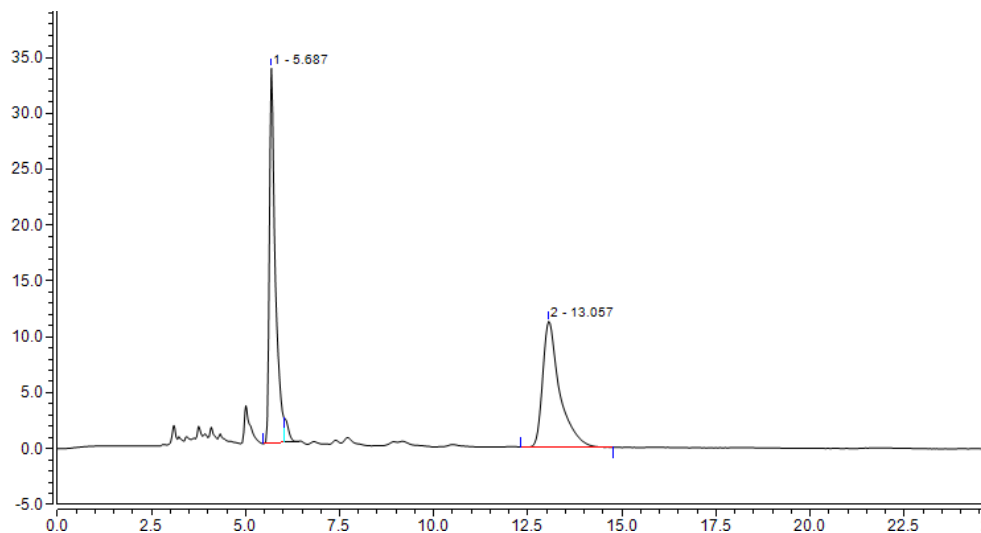

| Peak | Ret. Time (min) | Area (mAu*min) | Height (mAu) | Area % | Height % |
|------|-----------------|----------------|--------------|--------|----------|
| 1    | 5.687           | 6.071          | 33.540       | 50.90  | 74.88    |
| 2    | 13.057          | 5.856          | 11.252       | 49.10  | 25.12    |

**Supplementary Fig. 193. HPLC spectrum of racemic (*P, Z*)-**3n****

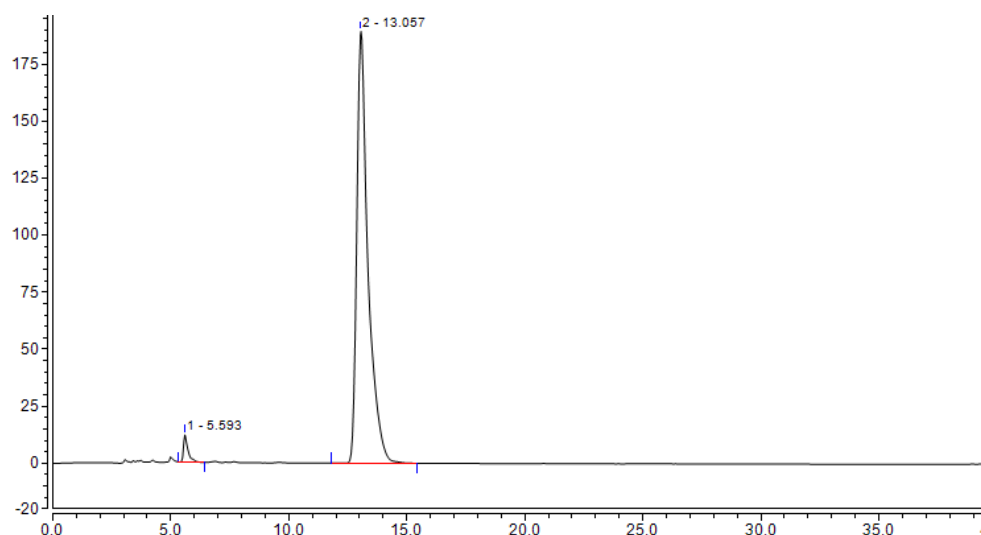

| Peak | Ret. Time (min) | Area (mAu*min) | Height (mAu) | Area % | Height % |
|------|-----------------|----------------|--------------|--------|----------|
| 1    | 5.593           | 2.523          | 11.866       | 2.36   | 5.90     |
| 2    | 13.057          | 104.407        | 189.253      | 97.64  | 94.10    |

**Supplementary Fig. 194. HPLC spectrum of chiral (*P, Z*)-**3n****

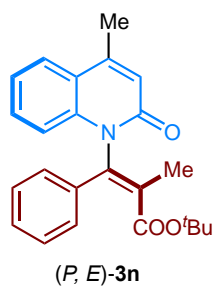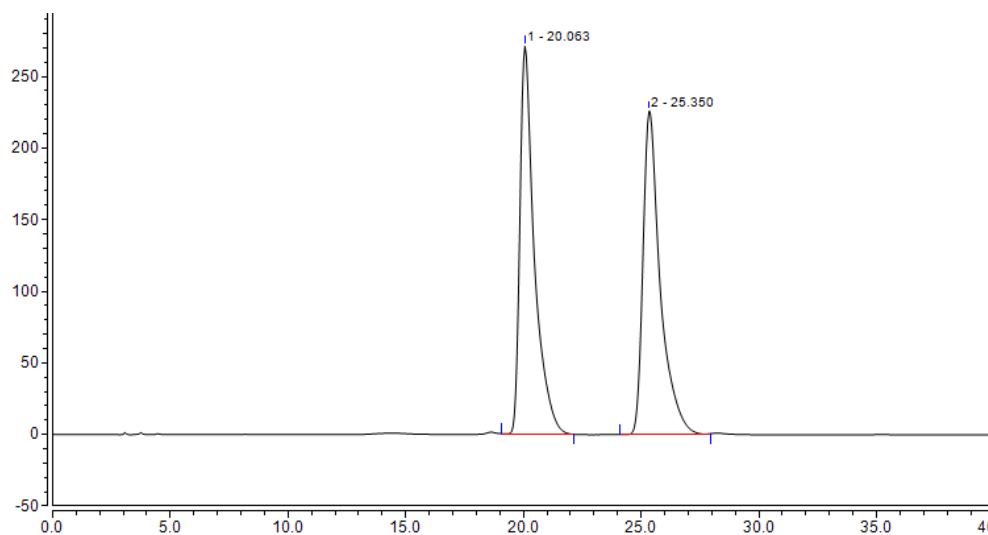

| Peak | Ret. Time (min) | Area (mAu*min) | Height (mAu) | Area % | Height % |
|------|-----------------|----------------|--------------|--------|----------|
| 1    | 20.063          | 192.378        | 270.858      | 50.20  | 54.52    |
| 2    | 25.350          | 190.850        | 225.973      | 49.80  | 45.48    |

**Supplementary Fig. 195. HPLC spectrum of racemic (*P, E*)-3n**

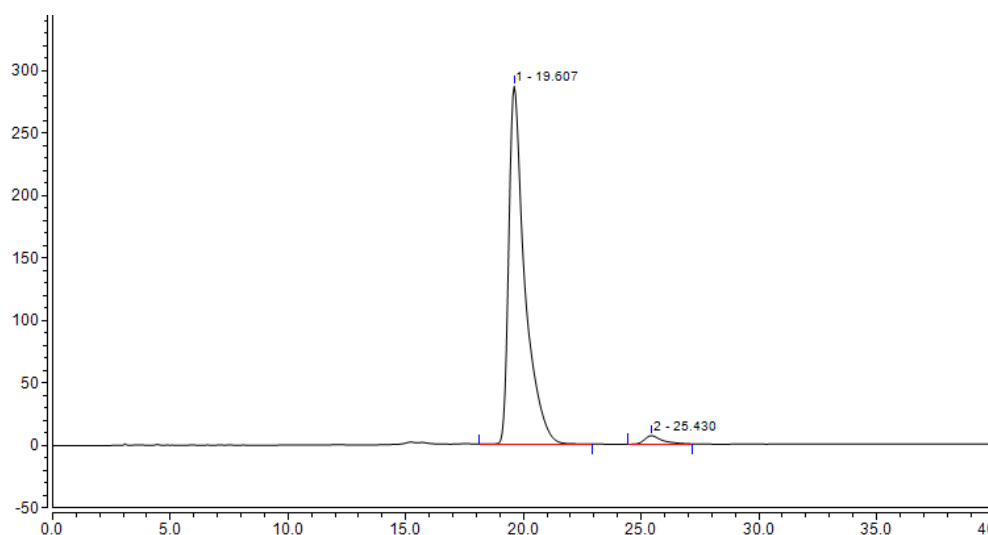

| Peak | Ret. Time (min) | Area (mAu*min) | Height (mAu) | Area % | Height % |
|------|-----------------|----------------|--------------|--------|----------|
| 1    | 19.607          | 225.139        | 286.438      | 97.48  | 97.69    |
| 2    | 25.430          | 5.817          | 6.762        | 2.52   | 2.31     |

**Supplementary Fig. 196. HPLC spectrum of chiral (*P, E*)-3n**

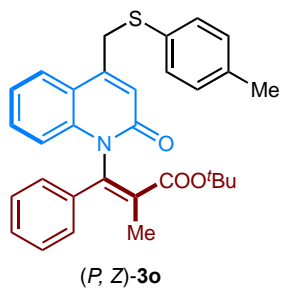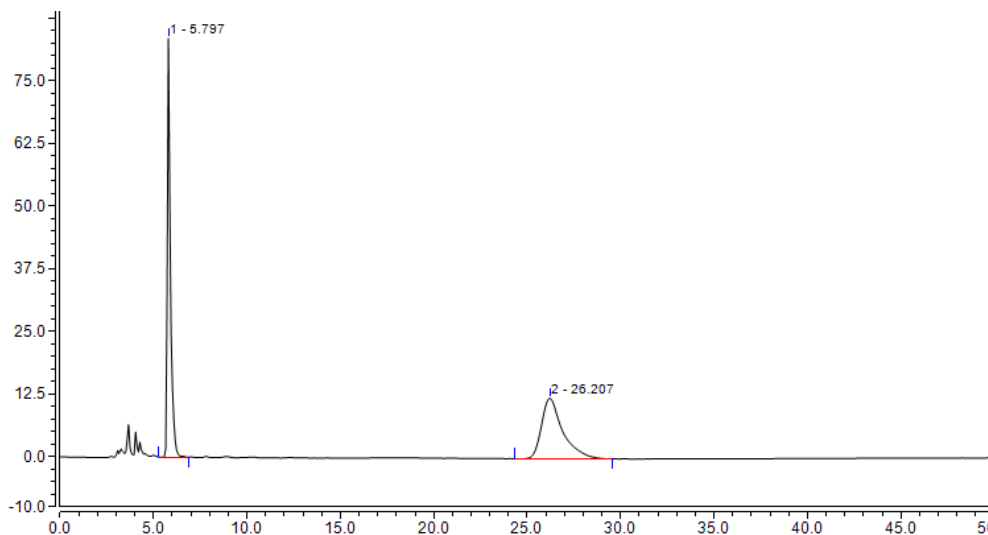

| Peak | Ret. Time (min) | Area (mAu*min) | Height (mAu) | Area % | Height % |
|------|-----------------|----------------|--------------|--------|----------|
| 1    | 5.797           | 16.055         | 83.499       | 50.31  | 87.36    |
| 2    | 26.207          | 15.860         | 12.079       | 49.69  | 12.64    |

**Supplementary Fig. 197. HPLC spectrum of racemic (*P, Z*)-**3o****

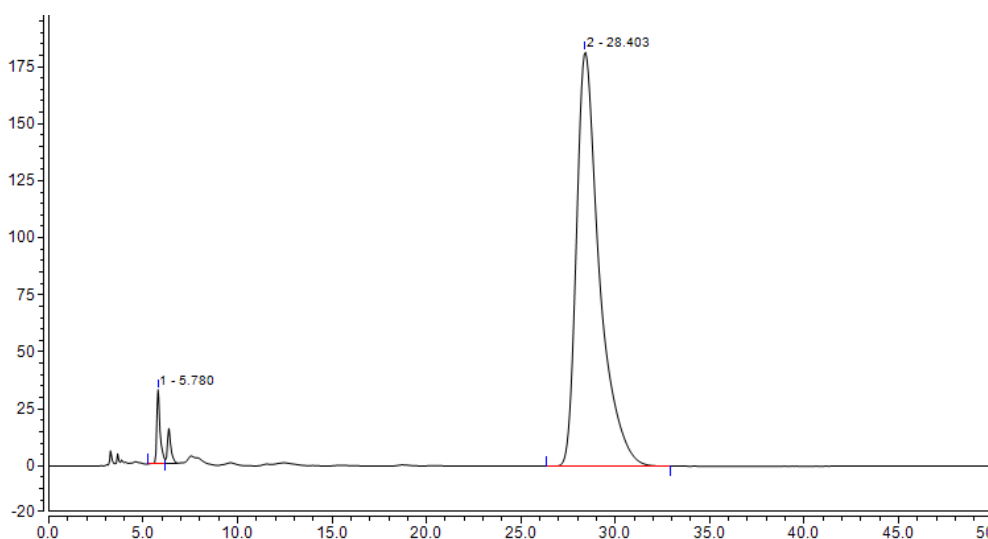

| Peak | Ret. Time (min) | Area (mAu*min) | Height (mAu) | Area % | Height % |
|------|-----------------|----------------|--------------|--------|----------|
| 1    | 5.780           | 6.406          | 32.456       | 2.45   | 15.17    |
| 2    | 28.403          | 254.795        | 181.489      | 97.55  | 84.83    |

**Supplementary Fig. 198. HPLC spectrum of chiral (*P, Z*)-**3o****



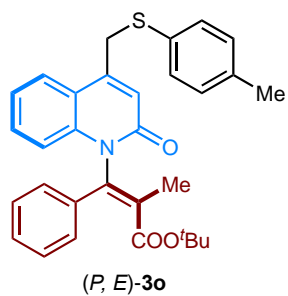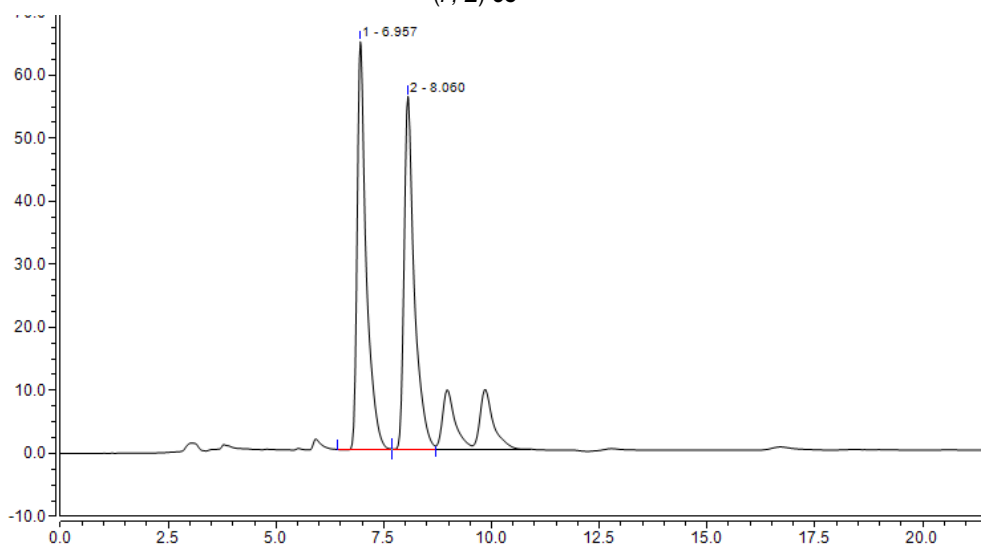

| Peak | Ret. Time (min) | Area (mAu*min) | Height (mAu) | Area % | Height % |
|------|-----------------|----------------|--------------|--------|----------|
| 1    | 6.957           | 15.791         | 64.686       | 50.65  | 53.59    |
| 2    | 8.060           | 15.385         | 56.013       | 49.35  | 46.41    |

**Supplementary Fig. 199. HPLC spectrum of racemic (*P, E*)-3o**

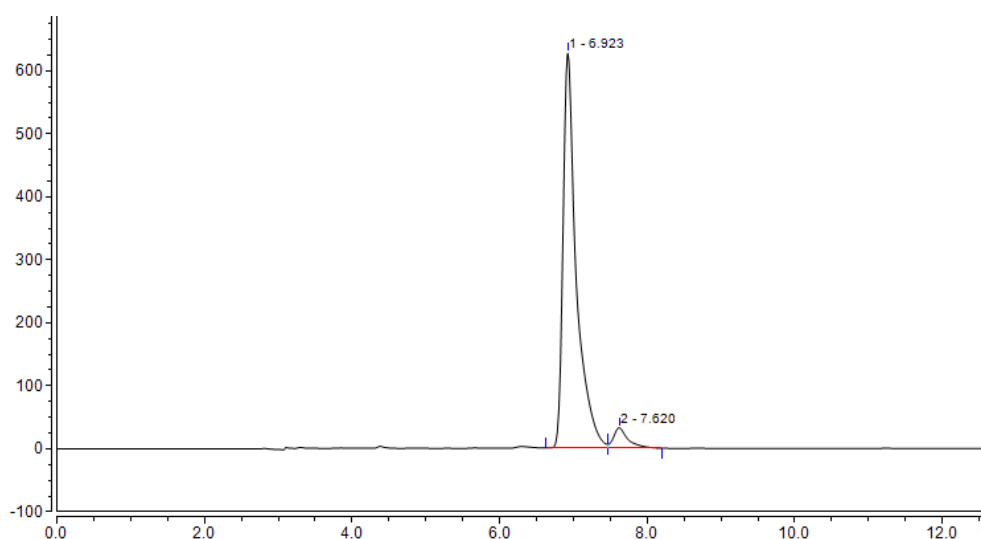

| Peak | Ret. Time (min) | Area (mAu*min) | Height (mAu) | Area % | Height % |
|------|-----------------|----------------|--------------|--------|----------|
| 1    | 6.923           | 130.420        | 626.871      | 94.65  | 95.08    |
| 2    | 7.620           | 7.372          | 32.456       | 5.35   | 4.92     |

**Supplementary Fig. 200. HPLC spectrum of chiral (*P, E*)-3o**

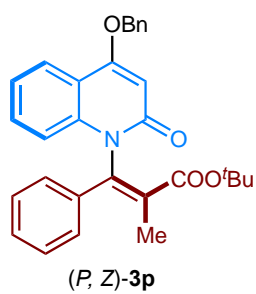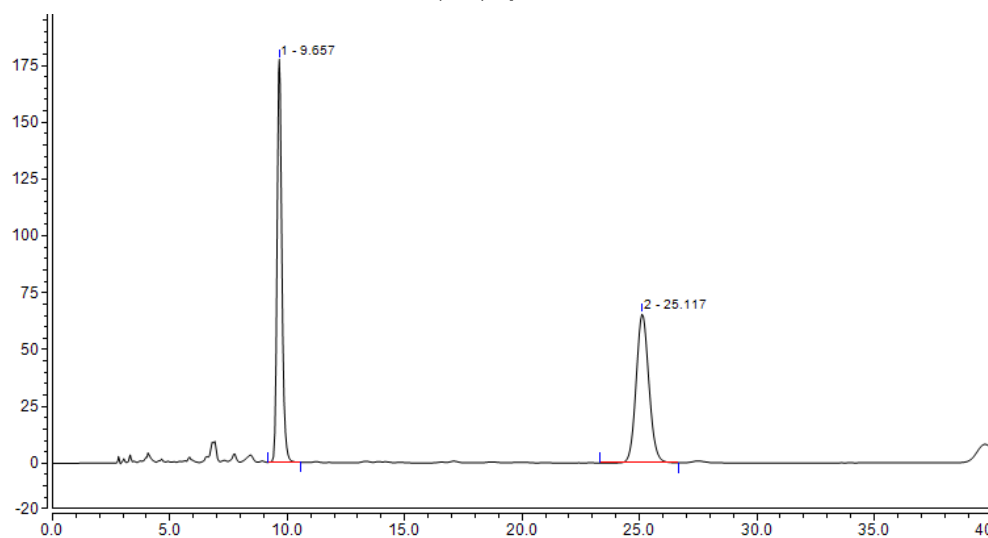

| Peak | Ret. Time (min) | Area (mAu*min) | Height (mAu) | Area % | Height % |
|------|-----------------|----------------|--------------|--------|----------|
| 1    | 9.657           | 41.801         | 177.306      | 50.39  | 73.02    |
| 2    | 25.117          | 41.158         | 65.514       | 49.61  | 26.98    |

**Supplementary Fig. 201. HPLC spectrum of racemic (P, Z)-3p**

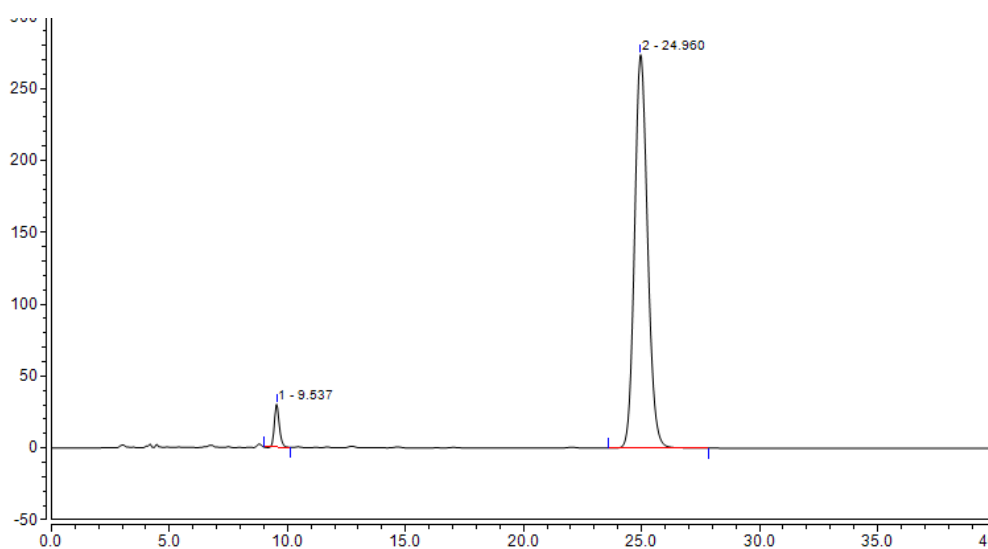

| Peak | Ret. Time (min) | Area (mAu*min) | Height (mAu) | Area % | Height % |
|------|-----------------|----------------|--------------|--------|----------|
| 1    | 9.537           | 5.387          | 29.945       | 2.96   | 9.86     |
| 2    | 24.960          | 176.613        | 273.706      | 97.04  | 90.14    |

**Supplementary Fig. 202. HPLC spectrum of chiral (P, Z)-3p**

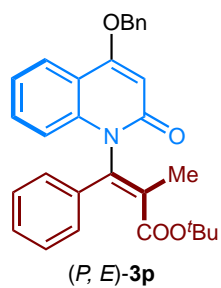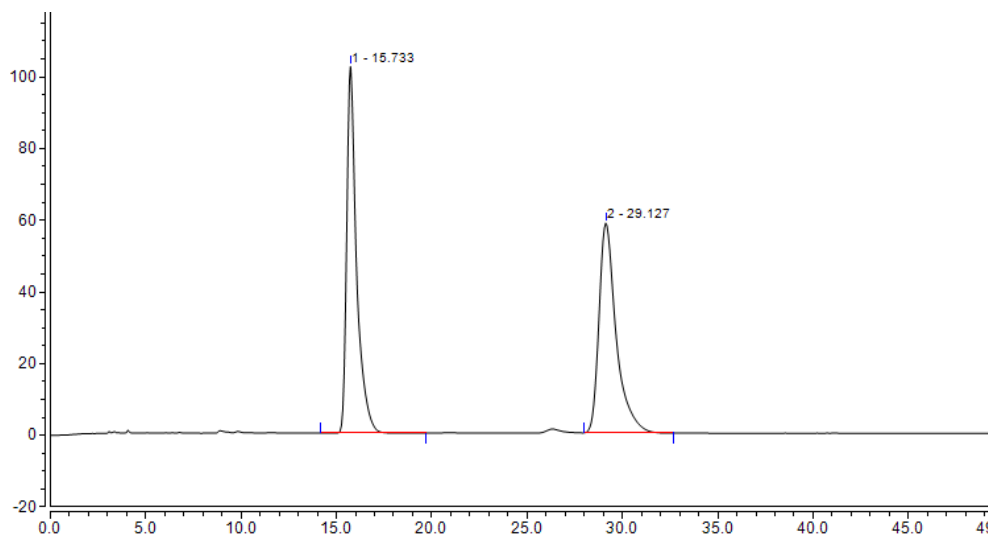

| Peak | Ret. Time (min) | Area (mAu*min) | Height (mAu) | Area % | Height % |
|------|-----------------|----------------|--------------|--------|----------|
| 1    | 15.733          | 61.270         | 102.319      | 50.07  | 63.59    |
| 2    | 29.127          | 61.092         | 58.578       | 49.93  | 36.41    |

**Supplementary Fig. 203. HPLC spectrum of racemic (P, E)-3p**

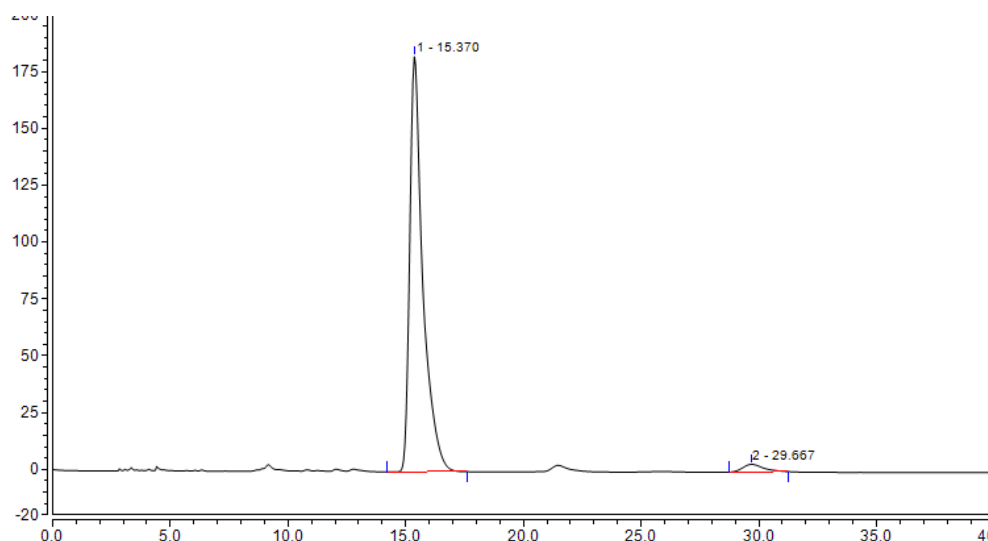

| Peak | Ret. Time (min) | Area (mAu*min) | Height (mAu) | Area % | Height % |
|------|-----------------|----------------|--------------|--------|----------|
| 1    | 15.370          | 117.912        | 182.505      | 97.19  | 98.19    |
| 2    | 29.667          | 3.405          | 3.360        | 2.81   | 1.81     |

**Supplementary Fig. 204. HPLC spectrum of chiral (P, E)-3p**

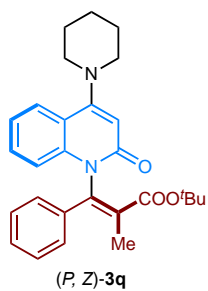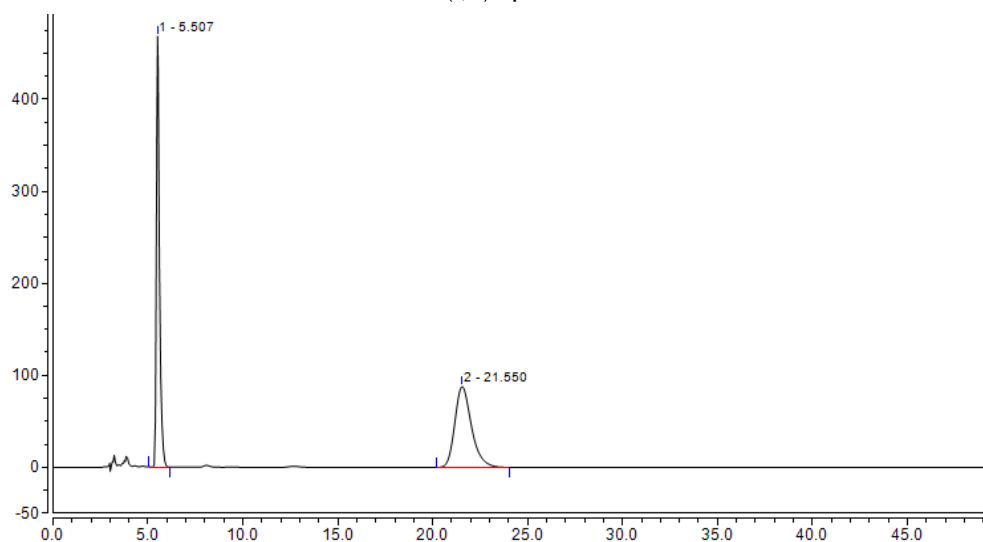

| Peak | Ret. Time (min) | Area (mAu*min) | Height (mAu) | Area % | Height % |
|------|-----------------|----------------|--------------|--------|----------|
| 1    | 5.507           | 87.134         | 468.026      | 49.31  | 84.18    |
| 2    | 21.550          | 89.557         | 87.971       | 50.69  | 15.82    |

**Supplementary Fig. 205. HPLC spectrum of racemic (*P, Z*)-3q**

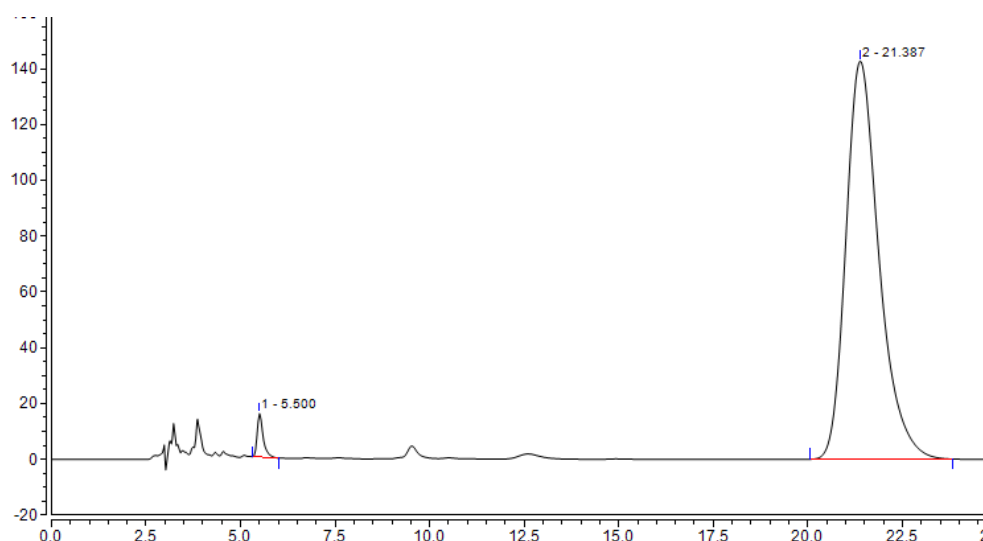

| Peak | Ret. Time (min) | Area (mAu*min) | Height (mAu) | Area % | Height % |
|------|-----------------|----------------|--------------|--------|----------|
| 1    | 5.500           | 2.851          | 15.642       | 1.93   | 9.88     |
| 2    | 21.387          | 144.886        | 142.672      | 98.07  | 90.12    |

**Supplementary Fig. 206. HPLC spectrum of chiral (*P, Z*)-3q**

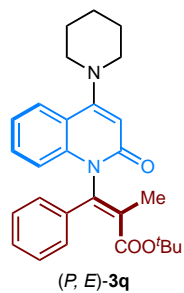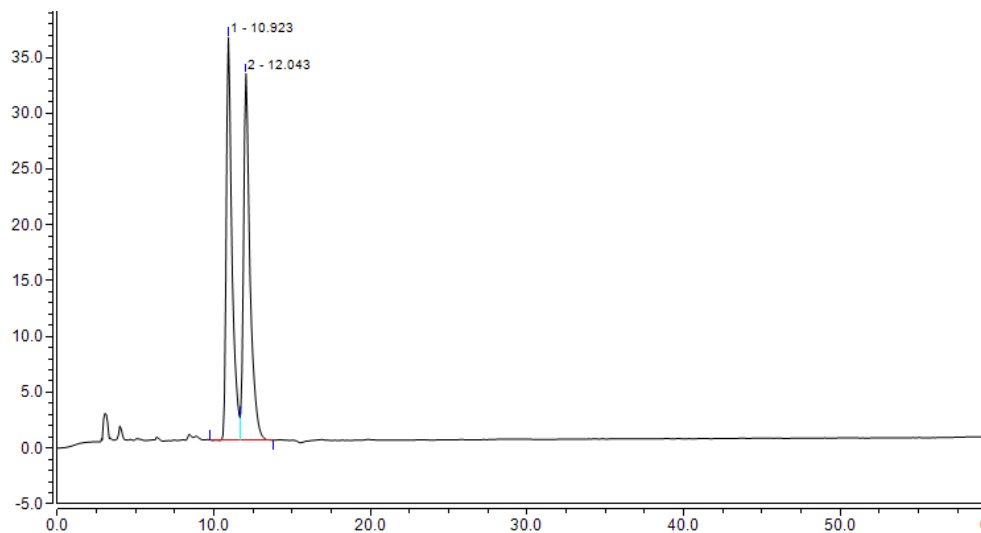

| Peak | Ret. Time (min) | Area (mAu*min) | Height (mAu) | Area % | Height % |
|------|-----------------|----------------|--------------|--------|----------|
| 1    | 10.923          | 15.182         | 36.065       | 49.14  | 52.35    |
| 2    | 12.043          | 15.714         | 32.831       | 50.86  | 47.65    |

**Supplementary Fig. 207. HPLC spectrum of racemic (*P, E*)-3q**

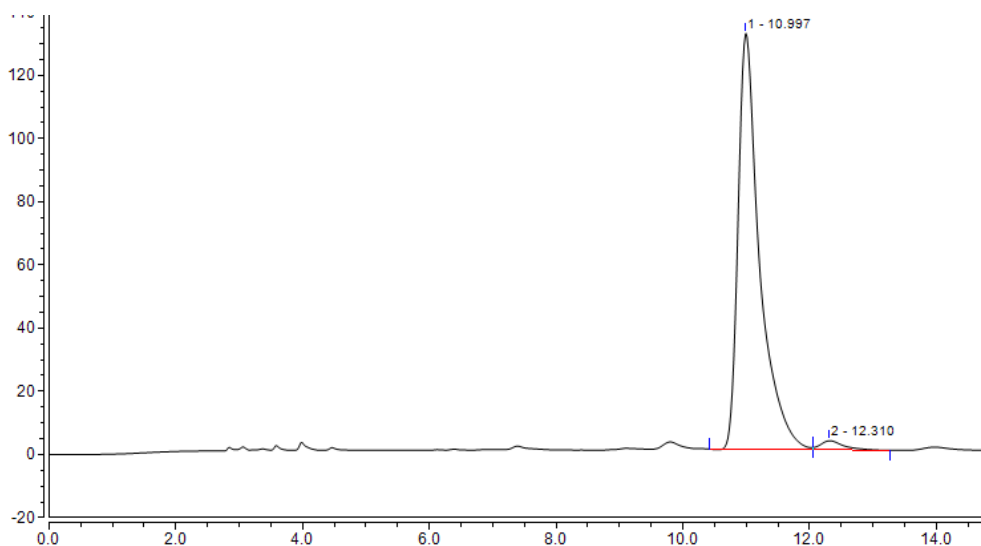

| Peak | Ret. Time (min) | Area (mAu*min) | Height (mAu) | Area % | Height % |
|------|-----------------|----------------|--------------|--------|----------|
| 1    | 10.997          | 51.810         | 131.666      | 97.64  | 97.83    |
| 2    | 12.310          | 1.255          | 2.917        | 2.36   | 2.17     |

**Supplementary Fig. 208. HPLC spectrum of chiral (*P, E*)-3q**

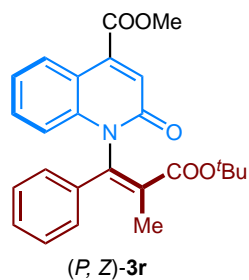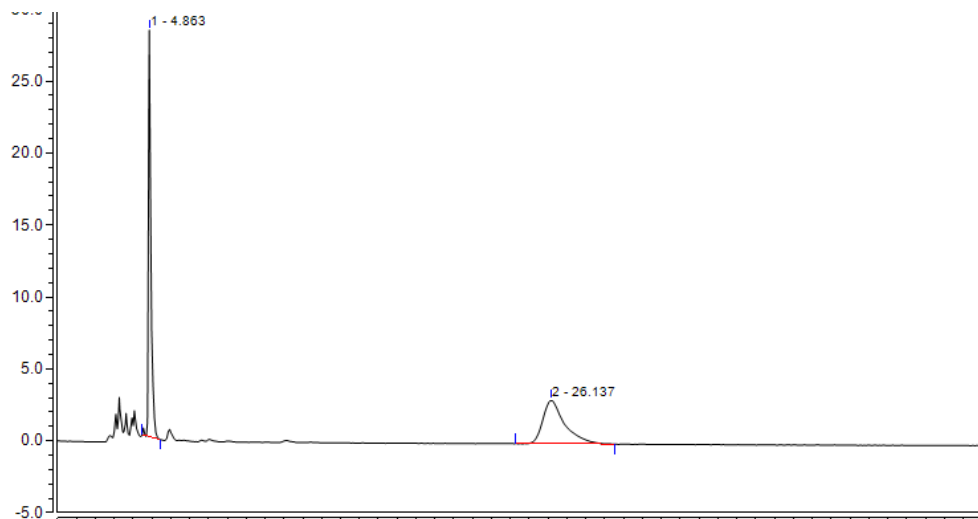

| Peak | Ret. Time (min) | Area (mAu*min) | Height (mAu) | Area % | Height % |
|------|-----------------|----------------|--------------|--------|----------|
| 1    | 4.863           | 4.144          | 28.256       | 50.62  | 90.37    |
| 2    | 26.137          | 4.044          | 3.011        | 49.38  | 9.63     |

**Supplementary Fig. 209. HPLC spectrum of racemic (P, Z)-3r**

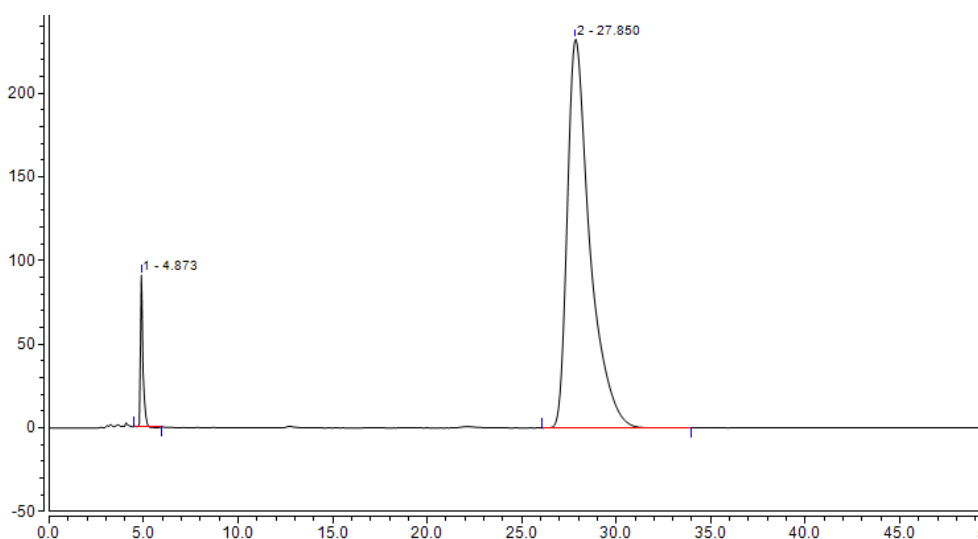

| Peak | Ret. Time (min) | Area (mAu*min) | Height (mAu) | Area % | Height % |
|------|-----------------|----------------|--------------|--------|----------|
| 1    | 4.873           | 12.777         | 90.491       | 3.84   | 28.03    |
| 2    | 27.850          | 319.942        | 232.356      | 96.16  | 71.97    |

**Supplementary Fig. 210. HPLC spectrum of chiral (P, Z)-3r**

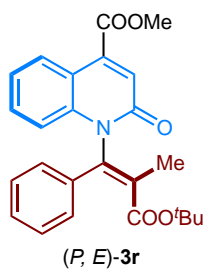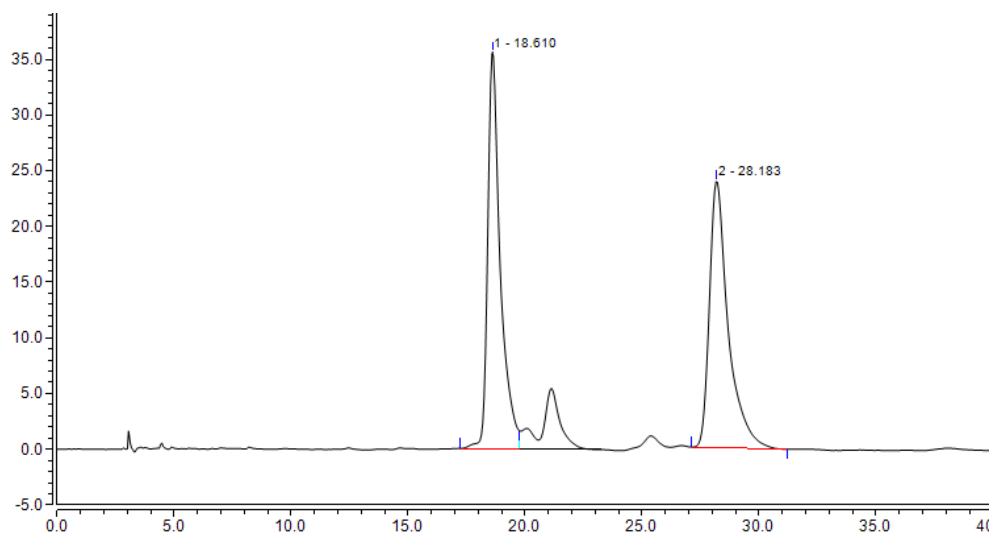

| Peak | Ret. Time (min) | Area (mAu*min) | Height (mAu) | Area % | Height % |
|------|-----------------|----------------|--------------|--------|----------|
| 1    | 18.610          | 22.252         | 35.629       | 50.04  | 59.79    |
| 2    | 28.183          | 22.215         | 23.962       | 49.96  | 40.21    |

**Supplementary Fig. 211. HPLC spectrum of racemic (P, E)-3r**

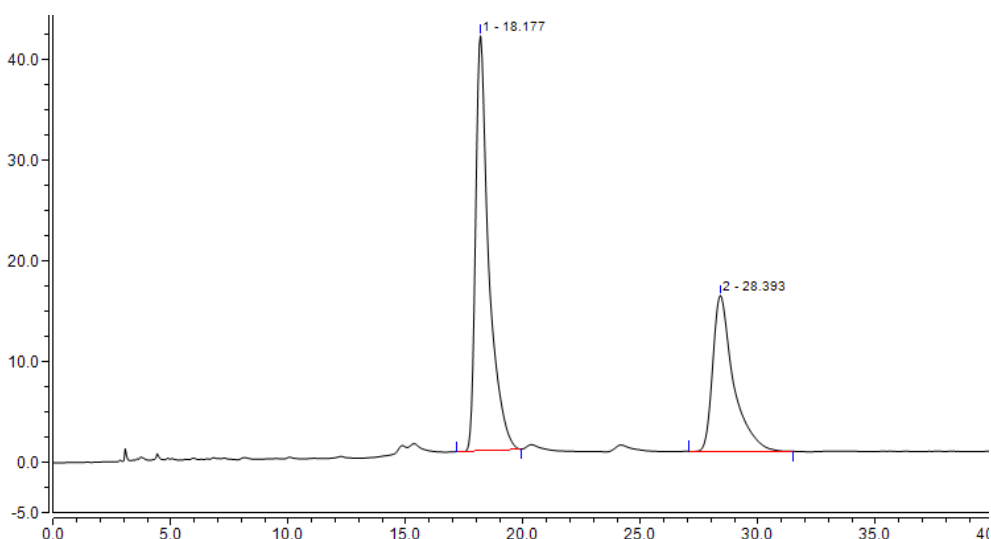

| Peak | Ret. Time (min) | Area (mAu*min) | Height (mAu) | Area % | Height % |
|------|-----------------|----------------|--------------|--------|----------|
| 1    | 18.177          | 26.892         | 41.213       | 63.14  | 72.69    |
| 2    | 28.393          | 15.702         | 15.487       | 36.86  | 27.31    |

**Supplementary Fig. 212. HPLC spectrum of chiral (P, E)-3r**

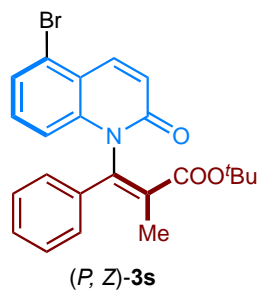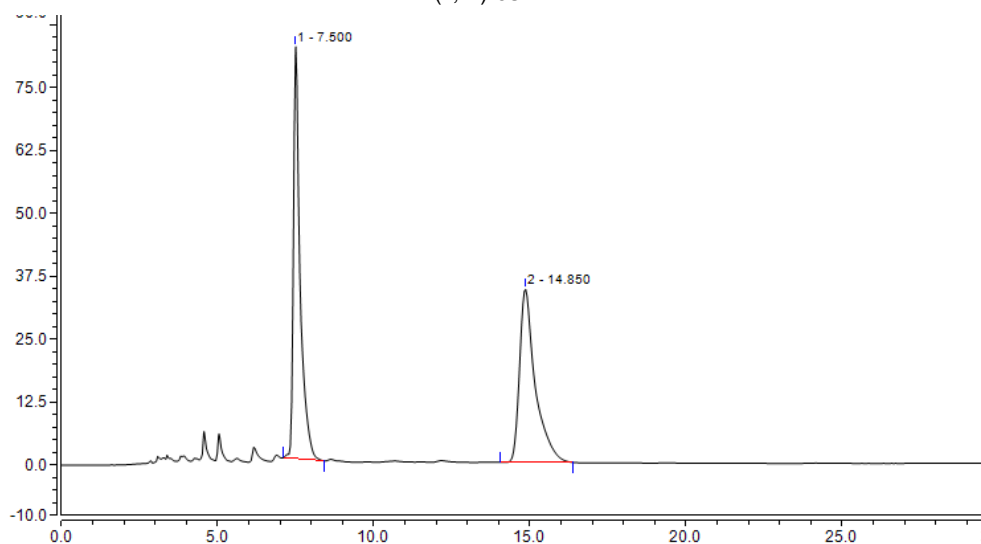

| Peak | Ret. Time (min) | Area (mAu*min) | Height (mAu) | Area % | Height % |
|------|-----------------|----------------|--------------|--------|----------|
| 1    | 7.500           | 20.247         | 81.839       | 50.38  | 70.37    |
| 2    | 14.850          | 19.942         | 34.465       | 49.62  | 29.63    |

**Supplementary Fig. 213. HPLC spectrum of racemic (P, Z)-3s**

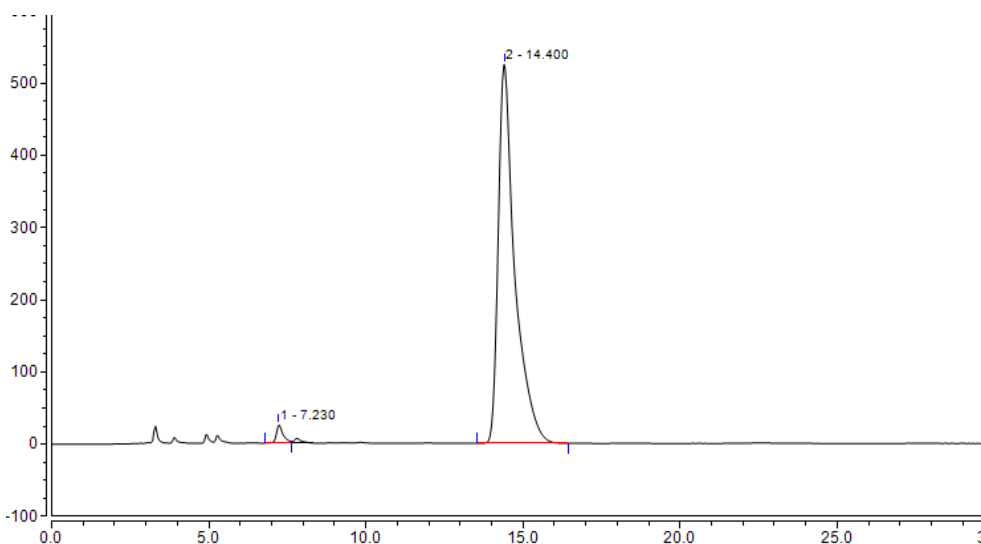

| Peak | Ret. Time (min) | Area (mAu*min) | Height (mAu) | Area % | Height % |
|------|-----------------|----------------|--------------|--------|----------|
| 1    | 7.230           | 6.236          | 25.183       | 1.91   | 4.58     |
| 2    | 14.400          | 320.920        | 524.797      | 98.09  | 95.42    |

**Supplementary Fig. 214. HPLC spectrum of chiral (P, Z)-3s**



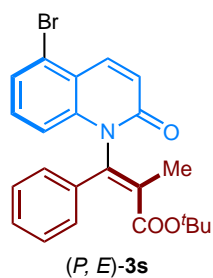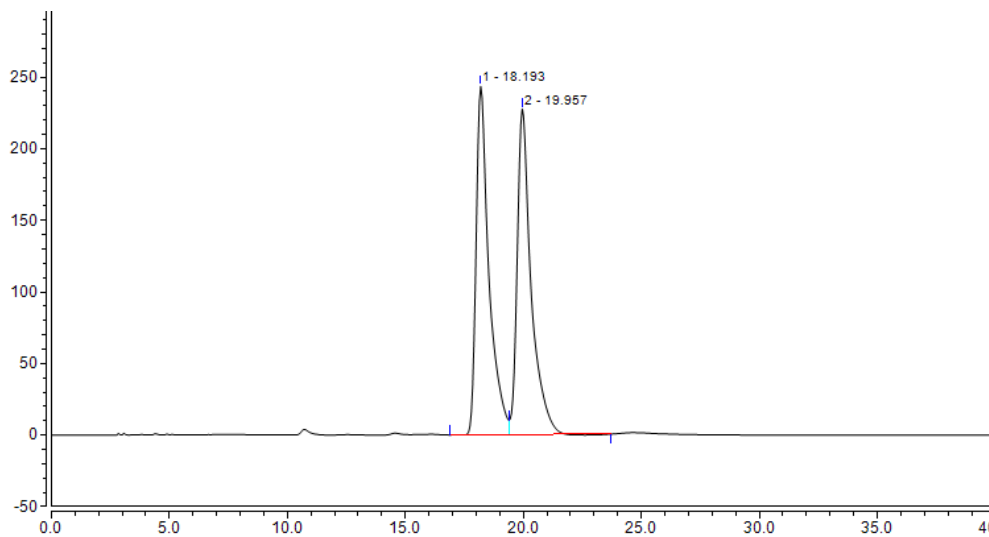

| Peak | Ret. Time (min) | Area (mAu*min) | Height (mAu) | Area % | Height % |
|------|-----------------|----------------|--------------|--------|----------|
| 1    | 18.193          | 153.623        | 243.508      | 49.82  | 51.71    |
| 2    | 19.957          | 154.722        | 227.430      | 50.18  | 48.29    |

**Supplementary Fig. 215. HPLC spectrum of racemic (P, E)-3s**

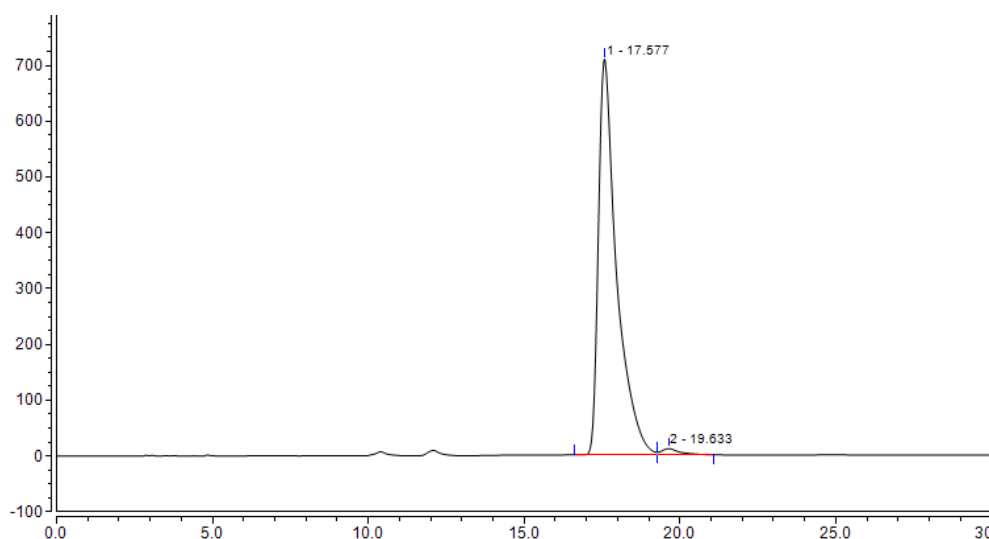

| Peak | Ret. Time (min) | Area (mAu*min) | Height (mAu) | Area % | Height % |
|------|-----------------|----------------|--------------|--------|----------|
| 1    | 17.577          | 480.214        | 708.963      | 98.44  | 98.46    |
| 2    | 19.633          | 7.597          | 11.112       | 1.56   | 1.54     |

**Supplementary Fig. 216. HPLC spectrum of chiral (P, E)-3s**

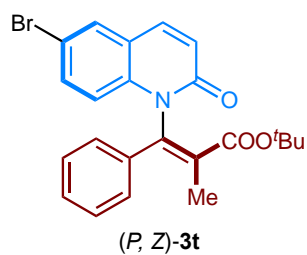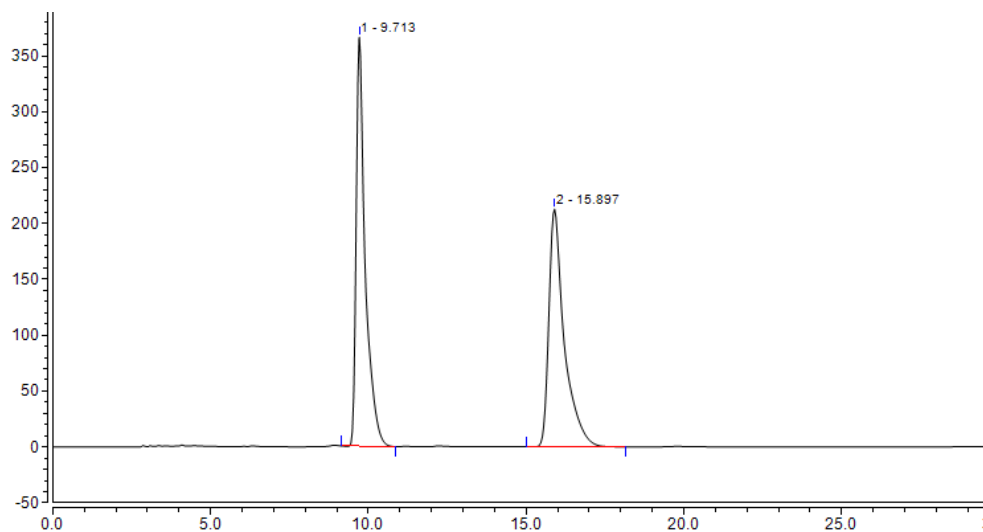

| Peak | Ret. Time (min) | Area (mAu*min) | Height (mAu) | Area % | Height % |
|------|-----------------|----------------|--------------|--------|----------|
| 1    | 9.713           | 121.540        | 365.963      | 50.32  | 63.23    |
| 2    | 15.897          | 120.015        | 212.861      | 49.68  | 36.77    |

**Supplementary Fig. 217. HPLC spectrum of racemic (P, Z)-3t**

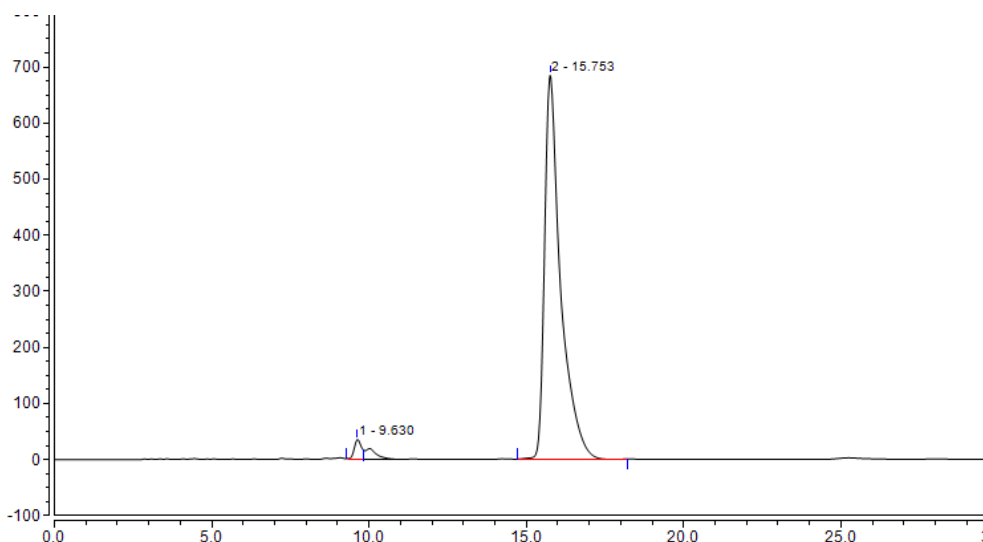

| Peak | Ret. Time (min) | Area (mAu*min) | Height (mAu) | Area % | Height % |
|------|-----------------|----------------|--------------|--------|----------|
| 1    | 9.630           | 8.908          | 34.650       | 2.15   | 4.82     |
| 2    | 15.753          | 404.730        | 684.236      | 97.85  | 95.18    |

**Supplementary Fig. 218. HPLC spectrum of chiral (P, Z)-3t**

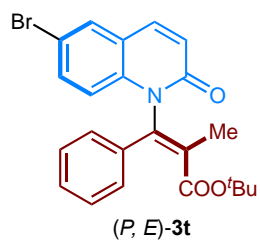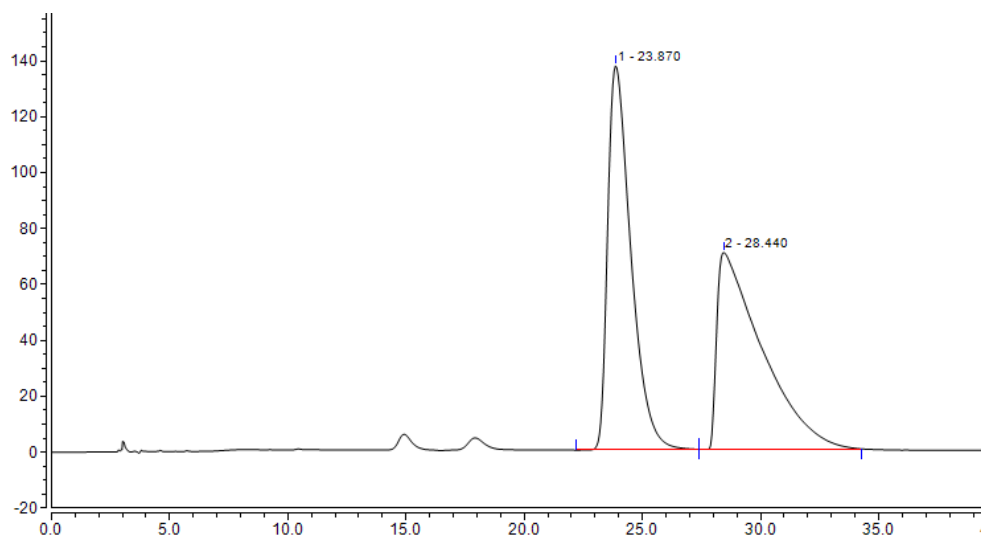

| Peak | Ret. Time (min) | Area (mAu*min) | Height (mAu) | Area % | Height % |
|------|-----------------|----------------|--------------|--------|----------|
| 1    | 23.870          | 156.330        | 137.413      | 50.11  | 66.13    |
| 2    | 28.440          | 155.674        | 70.388       | 49.89  | 33.87    |

**Supplementary Fig. 219. HPLC spectrum of racemic (*P, E*)-3t**

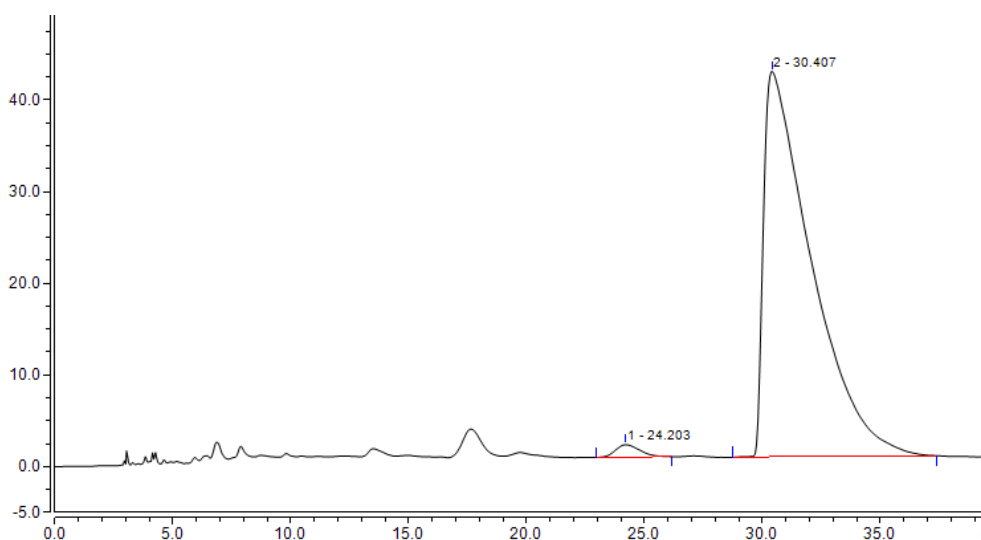

| Peak | Ret. Time (min) | Area (mAu*min) | Height (mAu) | Area % | Height % |
|------|-----------------|----------------|--------------|--------|----------|
| 1    | 24.203          | 1.627          | 1.363        | 1.62   | 3.14     |
| 2    | 30.407          | 98.799         | 42.070       | 98.38  | 96.86    |

**Supplementary Fig. 220. HPLC spectrum of chiral (*P, E*)-3t**

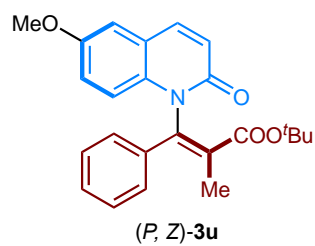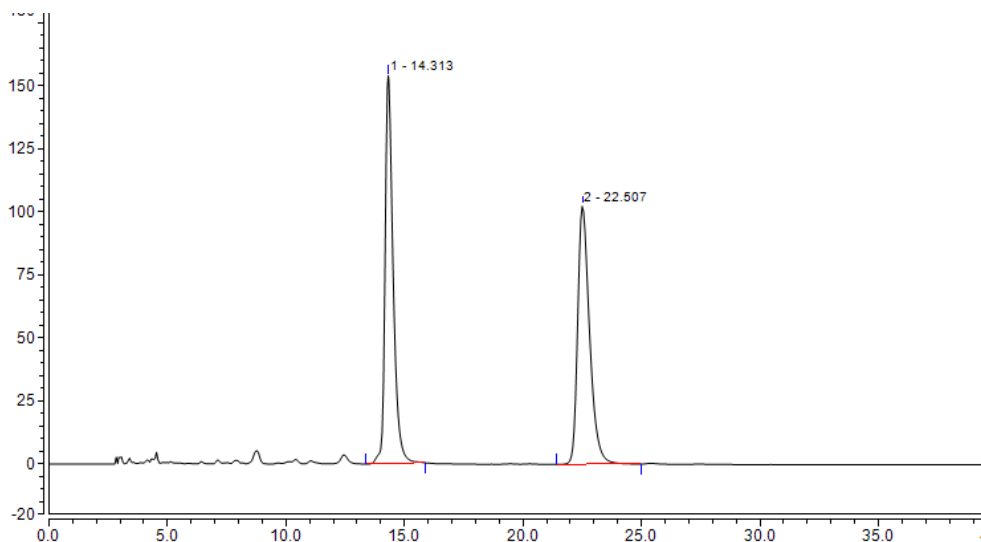

| Peak | Ret. Time (min) | Area (mAu*min) | Height (mAu) | Area % | Height % |
|------|-----------------|----------------|--------------|--------|----------|
| 1    | 14.313          | 60.555         | 153.873      | 50.39  | 60.02    |
| 2    | 22.507          | 59.621         | 102.483      | 49.61  | 39.98    |

**Supplementary Fig. 221. HPLC spectrum of racemic (*P, Z*)-3u**

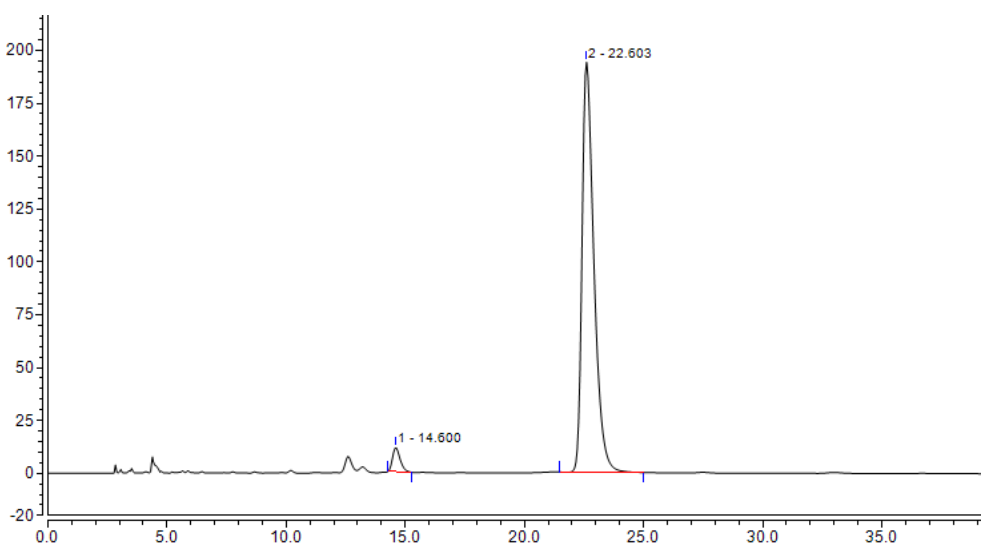

| Peak | Ret. Time (min) | Area (mAu*min) | Height (mAu) | Area % | Height % |
|------|-----------------|----------------|--------------|--------|----------|
| 1    | 14.600          | 4.240          | 11.434       | 3.65   | 5.57     |
| 2    | 22.603          | 112.077        | 193.942      | 96.35  | 94.43    |

**Supplementary Fig. 222. HPLC spectrum of chiral (*P, Z*)-3u**

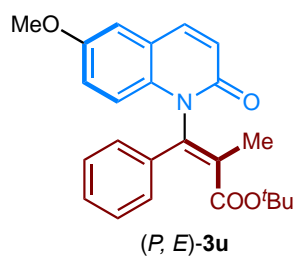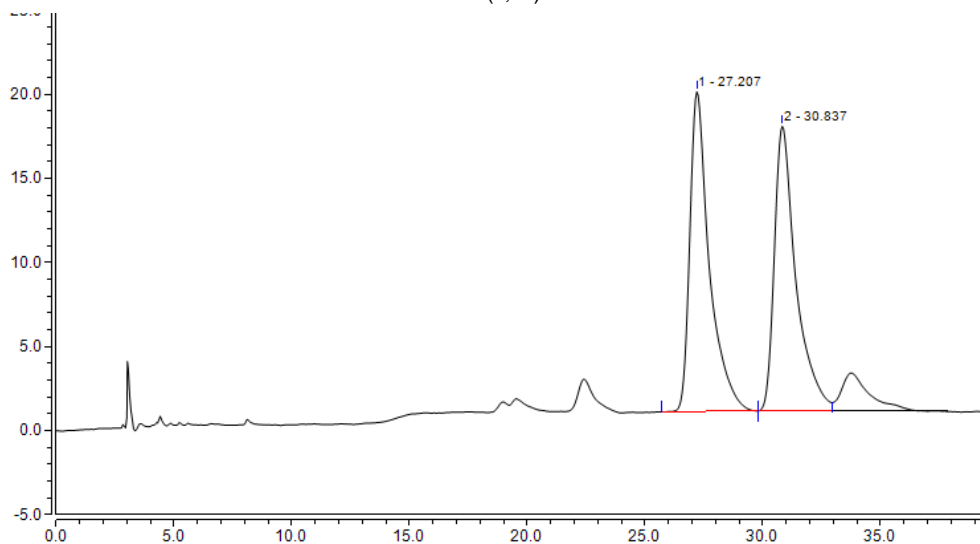

| Peak | Ret. Time (min) | Area (mAu*min) | Height (mAu) | Area % | Height % |
|------|-----------------|----------------|--------------|--------|----------|
| 1    | 27.207          | 18.269         | 19.025       | 50.40  | 52.89    |
| 2    | 30.837          | 17.978         | 16.944       | 49.60  | 47.11    |

**Supplementary Fig. 223. HPLC spectrum of racemic (*P, E*)-**3u****

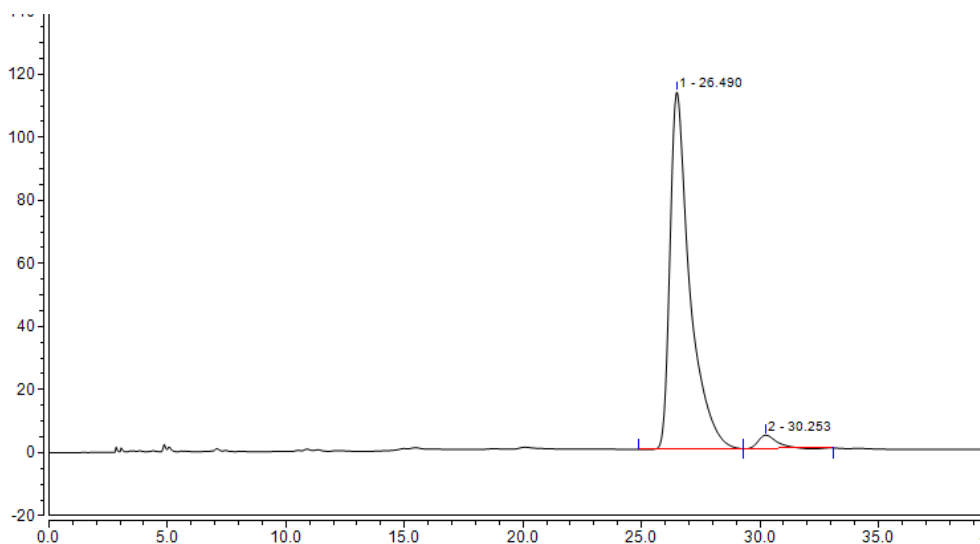

| Peak | Ret. Time (min) | Area (mAu*min) | Height (mAu) | Area % | Height % |
|------|-----------------|----------------|--------------|--------|----------|
| 1    | 26.490          | 109.270        | 113.194      | 96.81  | 96.42    |
| 2    | 30.253          | 3.602          | 4.201        | 3.19   | 3.58     |

**Supplementary Fig. 224. HPLC spectrum of chiral (*P, E*)-**3u****

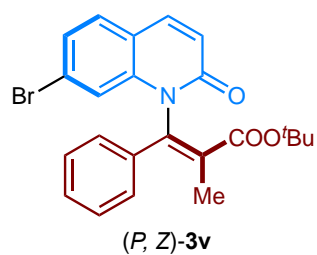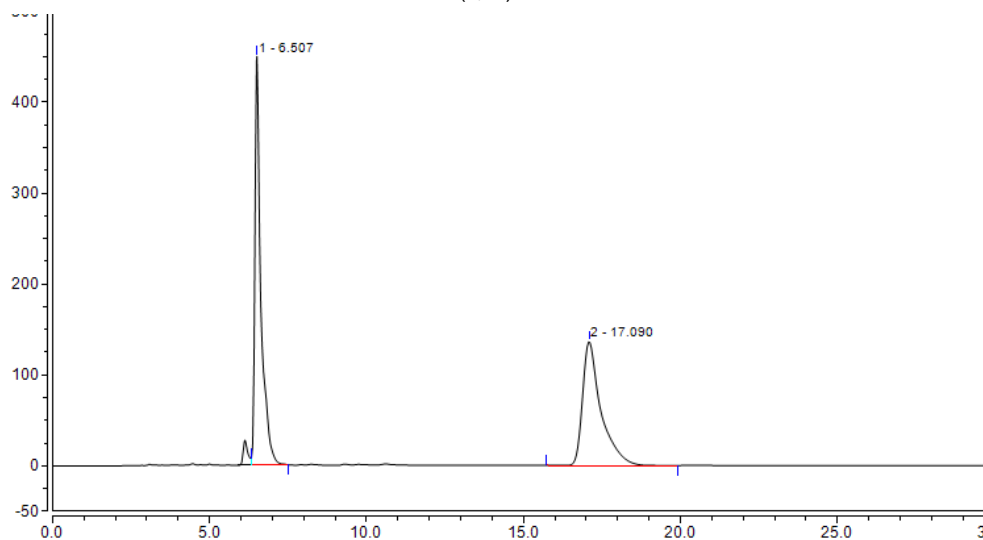

| Peak | Ret. Time (min) | Area (mAu*min) | Height (mAu) | Area % | Height % |
|------|-----------------|----------------|--------------|--------|----------|
| 1    | 6.507           | 99.009         | 449.528      | 51.77  | 76.74    |
| 2    | 17.090          | 92.251         | 136.254      | 48.23  | 23.26    |

**Supplementary Fig. 225. HPLC spectrum of racemic (P, Z)-3v**

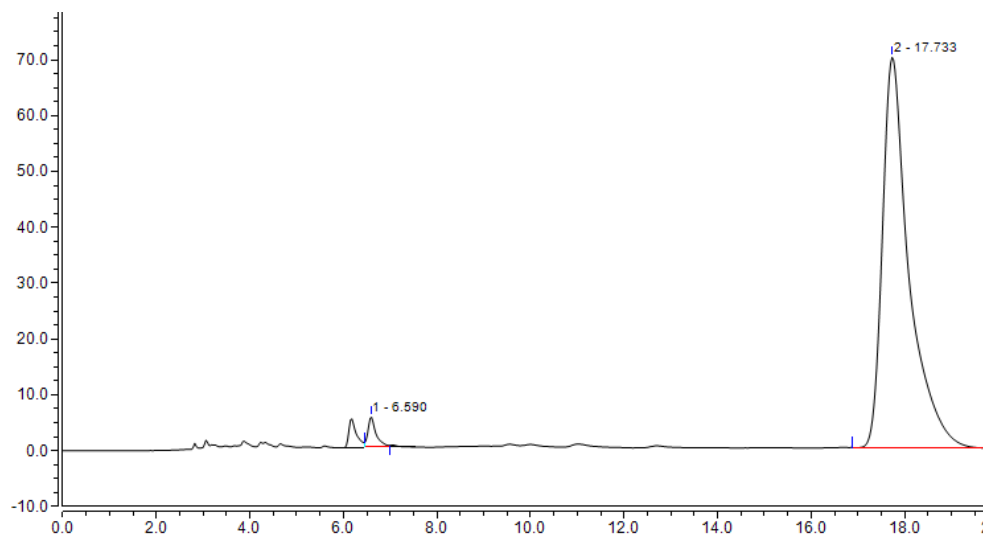

| Peak | Ret. Time (min) | Area (mAu*min) | Height (mAu) | Area % | Height % |
|------|-----------------|----------------|--------------|--------|----------|
| 1    | 6.590           | 1.107          | 5.446        | 2.36   | 7.23     |
| 2    | 17.733          | 45.873         | 69.928       | 97.64  | 92.77    |

**Supplementary Fig. 226. HPLC spectrum of chiral (P, Z)-3v**

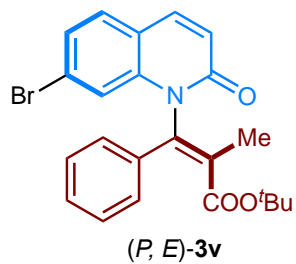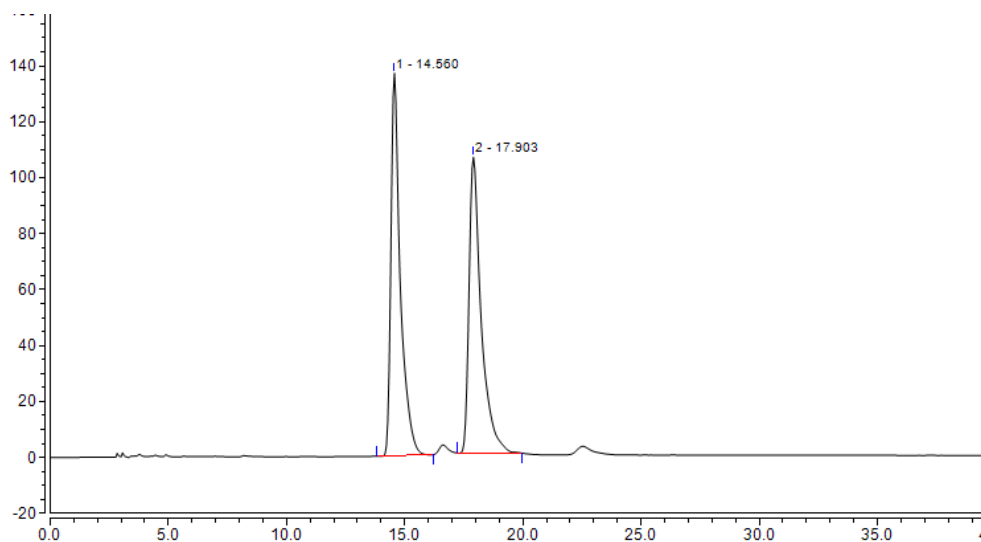

| Peak | Ret. Time (min) | Area (mAu*min) | Height (mAu) | Area % | Height % |
|------|-----------------|----------------|--------------|--------|----------|
| 1    | 14.560          | 63.057         | 136.740      | 50.10  | 56.38    |
| 2    | 17.903          | 62.809         | 105.795      | 49.90  | 43.62    |

**Supplementary Fig. 227. HPLC spectrum of racemic (*P, E*)-3v**

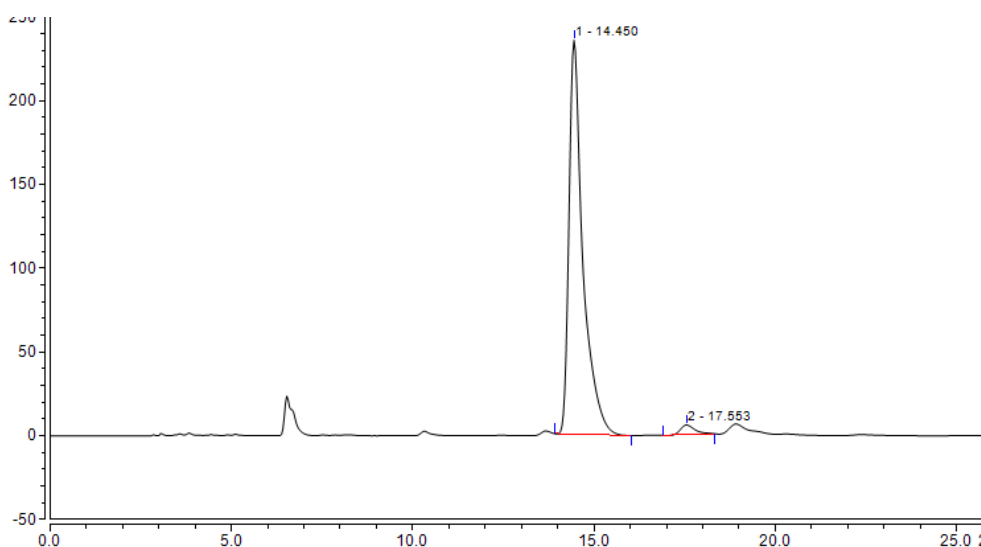

| Peak | Ret. Time (min) | Area (mAu*min) | Height (mAu) | Area % | Height % |
|------|-----------------|----------------|--------------|--------|----------|
| 1    | 14.450          | 104.408        | 235.147      | 97.50  | 97.59    |
| 2    | 17.553          | 2.677          | 5.816        | 2.50   | 2.41     |

**Supplementary Fig. 228. HPLC spectrum of chiral (*P, E*)-3v**

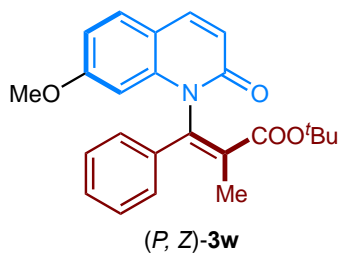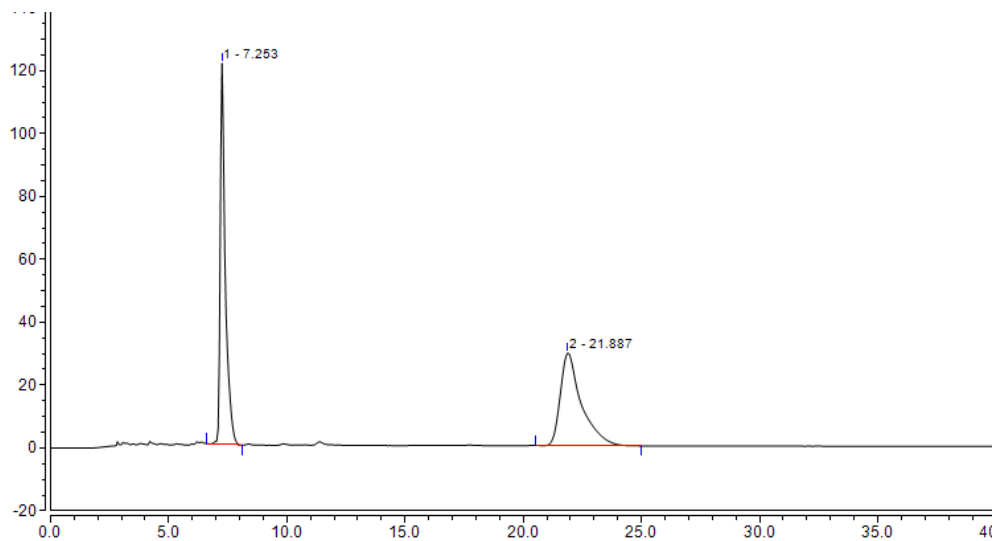

| Peak | Ret. Time (min) | Area (mAu*min) | Height (mAu) | Area % | Height % |
|------|-----------------|----------------|--------------|--------|----------|
| 1    | 7.253           | 30.135         | 121.217      | 49.88  | 80.44    |
| 2    | 21.887          | 30.280         | 29.483       | 50.12  | 19.56    |

**Supplementary Fig. 229. HPLC spectrum of racemic (*P, Z*)-**3w****

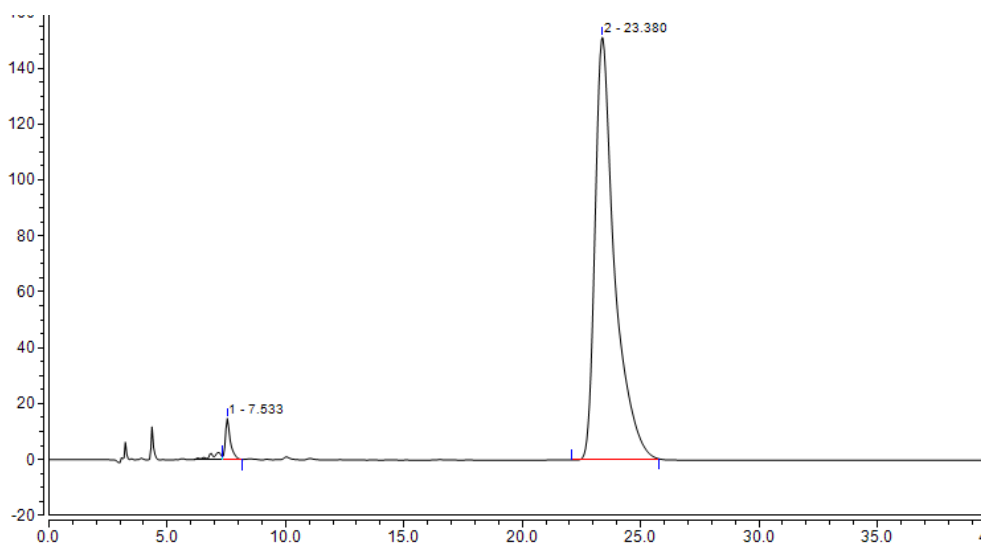

| Peak | Ret. Time (min) | Area (mAu*min) | Height (mAu) | Area % | Height % |
|------|-----------------|----------------|--------------|--------|----------|
| 1    | 7.533           | 3.563          | 14.752       | 2.41   | 8.90     |
| 2    | 23.880          | 144.153        | 151.010      | 97.59  | 91.10    |

**Supplementary Fig. 230. HPLC spectrum of chiral (*P, Z*)-**3w****



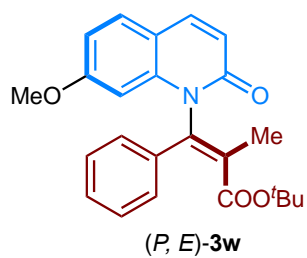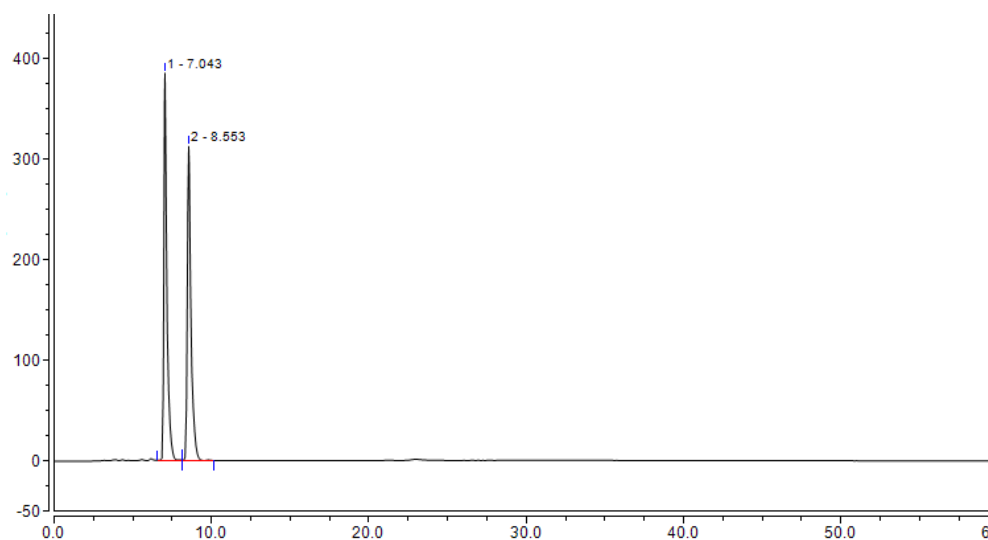

| Peak | Ret. Time (min) | Area (mAu*min) | Height (mAu) | Area % | Height % |
|------|-----------------|----------------|--------------|--------|----------|
| 1    | 7.043           | 84.155         | 384.985      | 50.34  | 55.23    |
| 2    | 8.553           | 83.005         | 312.099      | 49.66  | 44.77    |

**Supplementary Fig. 231. HPLC spectrum of racemic (P, E)-3w**

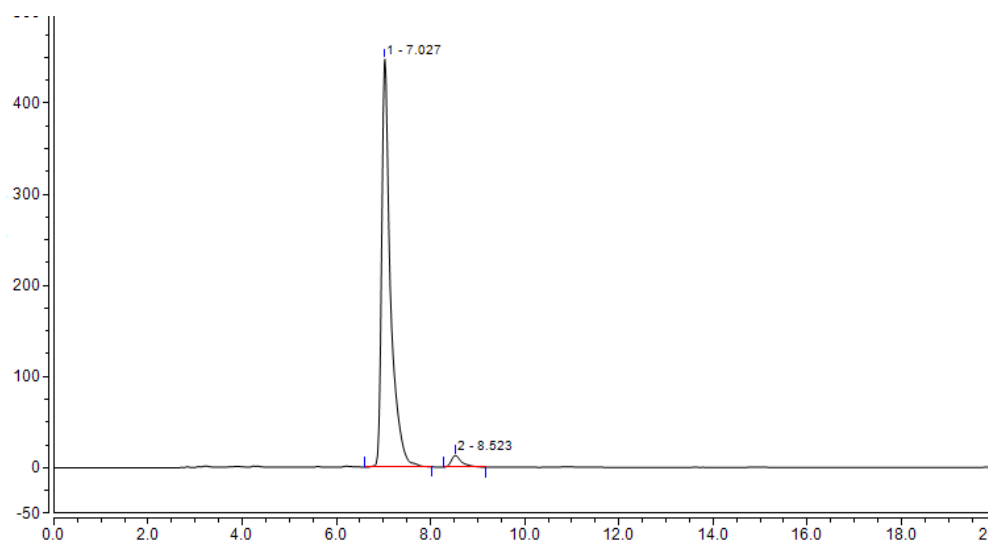

| Peak | Ret. Time (min) | Area (mAu*min) | Height (mAu) | Area % | Height % |
|------|-----------------|----------------|--------------|--------|----------|
| 1    | 7.027           | 97.171         | 447.506      | 96.64  | 97.21    |
| 2    | 8.523           | 3.382          | 12.840       | 3.36   | 2.79     |

**Supplementary Fig. 232. HPLC spectrum of chiral (P, E)-3w**

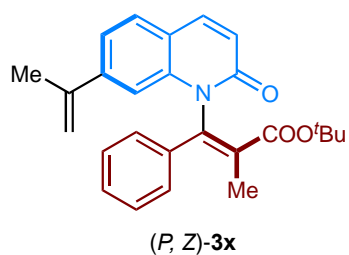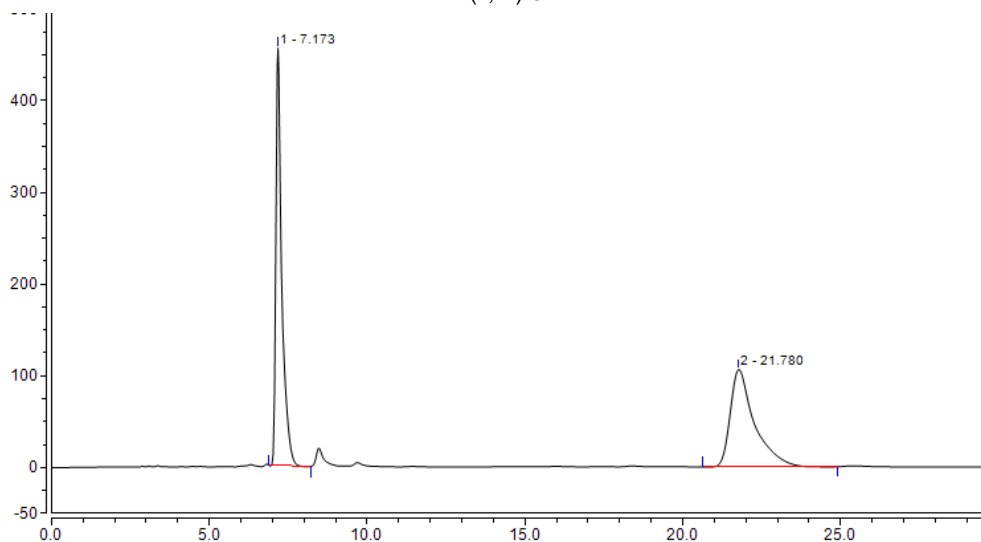

| Peak | Ret. Time (min) | Area (mAu*min) | Height (mAu) | Area % | Height % |
|------|-----------------|----------------|--------------|--------|----------|
| 1    | 7.173           | 98.254         | 454.769      | 51.15  | 81.07    |
| 2    | 21.780          | 93.824         | 106.197      | 48.85  | 18.93    |

**Supplementary Fig. 233. HPLC spectrum of racemic (*P, Z*)-3x**

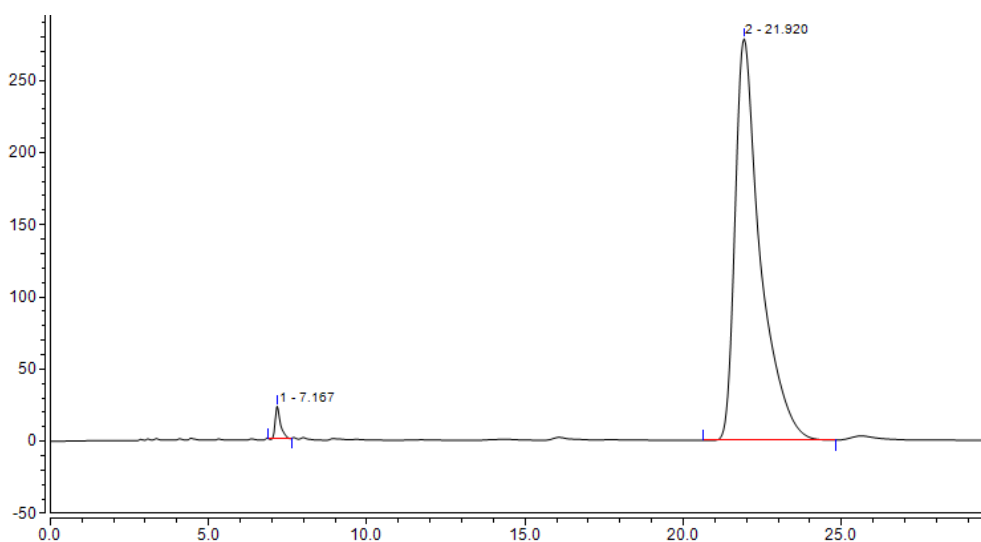

| Peak | Ret. Time (min) | Area (mAu*min) | Height (mAu) | Area % | Height % |
|------|-----------------|----------------|--------------|--------|----------|
| 1    | 7.167           | 4.239          | 22.489       | 1.62   | 7.48     |
| 2    | 21.920          | 256.936        | 278.304      | 98.38  | 92.52    |

**Supplementary Fig. 234. HPLC spectrum of chiral (*P, Z*)-3x**

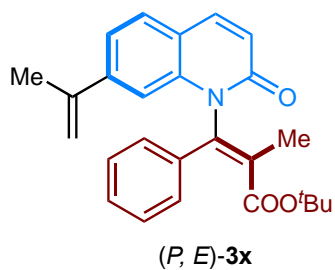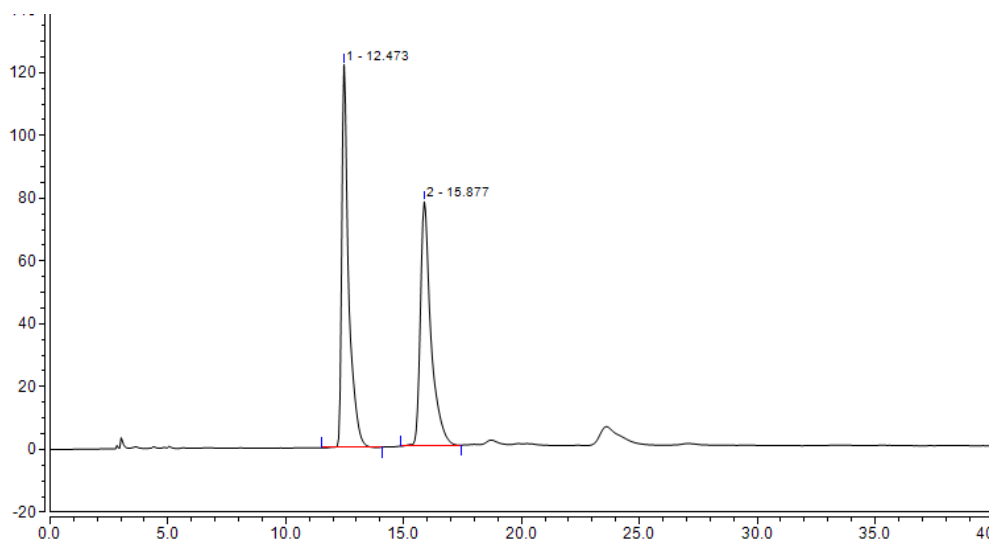

| Peak | Ret. Time (min) | Area (mAu*min) | Height (mAu) | Area % | Height % |
|------|-----------------|----------------|--------------|--------|----------|
| 1    | 12.473          | 41.143         | 121.998      | 50.50  | 61.08    |
| 2    | 15.877          | 40.323         | 77.733       | 49.50  | 38.92    |

**Supplementary Fig. 235. HPLC spectrum of racemic (P, E)-3x**

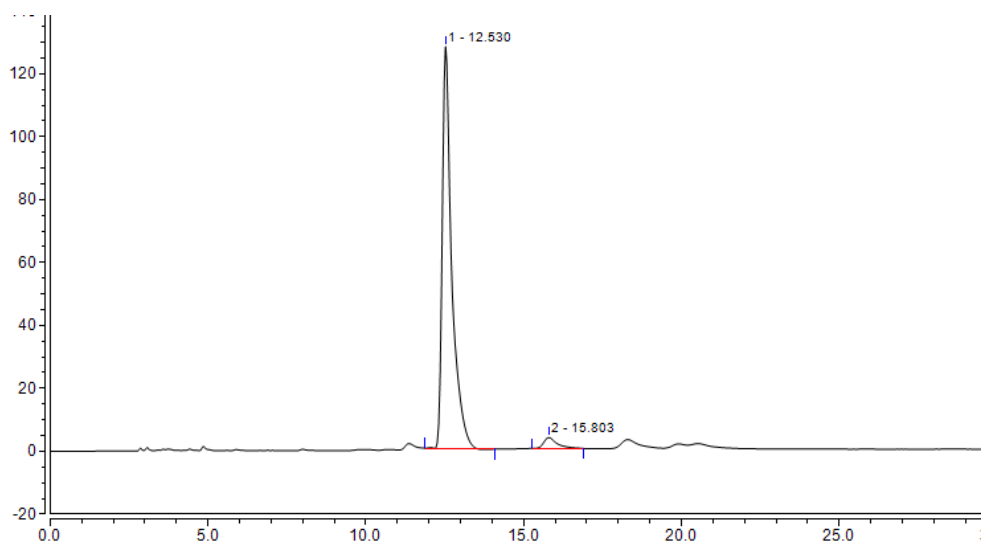

| Peak | Ret. Time (min) | Area (mAu*min) | Height (mAu) | Area % | Height % |
|------|-----------------|----------------|--------------|--------|----------|
| 1    | 12.530          | 44.545         | 127.767      | 96.35  | 97.36    |
| 2    | 15.803          | 1.686          | 3.464        | 3.65   | 2.64     |

**Supplementary Fig. 236. HPLC spectrum of chiral (P, E)-3x**

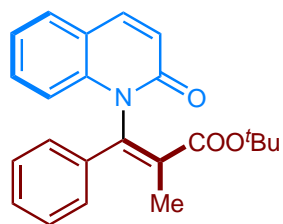

(*P, Z*)-3a

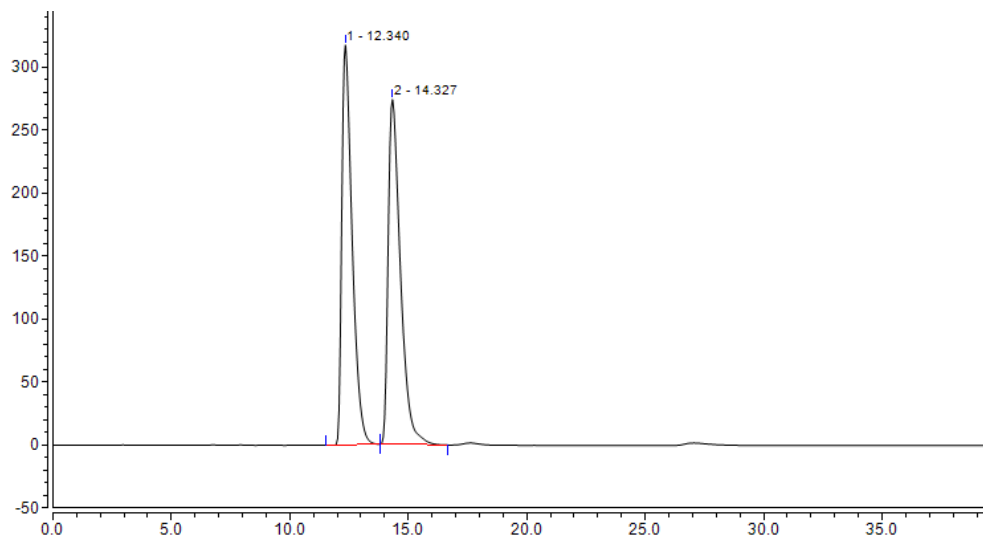

| Peak | Ret. Time (min) | Area (mAu*min) | Height (mAu) | Area % | Height % |
|------|-----------------|----------------|--------------|--------|----------|
| 1    | 12.340          | 160.688        | 317.392      | 49.45  | 53.69    |
| 2    | 14.327          | 164.233        | 273.727      | 50.55  | 46.31    |

**Supplementary Fig. 237. HPLC spectrum of racemic (*P, Z*)-3a**

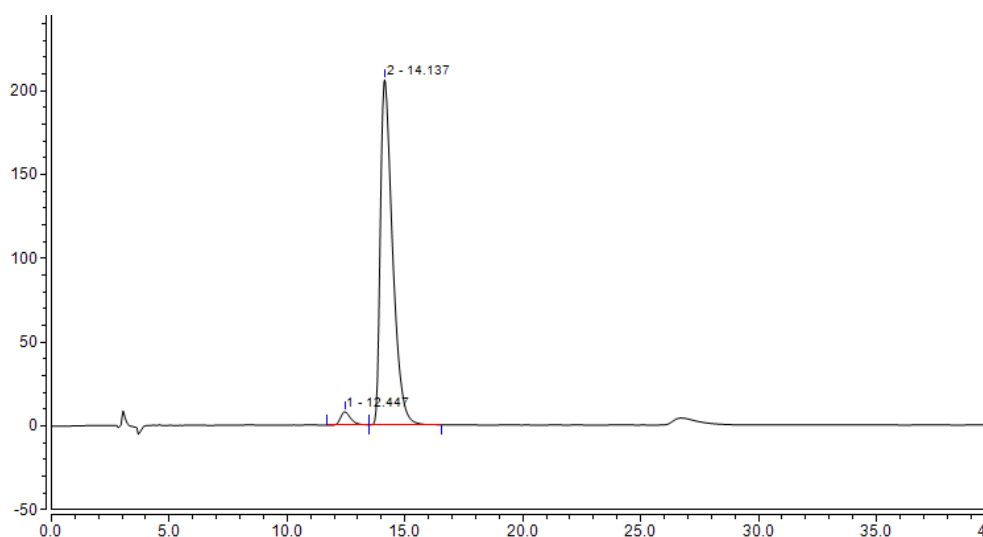

| Peak | Ret. Time (min) | Area (mAu*min) | Height (mAu) | Area % | Height % |
|------|-----------------|----------------|--------------|--------|----------|
| 1    | 12.447          | 3.914          | 7.943        | 3.08   | 3.72     |
| 2    | 14.137          | 123.192        | 205.858      | 96.92  | 96.28    |

**Supplementary Fig. 238. HPLC spectrum of chiral (*P, Z*)-3a**

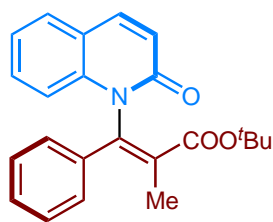

(*M, Z*)-3a



| Peak | Ret. Time (min) | Area (mAu*min) | Height (mAu) | Area % | Height % |
|------|-----------------|----------------|--------------|--------|----------|
| 1    | 12.340          | 160.688        | 317.392      | 49.45  | 53.69    |
| 2    | 14.327          | 164.233        | 273.727      | 50.55  | 46.31    |

Supplementary Fig. 239. HPLC spectrum of racemic (*M, Z*)-3a

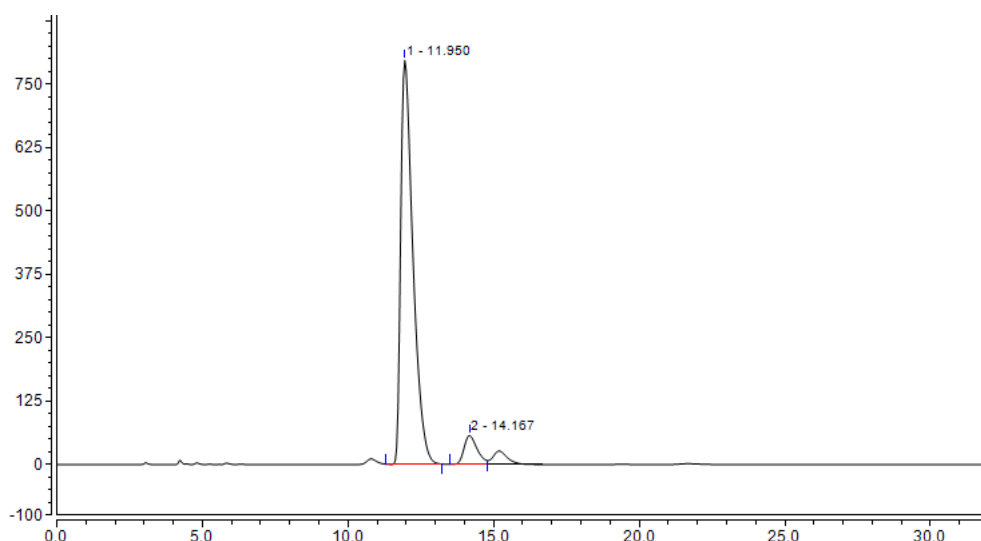

| Peak | Ret. Time (min) | Area (mAu*min) | Height (mAu) | Area % | Height % |
|------|-----------------|----------------|--------------|--------|----------|
| 1    | 11.960          | 387.802        | 796.609      | 92.88  | 93.33    |
| 2    | 14.167          | 29.726         | 56.894       | 7.12   | 6.67     |

Supplementary Fig. 240. HPLC spectrum of chiral (*M, Z*)-3a

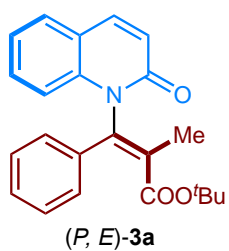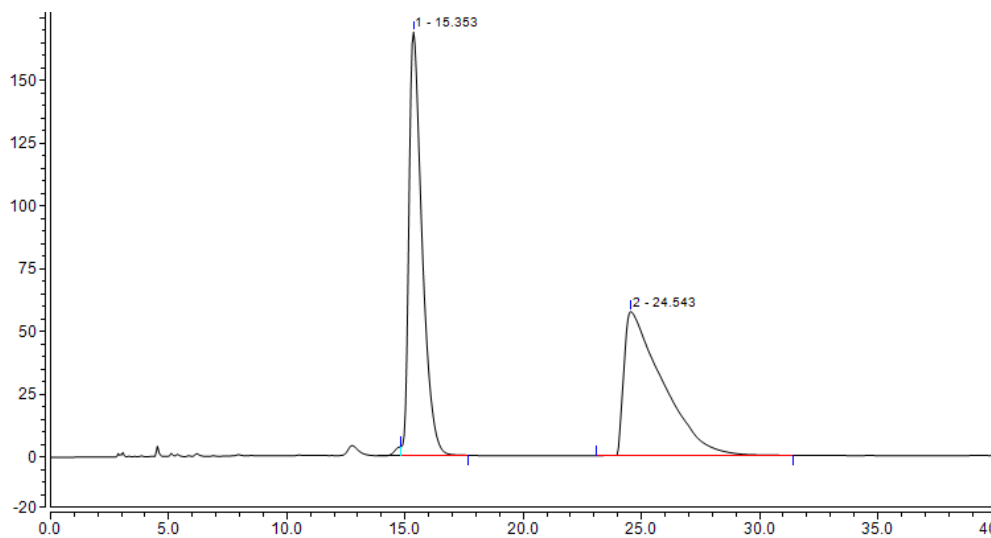

| Peak | Ret. Time (min) | Area (mAu*min) | Height (mAu) | Area % | Height % |
|------|-----------------|----------------|--------------|--------|----------|
| 1    | 15.353          | 108.716        | 168.680      | 50.03  | 74.63    |
| 2    | 24.543          | 108.579        | 57.338       | 49.97  | 25.37    |

**Supplementary Fig. 241. HPLC spectrum of racemic (*P, E*)-3a**

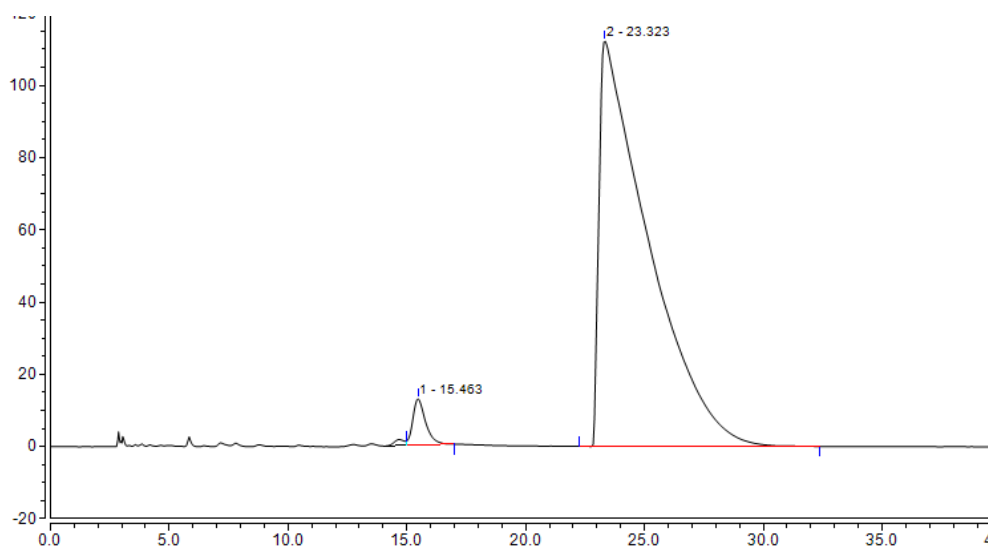

| Peak | Ret. Time (min) | Area (mAu*min) | Height (mAu) | Area % | Height % |
|------|-----------------|----------------|--------------|--------|----------|
| 1    | 15.463          | 8.009          | 12.848       | 2.88   | 10.27    |
| 2    | 23.323          | 270.152        | 112.303      | 97.12  | 89.73    |

**Supplementary Fig. 242. HPLC spectrum of chiral (*P, E*)-3a**

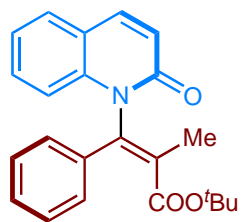

(*M, E*)-3a

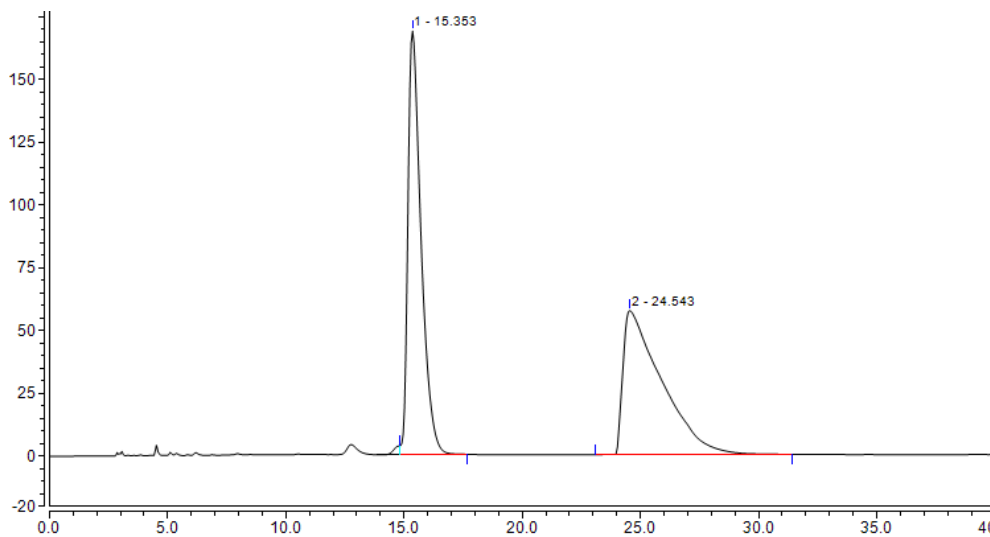

| Peak | Ret. Time (min) | Area (mAu*min) | Height (mAu) | Area % | Height % |
|------|-----------------|----------------|--------------|--------|----------|
| 1    | 15.353          | 108.716        | 168.680      | 50.03  | 74.63    |
| 2    | 24.543          | 108.579        | 57.338       | 49.97  | 25.37    |

**Supplementary Fig. 243. HPLC spectrum of racemic (*M, E*)-3a**

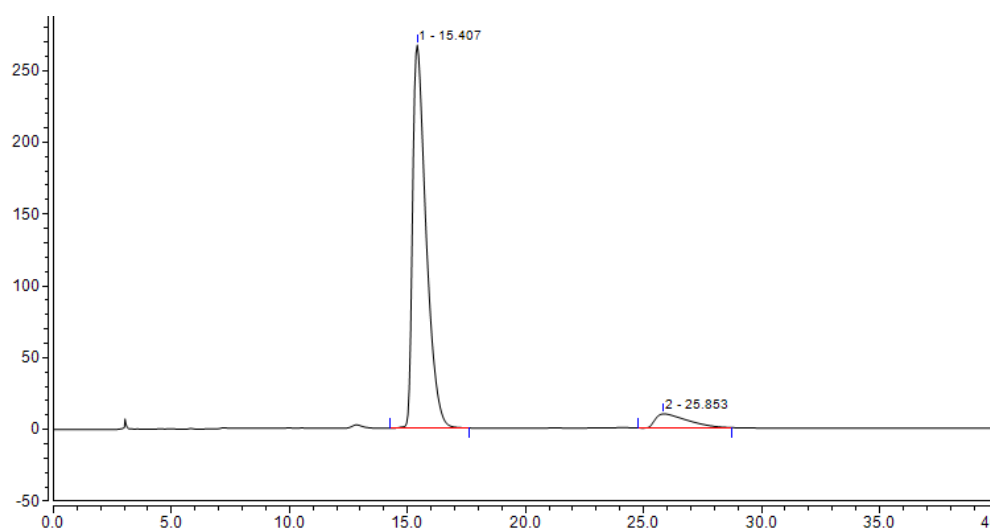

| Peak | Ret. Time (min) | Area (mAu*min) | Height (mAu) | Area % | Height % |
|------|-----------------|----------------|--------------|--------|----------|
| 1    | 15.407          | 176.556        | 267.040      | 92.06  | 96.47    |
| 2    | 25.853          | 15.237         | 9.780        | 7.94   | 3.53     |

**Supplementary Fig. 244. HPLC spectrum of chiral (*M, E*)-3a**



| Peak | Ret. Time (min) | Area (mAu*min) | Height (mAu) | Area % | Height % |
|------|-----------------|----------------|--------------|--------|----------|
| 1    | 7.500           | 20.247         | 81.839       | 50.38  | 70.37    |
| 2    | 14.850          | 19.942         | 34.465       | 49.62  | 29.63    |

**Supplementary Fig. 245. HPLC spectrum of racemic (P, Z)-3s**



| Peak | Ret. Time (min) | Area (mAu*min) | Height (mAu) | Area % | Height % |
|------|-----------------|----------------|--------------|--------|----------|
| 1    | 7.230           | 6.236          | 25.183       | 1.91   | 4.58     |
| 2    | 14.400          | 320.920        | 524.797      | 98.09  | 95.42    |

**Supplementary Fig. 246. HPLC spectrum of chiral (P, Z)-3s**



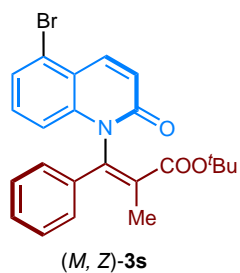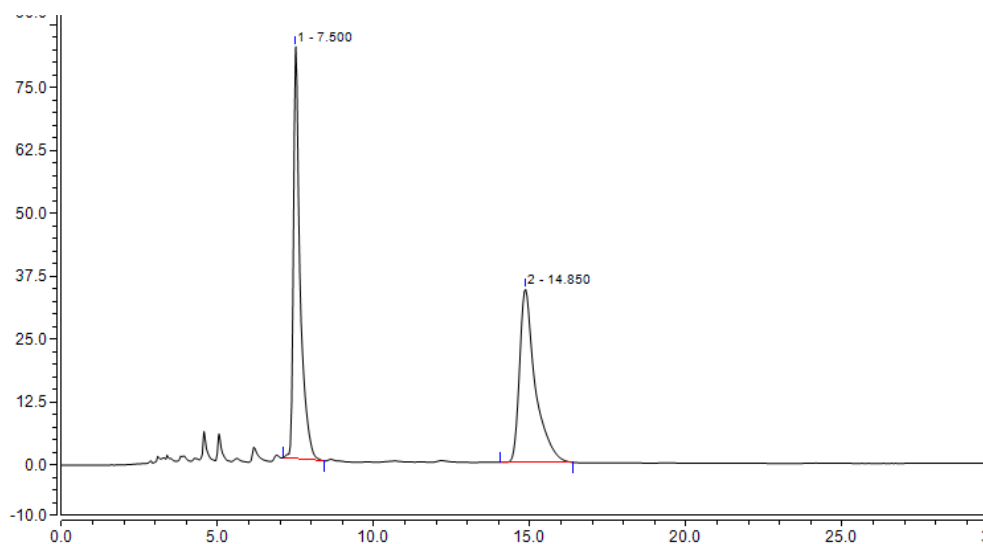

| Peak | Ret. Time (min) | Area (mAu*min) | Height (mAu) | Area % | Height % |
|------|-----------------|----------------|--------------|--------|----------|
| 1    | 7.500           | 20.247         | 81.839       | 50.38  | 70.37    |
| 2    | 14.850          | 19.942         | 34.465       | 49.62  | 29.63    |

**Supplementary Fig. 247. HPLC spectrum of racemic (*M, Z*)-3s**

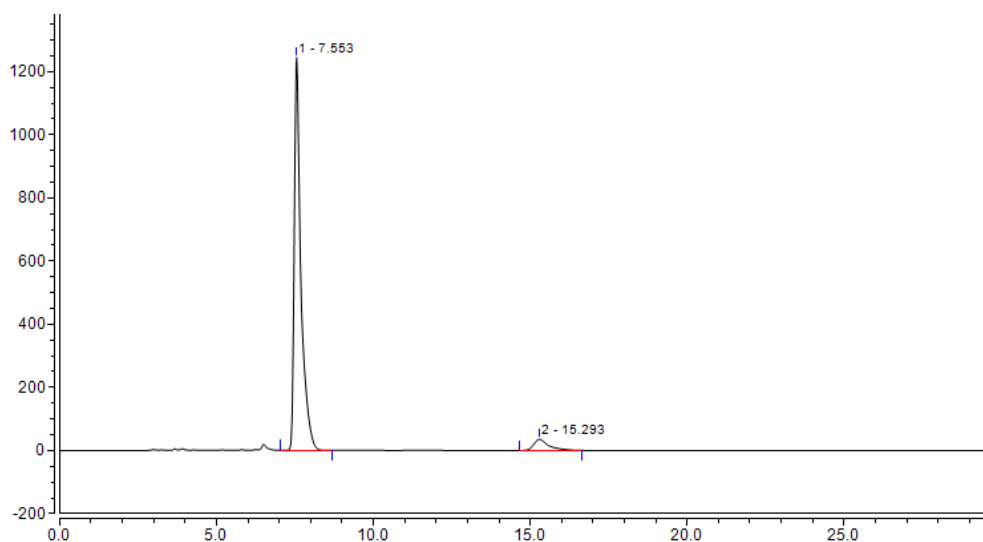

| Peak | Ret. Time (min) | Area (mAu*min) | Height (mAu) | Area % | Height % |
|------|-----------------|----------------|--------------|--------|----------|
| 1    | 7.553           | 305.037        | 1243.669     | 93.91  | 97.23    |
| 2    | 15.293          | 19.790         | 35.465       | 6.09   | 2.77     |

**Supplementary Fig. 248. HPLC spectrum of chiral (*M, Z*)-3s**

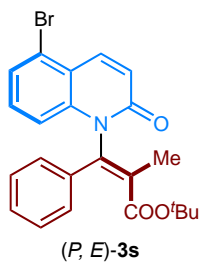

| Peak | Ret. Time (min) | Area (mAu*min) | Height (mAu) | Area % | Height % |
|------|-----------------|----------------|--------------|--------|----------|
| 1    | 18.193          | 153.623        | 243.508      | 49.82  | 51.71    |
| 2    | 19.957          | 154.722        | 227.430      | 50.18  | 48.29    |

**Supplementary Fig. 249. HPLC spectrum of racemic (*P, E*)-3s**



| Peak | Ret. Time (min) | Area (mAu*min) | Height (mAu) | Area % | Height % |
|------|-----------------|----------------|--------------|--------|----------|
| 1    | 17.577          | 480.214        | 708.963      | 98.44  | 98.46    |
| 2    | 19.633          | 7.597          | 11.112       | 1.56   | 1.54     |

**Supplementary Fig. 250. HPLC spectrum of chiral (*P, E*)-3s**

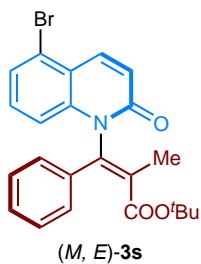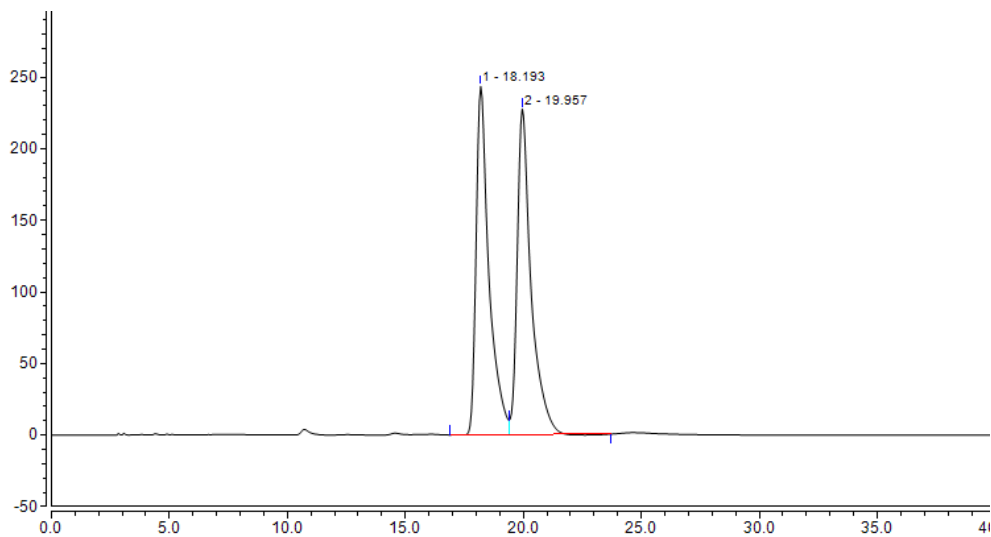

| Peak | Ret. Time (min) | Area (mAu*min) | Height (mAu) | Area % | Height % |
|------|-----------------|----------------|--------------|--------|----------|
| 1    | 18.193          | 153.623        | 243.508      | 49.82  | 51.71    |
| 2    | 19.957          | 154.722        | 227.430      | 50.18  | 48.29    |

**Supplementary Fig. 251. HPLC spectrum of racemic (*M, E*)-3s**

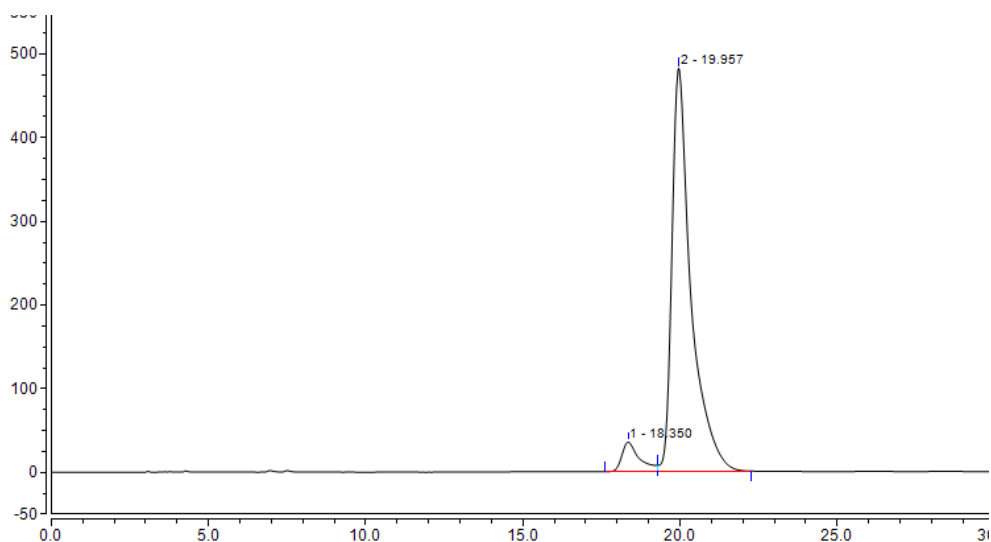

| Peak | Ret. Time (min) | Area (mAu*min) | Height (mAu) | Area % | Height % |
|------|-----------------|----------------|--------------|--------|----------|
| 1    | 18.350          | 22.506         | 35.109       | 6.24   | 6.79     |
| 2    | 19.957          | 338.245        | 481.880      | 93.76  | 93.21    |

**Supplementary Fig. 252. HPLC spectrum of chiral (*M, E*)-3s**

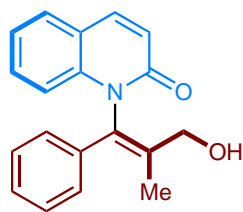

(P, Z)-4

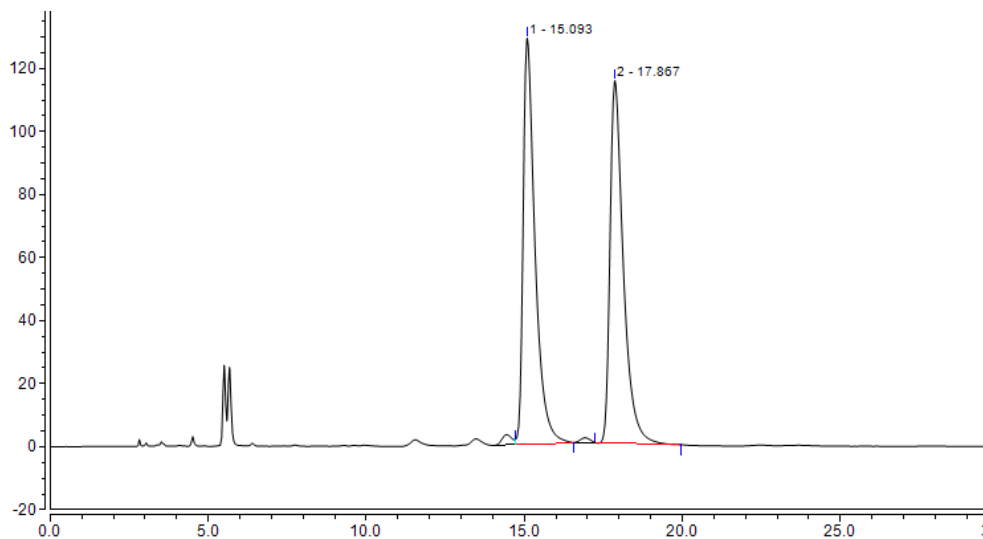

| Peak | Ret. Time (min) | Area (mAu*min) | Height (mAu) | Area % | Height % |
|------|-----------------|----------------|--------------|--------|----------|
| 1    | 15.093          | 56.387         | 128.951      | 50.13  | 52.85    |
| 2    | 17.867          | 56.106         | 115.049      | 49.87  | 47.15    |

**Supplementary Fig. 253. HPLC spectrum of racemic (P, Z)-4**

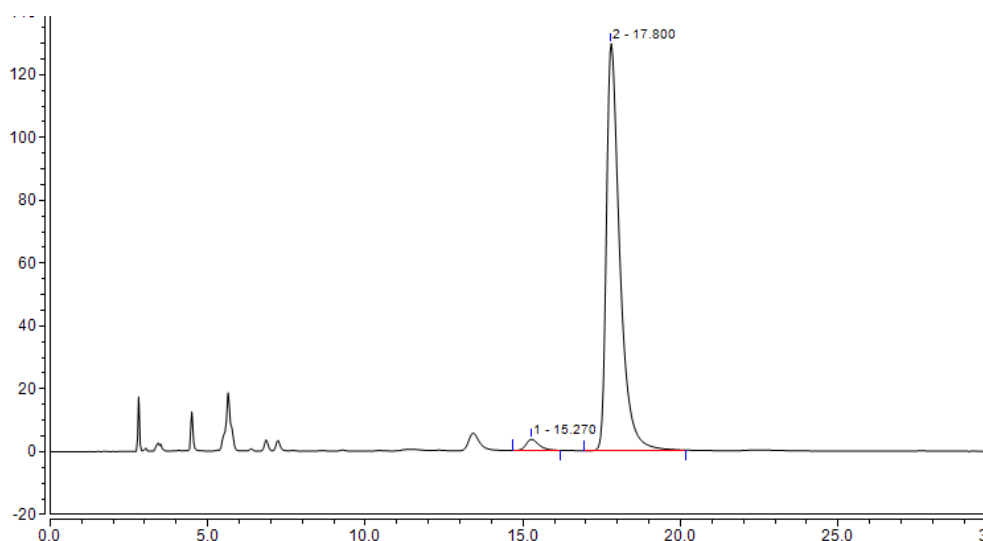

| Peak | Ret. Time (min) | Area (mAu*min) | Height (mAu) | Area % | Height % |
|------|-----------------|----------------|--------------|--------|----------|
| 1    | 15.270          | 1.682          | 3.556        | 2.57   | 2.67     |
| 2    | 17.800          | 63.657         | 129.573      | 97.43  | 97.33    |

**Supplementary Fig. 254. HPLC spectrum of chiral (P, Z)-4**

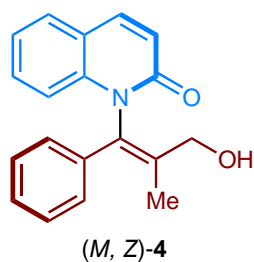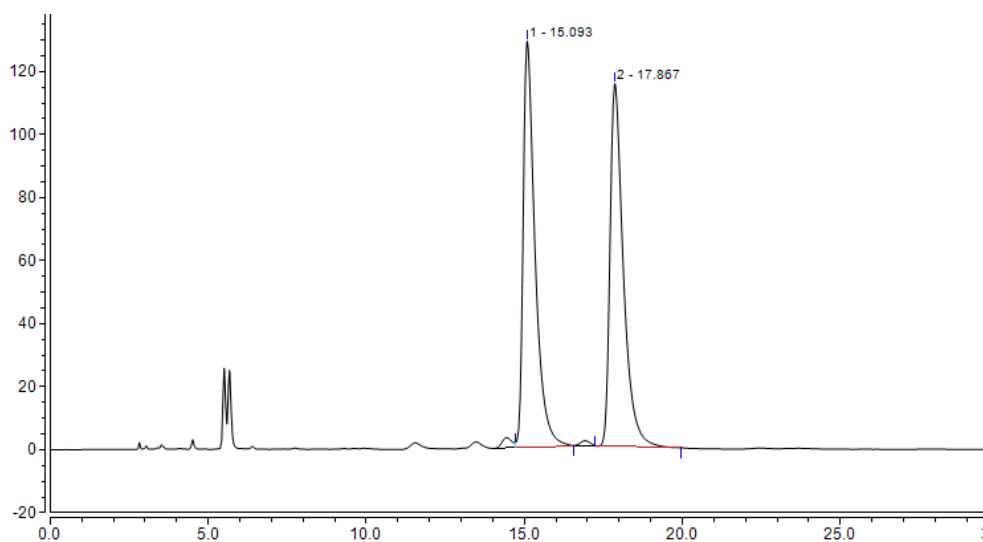

| Peak | Ret. Time (min) | Area (mAu*min) | Height (mAu) | Area % | Height % |
|------|-----------------|----------------|--------------|--------|----------|
| 1    | 15.093          | 56.387         | 128.951      | 50.13  | 52.85    |
| 2    | 17.867          | 56.106         | 115.049      | 49.87  | 47.15    |

**Supplementary Fig. 255. HPLC spectrum of racemic (*M, Z*)-4**

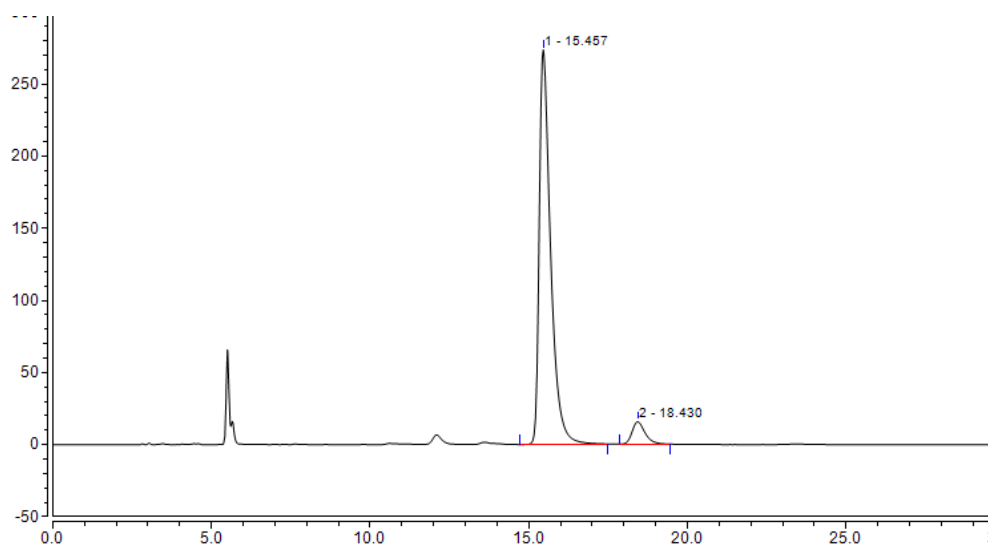

| Peak | Ret. Time (min) | Area (mAu*min) | Height (mAu) | Area % | Height % |
|------|-----------------|----------------|--------------|--------|----------|
| 1    | 15.457          | 113.138        | 273.578      | 93.91  | 94.63    |
| 2    | 18.430          | 7.333          | 15.526       | 6.09   | 5.37     |

**Supplementary Fig. 256. HPLC spectrum of chiral (*M, Z*)-4**

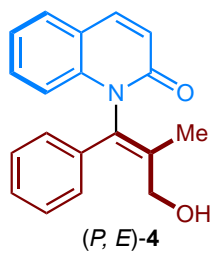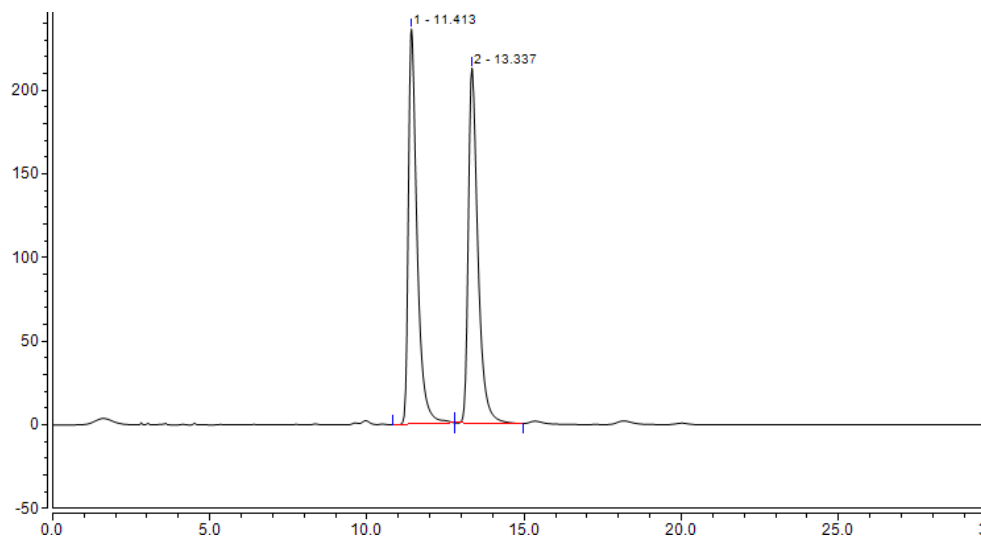

| Peak | Ret. Time (min) | Area (mAu*min) | Height (mAu) | Area % | Height % |
|------|-----------------|----------------|--------------|--------|----------|
| 1    | 11.413          | 75.618         | 236.244      | 50.16  | 52.69    |
| 2    | 13.337          | 75.130         | 212.122      | 49.84  | 47.31    |

**Supplementary Fig. 257. HPLC spectrum of racemic (P, E)-4**

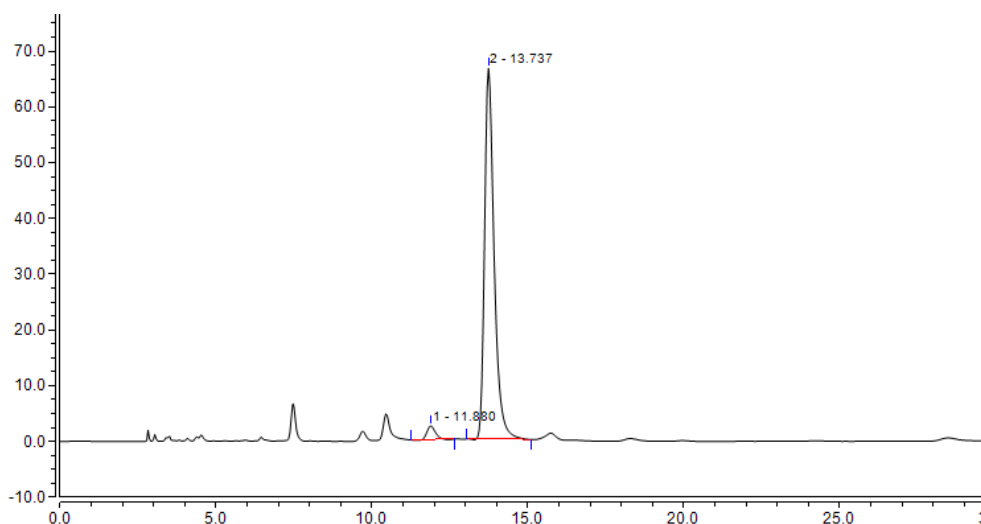

| Peak | Ret. Time (min) | Area (mAu*min) | Height (mAu) | Area % | Height % |
|------|-----------------|----------------|--------------|--------|----------|
| 1    | 11.880          | 0.712          | 2.443        | 2.93   | 3.54     |
| 2    | 13.737          | 23.601         | 66.492       | 97.07  | 96.46    |

**Supplementary Fig. 258. HPLC spectrum of chiral (P, E)-4**

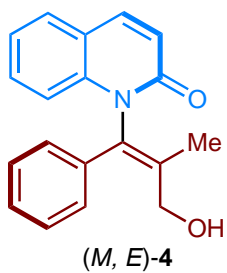

| Peak | Ret. Time (min) | Area (mAu*min) | Height (mAu) | Area % | Height % |
|------|-----------------|----------------|--------------|--------|----------|
| 1    | 11.413          | 75.618         | 236.244      | 50.16  | 52.69    |
| 2    | 13.337          | 75.130         | 212.122      | 49.84  | 47.31    |

**Supplementary Fig. 259. HPLC spectrum of racemic (*M, E*)-4**

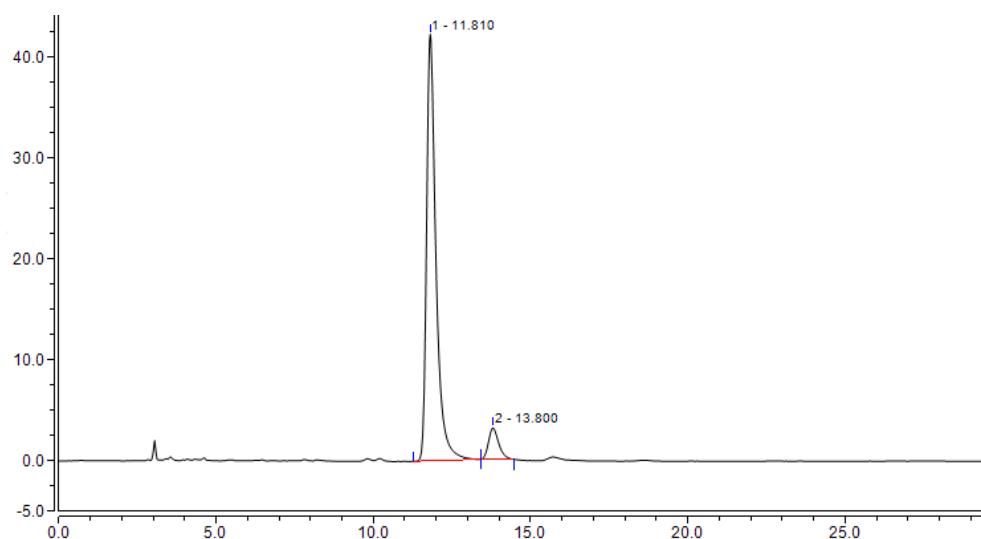

| Peak | Ret. Time (min) | Area (mAu*min) | Height (mAu) | Area % | Height % |
|------|-----------------|----------------|--------------|--------|----------|
| 1    | 11.810          | 14.613         | 42.287       | 92.61  | 93.14    |
| 2    | 13.800          | 1.166          | 3.117        | 7.39   | 6.86     |

**Supplementary Fig. 260. HPLC spectrum of chiral (*M, E*)-4**

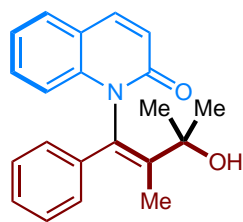

(*P, Z*)-5

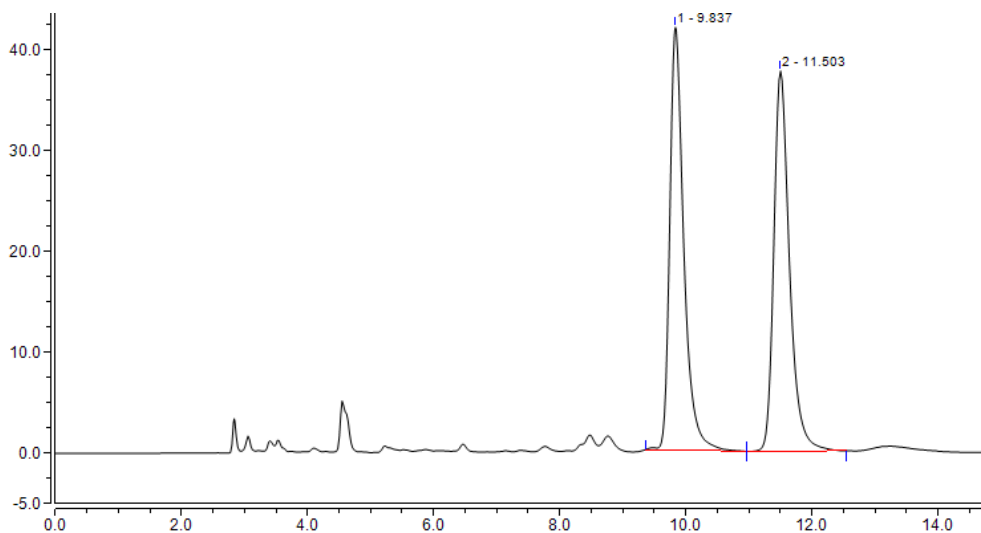

| Peak | Ret. Time (min) | Area (mAu*min) | Height (mAu) | Area % | Height % |
|------|-----------------|----------------|--------------|--------|----------|
| 1    | 9.837           | 10.806         | 41.937       | 49.92  | 52.66    |
| 2    | 11.503          | 10.839         | 37.707       | 50.08  | 47.34    |

**Supplementary Fig. 261. HPLC spectrum of racemic (*P, Z*)-5**

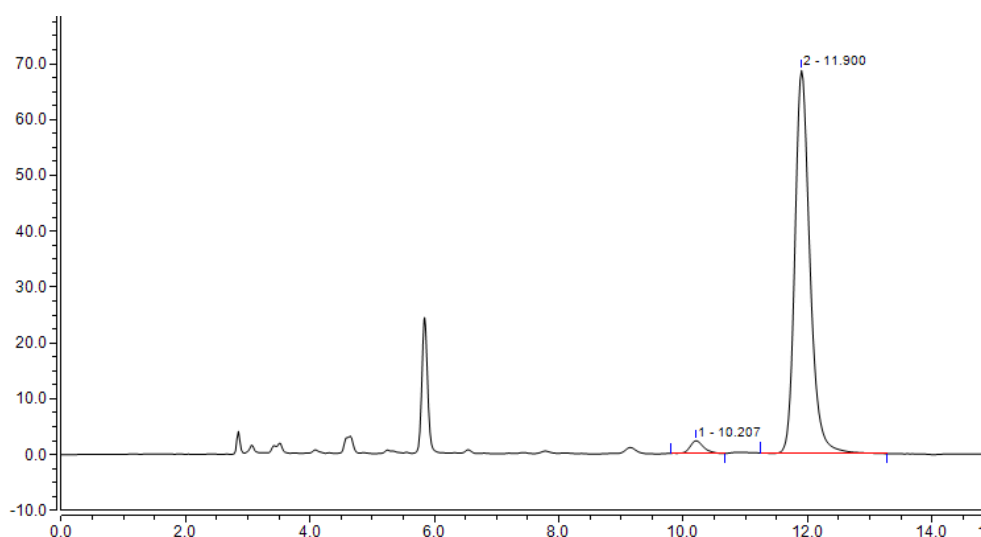

| Peak | Ret. Time (min) | Area (mAu*min) | Height (mAu) | Area % | Height % |
|------|-----------------|----------------|--------------|--------|----------|
| 1    | 10.207          | 0.561          | 2.253        | 2.85   | 3.18     |
| 2    | 11.900          | 19.129         | 68.551       | 97.15  | 96.82    |

**Supplementary Fig. 262. HPLC spectrum of chiral (*P, Z*)-5**



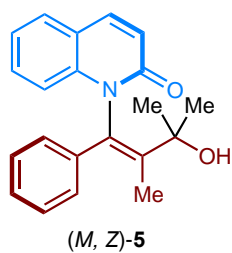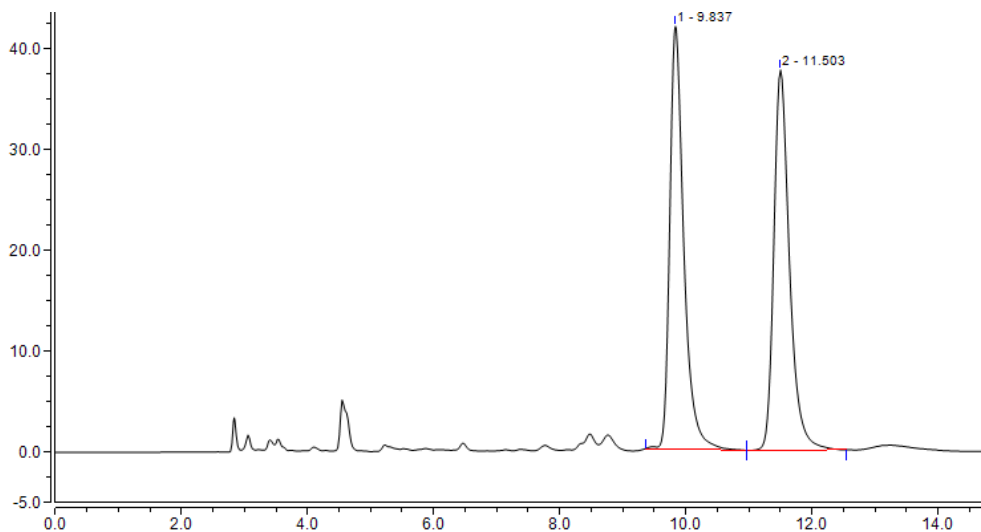

| Peak | Ret. Time (min) | Area (mAu*min) | Height (mAu) | Area % | Height % |
|------|-----------------|----------------|--------------|--------|----------|
| 1    | 9.837           | 10.806         | 41.937       | 49.92  | 52.66    |
| 2    | 11.503          | 10.839         | 37.707       | 50.08  | 47.34    |

**Supplementary Fig. 263. HPLC spectrum of racemic (*M, Z*)-5**

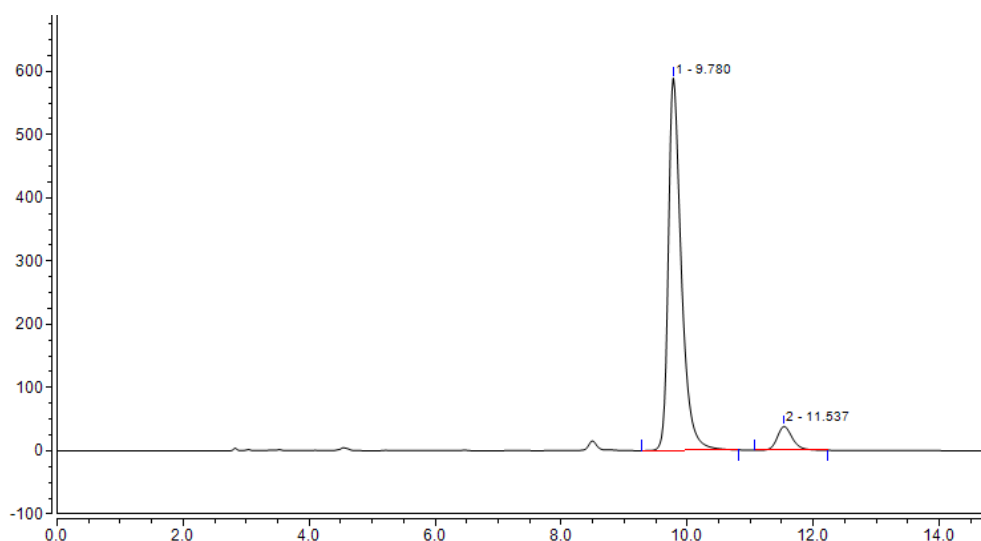

| Peak | Ret. Time (min) | Area (mAu*min) | Height (mAu) | Area % | Height % |
|------|-----------------|----------------|--------------|--------|----------|
| 1    | 9.780           | 140.164        | 588.896      | 92.98  | 93.98    |
| 2    | 11.537          | 10.589         | 37.701       | 7.02   | 6.02     |

**Supplementary Fig. 264. HPLC spectrum of chiral (*M, Z*)-5**

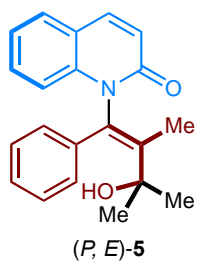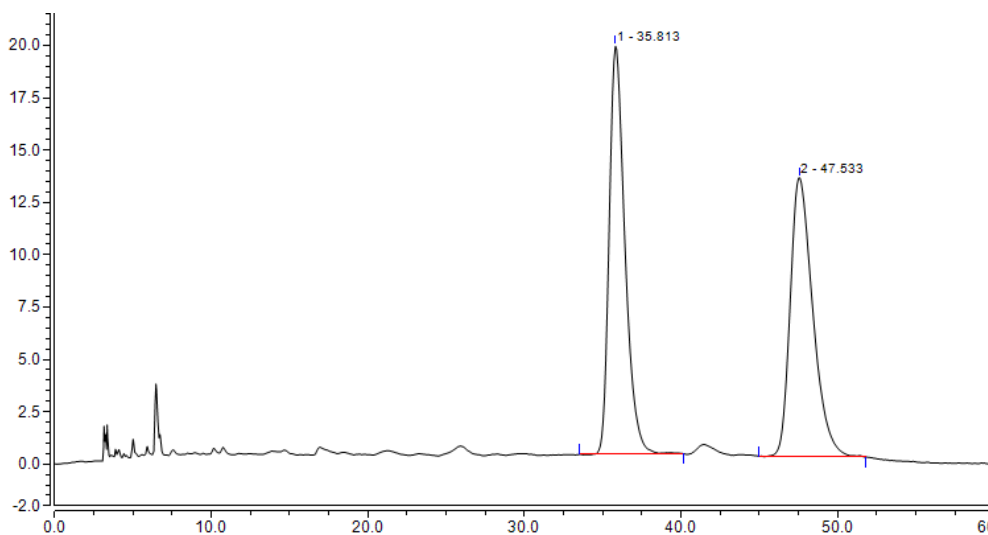

| Peak | Ret. Time (min) | Area (mAu*min) | Height (mAu) | Area % | Height % |
|------|-----------------|----------------|--------------|--------|----------|
| 1    | 35.813          | 22.689         | 19.495       | 50.41  | 59.39    |
| 2    | 47.533          | 22.316         | 13.330       | 49.59  | 40.61    |

**Supplementary Fig. 265. HPLC spectrum of racemic (*P, E*)-5**

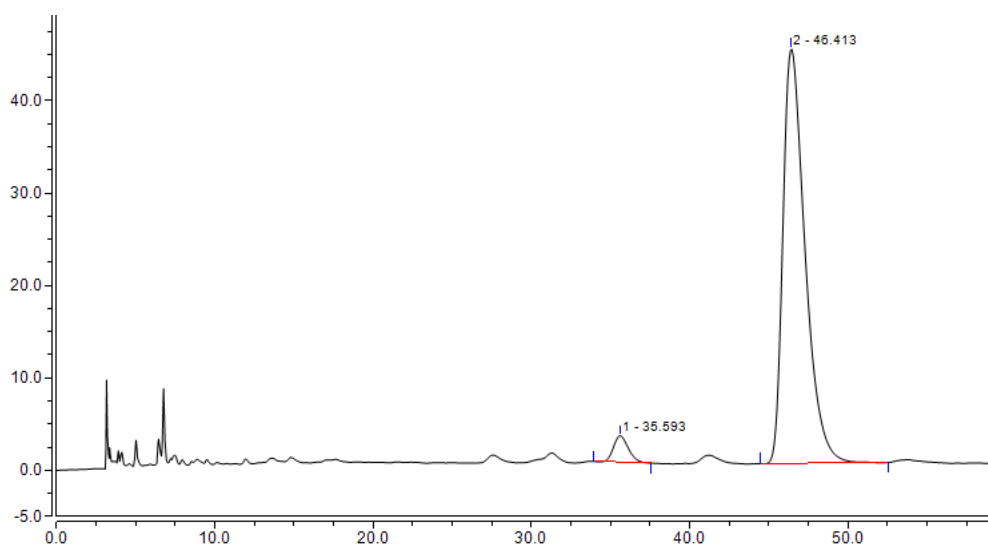

| Peak | Ret. Time (min) | Area (mAu*min) | Height (mAu) | Area % | Height % |
|------|-----------------|----------------|--------------|--------|----------|
| 1    | 35.593          | 3.048          | 2.856        | 4.04   | 5.99     |
| 2    | 46.413          | 72.440         | 44.850       | 95.96  | 94.01    |

**Supplementary Fig. 266. HPLC spectrum of chiral (*P, E*)-5**

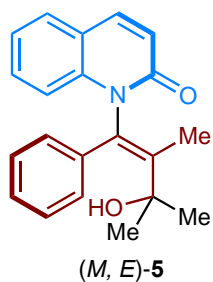

| Peak | Ret. Time (min) | Area (mAu*min) | Height (mAu) | Area % | Height % |
|------|-----------------|----------------|--------------|--------|----------|
| 1    | 35.813          | 22.689         | 19.495       | 50.41  | 59.39    |
| 2    | 47.533          | 22.316         | 13.330       | 49.59  | 40.61    |

**Supplementary Fig. 267. HPLC spectrum of racemic (*M, E*)-5**

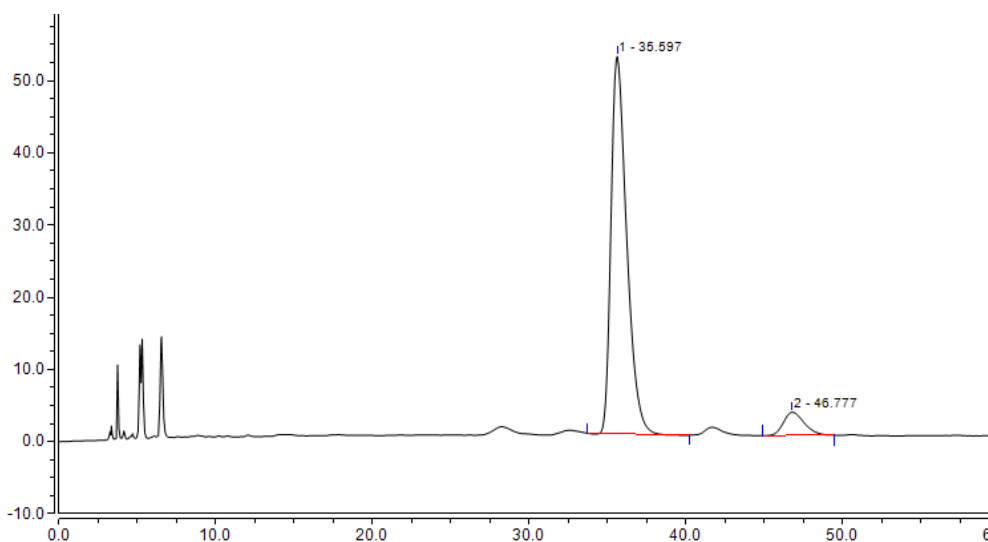

| Peak | Ret. Time (min) | Area (mAu*min) | Height (mAu) | Area % | Height % |
|------|-----------------|----------------|--------------|--------|----------|
| 1    | 35.597          | 60.536         | 52.306       | 92.46  | 94.20    |
| 2    | 46.777          | 4.938          | 3.219        | 7.54   | 5.80     |

**Supplementary Fig. 268. HPLC spectrum of chiral (*M, E*)-5**

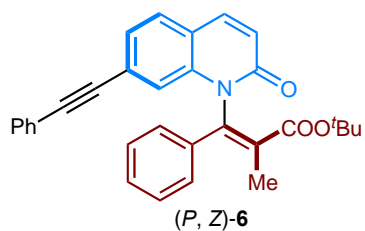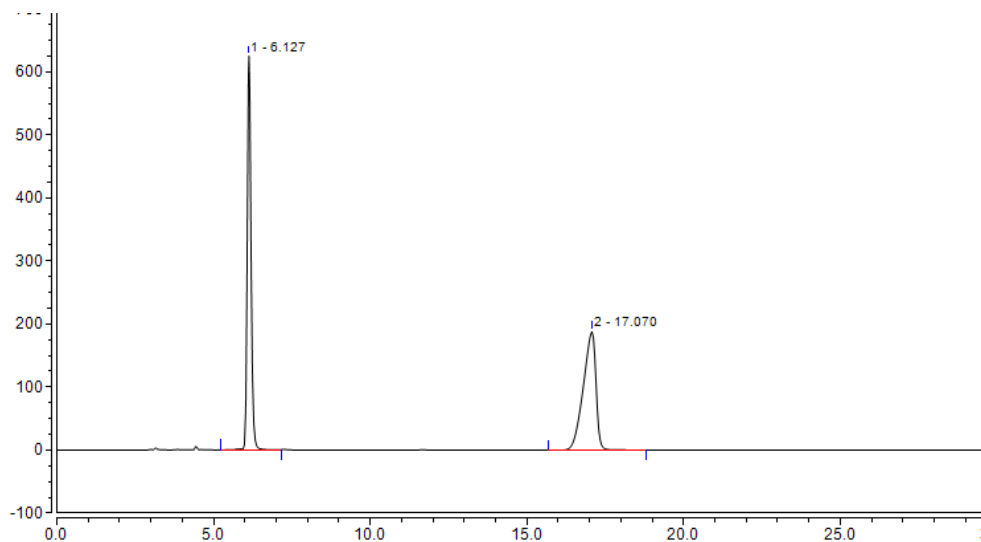

| Peak | Ret. Time (min) | Area (mAu*min) | Height (mAu) | Area % | Height % |
|------|-----------------|----------------|--------------|--------|----------|
| 1    | 6.127           | 87.612         | 624.960      | 49.96  | 76.88    |
| 2    | 17.070          | 87.755         | 187.981      | 50.04  | 23.12    |

**Supplementary Fig. 269. HPLC spectrum of racemic (P, Z)-6**

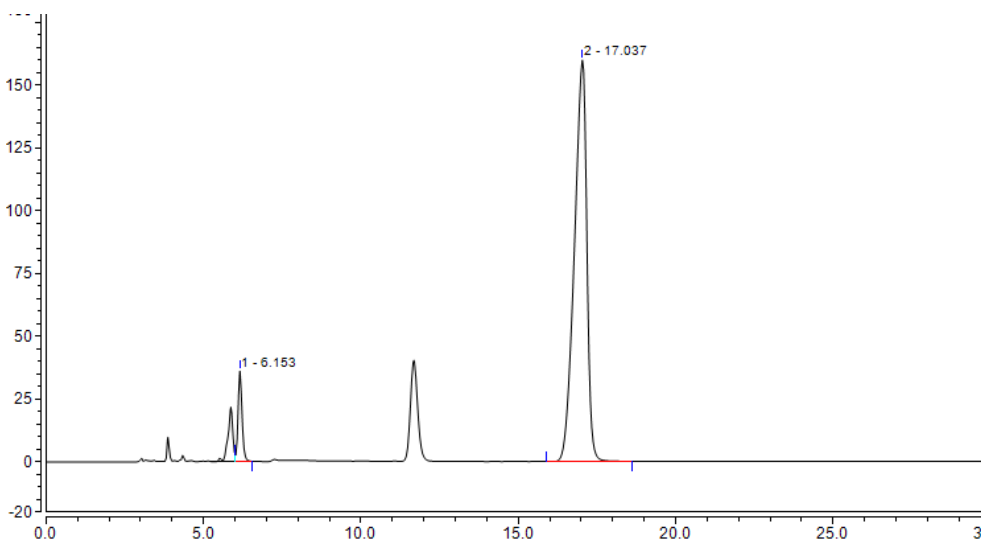

| Peak | Ret. Time (min) | Area (mAu*min) | Height (mAu) | Area % | Height % |
|------|-----------------|----------------|--------------|--------|----------|
| 1    | 6.153           | 5.219          | 35.924       | 6.67   | 18.35    |
| 2    | 17.037          | 72.975         | 159.814      | 93.33  | 81.65    |

**Supplementary Fig. 270. HPLC spectrum of chiral (P, Z)-6**

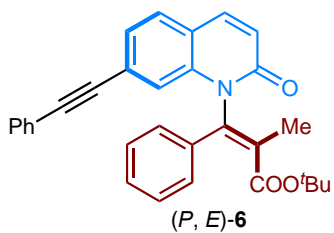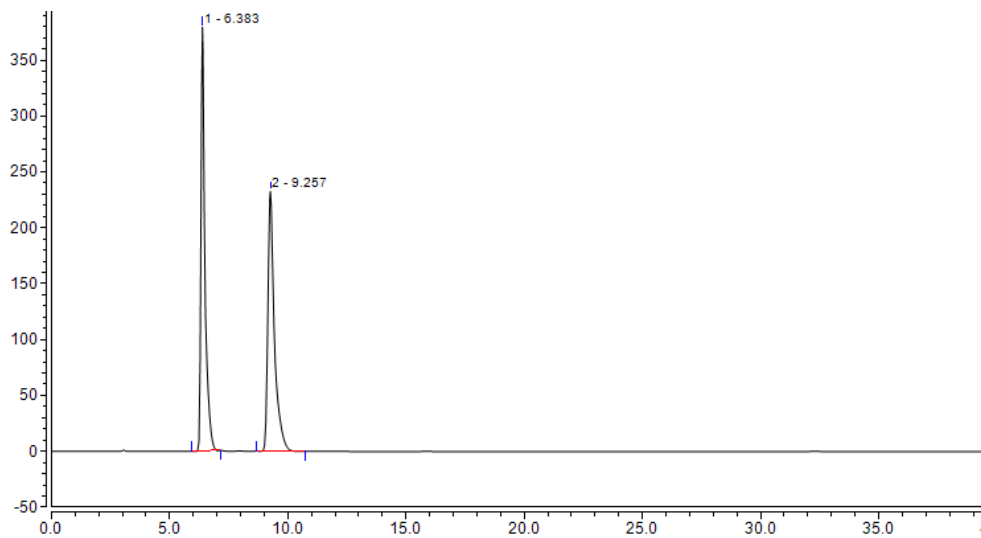

| Peak | Ret. Time (min) | Area (mAu*min) | Height (mAu) | Area % | Height % |
|------|-----------------|----------------|--------------|--------|----------|
| 1    | 6.383           | 73.523         | 379.077      | 49.87  | 61.99    |
| 2    | 9.257           | 73.910         | 232.393      | 50.13  | 38.01    |

**Supplementary Fig. 271. HPLC spectrum of racemic (P, E)-6**

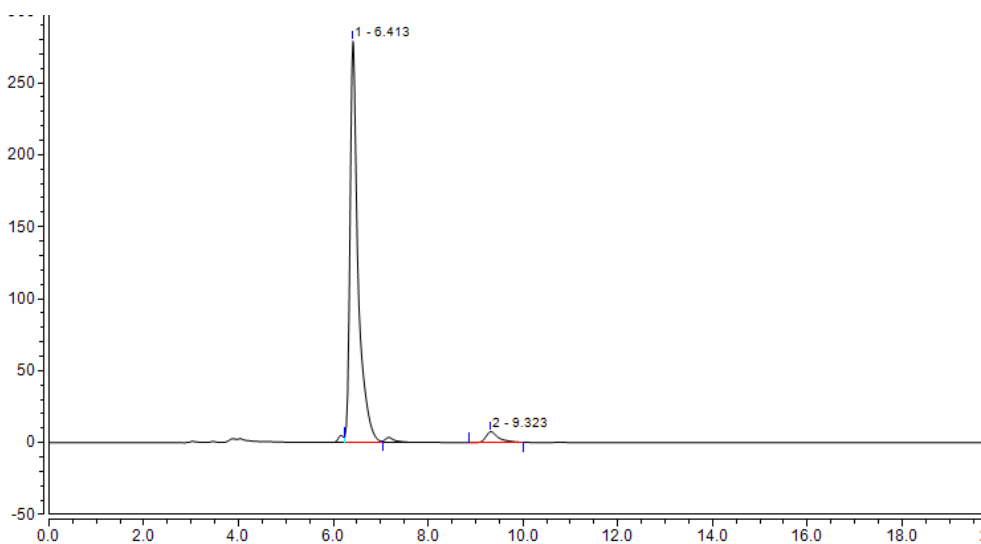

| Peak | Ret. Time (min) | Area (mAu*min) | Height (mAu) | Area % | Height % |
|------|-----------------|----------------|--------------|--------|----------|
| 1    | 6.413           | 54.735         | 278.833      | 95.94  | 97.38    |
| 2    | 9.323           | 2.315          | 7.515        | 4.06   | 2.62     |

**Supplementary Fig. 272. HPLC spectrum of chiral (P, E)-6**

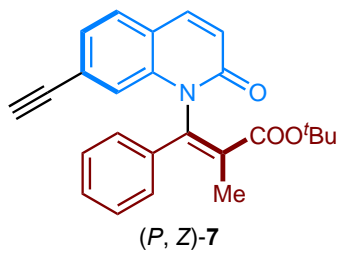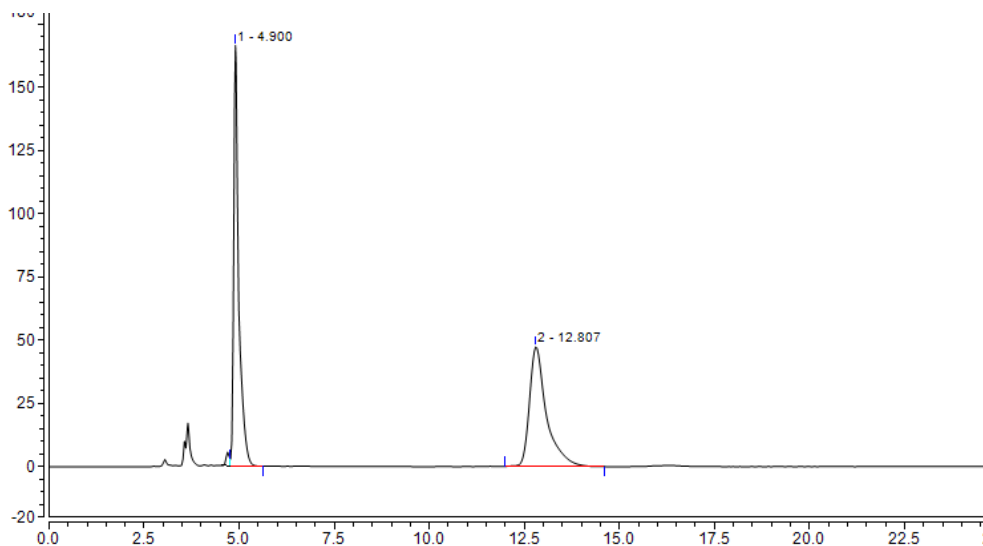

| Peak | Ret. Time (min) | Area (mAu*min) | Height (mAu) | Area % | Height % |
|------|-----------------|----------------|--------------|--------|----------|
| 1    | 4.900           | 25.228         | 166.207      | 50.71  | 77.81    |
| 2    | 12.807          | 24.520         | 47.404       | 49.29  | 22.19    |

**Supplementary Fig. 273. HPLC spectrum of racemic (*P, Z*)-7**

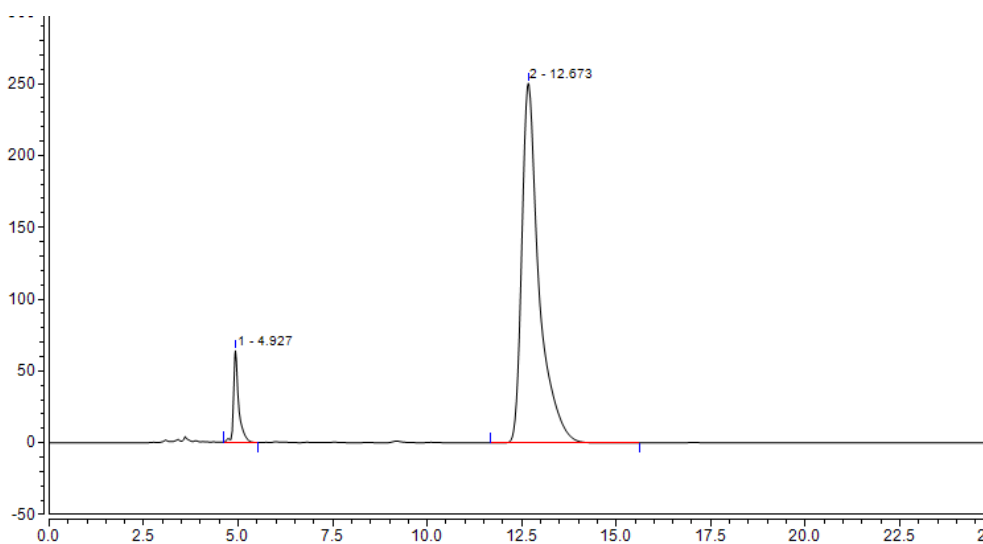

| Peak | Ret. Time (min) | Area (mAu*min) | Height (mAu) | Area % | Height % |
|------|-----------------|----------------|--------------|--------|----------|
| 1    | 4.927           | 9.838          | 63.740       | 6.95   | 20.29    |
| 2    | 12.675          | 131.754        | 250.461      | 93.05  | 79.71    |

**Supplementary Fig. 274. HPLC spectrum of chiral (*P, Z*)-7**

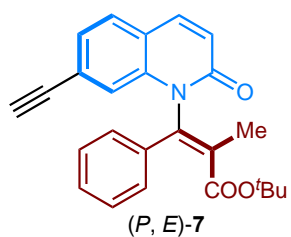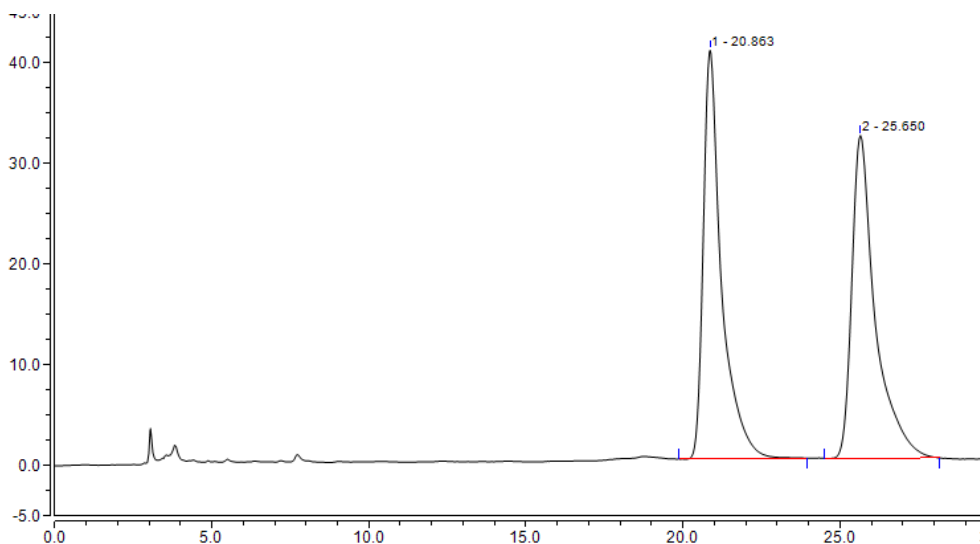

| Peak | Ret. Time (min) | Area (mAu*min) | Height (mAu) | Area % | Height % |
|------|-----------------|----------------|--------------|--------|----------|
| 1    | 20.863          | 27.270         | 40.567       | 49.69  | 55.86    |
| 2    | 25.650          | 27.614         | 32.060       | 50.31  | 44.14    |

**Supplementary Fig. 275. HPLC spectrum of racemic (*P, E*)-7**

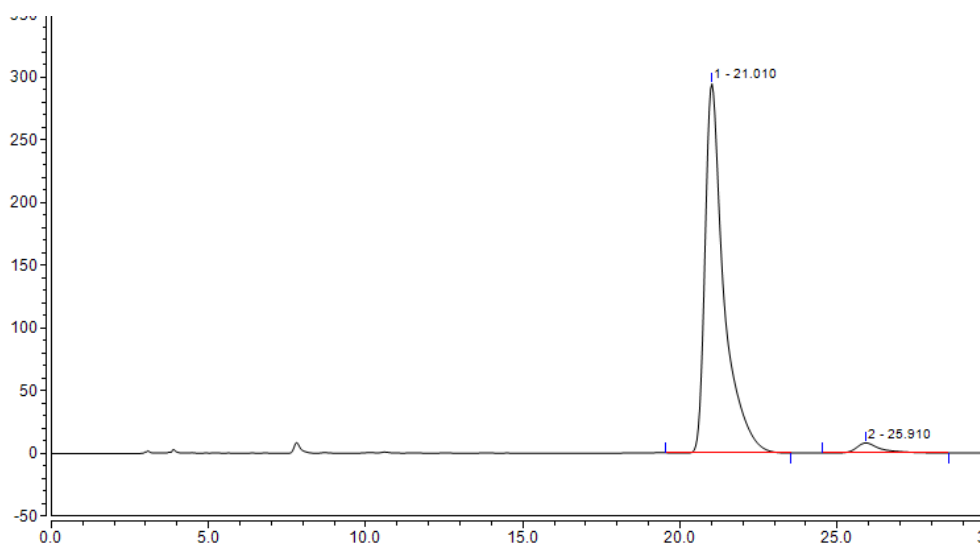

| Peak | Ret. Time (min) | Area (mAu*min) | Height (mAu) | Area % | Height % |
|------|-----------------|----------------|--------------|--------|----------|
| 1    | 21.010          | 203.840        | 294.455      | 96.52  | 97.32    |
| 2    | 25.910          | 7.351          | 8.098        | 3.48   | 2.68     |

**Supplementary Fig. 276. HPLC spectrum of chiral (*P, E*)-7**

## References

- [1] Frisch, M. J.; Trucks, G. W.; Schlegel, H. B.; Scuseria, G. E.; Robb, M. A.; Cheeseman, J. R.; Scalmani, G.; Barone, V.; Petersson, G. A.; Nakatsuji, H.; Li, X.; Caricato, M.; Marenich, A.; Bloino, J.; Janesko, J. B.; Gomperts, G. R.; Mennucci, B.; Hratchian, H. P.; Ortiz, J. V.; Izmaylov, A. F.; Sonnenberg, J. L.; Williams-Young, D.; Ding, F.; Lipparini, F.; Egidi, F.; Goings, J.; Peng, B.; Petrone, A.; Henderson, T.; Ranasinghe, D.; Zakrzewski, V. G.; Gao, J.; Rega, N.; Zheng, G.; Liang, W.; Hada, M.; Ehara, M.; Toyota, K.; Fukuda, R.; Hasegawa, J.; Ishida, M.; Nakajima, T.; Honda, Y.; Kitao, O.; Nakai, H.; Vreven, T.; Throssell, K.; Montgomery, J. A., Jr.; Peralta, J. E.; Ogliaro, F.; Bearpark, M.; Heyd, J. J.; Brothers, E. K.; Kudin, N.; Staroverov, V. N.; Keith, T.; Kobayashi, R.; Normand, J.; Raghavachari, K.; Rendell, A.; Burant, J. C.; Iyengar, S. S.; Tomasi, J.; Cossi, M.; Millam, J. M.; Klene, M.; Adamo, C.; Cammi, R.; Ochterski, J. W.; Martin, R. L.; Morokuma, K.; Farkas, O.; Foresman, J. B. & Fox, D. J. Gaussian, Inc., Wallingford CT, 2016.
- [2] Zhao, Y. & Truhlar, D. G. The M06 suite of density functionals for main group thermochemistry, thermochemical kinetics, noncovalent interactions, excited states, and transition elements: two new functionals and systematic testing of four M06-class functionals and 12 other functionals. *Theor. Chem. Acc.* **120**, 215-241 (2007).
- [3] Weigend, F. & Ahlrichs, R. Balanced basis sets of split valence, triple zeta valence and quadruple zeta valence quality for H to Rn: Design and assessment of accuracy. *Phys. Chem. Chem. Phys.* **7**, 3297-3305 (2005).
- [4] Marenich, A. V.; Cramer, C. J. & Truhlar, D. G. Universal solvation model based on solute electron density and on a continuum model of the solvent defined by the bulk dielectric constant and atomic surface tensions. *J. Phys. Chem. B.* **2009**, *113*, 6378-6396.
- [5] Lu, T. "sobMECP program"; [http://sobereva.com/286.\(10-27,2023\)](http://sobereva.com/286.(10-27,2023))
- [6] Lu, T. & Chen, F. Multiwfn: A multifunctional wavefunction analyzer, *J. Comput. Chem.* **33**, 580-592 (2012).
